# Supplementary material for: Efficacy of Topical Intervention for Recurrent Aphthous Stomatitis: A Network Meta-Analysis
Source: MDPI journal article supplement (doi:10.3390/medicina58060771), 2022-06-07
Supplement: s1 [file s1]

## **Supporting information**

Efficacy of topical intervention for recurrent aphthous stomatitis: A network meta-analysis

Table S1 Search Strategy

Table S2-S5 Search terms of PubMed, Web of Science, Cochrane Central Register of Controlled Trials and EMBASE

Table S6 Characteristics of included studies

Table S7 Outcomes of included studies

Table S8-S10 Details information of studies for each outcome in network meta-analysis

Table S11 PRISMA NMA Checklist of Items

Chapter S1 Healing effect

Chapter S2 Size-reducing effect

Chapter S3 Symptom-reducing effect

Chapter S4 Safety outcomes

Chapter S5 Relapse

Chart S1 “Time-Rank 1 probability” folding line chart

FigureS1 Risk of bias graph

Figure S2 Risk of bias summary for individual studies

Figure S3 Funnel plot for healing effect

Figure S4 Funnel plot for size-reducing effect

Figure S5 Funnel plot for symptom-reducing effect

Figure S6 Funnel plot for adverse effect

Figure S7 Network structure of sensitivity analysis

**Table S1 Search Strategy**

|                 |                                                                                                                                                                                                                                                                                                                                                                                                                                                                                                                                                                                                                                                                                                                                                                                                                                                                          |
|-----------------|--------------------------------------------------------------------------------------------------------------------------------------------------------------------------------------------------------------------------------------------------------------------------------------------------------------------------------------------------------------------------------------------------------------------------------------------------------------------------------------------------------------------------------------------------------------------------------------------------------------------------------------------------------------------------------------------------------------------------------------------------------------------------------------------------------------------------------------------------------------------------|
| Review question | What is the efficacy and safety of various topical interventions in patients with recurrent aphthous stomatitis (all types) in relation to each other or in comparison to placebo?                                                                                                                                                                                                                                                                                                                                                                                                                                                                                                                                                                                                                                                                                       |
| Population      | <p>Clinical or histopathological examination confirms a diagnosis of recurrent aphthous ulcers, with ulcer-like lesions visible anywhere on the oral mucosa.</p> <p>Simple ulcerative lesions of any undetermined cause such as psychological, nutritional and immunological factors, rather than oral manifestations of systemic diseases such as leukoaraiosis, diabetes mellitus, etc., or specific ulcerative lesions due to trauma, radiotherapy, etc.</p> <p>The population enrolled received only local interventions or placebo during the trial and did not receive any other treatment that might alter the RAU prior to or during the trial, such as receiving systemic steroids or immunosuppressants.</p> <p>For studies in patients with multiple oral mucosal diseases, we extracted only RAS data. If this was not possible, we excluded this study.</p> |
| Subgroups       | <p>The following factors will be considered for Subgroups if heterogeneity is present:</p> <p>Heterogeneity of single incorporated articles</p> <p>Treatment course</p> <p>Different RAS types</p> <p>Drug dose</p> <p>Forms of medication</p>                                                                                                                                                                                                                                                                                                                                                                                                                                                                                                                                                                                                                           |
| Interventions   | <ul style="list-style-type: none"> <li>• Allicin</li> <li>• Aloe</li> <li>• Amlexanox</li> <li>• Benzydamine</li> <li>• Berberine gelatin</li> <li>• Chitosan</li> <li>• Chlorhexidine</li> <li>• Clobetasol</li> <li>• Cryotherapy</li> <li>• Curcumin</li> <li>• Dexamethasone</li> <li>• Diosmectite</li> <li>• Doxycycline</li> <li>• Glycyrrhiza</li> <li>• Honey</li> <li>• Insulin-liposomal gel</li> <li>• Laser</li> <li>• Minocycline</li> <li>• N-acetylcysteine</li> <li>• Penicillin</li> <li>• Probiotics</li> <li>• Prostaglandin E2</li> <li>• Quercetin</li> </ul>                                                                                                                                                                                                                                                                                      |

|            |                                                                                                                                                                                                                                                                                                                                                                                                                                                                                                                                                                                                                                                                                                                                                                      |
|------------|----------------------------------------------------------------------------------------------------------------------------------------------------------------------------------------------------------------------------------------------------------------------------------------------------------------------------------------------------------------------------------------------------------------------------------------------------------------------------------------------------------------------------------------------------------------------------------------------------------------------------------------------------------------------------------------------------------------------------------------------------------------------|
|            | <ul style="list-style-type: none"> <li>• Silver nitrate</li> <li>• Sucralfate</li> <li>• Triamcinolone</li> <li>• Triester Glycerol Oxide</li> <li>• Zinc</li> </ul> <p>(Note: all doses, forms and durations will be included)</p>                                                                                                                                                                                                                                                                                                                                                                                                                                                                                                                                  |
| Comparison | <ul style="list-style-type: none"> <li>• Placebo</li> <li>• Allicin</li> <li>• Aloe</li> <li>• Amlexanox</li> <li>• Benzydamine</li> <li>• Berberine gelatin</li> <li>• Chitosan</li> <li>• Chlorhexidine</li> <li>• Clobetasol</li> <li>• Cryotherapy</li> <li>• Curcumin</li> <li>• Dexamethasone</li> <li>• Diosmectite</li> <li>• Doxycycline</li> <li>• Glycyrrhiza</li> <li>• Honey</li> <li>• Insulin-liposomal gel</li> <li>• Laser</li> <li>• Minocycline</li> <li>• N-acetylcysteine</li> <li>• Penicillin</li> <li>• Probiotics</li> <li>• Prostaglandin E2</li> <li>• Quercetin</li> <li>• Silver nitrate</li> <li>• Sucralfate</li> <li>• Triamcinolone</li> <li>• Triester Glycerol Oxide</li> <li>• Zinc</li> </ul>                                   |
| Outcomes   | <ul style="list-style-type: none"> <li>• Healing efficacy</li> </ul> <p>Evaluated by healing time, the time elapsed between the start of the intervention and the healing of the ulcerated lesion.</p> <ul style="list-style-type: none"> <li>• Effect of size reduction</li> </ul> <p>Evaluated by the effectiveness index, <math>EI = \text{ulcer reduction area (mm}^2\text{)} / \text{ulcer baseline area (mm}^2\text{)}</math>. The cumulative reduction in ulcer size at different examination days over the duration of the trial was counted.</p> <ul style="list-style-type: none"> <li>• Effect of symptom reduction</li> </ul> <p>Evaluated by the effectiveness index, <math>EI = \text{reduction in pain score} / \text{baseline ulcer pain}</math></p> |

|              |                                                                                                                                                                                                                                                                                                                                                                                                                                                                                            |
|--------------|--------------------------------------------------------------------------------------------------------------------------------------------------------------------------------------------------------------------------------------------------------------------------------------------------------------------------------------------------------------------------------------------------------------------------------------------------------------------------------------------|
|              | <p>score. Individual subject's VAS score or decile scale score of pain level on different examination days. The degree of cumulative pain relief was calculated.</p> <p>VAS score: 10 cm horizontal line, marked 0 = no pain to 10 = worst pain.</p> <p>Decile scale: 0 for no pain, 10 for most pain.</p> <ul style="list-style-type: none"> <li>• Safety outcomes</li> </ul> <p>Adverse effect</p> <p>Hematologic values</p> <ul style="list-style-type: none"> <li>• Relapse</li> </ul> |
| Study design | RCTs                                                                                                                                                                                                                                                                                                                                                                                                                                                                                       |
| Databases    | PubMed, Web of Science (WOS), Cochrane Central Register of Controlled Trials, Embase                                                                                                                                                                                                                                                                                                                                                                                                       |



**Table S2 Final search strategy for PubMed**

| #ID | Topic or intervention |          | Query                                                                                                                                                                                                                                                                                                                                      | Records |
|-----|-----------------------|----------|--------------------------------------------------------------------------------------------------------------------------------------------------------------------------------------------------------------------------------------------------------------------------------------------------------------------------------------------|---------|
| #1  | Recurrent Stomatitis  | Aphthous | ("Stomatitis, Aphthous" [Mesh]) OR ("Oral Ulcer" [Mesh]) OR (((((((Aphth* [Title/Abstract]) OR Canker sore [Title/Abstract]) OR Oral ulcer* [Title/Abstract]) OR Mouth ulcer* [Title/Abstract]) OR Recurrent aphthous ulcer* [Title/Abstract]) OR Recurrent aphthous stomatitis [Title/Abstract]) OR Aphthous stomatitis [Title/Abstract]) | 9988    |
| #2  | Clobetasol            |          | ("Clobetasol" [Mesh]) OR (Clobetasol [Title/Abstract]) OR (Corticosteroid [Title/Abstract]) OR (Clobetasol Propionate [Title/Abstract])                                                                                                                                                                                                    | 53558   |
| #3  | Betamethasone         |          | ("Betamethasone" [Mesh]) OR ("Betamethasone Valerate" [Mesh]) OR (Betamethasone [Title/Abstract]) OR (Betasolon [Title/Abstract]) OR (Betamethasone Valerate [Title/Abstract])                                                                                                                                                             | 9273    |
| #4  | Dexamethasone         |          | ("Dexamethasone" [Mesh]) OR (Dexamethasone [Title/Abstract]) OR (Dexamucobase [Title/Abstract])                                                                                                                                                                                                                                            | 75058   |
| #5  | Triamcinolone         |          | ("Triamcinolone" [Mesh]) OR ("Triamcinolone Acetonide" [Mesh]) OR (Triamcinolone [Title/Abstract]) OR (Triamcinolone Acetonide [Title/Abstract])                                                                                                                                                                                           | 12218   |
| #6  | Minocycline           |          | ("Minocycline" [Mesh]) OR (Minocycline [Title/Abstract])                                                                                                                                                                                                                                                                                   | 9428    |
| #7  | Doxycycline           |          | ("Doxycycline" [Mesh]) OR (Doxycycline [Title/Abstract])                                                                                                                                                                                                                                                                                   | 18183   |
| #8  | Penicillin            |          | ("Penicillin G"[Mesh]) OR ("Penicillin"[Mesh]) (Penicillin [Title/Abstract]) OR (Penicillin G Potassium [Title/Abstract]) OR (Penicillin G [Title/Abstract])                                                                                                                                                                               | 105884  |
| #9  | Benzydamine           |          | ("Benzydamine" [Mesh]) OR (Benzydamine [Title/Abstract])                                                                                                                                                                                                                                                                                   | 597     |
| #10 | Amlexanox             |          | Amlexanox[Title/Abstract]                                                                                                                                                                                                                                                                                                                  | 151     |
| #11 | Chlorhexidine         |          | ("Chlorhexidine" [Mesh]) OR (Chlorhexidine [Title/Abstract]) OR (Hibitane [Title/Abstract])                                                                                                                                                                                                                                                | 13254   |
| #12 | Hyaluronic Acid       |          | ("Hyaluronic Acid " [Mesh]) OR (Hyaluronic Acid [Title/Abstract])                                                                                                                                                                                                                                                                          | 31587   |
| #13 | Laser                 | CO2      | ("Laser Therapy"[Mesh]) OR ("Lasers"[Mesh]) OR (Low level laser therapy [Title/Abstract]) OR (Lasertherap* [Title/Abstract]) OR (LLLT* [Title/Abstract]) OR (Laser* [Title/Abstract])                                                                                                                                                      | 308558  |
|     |                       | Nd:YAG   |                                                                                                                                                                                                                                                                                                                                            |         |
|     |                       | diode    |                                                                                                                                                                                                                                                                                                                                            |         |
| #14 | Sodium lauryl sulfate |          | (Sodium lauryl sulfate dentifrice[Title/Abstract]) OR (Sodium lauryl sulfate toothpaste[Title/Abstract])                                                                                                                                                                                                                                   | 104     |

|     |                         |                                                                                                                                                                                                                                                                                              |        |
|-----|-------------------------|----------------------------------------------------------------------------------------------------------------------------------------------------------------------------------------------------------------------------------------------------------------------------------------------|--------|
| #15 | Probiotics              | ("probiotics" [Mesh]) OR ("Lactobacillales" [Mesh]) OR ("Lactococcus" [Mesh]) OR ("Bifidobacterium" [Mesh]) OR (probiotic* [Title/Abstract]) OR (lactobacilli [Title/Abstract]) OR (Lactobacillales [Title/Abstract]) OR (Lactococcus [Title/Abstract]) OR (Bifidobacteri* [Title/Abstract]) | 166173 |
| #16 | Insulin-liposomal gel   | Insulin-liposomal gel [Title/Abstract]                                                                                                                                                                                                                                                       | 1      |
| #17 | Salicept                | Salicept [Title/Abstract]                                                                                                                                                                                                                                                                    | 4      |
| #18 | HybenX                  | HybenX [Title/Abstract]                                                                                                                                                                                                                                                                      | 17     |
| #19 | Cryotherapy             | ("Cryotherapy" [Mesh]) OR (Cryotherapy [Title/Abstract])                                                                                                                                                                                                                                     | 31784  |
| #20 | Prostaglandin E2        | ("Dinoprostone" [Mesh]) OR (Prostaglandin E2 [Title/Abstract])                                                                                                                                                                                                                               | 37890  |
| #21 | Curcumin                | ("Curcumin" [Mesh]) OR (Curcumin [Title/Abstract])                                                                                                                                                                                                                                           | 17505  |
| #22 | Glycyrrhiza             | ("Glycyrrhiza" [Mesh]) OR (Glycyrrhiza [Title/Abstract])                                                                                                                                                                                                                                     | 3809   |
| #23 | Quercetin               | ("Quercetin" [Mesh]) OR (Quercetin [Title/Abstract])                                                                                                                                                                                                                                         | 21546  |
| #24 | Chitosan                | ("Chitosan" [Mesh]) OR (Chitosan [Title/Abstract])                                                                                                                                                                                                                                           | 33883  |
| #25 | Aloe                    | ("Aloe" [Mesh]) OR ("acemannan" [Supplementary Concept]) OR (Aloe [Title/Abstract]) OR (acemannan [Title/Abstract])                                                                                                                                                                          | 3217   |
| #26 | Honey                   | ("Honey" [Mesh]) OR (Honey [Title/Abstract])                                                                                                                                                                                                                                                 | 12937  |
| #27 | lavender oil            | ("lavender oil" [Supplementary Concept]) OR (lavender oil [Title/Abstract])                                                                                                                                                                                                                  | 442    |
| #28 | Berberine gelatin       | Berberine gelatin [Title/Abstract]                                                                                                                                                                                                                                                           | 1      |
| #29 | Diosmectite             | ("Smectite" [Supplementary Concept]) OR (Diosmectite [Title/Abstract])                                                                                                                                                                                                                       | 309    |
| #30 | Allicin                 | ("allicin" [Supplementary Concept]) OR (Allicin [Title/Abstract])                                                                                                                                                                                                                            | 900    |
| #31 | N-acetylcysteine        | ("Acetylcysteine" [Mesh]) OR (N-acetylcysteine [Title/Abstract])                                                                                                                                                                                                                             | 19573  |
| #32 | Sucralfate              | ("Sucralfate" [Mesh]) OR (Sucralfate [Title/Abstract])                                                                                                                                                                                                                                       | 2082   |
| #33 | Triester Glycerol Oxide | Triester Glycerol Oxide [Title/Abstract]                                                                                                                                                                                                                                                     | 5      |
| #34 | Cautery                 | Silver nitrate                                                                                                                                                                                                                                                                               | 20040  |
|     |                         | Debacterol                                                                                                                                                                                                                                                                                   |        |
|     |                         | ("Cautery" [Mesh]) OR (Silver nitrate [Title/Abstract]) OR (Debacterol [Title/Abstract]) OR (Cautery [Title/Abstract])                                                                                                                                                                       |        |
| #35 | Zinc                    | ("Zinc" [Mesh]) OR (Zinc [Title/Abstract])                                                                                                                                                                                                                                                   | 146109 |
| #36 | Final query             | #1 AND (#2 OR #3 OR #4 OR #5 OR #6 OR #7 OR #8 OR #9 OR #10 OR #11 OR #12 OR #13 OR #14                                                                                                                                                                                                      | 902    |

|  |  |                                                                                                                                                                     |  |
|--|--|---------------------------------------------------------------------------------------------------------------------------------------------------------------------|--|
|  |  | OR #15 OR #16 OR #17 OR #18 OR #19 OR #20 OR<br>#21 OR #22 OR #23 OR #24 OR #25 OR #26 OR #27<br>OR #28 OR #29 OR #30 OR #31 OR #32 OR #33 OR<br>#34 OR #35 OR #36) |  |
|--|--|---------------------------------------------------------------------------------------------------------------------------------------------------------------------|--|

**Table S3 Final search strategy for Web of Science**

| #ID | Topic or intervention         |                        | Query                                                                                                                                                                             | Records |
|-----|-------------------------------|------------------------|-----------------------------------------------------------------------------------------------------------------------------------------------------------------------------------|---------|
| #1  | Recurrent Aphthous Stomatitis |                        | (TS=(Aphth*) OR TS=(Canker sore) OR TS=(Oral ulcer*) OR TS=(Mouth ulcer*) OR TS=( Recurrent aphthous ulcer*) OR TS=( Recurrent aphthous stomatitis) OR TS=( Aphthous stomatitis)) | 47159   |
| #2  | Clobetasol                    |                        | (TS=(Clobetasol) OR TS=(Corticosteroid) OR TS=(Clobetasol Propionate))                                                                                                            | 163969  |
| #3  | Betamethasone                 |                        | (TS=(Betamethasone) OR TS=(Betasolon) OR TS=( Betamethasone Valerate))                                                                                                            | 10781   |
| #4  | Dexamethasone                 |                        | (TS=(Dexamethasone) OR TS=( Dexamucobase))                                                                                                                                        | 112334  |
| #5  | Triamcinolone                 |                        | (TS=(Triamcinolone) OR TS=(Triamcinolone Acetonide))                                                                                                                              | 18064   |
| #6  | Minocycline                   |                        | (TS=(Minocycline))                                                                                                                                                                | 13720   |
| #7  | Doxycycline                   |                        | (TS=(Doxycycline))                                                                                                                                                                | 28374   |
| #8  | Penicillin                    |                        | (TS=(Penicillin) OR TS=( Penicillin G Potassium) OR TS=( Penicillin G))                                                                                                           | 143392  |
| #9  | Benzydamine                   |                        | (TS=(Benzydamine))                                                                                                                                                                | 803     |
| #10 | Amlexanox                     |                        | (TS=(Amlexanox))                                                                                                                                                                  | 242     |
| #11 | Chlorhexidine                 |                        | (TS=(Chlorhexidine) OR TS=(Hibitane))                                                                                                                                             | 18711   |
| #12 | Hyaluronic Acid               |                        | (TS=(Hyaluronic Acid))                                                                                                                                                            | 46592   |
| #13 | Laser                         | CO2<br>Nd:YAG<br>diode | (TS=(Laser Therapy) OR TS=(Low level laser therapy) OR TS=(Lasertherap*) OR TS=(LLLT*) OR TS=(Laser*))                                                                            | 924745  |
| #14 | Sodium lauryl sulfate         |                        | (TS=(Sodium lauryl sulfate dentifrice) OR TS=( Sodium lauryl sulfate toothpaste))                                                                                                 | 161     |
| #15 | Probiotics                    |                        | (TS=(probiotic*) OR TS=(lactobacilli) OR TS=(Lactobacillales) OR TS=(Lactococcus) OR TS=(Bifidobacteri*))                                                                         | 187354  |
| #16 | Insulin-liposomal gel         |                        | (TS=(Insulin-liposomal gel))                                                                                                                                                      | 1       |
| #17 | Salicept                      |                        | (TS=(Salicept))                                                                                                                                                                   | 11      |
| #18 | HybenX                        |                        | (TS=(HybenX))                                                                                                                                                                     | 19      |
| #19 | Cryotherapy                   |                        | (TS=(Cryotherapy))                                                                                                                                                                | 15196   |
| #20 | Prostaglandin E2              |                        | (TS=(Prostaglandin E2) OR TS=(Dinoprostone))                                                                                                                                      | 51029   |
| #21 | Curcumin                      |                        | (TS=(Curcumin))                                                                                                                                                                   | 30010   |
| #22 | Glycyrrhiza                   |                        | (TS=(Glycyrrhiza))                                                                                                                                                                | 7474    |
| #23 | Quercetin                     |                        | (TS=(Quercetin))                                                                                                                                                                  | 40563   |
| #24 | Chitosan                      |                        | (TS=(Chitosan))                                                                                                                                                                   | 89698   |
| #25 | Aloe                          |                        | (TS=( Aloe) OR TS=(acemannan))                                                                                                                                                    | 7631    |
| #26 | Honey                         |                        | (TS=(Honey))                                                                                                                                                                      | 43877   |
| #27 | lavender oil                  |                        | (TS=( lavender oil))                                                                                                                                                              | 2124    |
| #28 | Berberine gelatin             |                        | (TS=(Berberine gelatin))                                                                                                                                                          | 27      |
| #29 | Diosmectite                   |                        | (TS=(Diosmectite))                                                                                                                                                                | 70      |

|     |                         |                                 |                                                                                                                                                                                                                                                            |        |
|-----|-------------------------|---------------------------------|------------------------------------------------------------------------------------------------------------------------------------------------------------------------------------------------------------------------------------------------------------|--------|
| #30 | Allicin                 |                                 | (TS=(Allicin))                                                                                                                                                                                                                                             | 1998   |
| #31 | N-acetylcysteine        |                                 | (TS=(N-acetylcysteine))                                                                                                                                                                                                                                    | 21589  |
| #32 | Sucralfate              |                                 | (TS=(Sucralfate))                                                                                                                                                                                                                                          | 2962   |
| #33 | Triester Glycerol Oxide |                                 | (TS=(Triester Glycerol Oxide))                                                                                                                                                                                                                             | 10     |
| #34 | Cautery                 | Silver<br>nitrate<br>Debacterol | (TS=(Cautery) OR TS=(Silver nitrate) OR<br>TS=(Debacterol))                                                                                                                                                                                                | 21048  |
| #35 | Zinc                    |                                 | (TS=(Zinc))                                                                                                                                                                                                                                                | 509430 |
| #36 | Final query             |                                 | #1 AND (#2 OR #3 OR #4 OR #5 OR #6 OR #7 OR<br>#8 OR #9 OR #10 OR #11 OR #12 OR #13 OR #14<br>OR #15 OR #16 OR #17 OR #18 OR #19 OR #20<br>OR #21 OR #22 OR #23 OR #24 OR #25 OR #26<br>OR #27 OR #28 OR #29 OR #30 OR #31 OR #32<br>OR #33 OR #34 OR #35) | 6303   |

**Table S4 Final search strategy for Cochrane Central Register of Controlled Trials**

| #ID | Topic or intervention         | Query                                                                                  | Records |
|-----|-------------------------------|----------------------------------------------------------------------------------------|---------|
| #1  | Recurrent Aphthous Stomatitis | MeSH descriptor: [Stomatitis, Aphthous] explode all trees                              | 242     |
| #2  |                               | MeSH descriptor: [Oral Ulcer] explode all trees                                        | 65      |
| #3  |                               | (Aphth*):ti,ab,kw                                                                      | 774     |
| #4  |                               | (Canker sore):ti,ab,kw                                                                 | 16      |
| #5  |                               | (Oral ulcer*):ti,ab,kw                                                                 | 4827    |
| #6  |                               | (Mouth ulcer*):ti,ab,kw                                                                | 929     |
| #7  |                               | (Recurrent aphthous ulcer*):ti,ab,kw                                                   | 342     |
| #8  |                               | (Recurrent aphthous stomatitis):ti,ab,kw                                               | 364     |
| #9  |                               | (Aphthous stomatitis):ti,ab,kw                                                         | 555     |
| #10 |                               | #1 OR #2 OR #3 OR #4 OR #5 OR #6 OR #7 OR #8 OR #9                                     | 5645    |
| #11 | Clobetasol                    | MeSH descriptor: [Clobetasol] explode all trees                                        | 382     |
| #12 |                               | (Clobetasol):ti,ab,kw OR (Corticosteroid):ti,ab,kw OR (Clobetasol Propionate):ti,ab,kw | 23575   |
| #13 |                               | #11 OR #12                                                                             | 23575   |
| #14 | Betamethasone                 | MeSH descriptor: [Betamethasone] explode all trees                                     | 1492    |
| #15 |                               | MeSH descriptor: [Betamethasone Valerate] explode all trees                            | 352     |
| #16 |                               | (Betamethasone):ti,ab,kw OR (Betasolon):ti,ab,kw OR (Betamethasone Valerate):ti,ab,kw  | 2570    |
| #17 |                               | #14 OR #15 OR #16                                                                      | 2846    |
| #18 | Dexamethasone                 | MeSH descriptor: [Dexamethasone] explode all trees                                     | 4794    |
| #19 |                               | (Dexamethasone):ti,ab,kw OR (Dexamucobase):ti,ab,kw                                    | 12687   |
| #20 |                               | #18 OR #19                                                                             | 12708   |
| #21 | Triamcinolone                 | MeSH descriptor: [Triamcinolone] explode all trees                                     | 1448    |
| #22 |                               | MeSH descriptor: [Triamcinolone Acetonide] explode all trees                           | 1138    |
| #23 |                               | (Triamcinolone):ti,ab,kw OR (Triamcinolone Acetonide):ti,ab,kw                         | 3320    |
| #24 |                               | #21 OR #22 OR #23                                                                      | 3320    |
| #25 | Minocycline                   | MeSH descriptor: [Minocycline] explode all trees                                       | 544     |
| #26 |                               | (Minocycline):ti,ab,kw                                                                 | 1126    |
| #27 |                               | #25 OR #26                                                                             | 1126    |
| #28 | Doxycycline                   | MeSH descriptor: [Doxycycline] explode all trees                                       | 1089    |
| #29 |                               | (Doxycycline):ti,ab,kw                                                                 | 2223    |
| #30 |                               | #28 OR #29                                                                             | 2223    |
| #31 | Penicillin                    | MeSH descriptor: [Penicillin G] explode all trees                                      | 4719    |

|     |                       |                  |                                                                                                                                       |       |
|-----|-----------------------|------------------|---------------------------------------------------------------------------------------------------------------------------------------|-------|
| #32 |                       |                  | (Penicillin):ti,ab,kw OR (Penicillin G Potassium):ti,ab,kw OR (penicillin G):ti,ab,kw                                                 | 3529  |
| #33 |                       |                  | #31 OR #32                                                                                                                            | 7005  |
| #34 | Benzydamine           |                  | MeSH descriptor: [Benzydamine] explode all trees                                                                                      | 104   |
| #35 |                       |                  | (Benzydamine):ti,ab,kw                                                                                                                | 258   |
| #36 |                       |                  | #34 OR #35                                                                                                                            | 258   |
| #37 | Amlexanox             |                  | (Amlexanox):ti,ab,kw                                                                                                                  | 27    |
| #38 | Chlorhexidine         |                  | MeSH descriptor: [Chlorhexidine] explode all trees                                                                                    | 2296  |
| #39 |                       |                  | (Chlorhexidine):ti,ab,kw OR (Hibitane):ti,ab,kw                                                                                       | 5022  |
| #40 |                       |                  | #38 OR #39                                                                                                                            | 5022  |
| #41 | Hyaluronic Acid       |                  | MeSH descriptor: [Hyaluronic Acid] explode all trees                                                                                  | 1722  |
| #42 |                       |                  | (Hyaluronic Acid):ti,ab,kw                                                                                                            | 3421  |
| #43 |                       |                  | #41 OR #42                                                                                                                            | 3421  |
| #44 | Laser                 | CO2、Nd:YAG、diode | MeSH descriptor: [Laser Therapy] explode all trees                                                                                    | 4309  |
| #45 |                       |                  | MeSH descriptor: [Lasers] explode all trees                                                                                           | 2308  |
| #46 |                       |                  | (Low level laser therapy):ti,ab,kw OR (Lasertherap*):ti,ab,kw OR (LLLT*):ti,ab,kw OR (Laser*):ti,ab,kw                                | 20404 |
| #47 |                       |                  | #44 OR #45 OR #46                                                                                                                     | 20509 |
| #48 | Sodium lauryl sulfate |                  | (Sodium lauryl sulfate dentifrice):ti,ab,kw OR (Sodium lauryl sulfate toothpaste):ti,ab,kw                                            | 52    |
| #49 | Probiotics            |                  | MeSH descriptor: [Probiotics] explode all trees                                                                                       | 2208  |
| #50 |                       |                  | MeSH descriptor: [Lactobacillales] explode all trees                                                                                  | 3480  |
| #51 |                       |                  | MeSH descriptor: [Lactococcus] explode all trees                                                                                      | 16    |
| #52 |                       |                  | MeSH descriptor: [Bifidobacterium] explode all trees                                                                                  | 759   |
| #53 |                       |                  | (probiotic*):ti,ab,kw OR (lactobacilli):ti,ab,kw OR (Lactobacillales):ti,ab,kw OR (Lactococcus):ti,ab,kw OR (Bifidobacteri*):ti,ab,kw | 9131  |
| #54 |                       |                  | #49 OR #50 OR #51 OR #52 OR #53                                                                                                       | 11104 |
| #55 | Insulin-liposomal gel |                  | (Insulin-liposomal gel):ti,ab,kw                                                                                                      | 1     |
| #56 | Salicept              |                  | (Salicept):ti,ab,kw                                                                                                                   | 2     |
| #57 | HybenX                |                  | (HybenX):ti,ab,kw                                                                                                                     | 9     |
| #58 | Cryotherapy           |                  | MeSH descriptor: [Cryotherapy] explode all trees                                                                                      | 1669  |
| #59 |                       |                  | (Cryotherapy):ti,ab,kw                                                                                                                | 2291  |
| #60 |                       |                  | #58 OR #59                                                                                                                            | 3231  |
| #61 | Prostaglandin E2      |                  | MeSH descriptor: [Dinoprostone] explode all trees                                                                                     | 1164  |
| #62 |                       |                  | (Prostaglandin E2):ti,ab,kw                                                                                                           | 1994  |
| #63 |                       |                  | #61 OR #62                                                                                                                            | 2495  |
| #64 | Curcumin              |                  | MeSH descriptor: [Curcumin] explode all trees                                                                                         | 437   |
| #65 |                       |                  | (Curcumin):ti,ab,kw                                                                                                                   | 1277  |

|     |                         |                                  |                                                                                                                                                                                                                                                       |      |
|-----|-------------------------|----------------------------------|-------------------------------------------------------------------------------------------------------------------------------------------------------------------------------------------------------------------------------------------------------|------|
| #66 |                         |                                  | #64 OR #65                                                                                                                                                                                                                                            | 1277 |
| #67 | Glycyrrhiza             |                                  | MeSH descriptor: [Glycyrrhiza] explode all trees                                                                                                                                                                                                      | 105  |
| #68 |                         |                                  | (Glycyrrhiza):ti,ab,kw                                                                                                                                                                                                                                | 351  |
| #69 |                         |                                  | #67 OR #68                                                                                                                                                                                                                                            | 351  |
| #70 | Quercetin               |                                  | MeSH descriptor: [Quercetin] explode all trees                                                                                                                                                                                                        | 205  |
| #71 |                         |                                  | (Quercetin):ti,ab,kw                                                                                                                                                                                                                                  | 518  |
| #72 |                         |                                  | #70 OR #71                                                                                                                                                                                                                                            | 518  |
| #73 | Chitosan                |                                  | MeSH descriptor: [Quercetin] explode all trees                                                                                                                                                                                                        | 205  |
| #74 |                         |                                  | (Chitosan):ti,ab,kw                                                                                                                                                                                                                                   | 480  |
| #75 |                         |                                  | #73 OR #74                                                                                                                                                                                                                                            | 685  |
| #76 | Aloe                    |                                  | MeSH descriptor: [Aloe] explode all trees                                                                                                                                                                                                             | 681  |
| #77 |                         |                                  | (Aloe):ti,ab,kw OR (acemannan):ti,ab,kw                                                                                                                                                                                                               | 81   |
| #78 |                         |                                  | #76 OR #77                                                                                                                                                                                                                                            | 681  |
| #79 | Honey                   |                                  | MeSH descriptor: [Honey] explode all trees                                                                                                                                                                                                            | 163  |
| #80 |                         |                                  | (honey):ti,ab,kw                                                                                                                                                                                                                                      | 1129 |
| #81 |                         |                                  | #79 OR #80                                                                                                                                                                                                                                            | 1129 |
| #82 | Lavender oil            |                                  | (lavender oil):ti,ab,kw                                                                                                                                                                                                                               | 524  |
| #83 | Berberine gelatin       |                                  | (Berberine gelatin):ti,ab,kw                                                                                                                                                                                                                          | 1    |
| #84 | Diosmectite             |                                  | (Diosmectite):ti,ab,kw                                                                                                                                                                                                                                | 30   |
| #85 | Allicin                 |                                  | (Allicin):ti,ab,kw                                                                                                                                                                                                                                    | 50   |
| #86 | N-acetylcysteine        |                                  | MeSH descriptor: [Acetylcysteine] explode all trees                                                                                                                                                                                                   | 1155 |
| #87 |                         |                                  | (N-acetylcysteine):ti,ab,kw                                                                                                                                                                                                                           | 1804 |
| #88 |                         |                                  | #86 OR #87                                                                                                                                                                                                                                            | 2144 |
| #89 | Sucralfate              |                                  | MeSH descriptor: [Sucralfate] explode all trees                                                                                                                                                                                                       | 398  |
| #90 |                         |                                  | (Sucralfate):ti,ab,kw                                                                                                                                                                                                                                 | 798  |
| #91 |                         |                                  | #89 OR #90                                                                                                                                                                                                                                            | 798  |
| #92 | Triester Glycerol Oxide |                                  | (Triester Glycerol Oxide):ti,ab,kw                                                                                                                                                                                                                    | 6    |
| #93 | Cautery                 | Silver<br>nitrate、<br>Debacterol | MeSH descriptor: [Cautery] explode all trees                                                                                                                                                                                                          | 805  |
| #94 |                         |                                  | (Cautery):ti,ab,kw OR (Silver nitrate):ti,ab,kw OR (Debacterol):ti,ab,kw                                                                                                                                                                              | 627  |
| #95 |                         |                                  | #93 OR #94                                                                                                                                                                                                                                            | 1309 |
| #96 | Zinc                    |                                  | MeSH descriptor: [Zinc] explode all trees                                                                                                                                                                                                             | 1677 |
| #97 |                         |                                  | (Zinc):ti,ab,kw                                                                                                                                                                                                                                       | 8083 |
| #98 |                         |                                  | #96 OR #97                                                                                                                                                                                                                                            | 8083 |
| #99 | Final query             |                                  | #10 AND (#13 OR #17 OR #20 OR #24 OR #27 OR #30 OR #33 OR #36 OR #37 OR #40 OR #43 OR #47 OR #48 OR #54 OR #55 OR # 56 OR #57 OR #60 OR #63 OR #66 OR #69 OR #72 OR #75 OR #78 OR #81 OR #82 OR #83 OR #84 OR #85 OR #88 OR #91 OR #92 OR #95 OR #98) | 1560 |
|     | Cochrane Reviews        |                                  |                                                                                                                                                                                                                                                       | 69   |
|     | Trials                  |                                  |                                                                                                                                                                                                                                                       | 1489 |



**Table S5 Final search strategy for Embase**

| #ID | Topic or intervention | Query                                                                                                                                                                                                                | Records |
|-----|-----------------------|----------------------------------------------------------------------------------------------------------------------------------------------------------------------------------------------------------------------|---------|
| #1  | Recurrent Aphthous    | 'mouth ulcer'/exp OR 'aphthous stomatitis'/exp                                                                                                                                                                       | 19837   |
| #2  | Stomatitis            | aphth*:ti,ab,kw OR 'canker sore':ti,ab,kw OR 'oral ulcer*':ti,ab,kw OR 'mouth ulcer*':ti,ab,kw OR 'recurrent aphthous ulcer*':ti,ab,kw OR 'recurrent aphthous stomatitis':ti,ab,kw OR 'aphthous stomatitis':ti,ab,kw | 11455   |
| #3  |                       | #1 OR #2                                                                                                                                                                                                             | 23211   |
| #4  | Clobetasol            | 'clobetasol'/exp                                                                                                                                                                                                     | 3164    |
| #5  |                       | (Clobetasol):ti,ab,kw OR (Corticosteroid):ti,ab,kw OR (Clobetasol Propionate):ti,ab,kw                                                                                                                               | 78877   |
| #6  |                       | #4 AND #5                                                                                                                                                                                                            | 81186   |
| #7  | Betamethasone         | 'betamethasone'/exp OR 'betamethasone valerate'/exp                                                                                                                                                                  | 21527   |
| #8  |                       | betamethasone:ti,ab,kw OR betasolon:ti,ab,kw OR 'betamethasone valerate':ti,ab,kw                                                                                                                                    | 7514    |
| #9  |                       | #7 OR #8                                                                                                                                                                                                             | 23136   |
| #10 | Dexamethasone         | 'dexamethasone'/exp                                                                                                                                                                                                  | 164002  |
| #11 |                       | dexamethasone:ti,ab,kw OR dexamucobase:ti,ab,kw                                                                                                                                                                      | 83821   |
| #12 |                       | #10 OR #11                                                                                                                                                                                                           | 175940  |
| #13 | Triamcinolone         | 'triamcinolone'/exp OR 'triamcinolone acetonide'/exp                                                                                                                                                                 | 30533   |
| #14 |                       | triamcinolone:ti,ab,kw OR 'triamcinolone acetonide':ti,ab,kw                                                                                                                                                         | 11046   |
| #15 |                       | #13 OR #14                                                                                                                                                                                                           | 31894   |
| #16 | Minocycline           | 'minocycline'/exp                                                                                                                                                                                                    | 25639   |
| #17 |                       | minocycline:ti,ab,kw                                                                                                                                                                                                 | 9918    |
| #18 |                       | #16 OR #17                                                                                                                                                                                                           | 26613   |
| #19 | Doxycycline           | 'doxycycline'/exp                                                                                                                                                                                                    | 57207   |
| #20 |                       | doxycycline:ti,ab,kw                                                                                                                                                                                                 | 21704   |
| #21 |                       | #19 OR #20                                                                                                                                                                                                           | 59886   |
| #22 | Penicillin            | 'penicillin g'/exp                                                                                                                                                                                                   | 83154   |
| #23 |                       | penicillin:ti,ab,kw OR 'penicillin g potassium':ti,ab,kw OR 'penicillin g':ti,ab,kw                                                                                                                                  | 62134   |
| #24 |                       | #22 OR #23                                                                                                                                                                                                           | 121598  |
| #25 | Benzydamine           | 'benzydamine'/exp                                                                                                                                                                                                    | 1564    |
| #26 |                       | benzydamine:ti,ab,kw                                                                                                                                                                                                 | 707     |
| #27 |                       | #25 OR #26                                                                                                                                                                                                           | 1710    |
| #28 | Amlexanox             | amlexanox:ti,ab,kw                                                                                                                                                                                                   | 211     |
| #29 | Chlorhexidine         | 'chlorhexidine'/exp                                                                                                                                                                                                  | 18967   |
| #30 |                       | chlorhexidine:ti,ab,kw OR hibitane:ti,ab,kw                                                                                                                                                                          | 13927   |

|     |                       |                          |                                                                                                                                   |        |
|-----|-----------------------|--------------------------|-----------------------------------------------------------------------------------------------------------------------------------|--------|
| #31 |                       |                          | #29 OR #30                                                                                                                        | 23175  |
| #32 | Hyaluronic Acid       |                          | 'hyaluronic acid'/exp                                                                                                             | 46079  |
| #33 |                       |                          | 'hyaluronic acid':ti,ab,kw                                                                                                        | 26672  |
| #34 |                       |                          | #32 OR #33                                                                                                                        | 50728  |
| #35 | Laser                 | CO2、<br>Nd:YAG、<br>diode | 'low level laser therapy'/exp OR 'laser'/exp                                                                                      | 172779 |
| #36 |                       |                          | 'low level laser therapy':ti,ab,kw OR<br>lasertherap*:ti,ab,kw OR lllt*:ti,ab,kw OR<br>laser*:ti,ab,kw                            | 304449 |
| #37 |                       |                          | #35 OR #36                                                                                                                        | 335329 |
| #38 | Sodium lauryl sulfate |                          | (Sodium lauryl sulfate dentifrice):ti,ab,kw OR<br>(Sodium lauryl sulfate toothpaste):ti,ab,kw                                     | 0      |
| #39 | Probiotics            |                          | 'probiotic agent'/exp OR 'lactobacillales'/exp OR<br>'lactococcus'/exp OR 'bifidobacterium'/exp                                   | 272586 |
| #40 |                       |                          | probiotic*:ti,ab,kw OR lactobacilli:ti,ab,kw OR<br>lactobacillales:ti,ab,kw OR lactococcus:ti,ab,kw<br>OR bifidobacteri*:ti,ab,kw | 59391  |
| #41 |                       |                          | #39 OR #40                                                                                                                        | 279556 |
| #42 | Insulin-liposomal gel |                          | 'insulin-liposomal gel':ti,ab,kw                                                                                                  | 1      |
| #43 | Salicept              |                          | salicept:ti,ab,kw                                                                                                                 | 6      |
| #44 | HybenX                |                          | hybenx:ti,ab,kw                                                                                                                   | 13     |
| #45 | Cryotherapy           |                          | 'cryotherapy'/exp                                                                                                                 | 37910  |
| #46 |                       |                          | cryotherapy:ti,ab,kw                                                                                                              | 11654  |
| #47 |                       |                          | #45 OR #46                                                                                                                        | 39784  |
| #48 | Prostaglandin E2      |                          | 'prostaglandin e2'/exp                                                                                                            | 57910  |
| #49 |                       |                          | 'prostaglandin e2':ti,ab,kw                                                                                                       | 10531  |
| #50 |                       |                          | #48 OR #49                                                                                                                        | 60453  |
| #51 | Curcumin              |                          | 'curcumin'/exp                                                                                                                    | 28319  |
| #52 |                       |                          | curcumin:ti,ab,kw                                                                                                                 | 21431  |
| #53 |                       |                          | #51 OR #52                                                                                                                        | 29950  |
| #54 | Glycyrrhiza           |                          | 'glycyrrhiza'/exp                                                                                                                 | 6231   |
| #55 |                       |                          | glycyrrhiza:ti,ab,kw                                                                                                              | 2858   |
| #56 |                       |                          | #54 OR #55                                                                                                                        | 7108   |
| #57 | Quercetin             |                          | 'quercetin'/exp                                                                                                                   | 34523  |
| #58 |                       |                          | quercetin:ti,ab,kw                                                                                                                | 25917  |
| #59 |                       |                          | #57 OR #58                                                                                                                        | 40873  |
| #60 | Chitosan              |                          | 'chitosan'/exp                                                                                                                    | 36676  |
| #61 |                       |                          | chitosan:ti,ab,kw                                                                                                                 | 39460  |
| #62 |                       |                          | #60 OR #61                                                                                                                        | 44767  |
| #63 | Aloe                  |                          | 'aloe'/exp OR 'acemannan'/exp                                                                                                     | 4031   |
| #64 |                       |                          | aloe:ti,ab,kw OR acemannan:ti,ab,kw                                                                                               | 4626   |
| #65 |                       |                          | #63 OR #64                                                                                                                        | 5954   |
| #66 | Honey                 |                          | 'honey'/exp                                                                                                                       | 8250   |
| #67 |                       |                          | honey:ti,ab,kw                                                                                                                    | 14894  |

|     |                         |                                  |                                                                                                                                                                                                                                          |         |
|-----|-------------------------|----------------------------------|------------------------------------------------------------------------------------------------------------------------------------------------------------------------------------------------------------------------------------------|---------|
| #68 |                         |                                  | #66 OR #67                                                                                                                                                                                                                               | 16060   |
| #69 | Lavender oil            |                                  | 'lavender oil'/exp                                                                                                                                                                                                                       | 1259    |
| #70 |                         |                                  | 'lavender oil':ti,ab,kw                                                                                                                                                                                                                  | 456     |
| #71 |                         |                                  | #69 OR #70                                                                                                                                                                                                                               | 1337    |
| #72 | Berberine gelatin       |                                  | 'berberine gelatin':ti,ab,kw                                                                                                                                                                                                             | 1       |
| #73 | Diosmectite             |                                  | 'diosmectite'/exp                                                                                                                                                                                                                        | 44      |
| #74 |                         |                                  | diosmectite:ti,ab,kw                                                                                                                                                                                                                     | 53      |
| #75 |                         |                                  | #73 OR #74                                                                                                                                                                                                                               | 76      |
| #76 | Allicin                 |                                  | 'allicin'/exp                                                                                                                                                                                                                            | 1573    |
| #77 |                         |                                  | allicin:ti,ab,kw                                                                                                                                                                                                                         | 1144    |
| #78 |                         |                                  | #76 OR #77                                                                                                                                                                                                                               | 1755    |
| #79 | N-acetylcysteine        |                                  | 'acetylcysteine'/exp                                                                                                                                                                                                                     | 38564   |
| #80 |                         |                                  | 'n acetylcysteine':ti,ab,kw                                                                                                                                                                                                              | 15862   |
| #81 |                         |                                  | #79 OR #80                                                                                                                                                                                                                               | 40501   |
| #82 | Sucralfate              |                                  | 'sucralfate'/exp                                                                                                                                                                                                                         | 7121    |
| #83 |                         |                                  | sucralfate:ti,ab,kw                                                                                                                                                                                                                      | 2542    |
| #84 |                         |                                  | #82 OR #83                                                                                                                                                                                                                               | 7373    |
| #85 | Triester Glycerol Oxide |                                  | 'triester glycerol oxide':ti,ab,kw                                                                                                                                                                                                       | 9       |
| #86 | Cautery                 | Silver<br>nitrate、<br>Debacterol | 'cauterization'/exp                                                                                                                                                                                                                      | 15544   |
| #87 |                         |                                  | cautery:ti,ab,kw OR 'silver nitrate':ti,ab,kw OR debacterol:ti,ab,kw                                                                                                                                                                     | 9652    |
| #88 |                         |                                  | #86 OR #87                                                                                                                                                                                                                               | 22264   |
| #89 | Zinc                    |                                  | 'zinc'/exp                                                                                                                                                                                                                               | 125700  |
| #90 |                         |                                  | zinc:ti,ab,kw                                                                                                                                                                                                                            | 148781  |
| #91 |                         |                                  | #89 OR #90                                                                                                                                                                                                                               | 206697  |
| #92 | Final query             |                                  | #6 OR #9 OR #12 OR #15 OR #18 OR #21 OR #24 OR #27 OR #28 OR #31 OR #34 OR #37 OR #38 OR #41 OR #42 OR #43 OR #44 OR #47 OR #50 OR #53 OR #56 OR #59 OR #62 OR #65 OR #68 OR #71 OR #72 OR #75 OR #78 OR #81 OR #84 OR #85 OR #88 OR #91 | 1604834 |
| #93 |                         |                                  | #3 AND #92                                                                                                                                                                                                                               | 3268    |

**Table S6 Characteristics of included studies**

| Author Year            | Country | Type of study | Type of RAS          | Patients    |             |             | Comparison                                          |                                                                                                                                                  |
|------------------------|---------|---------------|----------------------|-------------|-------------|-------------|-----------------------------------------------------|--------------------------------------------------------------------------------------------------------------------------------------------------|
|                        |         |               |                      | Male/Female | Age         |             | Intervention (N)                                    | Treatment Course                                                                                                                                 |
| Huo<br>2021            | China   | RCT           | minor aphthous ulcer | 8/17        | Under 40:16 | Above 40:9  | diode laser 810 nm (25)                             | once daily for continuous 3 days                                                                                                                 |
|                        |         |               |                      | 9/17        | Under 40:13 | Above 40:13 | triamcinolone acetonide 0.1% (26)                   | three times a day until the lesion was healed                                                                                                    |
| Aggour (adult)<br>2021 | Egypt   | RCT           | minor RAS            | 11/19       | 28.82±8.44  |             | ChocBalls (L. acidophilus containing lozenges) (30) | melt in the mouth slowly twice daily for 5 days                                                                                                  |
|                        |         |               |                      | 10/20       | 29.38±9.06  |             | Oracure oral gel (30)                               | melt in the mouth slowly twice daily for 5 days                                                                                                  |
| Aggour (child)<br>2021 | Egypt   | RCT           | minor RAS            | 12/18       | 6.82±2.44   |             | ChocBalls (L. acidophilus containing lozenges) (30) | melt in the mouth slowly twice daily for 5 days                                                                                                  |
|                        |         |               |                      | 14/16       | 7.18±1.96   |             | Oracure oral gel (30)                               | melt in the mouth slowly twice daily for 5 days                                                                                                  |
| Shi<br><br>2020        | China   | RCT           | NA                   | 8/12        | 30.5±26.6   |             | aloe vera fermentation gel (20)                     | apply a layer of gel on the surface of the ulcer every day after each meal (three times each day) until the ulcer disappeared                    |
|                        |         |               |                      | 4/11        | 26.07±56.44 |             | chitosan gel (15)                                   | apply a layer of gel on the surface of the ulcer every day after each meal (three times each day) until the ulcer disappeared                    |
| Kavita<br><br>2020     | India   | RCT           | NA                   | NA          | 18-48       |             | 0.1% topical triamcinolone acetonide (30)           | apply paste on the ulcers three to four times per day for a minimum of 10 min                                                                    |
|                        |         |               |                      |             |             |             | 5% topical amlexanox (30)                           | apply paste on the ulcers three to four times per day for a minimum of 10 min                                                                    |
| Shao<br><br>2020       | China   | RCT           | NA                   | 15/19       | 31.62±8.45  |             | film containing chitosan (34)                       | twice a day (after breakfast and after dinner). The lasting time of the film is about 1 h. Avoid drinking or eating for 1 h after using the film |
|                        |         |               |                      | 17/15       | 28.72±6.23  |             | polyvinyl alcohol film (32)                         | twice a day (after breakfast and after dinner). The lasting time of the film is about 1 h. Avoid drinking or eating for 2 h after using the film |

|          |         |     |                                         |       |               |                                                                                                               |                                                                                                                                                                                     |
|----------|---------|-----|-----------------------------------------|-------|---------------|---------------------------------------------------------------------------------------------------------------|-------------------------------------------------------------------------------------------------------------------------------------------------------------------------------------|
| Pedersen | Denmark | RCT | minor or major                          | 2/8   | 22.7 (18-28)  | test lozenges contained a mix of two probiotic strains, Lactobacillus reuteri DSM17938 and ATCC PTA 5289 (10) | take two lozenges per day (morning and evening) for 90 days                                                                                                                         |
| 2020     |         |     |                                         | 5/5   | 24.8 (22-30)  | placebo lozenges without bacteria (10)                                                                        | take two lozenges per day (morning and evening) for 90 days                                                                                                                         |
| Ghorbani | Iran    | RCT | minor aphthous ulcers                   | 10/13 | 38.66±21.60   | mucoadhesive tablet with zinc sulfate (23)                                                                    | 3 times a day. The duration of the intervention was 7 days                                                                                                                          |
| 2020     |         |     |                                         | 9/14  | 41.28±24.37   | placebo without zinc sulfate (23)                                                                             | 3 times a day. The duration of the intervention was 7 days                                                                                                                          |
| Ibrahim  | Egypt   | RCT | NA                                      | 6/14  | 36.60±11.50   | Kenalog in Orabase contained triamcinolone acetonide (20)                                                     | two times per day, once in the morning and the other at bed time, after meals for 1 or 2 weeks according to patient's clinical response                                             |
| 2020     |         |     |                                         | 8/12  | 35.10±13.00   | lactic acid 5% mouth wash (20)                                                                                | three times daily before meals and leave the solution in their mouth for 3-5 minutes, then spit it. They used the mouth wash for 1-2 weeks according to patient's clinical response |
| Kia      | Iran    | RCT | NA                                      | 20/9  | 43.72±9.62    | 5% curcumin (29)                                                                                              | three times a day for 10 days                                                                                                                                                       |
| 2020     |         |     |                                         | 16/13 | 45.05±8.90    | 0.1% triamcinolone (29)                                                                                       | three times a day for 10 days                                                                                                                                                       |
| Owlia    | Iran    | RCT | acute-onset aphthae with diameter ≥5 mm | 12/13 | 29.92 (15-45) | Penicillin (25)                                                                                               | four times a day for a week                                                                                                                                                         |
| 2020     |         |     |                                         | 14/11 | 31.32 (15-45) | placebo (25)                                                                                                  | four times a day for a week                                                                                                                                                         |
| Seyyedi  | Iran    | RCT | Minor aphthous stomatitis               | 2/13  | 34.54±14.93   | pulsed carbon dioxide laser (5)                                                                               | NA                                                                                                                                                                                  |
| 2020     |         |     |                                         |       |               | continuous carbon dioxide laser (5)                                                                           | NA                                                                                                                                                                                  |
|          |         |     |                                         |       |               | 0.1% triamcinolone acetonide (5)                                                                              | NA                                                                                                                                                                                  |
| Raman    | India   | RCT | minor aphthous ulcer                    | 11/19 | 21.3          | curcumin (30)                                                                                                 | three times daily until your pain completely                                                                                                                                        |

|            |                 |     |                                        |       |             |                                                                |                                                                                                      |
|------------|-----------------|-----|----------------------------------------|-------|-------------|----------------------------------------------------------------|------------------------------------------------------------------------------------------------------|
| 2020       |                 |     |                                        | 8/22  | 21.6        | triamcinolone acetone (30)                                     | subsidies<br>three times daily until your pain completely<br>subsidies                               |
| Bardellini | Italia          | RCT | MIRAS                                  | 12/18 | 8.9±2.2     | diode laser (30)                                               | Laser therapy was administered on day 1 (T0) for<br>three consecutive days                           |
| 2020       |                 |     |                                        | 11/19 | 8.4±2.1     | Sham treatment (30)                                            | Laser therapy was administered on day 1 (T0) for<br>three consecutive days                           |
| Nirmala    | India           | RCT | NA                                     | NA    | NA          | Bacillus Clausii probiotic for local application (20)          | twice daily for 1 week                                                                               |
| 2019       |                 |     |                                        |       |             | triamcinolone paste for local application (20)                 | twice daily                                                                                          |
| Soliman    | Egypt           | RCT | MIRAS                                  | 6/4   | 30.1±6.9    | diode laser treatment (10)                                     | performed in the first visit only                                                                    |
| 2019       |                 |     |                                        | 7/3   | 28.1±5.8    | placebo (10)                                                   | rinse a diluted sodium bicarbonate oral 4<br>times/day                                               |
| Tavangar   | Iran            | RCT | minor RAS                              | 24/36 | 18-50       | triamcinolone muco-adhesive paste (20)                         | three times a day, until the ulcer healed<br>completely                                              |
| 2019       |                 |     |                                        |       |             | Placebo (20)                                                   | three times a day, until the ulcer healed<br>completely                                              |
| Halboub    | Saudi<br>Arabia | RCT | Minor:51 Major:7                       | 16/22 | 30.13±16.62 | N-acetyl cysteine (NAC) (200 mg dissolved in<br>water, n = 38) | mouthwashes for 30 seconds                                                                           |
| 2019       |                 |     |                                        | 9/11  | 25.50±6.86  | 0.12% chlorhexidine digluconate (CHX, n = 20)                  | mouthwashes for 30 seconds                                                                           |
| El-Wakeel  | Egypt           | RCT | minor<br>aphthous<br>ulcers            | 19/21 | 28.9        | insulin-liposomal gel (40)                                     | once daily for 6 days                                                                                |
| 2019       |                 |     |                                        | 20/20 |             | placebo gel (40)                                               | once daily for 6 days                                                                                |
| Rahmani    | Iran            | RCT | minor recurrent<br>aphthous stomatitis | 8/12  | 35.15±9.8   | 0.5% Chitosan mouthwash (20)                                   | keep 5 cc mouthwash for 4 minutes in the mouth<br>and then spit it out 3 times a day after each meal |
| 2018       |                 |     |                                        |       |             | 0.5% Triamcinolone mouthwash (20)                              | keep 5 cc mouthwash for 4 minutes in the mouth<br>and then spit it out 3 times a day after each meal |

|                    |        |     |                 |          |       |             |                                                      |                                                                                                                                                                         |
|--------------------|--------|-----|-----------------|----------|-------|-------------|------------------------------------------------------|-------------------------------------------------------------------------------------------------------------------------------------------------------------------------|
| Sharma             | India  | RCT | minor<br>ulcers | aphthous | NA    | 26.5        | 0.1%Triamcinolone acetonide (10)                     | 4 times a day, preferably following oral hygiene after breakfast, lunch, dinner and at bedtime                                                                          |
| 2018               |        |     |                 |          |       | 26.7        | 20% Benzocaine gel (10)                              | 4 times a day, preferably following oral hygiene after breakfast, lunch, dinner and at bedtime                                                                          |
|                    |        |     |                 |          |       | 28.7        | 100 mg Doxycycline hyclate (10)                      | The powdered doxycycline hyclate was mixed with denture adhesive and normal saline with 20:2:1 ratio and was directly placed over the ulcer using a plastic instrument  |
|                    |        |     |                 |          |       | 28.4        | placebo (10)                                         | 4 times a day, preferably following oral hygiene after breakfast, lunch, dinner and at bedtime                                                                          |
| Ofluoglu           | Turkey | RCT | NA              |          | 78/82 | 38.76±13.03 | TA pomade contains 0.1% triamcinolon acetonide (53)  | rinse their mouth with tap water prior to the administration of the agent and apply the agent to the ulcer 4 times per day (after meals and before bed time) for 7 days |
| 2017               |        |     |                 |          |       |             | TGO gel contains 92.67% triester glycerol oxide (56) | rinse their mouth with tap water prior to the administration of the agent and apply the agent to the ulcer 4 times per day (after meals and before bed time) for 7 days |
|                    |        |     |                 |          |       |             | placebo gel (51)                                     | rinse their mouth with tap water prior to the administration of the agent and apply the agent to the ulcer 4 times per day (after meals and before bed time) for 7 days |
| Zeini              | Egypt  | RCT | minor RAS       |          | 8/6   | 34.6        | CO2 laser (14)                                       | single session treatment                                                                                                                                                |
| 2017               |        |     |                 |          | 4/6   | 30.2        | placebo (10)                                         | sham laser                                                                                                                                                              |
| Rodríguez-Archilla | Spain  | RCT | minor           |          | 8/17  | 33±11       | cauterization with silver nitrate (25)               | single treatment                                                                                                                                                        |

|        |        |     |                       |       |            |                                                         |                                                |                                                                                                                                                                  |                                                                                                                                                                  |
|--------|--------|-----|-----------------------|-------|------------|---------------------------------------------------------|------------------------------------------------|------------------------------------------------------------------------------------------------------------------------------------------------------------------|------------------------------------------------------------------------------------------------------------------------------------------------------------------|
| 2017   |        |     |                       |       | 8/17       | 31±14                                                   | propolis (25)                                  |                                                                                                                                                                  | Spray 3 times a day and avoid application after eating or drinking                                                                                               |
|        |        |     |                       |       | 11/14      | 30±11                                                   | placebo (25)                                   |                                                                                                                                                                  | Spray 3 times a day and avoid application after eating or drinking                                                                                               |
| Pandya | India  | RCT | minor aphthous ulcers | 14/6  | 25.1±13.79 | a gel containing approximately 2% quercetin (20)        |                                                | applied topically on the ulcers TID for total of 7 days and were restrained from eating, drinking, or rinsing the mouth for 30 minutes after each application    |                                                                                                                                                                  |
| 2017   |        |     |                       |       | 12/8       | 27±13.29                                                | 0.15% benzydamine hydrochloride mouthwash (20) |                                                                                                                                                                  | rinsed for 30 seconds and then expelled out, approximately 15 minutes before meals TID for 7 days                                                                |
| Yilmaz | Turkey | RCT | minor RAS             | 24/16 | 26±9.2     | Er,Cr:YSGG laser (40)                                   |                                                | only at the first visit                                                                                                                                          |                                                                                                                                                                  |
| 2017   |        |     |                       |       |            |                                                         | placebo (40)                                   |                                                                                                                                                                  | only at the first visit                                                                                                                                          |
| Nasry  | Egypt  | RCT | NA                    | 23/37 | 28.5       | herbal combination of Acacia nilotica and Licorice (15) |                                                | apply the medication on the lesion q.i.d. after drying it with a small sterile cotton pad and refrain from eating at least for 30 min after the drug application |                                                                                                                                                                  |
| 2016   |        |     |                       |       |            |                                                         | Amlexanox 5% (15)                              |                                                                                                                                                                  | apply the medication on the lesion q.i.d. after drying it with a small sterile cotton pad and refrain from eating at least for 30 min after the drug application |
|        |        |     |                       |       |            |                                                         | diode laser (15)                               |                                                                                                                                                                  | single treatment, 2nd or a 3rd laser pass was occasionally needed to decrease the pain                                                                           |
|        |        |     |                       |       |            |                                                         | placebo adhesive tablet (15)                   |                                                                                                                                                                  | apply the medication on the lesion q.i.d. after drying it with a small sterile cotton pad and refrain from eating at least for 30 min after the                  |



|                |                 |     |                   |            |       |             |                                                           | drug application                                                                                                                                                                                    |
|----------------|-----------------|-----|-------------------|------------|-------|-------------|-----------------------------------------------------------|-----------------------------------------------------------------------------------------------------------------------------------------------------------------------------------------------------|
| Abbasi         | Iran            | RCT | minor<br>ulcers   | aphthous   | 18/22 | 36.2±3.36   | Adcortyl 0.1% (20)                                        | four times daily for 7 days                                                                                                                                                                         |
| 2016           |                 |     |                   |            |       |             | 5% Amlexanox (20)                                         | four times daily for 7 days                                                                                                                                                                         |
| Andishe Tadbir | Iran            | RCT | minor<br>stomata  | aphthous   | 5/10  | 28.93±7.29  | placebo (Orabase alone) (15)                              | four times a day, after eating and performing oral hygiene and to continue till complete resolution                                                                                                 |
| 2015           |                 |     |                   |            | 9/5   | 30.86±4.79  | triamcinolone in Orabase (14)                             | four times a day, after eating and performing oral hygiene and to continue till complete resolution                                                                                                 |
| Raeesi         | Iran            | RCT | major<br>excluded | ulcer were | 2/18  | 26.8        | paste containing 5% of licorice extract (20)              | Three times after meal and one time before sleeping for 5 days                                                                                                                                      |
| 2015           |                 |     |                   |            | 4/16  | 24.45       | paste without licorice extract (20)                       | Three times after meal and one time before sleeping for 5 days                                                                                                                                      |
| Aggarwal       | India           | RCT | NA                |            | 18/12 | NA          | diode laser (30)                                          | single treatment                                                                                                                                                                                    |
| 2014           |                 |     |                   |            |       |             | Sham treatment (30)                                       | single treatment                                                                                                                                                                                    |
| Mansour        | Saudi<br>Arabia | RCT | minor RAS         |            | 38/52 | 31.7±8.4    | mucoadhesive gel with aloe vera as active ingredient (30) | apply the drug to the ulcer four times a day (after meals and before bedtime) for 5 days using finger or cotton tip applicator and to refrain from eating and drinking for 30 min after application |
| 2014           |                 |     |                   |            |       |             | plain mucoadhesive gel (placebo) (30)                     | apply the drug to the ulcer four times a day (after meals and before bedtime) for 5 days using finger or cotton tip applicator and to refrain from eating and drinking for 30 min after application |
| Deshmukh       | India           | RCT | minor RAS         |            | 31/29 | 32.51±11.80 | Curcumin gel (30)                                         | apply the gel three times a day on each ulcer after meals and not to consume food or water for half an hour after application of the gel                                                            |
| 2014           |                 |     |                   |            |       |             | Triamcinolone Acetonide gel (30)                          | apply the gel three times a day on each ulcer                                                                                                                                                       |

|                   |                         |     |                                          |        |                                   |                                      |                                                                                                                                                                          |                                                                                            |
|-------------------|-------------------------|-----|------------------------------------------|--------|-----------------------------------|--------------------------------------|--------------------------------------------------------------------------------------------------------------------------------------------------------------------------|--------------------------------------------------------------------------------------------|
|                   |                         |     |                                          |        |                                   |                                      |                                                                                                                                                                          | after meals and not to consume food or water for half an hour after application of the gel |
| El-Haddad         | Kingdom of Saudi Arabia | RCT | minor RAS                                | 54/126 | <20y: 7<br>20-29y: 41<br>≥30y: 19 | topical commercial honey (67)        | three times a day (after meals) for 8 days                                                                                                                               |                                                                                            |
| 2014              |                         |     |                                          |        | <20y: 6<br>20-29y: 21<br>≥30y: 30 | 0.1% triamcinolone acetonide (57)    | three times a day (after meals) for 8 days                                                                                                                               |                                                                                            |
|                   |                         |     |                                          |        | <20y: 8<br>20-29y: 31<br>≥30y: 17 | Orabase (56)                         | three times a day (after meals) for 8 days                                                                                                                               |                                                                                            |
| Albrektson        | Sweden                  | RCT | minor RAS                                | 5/15   | 22.5±16.7                         | low-level laser therapy (LLLT) (20)  | 3 occasions, with a 1-day interval.                                                                                                                                      |                                                                                            |
| 2014              |                         |     |                                          | 11/9   | 27.5±25.0                         | Placebo without any laser power (20) | 3 occasions, with a 1-day interval.                                                                                                                                      |                                                                                            |
| Soylu             | Turkey                  | RCT | NA                                       | 19/16  | 25.1 15-40                        | Silver nitrate sticks (35)           | r nitrate stick was gently held over the ulcer for a few seconds until the lesion turned to white, after the procedure, the oral cavity was rinsed with water for 5 min. |                                                                                            |
| 2014              |                         |     |                                          | 30/17  | 23.5 16-35                        | placebo sticks (30)                  | the empty sticks were held over the ulcer, after the procedure, the oral cavity was rinsed with water for 5 min.                                                         |                                                                                            |
| Soylu and Okuyucu | Turkey                  | RCT | recurrent aphthous ulcers less than 1 cm | 17/18  | 38.31±5.40                        | Sucralfate suspension (35)           | 4 times a day 5 mL as an oral rinse for 1 to 2 minutes after routine mouth care and before sleep for one week                                                            |                                                                                            |
| 2014              |                         |     |                                          | 19/16  | 38.97±5.14                        | chlorhexidine oral rinse (35)        | 4 times a day as an oral rinse for 1 to 2 minutes after routine mouth care and before sleep for one week                                                                 |                                                                                            |

|                            |          |     |                |                    |                              |                                                                                                   |                                                                                                                                                                                                                                                                                                |
|----------------------------|----------|-----|----------------|--------------------|------------------------------|---------------------------------------------------------------------------------------------------|------------------------------------------------------------------------------------------------------------------------------------------------------------------------------------------------------------------------------------------------------------------------------------------------|
| Bhat<br><br>2013           | India    | RCT | less than 5 mm | 37/13<br><br>26/14 | 27                           | 5% Lexanox oral paste (50)<br><br>placebo paste (50)                                              | 4 times a day, squeeze out approximately ¼ inch (0.5 cm) of the paste from the tube on a clean fingertip and apply to the site of the ulcer<br><br>4 times a day, squeeze out approximately ¼ inch (0.5 cm) of the paste from the tube on a clean fingertip and apply to the site of the ulcer |
| Bhalang<br>2013            | Thailand | RCT | MIRAU          | NA                 | NA                           | 0.1% triamcinolone acetonide (60)<br>0.5% acemannan extracted from Aloe vera (60)<br>placebo (60) | 3 times/day for 7 days<br>3 times/day for 7 days<br>3 times/day for 7 days                                                                                                                                                                                                                     |
| Halim<br>2013              | Malaysia | RCT | size < 10 mm   | NA                 | NA                           | turmeric (10)<br>triamcinolone (10)                                                               | twice a day for five consecutive days<br>twice a day for five consecutive days                                                                                                                                                                                                                 |
| Jiang and Yang<br><br>2013 | China    | RCT | MiRAS          | 11/24<br><br>11/19 | 33.03±3.28<br><br>34.50±4.85 | Diosmectite paste (35)<br><br>placebo paste (30)                                                  | apply the paste to the appointed ulcer 4 times per day (after meals and before bedtime) for 5 days (day 1 to day 5)<br><br>apply the paste to the appointed ulcer 4 times per day (after meals and before bedtime) for 5 days (day 1 to day 5)                                                 |
| Jiang and Zhu<br>2013      | China    | RCT | MiRAS          | 14/28<br>10/32     | 30.86±7.53<br>31.19±6.00     | gelatin containing berberine (42)<br>vehicle (42)                                                 | 4 times per day for 5 days<br>4 times per day for 5 days                                                                                                                                                                                                                                       |
| Prasad<br>2013             | India    | RCT | miRAU          | NA                 | 27.48±6.82                   | CO2 laser (25)<br>placebo (25)                                                                    | single<br>single                                                                                                                                                                                                                                                                               |
| Vijayabala<br><br>2013     | India    | RCT | minor RAS      | 30/20              | 25.14 16-65                  | powdered doxycycline hyclate tablet topically<br>whereas (25)<br>powdered placebo tablet (25)     | A single application of the medicament or placebo was done during the patient's initial visit<br><br>A single application of the medicament or placebo was done during the patient's initial visit                                                                                             |
| Sattayut                   | Thailand | RCT | minor RAS      | NA                 | 21 19-23                     | CO2 laser (7)                                                                                     | single, 5 seconds                                                                                                                                                                                                                                                                              |

|            |       |     |                                     |       |             |                                                  |                                                                                                          |
|------------|-------|-----|-------------------------------------|-------|-------------|--------------------------------------------------|----------------------------------------------------------------------------------------------------------|
| 2013       |       |     |                                     |       | 23 18-39    | sham laser (7)                                   | single, 5 seconds                                                                                        |
| Jiang      | China | RCT | 10 mm- 2 mm                         | 36/62 | 37          | 5 mg allicin adhesive tablets (48)               | apply 1 adhesive tablet to the appointed ulcer 4 times a day (after meals and before bedtime) for 5 days |
| 2012       |       |     |                                     |       |             | vehicle only (48)                                | apply 1 adhesive tablet to the appointed ulcer 4 times a day (after meals and before bedtime) for 5 days |
| Manifar    | Iran  | RCT | not greater than 6 mm               | 15/13 | 36.1±9.6    | 2% curcumin (28)                                 | twice per day for a two week                                                                             |
| 2012       |       |     |                                     | 17/12 | 33.3 ±9.5   | placebo gel (29)                                 | twice per day for a two week                                                                             |
| Liu        | China | RCT | <10 mm                              | 50/70 | 32.29±11.25 | dexamethasone ointment (120)                     | 3 times a day (after meals) for 5 days                                                                   |
| 2012       |       |     |                                     | 52/68 | 31.67±12.04 | placebo (120)                                    | 3 times a day (after meals) for 5 days                                                                   |
| Babae      | Iran  | RCT | minor RAS                           | 10/10 | 27.95±7.96  | Aloe vera gel (20)                               | thraee-times a day for at least ten days                                                                 |
| 2012       |       |     |                                     | 8/12  | 29.25±7.48  | placebo (20)                                     | thraee-times a day for at least ten days                                                                 |
| Zand       | Iran  | RCT | minor aphthous ulcers               | 1/9   | 35.6 22-56  | non-ablative CO2 laser therapy (NACLT) (10)      | single                                                                                                   |
| 2012       |       |     |                                     |       |             | placebo (10)                                     | single                                                                                                   |
| Galal      | Egypt | RCT | NA                                  | NA    | 18-35       | Licorice (10)                                    | four times on the lesions                                                                                |
| 2012       |       |     |                                     |       |             | control (10)                                     | four times on the lesions                                                                                |
| Trinchieri | Italy | RCT | minor aphthous stomatitis           | 7/8   | 8-36        | lozenge containing Lactobacillus brevis CD2 (15) | 4 times daily for a total period of 7 days                                                               |
| 2011       |       |     |                                     | 8/7   | 7-35        | placebo (15)                                     | 4 times daily for a total period of 7 days                                                               |
| Meng       | China | RCT | Minor Recurrent aphthous ulceration | 44/64 | 29.82±10.44 | amlexanox adhesive pellicles (108)               | 4 times a day (after meals and before bedtime) for 5 days                                                |
| 2009       |       |     |                                     | 37/71 | 30.18±11.06 | placebo (105)                                    | 4 times a day (after meals and before bedtime) for 5 days                                                |

|                     |          |     |                                    |                |                          |                                                                                               |                                                                                                                                                                                                                                                                                                                                                                |
|---------------------|----------|-----|------------------------------------|----------------|--------------------------|-----------------------------------------------------------------------------------------------|----------------------------------------------------------------------------------------------------------------------------------------------------------------------------------------------------------------------------------------------------------------------------------------------------------------------------------------------------------------|
| Tezel<br>2009       | Turkey   | RCT | NA                                 | 4/6<br>3/7     | 29.7±7.4<br>34.3±7.7     | (triamcinolone acetonide 0.1%<br>Nd:YAG laser                                                 | three times a day for 1 wk (10)<br>single (10)                                                                                                                                                                                                                                                                                                                 |
| Skulason<br>2009    | Iceland  | RCT | minor recurrent oral<br>ulceration | 7/18<br>10/14  | NA                       | Doxy-Gel, a gel containing a low dose of<br>doxycycline (25)<br>placebo (24)                  | four times a day<br>four times a day                                                                                                                                                                                                                                                                                                                           |
| Zand<br>2009        | Iran     | RCT | miRAS                              | 2/13           | 37.9±10.9                | CO2 laser (15)<br>placebo (15)                                                                | single<br>single                                                                                                                                                                                                                                                                                                                                               |
| Moghadamnia<br>2009 | Iran     | RCT | minor RAS                          | 10/5           | 26.27±4.28               | bioadhesive with licorice (15)<br>bioadhesive without licorice (15)                           | q.i.d. for 5 days<br>q.i.d. for 5 days                                                                                                                                                                                                                                                                                                                         |
| Gorsky<br>2008      | Israel   | RCT | RAS minor                          | 9/9<br>4/11    | 37 (16-66)<br>38 (17-71) | 0.2% aqueous solution of minocycline as a<br>mouthwash (18)<br>aqueous placebo mouthwash (15) | four times a day, avoiding any food or drink for<br>1 hour after rinsing. Therapy continued up to 10<br>days following the onset of the lesion or until<br>resolution of pain<br>four times a day, avoiding any food or drink for<br>1 hour after rinsing. Therapy continued up to 10<br>days following the onset of the lesion or until<br>resolution of pain |
| Rodríguez<br>2007   | Colombia | RCT | NA                                 | 14/34<br>30/18 | 30.6±9.0<br>34.5±13.7    | 0.05% clobetasol propionate oral paste (48)<br>5% amlexanox oral paste (48)                   | s four times per day for 5 days<br>s four times per day for 5 days                                                                                                                                                                                                                                                                                             |
| Arikan<br>2006      | Turkey   | RCT | NA                                 | 11/9           | 30.9 (18-47)             | cryotherapy (20)<br>hydrogel (20)                                                             | NA<br>NA                                                                                                                                                                                                                                                                                                                                                       |
| Liu<br>2006         | China    | RCT | minor aphthous<br>ulcerations      | 101/111        | 34                       | amlexanox tablets (104)<br>vehicle tablets (108)                                              | 4 times a day (after meals and before bedtime)<br>for 5 days<br>4 times a day (after meals and before bedtime)<br>for 5 days                                                                                                                                                                                                                                   |
| Garnick             | USA      | RCT | aphthous stomatitis                | 35 (19-56)     | NA                       | Carrier gel (4)                                                                               | NA                                                                                                                                                                                                                                                                                                                                                             |

|             |         |     |                           |       |                                  |                                     |                                                                                                                                           |
|-------------|---------|-----|---------------------------|-------|----------------------------------|-------------------------------------|-------------------------------------------------------------------------------------------------------------------------------------------|
| minor       |         |     |                           |       |                                  |                                     |                                                                                                                                           |
| 1998        |         |     |                           |       |                                  | Aloe vera (3)                       | NA                                                                                                                                        |
| Khandwala 1 | USA     | RCT | minor ulcers              | NA    | NA                               | Vehicle (512)                       | four times a day until ulcers healed or for the duration of the study                                                                     |
| 1997        |         |     |                           |       |                                  | 5% Amlexanox (579)                  | four times a day until ulcers healed or for the duration of the study                                                                     |
| Ylikontiola | Finland | RCT | minor aphthae             | 4/27  | woman: 38 (23-63) man:32 (28-45) | doxymycine (15)                     | Medications were covered by isobutyl cyanoacrylate (Iso-Dent). Application was made only once during the recurrent aphthous ulcer episode |
| 1997        |         |     |                           |       |                                  | calcii gluconase as placebo (16)    | Medications were covered by isobutyl cyanoacrylate (Iso-Dent). Application was made only once during the recurrent aphthous ulcer episode |
| Greer Jr    | USA     | RCT | NA                        | NA    | 18-70                            | 5% amlexanox paste (18)             | twice daily for 3 days and once on day 4                                                                                                  |
| 1993        |         |     |                           |       |                                  | vehicle paste (14)                  | twice daily for 3 days and once on day 4                                                                                                  |
| Miles       | USA     | RCT | NA                        | NA    | NA                               | 0.025% triamcinolone acetonide (6)  | The patient returned to the clinic each time a new lesion appeared for reapplication of their assigned treatment                          |
| 1993        |         |     |                           |       |                                  | 0.12% chlorhexidine digluconate (6) | The patient returned to the clinic each time a new lesion appeared for reapplication of their assigned treatment                          |
| Taylor      | UK      | RCT | minor aphthous ulceration | 7/11  | 32.6 (20-57)                     | PGE2 gel (18)                       | twice daily for 10 days or until healing                                                                                                  |
| 1993        |         |     |                           | 6/9   |                                  | placebo (15)                        | twice daily for 10 days or until healing                                                                                                  |
| Hunter      | UK      | RCT | minor aphthous            | 12/29 | 27.4 (17-61)                     | 0.2% chlorhexidine gluconate (38)   | 3 times daily for 6 weeks                                                                                                                 |

|            |    |     |                                      |      |       |              |                                                        |                                       |
|------------|----|-----|--------------------------------------|------|-------|--------------|--------------------------------------------------------|---------------------------------------|
| ulceration |    |     |                                      |      |       |              |                                                        |                                       |
| 1987       |    |     |                                      |      |       |              | placebo mouthwash (38)                                 | 3 times daily for 6 weeks             |
| Matthews   | UK | RCT | minor RAS                            |      | NA    | NA           | Benzylamine hydrochloride 0.15% mouthwash (18)         | 2 minutes every 4 hours for 3 mouths  |
| 1987       |    |     |                                      |      |       |              | 0.2% aqueous chlorhexidine gluconate mouthwash (18)    | 2 minutes every 4 hours for 3 mouths  |
|            |    |     |                                      |      |       |              | Placebo (18)                                           | 2 minutes every 4 hours for 3 mouths  |
| Yeoman     | UK | RCT | minor aphthous ulcers                | 9/12 |       | 35 (17-63)   | betamethasone valerate aerosol (10)                    | NA                                    |
| 1978       |    |     |                                      |      |       |              | placebo aerosol (10)                                   | NA                                    |
| Addy       | UK | RCT | NA                                   |      | NA    | NA           | Chlorhexidine gel (20)                                 | 3 times a day after meals for 35 days |
| 1976       |    |     |                                      |      |       |              | Placebo gel (20)                                       | 3 times a day after meals for 35 days |
| Addy       | UK | RCT | NA                                   |      | 11/15 | 17-60        | Asringent (Zine Sulphate and Zine Chloride 0.5ml) (12) | 3 times daily after meals for 5 weeks |
| 1974       |    |     |                                      |      |       |              | Control (12)                                           | 3 times daily after meals for 5 weeks |
| Browne     | UK | RCT | severe recurrent aphthous stomatitis | 9/17 |       | 29.6 (10-53) | Orabase (26)                                           | three times a day                     |
| 1968       |    |     |                                      |      |       |              | 0.1% triamcinolone acetonide in orabase (26)           | three times a day                     |

**Table S7 Outcomes of included studies**

| Author Year            | Clinical response assessment | Symptom assessment |                                                                                                  | Adverse effect | Hematologic values | Relapse                                                                        |
|------------------------|------------------------------|--------------------|--------------------------------------------------------------------------------------------------|----------------|--------------------|--------------------------------------------------------------------------------|
|                        | size/healing time            | VAS/NRS/0-10       |                                                                                                  |                |                    |                                                                                |
| Huo<br>2021            | healing time                 | VAS                | NA                                                                                               |                | NA                 | NA                                                                             |
| Aggour (audIt)<br>2021 | Size                         | VAS                | NA                                                                                               |                | NA                 | Outbreak frequency/6 months<br>Probiotics: 3.33 (0.64)<br>Placebo: 3.65 (0.32) |
| Aggour (child)<br>2021 | Size                         | VAS                | NA                                                                                               |                | NA                 | Outbreak frequency/6 months<br>Probiotics: 2.65 (0.54)<br>Placebo: 3.65 (0.62) |
| Shi<br>2020            | healing time                 | NA                 | NA                                                                                               |                | NA                 | NA                                                                             |
| Kavita<br>2020         | Size                         | VAS                | NA                                                                                               |                | NA                 | NA                                                                             |
| Shao<br>2020           | Size                         | VAS                | No adverse effects were observed during the study                                                |                | NA                 | NA                                                                             |
| Pedersen<br>2020       | NA                           | VAS                | No side effects or adverse events were reported by the patients during the intervention period   |                | NA                 | NA                                                                             |
| Ghorbani<br>2020       | Size                         | VAS                | No adverse effect was observed in the two groups during the study                                |                | NA                 | NA                                                                             |
| Ibrahim<br>2020        | Size and healing time        | NA                 | No side effects were reported in both groups                                                     |                | NA                 | NA                                                                             |
| Kia<br>2020            | Size                         | VAS                | No burning sensation, the abnormal change in the mucosa, or taste sense malfunction was observed |                | NA                 | NA                                                                             |



|                    |                       |     |                                                                                                   |    |    |
|--------------------|-----------------------|-----|---------------------------------------------------------------------------------------------------|----|----|
| Owlia<br>2020      | Size and healing time | NA  | three patients just complained of minor burning sensation after application of drug               | NA | NA |
| Seyyedi<br>2020    | Size                  | NA  | NA                                                                                                | NA | NA |
| Raman<br>2020      | Size and healing time | NA  | There were no major adverse effects reported in both the groups during the study period           | NA | NA |
| Bardellini<br>2020 | Size                  | VAS | NA                                                                                                | NA | NA |
| Nirmala<br>2019    | Size                  | NA  | NA                                                                                                | NA | NA |
| Soliman<br>2019    | Size                  | VAS | NA                                                                                                | NA | NA |
| Tavangar<br>2019   | Size and healing time | VAS | NA                                                                                                |    | NA |
| Halboub<br>2019    | Size and healing time | VAS | NA                                                                                                | NA | NA |
| El-Wakeel<br>2019  | healing time          | VAS | NA                                                                                                | NA | NA |
| Rahmani<br>2018    | Size and healing time | VAS | one patient (5%) felt mild throat sore after applying Chitosan mouthwash and bad taste 20 minutes | NA | NA |
| Sharma<br>2018     | Size                  | VAS | None of the patients reported any allergy to any therapy                                          | NA | NA |
| Ofluoglu<br>2017   | Size                  | VAS | All patients tolerated the agents and no side effect were reported during the study               | NA | NA |
| Zeini<br>2017      | healing time          | VAS | NA                                                                                                | NA | NA |

|                            |                       |     |                                                                                                         |    |    |
|----------------------------|-----------------------|-----|---------------------------------------------------------------------------------------------------------|----|----|
| Rodríguez-Archilla<br>2017 | healing time          | NA  | No patient reported adverse effects related to the treatment received                                   | NA | NA |
| Pandya<br>2017             | Size                  | VAS | NA                                                                                                      | NA | NA |
| Yilmaz<br>2017             | NA                    | VAS | No complications or adverse reactions were observed                                                     | NA | NA |
| Nasry<br>2016              | Size                  | VAS | NA                                                                                                      | NA | NA |
| Abbasi<br>2016             | Size                  | VAS | NA                                                                                                      | NA | NA |
| Andishe Tadbir<br>2015     | Size and healing time | VAS | NA                                                                                                      | NA | NA |
| Raeesi<br>2015             | Size and healing time | VAS | without side effect                                                                                     | NA | NA |
| Aggarwal<br>2014           | healing time          | NA  | NA                                                                                                      | NA | NA |
| Mansour<br>2014            | Size                  | VAS | No adverse effects were reported regarding all used mucoadhesive gels                                   | NA | NA |
| Deshmukh<br>2014           | Size and healing time | VAS | No patient suffered from any allergic reaction to the gels used in the study for treatment of minor RAS | NA | NA |
| El-Haddad<br>2014          | Size and healing time | VAS | No systemic side effects                                                                                | NA | NA |
| Albrektson<br>2014         | NA                    | VAS | Twenty patients in each group completed the study, with no reported adverse events                      | NA | NA |
| Soylu<br>2014              | healing time          | VAS | No side effects were recorded in either of the groups.                                                  | NA | NA |

|                           |              |            |                                                                                                                                                                                                                                                                                                                                                                                                                                                                                                                                                                                           |                                                                                                                      |    |
|---------------------------|--------------|------------|-------------------------------------------------------------------------------------------------------------------------------------------------------------------------------------------------------------------------------------------------------------------------------------------------------------------------------------------------------------------------------------------------------------------------------------------------------------------------------------------------------------------------------------------------------------------------------------------|----------------------------------------------------------------------------------------------------------------------|----|
| Soylu and Okuyucu<br>2014 | healing time | VAS        | No side effects were recorded in either of the groups                                                                                                                                                                                                                                                                                                                                                                                                                                                                                                                                     | NA                                                                                                                   | NA |
| Bhat<br>2013              | Size         | VAS        | 8 patients belonging to the amlexanox group who complained of adverse events during the study. 3 patients complained of a transient "stinging" at the application site, which was considered to be mild in severity and probably related to the studied medications. 2 patients complained of a metallic taste in the oral cavity soon after application of the paste. 3 other patients complained of a "cooling" sensation at the application site following which they felt slight discomfort for a few minutes. None of these 8 cases discontinued the trial due to the adverse events | NA                                                                                                                   | NA |
| Bhalang<br>2013           | Size         | VAS        | No subjects exhibited allergic reactions or side-effects to acemannan                                                                                                                                                                                                                                                                                                                                                                                                                                                                                                                     | There were no significant differences between the blood test values before and after 7 days of acemannan application | NA |
| Halim<br>2013             | Size         | VAS        | NA                                                                                                                                                                                                                                                                                                                                                                                                                                                                                                                                                                                        | NA                                                                                                                   | NA |
| Jiang and Yang<br>2013    | Size         | VAS        | no obvious adverse side effects                                                                                                                                                                                                                                                                                                                                                                                                                                                                                                                                                           | NA                                                                                                                   | NA |
| Jiang and Zhu<br>2013     | Size         | VAS        | without obvious side effects                                                                                                                                                                                                                                                                                                                                                                                                                                                                                                                                                              | NA                                                                                                                   | NA |
| Prasad<br>2013            | healing time | 0-10 score | NA                                                                                                                                                                                                                                                                                                                                                                                                                                                                                                                                                                                        | NA                                                                                                                   | NA |
| Vijayabala<br>2013        | healing time | VAS        | 8 report transient bitter sensation                                                                                                                                                                                                                                                                                                                                                                                                                                                                                                                                                       | NA                                                                                                                   | NA |
| Sattayut                  | Size         | VAS        | NA                                                                                                                                                                                                                                                                                                                                                                                                                                                                                                                                                                                        | NA                                                                                                                   | NA |

|                    |                       |            |                                                                                                      |                                                                                                         |    |
|--------------------|-----------------------|------------|------------------------------------------------------------------------------------------------------|---------------------------------------------------------------------------------------------------------|----|
| 2013               |                       |            |                                                                                                      |                                                                                                         |    |
| Jiang<br>2012      | Size                  | VAS        | No minor or major adverse side effects                                                               | None of the hematologic values at day 6 were considered clinically abnormal                             | NA |
| Manifar<br>2012    | Size                  | NA         | No adverse drug reaction to a treatment was reported                                                 | NA                                                                                                      | NA |
| Liu<br>2012        | Size and healing time | NRS        | Twelve cases (4 in the treatment group and 8 in the control group) reported slight adverse reactions | the concentration of dexamethasone in the serum after using the dexamethasone ointment was <0.502 ng/mL | NA |
| Babae<br>2012      | Size                  | VAS        | NA                                                                                                   | NA                                                                                                      | NA |
| Zand<br>2012       | healing time          | NA         | The patients reported no warmth in their lesions during laser treatment                              | NA                                                                                                      | NA |
| Galal<br>2012      | Size                  | VAS        | NA                                                                                                   | NA                                                                                                      | NA |
| Trinchieri<br>2011 | Size                  | 0-10 score | complete absence of side effects                                                                     | NA                                                                                                      | NA |
| Meng<br>2009       | Size                  | VAS        | None of the patients in the study was observed or reported to have any adverse reactions             | None of the hematologic values were considered clinically abnormal                                      | NA |
| Tezel<br>2009      | NA                    | VAS        | there were no reported adverse events                                                                | NA                                                                                                      | NA |
| Skulason<br>2009   | NA                    | 0-10 score | One subject reported a short burning sensation from the ulcer after application of the gel           | NA                                                                                                      | NA |
| Zand<br>2009       | NA                    | VAS        | None of the patients reported pain or warmth in their lesions during laser therapy                   | NA                                                                                                      | NA |

|                     |                       |     |                                                                                                                                                                                                   |    |                                                                                  |
|---------------------|-----------------------|-----|---------------------------------------------------------------------------------------------------------------------------------------------------------------------------------------------------|----|----------------------------------------------------------------------------------|
| Moghadamnia<br>2009 | Size and healing time | VAS | NA                                                                                                                                                                                                | NA | NA                                                                               |
| Gorsky<br>2008      | NA                    | VAS | no tooth discoloration or other side effects were reported                                                                                                                                        | NA | NA                                                                               |
| Rodríguez<br>2007   | NA                    | VAS | There were no adverse effects reported in any of the treatment groups by the patients or the examiners                                                                                            | NA | NA                                                                               |
| Arikan<br>2006      | Size                  | NA  | NA                                                                                                                                                                                                | NA | NA                                                                               |
| Liu<br>2006         | Size                  | VAS | There were 2 adverse events reported in the study, One was in the amlexanox group presented as local,transient “stinging”, Another happened in the vehicle-control group as edema of the fingers. | NA | NA                                                                               |
| Garnick<br>1998     | healing time          | VAS | NA                                                                                                                                                                                                | NA | NA                                                                               |
| Khandwala<br>1997   | Size and healing time | VAS | NA                                                                                                                                                                                                | NA | NA                                                                               |
| Ylikontiola<br>1997 | NA                    | VAS | NA                                                                                                                                                                                                | NA | NA                                                                               |
| Greer Jr<br>1993    | Size                  | NA  | None of the patients in the study was observed to have or reported any adverse experience                                                                                                         | NA | NA                                                                               |
| Miles<br>1993       | healing time          | VAS | NA                                                                                                                                                                                                | NA | NA                                                                               |
| Taylor<br>1993      | healing time          | VAS | NA                                                                                                                                                                                                | NA | NA                                                                               |
| Hunter<br>1987      | healing time          | NA  | NA                                                                                                                                                                                                | NA | Total ulcer numbers (6 weeks):<br>Chlorhexidine: 7.54±6.52<br>Placebo: 8.32±5.52 |

|                      |              |    |    |    |                                                                                                                                                   |
|----------------------|--------------|----|----|----|---------------------------------------------------------------------------------------------------------------------------------------------------|
|                      |              |    |    |    | Interval between ulcers (6 weeks):<br>Chlorhexidine: 7.26±8.61<br>Placebo:3.86±2.05                                                               |
| Matthews<br><br>1987 | NA           | NA | NA | NA | No. of new ulcers (3 months)<br>Benzylamine: 7 (2-33)<br>Chlorhexidine: 6.5 (3-20)<br>Placebo: 8 (2-20)                                           |
| Yeoman<br>1978       | healing time | NA | NA | NA | NA                                                                                                                                                |
| Addy<br>1976         | healing time | NA | NA | NA | NA                                                                                                                                                |
| Addy<br>1974         | healing time | NA | NA | NA | NA                                                                                                                                                |
| Browne<br>1968       | healing time | NA | NA | NA | No. of new ulcers (8 months)<br>Placebo: 7.81<br>Triamcinolone acetonide in<br>orabase : 7.00<br>Triamcinolone acetonide in<br>watery base : 6.42 |



[illegible]



|                    |                |    |       |       |   |       |       |   |        |       |   |
|--------------------|----------------|----|-------|-------|---|-------|-------|---|--------|-------|---|
|                    | Placebo        | 51 | 12.61 | 5.86  | 2 | 34.88 | 8.64  | 4 | 65.94  | 8.88  | 6 |
| Zeini              | Laser          | NA |       |       |   |       |       |   |        |       |   |
| 2017               | Placebo        | NA |       |       |   |       |       |   |        |       |   |
| Rodríguez-Archilla | Silver nitrate | NA |       |       |   |       |       |   |        |       |   |
| 2017               | Honey          | NA |       |       |   |       |       |   |        |       |   |
|                    | Placebo        | NA |       |       |   |       |       |   |        |       |   |
| Pandya             | Quercetin      | 20 | 44.25 | 20.96 | 2 | 75.40 | 20.64 | 4 | 95.40  | 21.17 | 7 |
| 2017               | Benzydamine    | 20 | 22.22 | 27.04 | 2 | 53.54 | 25.89 | 4 | 80.13  | 25.69 | 7 |
| Yilmaz             | Laser          | NA |       |       |   |       |       |   |        |       |   |
| 2017               | Placebo        | NA |       |       |   |       |       |   |        |       |   |
| Nasry              | Glycyrrhiza    | 15 | 42.00 | 11.50 | 2 | 63.00 | 20.50 | 5 |        |       |   |
| 2016               | Amlexanox      | 15 | 48.10 | 16.50 | 2 | 77.80 | 28.70 | 5 |        |       |   |
|                    | Laser          | 15 | 52.70 | 19.80 | 2 | 85.10 | 22.00 | 5 |        |       |   |
|                    | Placebo        | 15 | 7.10  | 5.30  | 2 | 10.00 | 7.30  | 5 |        |       |   |
| Abbasi             | Dexamethasone  | 20 | 53.46 | 1.01  | 3 | 80.77 | 22.69 | 5 | 100.00 | 0.00  | 7 |
| 2016               | Amlexanox      | 20 | 48.31 | 44.92 | 3 | 71.69 | 39.08 | 5 | 92.31  | 43.69 | 7 |
| Andishe Tadbir     | Placebo        | 15 | -23.6 | 32.34 | 3 | 61.71 | 31.64 | 6 |        |       |   |
| 2015               | Triamcinolone  | 14 | 78.46 | 38.14 | 3 | 99.41 | 40.51 | 6 |        |       |   |
| Raeesi             | Glycyrrhiza    | 20 | 36.65 | 33.65 | 1 | 96.14 | 37.11 | 3 | 99.95  | 38.26 | 5 |
| 2015               | Placebo        | 20 | 6.87  | 26.74 | 1 | 70.10 | 24.90 | 3 | 91.73  | 26.45 | 5 |
| Aggarwal           | Laser          | NA |       |       |   |       |       |   |        |       |   |
| 2014               | Placebo        | NA |       |       |   |       |       |   |        |       |   |
| Mansour            | Aloe           | 30 | 35.17 | NA    | 4 | 59.48 | 24.64 | 6 |        |       |   |
| 2014               | Placebo        | 30 | 16.80 | NA    | 4 | 31.48 | 31.48 | 6 |        |       |   |
| Deshmukh           | Curcumin       | 30 | 93.03 | 25.49 | 3 | 99.96 | 28.40 | 5 | 100.00 | 0.00  | 7 |
| 2014               | Triamcinolone  | 30 | 91.16 | 37.67 | 3 | 99.90 | 41.12 | 5 | 100.00 | 0.00  | 7 |

|                   |                   |    |        |       |   |        |       |   |       |       |   |        |    |   |        |    |   |        |    |   |
|-------------------|-------------------|----|--------|-------|---|--------|-------|---|-------|-------|---|--------|----|---|--------|----|---|--------|----|---|
| El-Haddad         | Honey             | 67 | 85.38  | NA    | 1 | 98.95  | NA    | 2 | 99.98 | NA    | 3 | 100.00 | NA | 4 | 100.00 | NA | 5 | 100.00 | NA | 6 |
| 2014              | Triamcinolone     | 57 | 24.36  | NA    | 1 | 51.75  | NA    | 2 | 72.33 | NA    | 3 | 90.67  | NA | 4 | 97.24  | NA | 5 | 99.72  | NA | 6 |
|                   | Placebo           | 56 | 23.42  | NA    | 1 | 47.99  | NA    | 2 | 64.35 | NA    | 3 | 78.56  | NA | 4 | 89.50  | NA | 5 | 96.23  | NA | 6 |
|                   |                   |    | 100.00 | NA    | 7 | 100.00 | NA    | 8 |       |       |   |        |    |   |        |    |   |        |    |   |
|                   |                   |    | 99.97  | NA    | 7 | 100.00 | NA    | 8 |       |       |   |        |    |   |        |    |   |        |    |   |
|                   |                   |    | 99.12  | NA    | 7 | 99.95  | NA    | 8 |       |       |   |        |    |   |        |    |   |        |    |   |
| Albrektson        | Laser             | NA |        |       |   |        |       |   |       |       |   |        |    |   |        |    |   |        |    |   |
| 2014              | Placebo           | NA |        |       |   |        |       |   |       |       |   |        |    |   |        |    |   |        |    |   |
| Soylu             | Silver nitrate    | NA |        |       |   |        |       |   |       |       |   |        |    |   |        |    |   |        |    |   |
| 2014              | Placebo           | NA |        |       |   |        |       |   |       |       |   |        |    |   |        |    |   |        |    |   |
| Soylu and Okuyucu | Sucralfate        | NA |        |       |   |        |       |   |       |       |   |        |    |   |        |    |   |        |    |   |
| 2014              | Chlorhexidine     | NA |        |       |   |        |       |   |       |       |   |        |    |   |        |    |   |        |    |   |
| Bhat              | Amlexanox         | 50 | 47.01  | 49.91 | 4 | 93.10  | 53.54 | 6 |       |       |   |        |    |   |        |    |   |        |    |   |
| 2013              | Placebo           | 50 | -27.92 | 37.67 | 4 | 12.05  | 34.99 | 6 |       |       |   |        |    |   |        |    |   |        |    |   |
| Bhalang           | Triamcinolone     | 60 | 10.00  | 10.00 | 2 | 45.00  | 10.34 | 5 | 70.00 | 10.00 | 7 |        |    |   |        |    |   |        |    |   |
| 2013              | Aloe              | 60 | 10.00  | 9.43  | 2 | 30.00  | 8.85  | 5 | 60.00 | 9.08  | 7 |        |    |   |        |    |   |        |    |   |
|                   | Placebo           | 60 | 5.00   | 10.00 | 2 | 10.00  | 10.00 | 5 | 30.00 | 10.00 | 7 |        |    |   |        |    |   |        |    |   |
| Halim             | Curcumin          | 10 | 48.31  | 76.03 | 5 |        |       |   |       |       |   |        |    |   |        |    |   |        |    |   |
| 2013              | Triamcinolone     | 10 | 69.72  | 84.51 | 5 |        |       |   |       |       |   |        |    |   |        |    |   |        |    |   |
| Jiang and Yang    | Diosmectite       | 35 | 1.65   | 20.82 | 2 | 28.81  | 21.40 | 4 | 70.37 | 18.60 | 6 |        |    |   |        |    |   |        |    |   |
| 2013              | Placebo           | 30 | 4.78   | 18.13 | 2 | 27.09  | 18.69 | 4 | 54.98 | 14.22 | 6 |        |    |   |        |    |   |        |    |   |
| Jiang and Zhu     | Berberine gelatin | 42 | 35.63  | 18.28 | 2 | 54.07  | 11.98 | 4 | 70.56 | 11.84 | 6 |        |    |   |        |    |   |        |    |   |
| 2013              | Placebo           | 42 | 14.14  | 20.74 | 2 | 37.66  | 18.33 | 4 | 54.35 | 16.40 | 6 |        |    |   |        |    |   |        |    |   |
| Prasad            | Laser             | NA |        |       |   |        |       |   |       |       |   |        |    |   |        |    |   |        |    |   |
| 2013              | Placebo           | NA |        |       |   |        |       |   |       |       |   |        |    |   |        |    |   |        |    |   |

|            |               |     |        |        |     |        |        |   |        |        |    |       |    |   |       |    |   |
|------------|---------------|-----|--------|--------|-----|--------|--------|---|--------|--------|----|-------|----|---|-------|----|---|
| Vijayabala | Doxycycline   | NA  |        |        |     |        |        |   |        |        |    |       |    |   |       |    |   |
| 2013       | Placebo       | NA  |        |        |     |        |        |   |        |        |    |       |    |   |       |    |   |
| Sattayut   | Laser         | 7   | -18.75 | 216.25 | 1   | -31.25 | 198.75 | 2 | -75.00 | 124.75 | 3  | -12.5 | 86 | 5 | 50.00 | 72 | 7 |
| 2013       | Placebo       | 7   | -31.58 | 47.79  | 1   | -26.32 | 48.63  | 2 | 5.26   | 97.89  | 3  | 47.37 | 78 | 5 | 78.95 | 55 | 7 |
| Jiang      | Allicin       | 48  | 28.20  | 32.68  | 2   | 57.30  | 34.30  | 4 | 72.50  | 38.72  | 6  |       |    |   |       |    |   |
| 2012       | Placebo       | 48  | 9.80   | 31.66  | 2   | 36.50  | 39.66  | 4 | 55.10  | 35.32  | 6  |       |    |   |       |    |   |
| Manifar    | Curcumin      | 28  | 68.58  | 14.99  | 4   | 97.47  | 16.31  | 7 |        |        |    |       |    |   |       |    |   |
| 2012       | Placebo       | 29  | 59.04  | 14.06  | 4   | 95.52  | 13.91  | 7 |        |        |    |       |    |   |       |    |   |
| Liu        | Dexamethasone | 114 | 88.70  | 78.47  | 6±2 |        |        |   |        |        |    |       |    |   |       |    |   |
| 2012       | Placebo       | 117 | 56.64  | 92.06  | 6±2 |        |        |   |        |        |    |       |    |   |       |    |   |
| Babaee     | Aloe          | 20  | 22.91  | 24.50  | 3   | 73.90  | 22.51  | 7 | 100.00 | 0.00   | 10 |       |    |   |       |    |   |
| 2012       | Placebo       | 20  | 37.75  | 28.49  | 3   | 94.92  | 28.49  | 7 | 100.00 | 0.00   | 10 |       |    |   |       |    |   |
| Zand       | Laser         | NA  |        |        |     |        |        |   |        |        |    |       |    |   |       |    |   |
| 2012       | Placebo       | NA  |        |        |     |        |        |   |        |        |    |       |    |   |       |    |   |
| Galal      | Glycyrrhiza   | 10  | 66.25  | 22.31  | 2   | 87.65  | 23.08  | 5 |        |        |    |       |    |   |       |    |   |
| 2012       | Placebo       | 10  | 13.78  | 16.56  | 2   | 19.00  | 16.79  | 5 |        |        |    |       |    |   |       |    |   |
| Trinchieri | Probiotics    | 15  | 99.93  | NA     | 7   |        |        |   |        |        |    |       |    |   |       |    |   |
| 2011       | Placebo       | 15  | 80.11  | NA     | 7   |        |        |   |        |        |    |       |    |   |       |    |   |
| Meng       | Amlexanox     | 108 | 42.08  | 82.22  | 4   | 60.21  | 83.63  | 6 |        |        |    |       |    |   |       |    |   |
| 2009       | Placebo       | 105 | 19.67  | 78.39  | 4   | 41.28  | 91.51  | 6 |        |        |    |       |    |   |       |    |   |
| Tezel      | Triamcinolone | NA  |        |        |     |        |        |   |        |        |    |       |    |   |       |    |   |
| 2009       | Laser         | NA  |        |        |     |        |        |   |        |        |    |       |    |   |       |    |   |
| Skulason   | Doxycycline   | NA  |        |        |     |        |        |   |        |        |    |       |    |   |       |    |   |
| 2009       | Placebo       | NA  |        |        |     |        |        |   |        |        |    |       |    |   |       |    |   |
| Zand       | Laser         | NA  |        |        |     |        |        |   |        |        |    |       |    |   |       |    |   |
| 2009       | Placebo       | NA  |        |        |     |        |        |   |        |        |    |       |    |   |       |    |   |



|        |               |    |
|--------|---------------|----|
| Yeoman | Betamethasone | NA |
| 1978   | Placebo       | NA |
| Addy   | Chlorhexidine | NA |
| 1976   | Placebo       | NA |
| Addy   | Zinc          | NA |
| 1974   | Placebo       | NA |
| Browne | Placebo       | NA |
| 1968   | Triamcinolone | NA |



|            |                       |    |        |       |   |        |       |     |        |       |    |        |       |    |        |       |   |        |    |   |
|------------|-----------------------|----|--------|-------|---|--------|-------|-----|--------|-------|----|--------|-------|----|--------|-------|---|--------|----|---|
| Seyyedi    | Laser                 | 5  | 77.05  | 11.40 | 0 | 73.70  | 6.70  | 0.5 | 77.05  | 6.70  | 1  | 56.95  | 15.58 | 2  | 73.70  | 18.09 | 3 |        |    |   |
| 2020       | Laser                 | 5  | 79.72  | 16.98 | 0 | 58.93  | 16.12 | 0.5 | 58.93  | 16.12 | 1  | 69.32  | 18.20 | 2  | 83.19  | 6.59  | 3 |        |    |   |
|            | Triamcinolone         | 5  | 36.22  | 9.86  | 0 | 48.29  | 20.72 | 0.5 | 52.31  | 19.72 | 1  | 68.41  | 28.17 | 2  | 80.48  | 26.16 | 3 |        |    |   |
| Raman      | Curcumin              | NA |        |       |   |        |       |     |        |       |    |        |       |    |        |       |   |        |    |   |
| 2020       | Triamcinolone         | NA |        |       |   |        |       |     |        |       |    |        |       |    |        |       |   |        |    |   |
| Bardellini | Laser                 | 30 | 75.00  | 41.50 | 4 | 75.00  | 46.00 | 7   |        |       |    |        |       |    |        |       |   |        |    |   |
| 2020       | Placebo               | 30 | 25.00  | 45.75 | 4 | 75.00  | 45.00 | 7   |        |       |    |        |       |    |        |       |   |        |    |   |
| Nirmala    | Probiotics            | NA |        |       |   |        |       |     |        |       |    |        |       |    |        |       |   |        |    |   |
| 2019       | Triamcinolone         | NA |        |       |   |        |       |     |        |       |    |        |       |    |        |       |   |        |    |   |
| Soliman    | Laser                 | 10 | 50.00  | 87.00 | 2 | 59.00  | 86.50 | 3   | 91.82  | 18.34 | 4  | 100.00 | 0.00  | 6  |        |       |   |        |    |   |
| 2019       | Placebo               | 10 | 0.00   | 0.00  | 2 | 8.00   | 14.00 | 3   | 8.00   | 13.98 | 4  | 48.00  | 31.55 | 6  |        |       |   |        |    |   |
| Tavangar   | Triamcinolone         | 20 | 0.00   | NA    | 1 | 5.00   | NA    | 2   | 25.00  | NA    | 3  | 45.00  | NA    | 4  | 70.00  | NA    | 5 | 100.00 | NA | 6 |
| 2019       | Placebo               | 20 | 0.00   | NA    | 1 | 0.00   | NA    | 2   | 5.00   | NA    | 3  | 30.00  | NA    | 4  | 50.00  | NA    | 5 | 90.00  | NA | 6 |
|            |                       |    | 100.00 | NA    | 7 |        |       |     |        |       |    |        |       |    |        |       |   |        |    |   |
|            |                       |    | 100.00 | NA    | 7 |        |       |     |        |       |    |        |       |    |        |       |   |        |    |   |
| Halboub    | N-acetylcysteine      | 38 | 47.47  | 32.28 | 2 | 78.64  | 40.66 | 4   | 89.87  | 37.34 | 6  |        |       |    |        |       |   |        |    |   |
| 2019       | Chlorhexidine         | 20 | 31.82  | 35.27 | 2 | 62.73  | 49.82 | 4   | 80.91  | 39.27 | 6  |        |       |    |        |       |   |        |    |   |
| El-Wakeel  | Insulin-liposomal gel | 40 | 62.50  | 24.50 | 1 | 75.00  | 24.50 | 2   | 100.00 | 0.00  | 3  | 100.00 | 0.00  | 4  | 100.00 | 0.00  | 6 |        |    |   |
| 2019       | Placebo               | 40 | 0.00   | 0.00  | 1 | 12.50  | 18.50 | 2   | 25.00  | 18.50 | 3  | 62.50  | 27.75 | 4  | 50.00  | 18.50 | 6 |        |    |   |
| Rahmani    | Chitosan              | 20 | -17.15 | NA    | 3 | 57.85  | NA    | 5   | 80.81  | NA    | 7  | 100.00 | NA    | 10 |        |       |   |        |    |   |
| 2018       | Triamcinolone         | 20 | 39.73  | NA    | 3 | 88.36  | NA    | 5   | 97.26  | NA    | 7  | 100.00 | NA    | 10 |        |       |   |        |    |   |
| Sharma     | Triamcinolone         | 10 | 59.72  | 16.25 | 4 | 88.89  | 9.44  | 8   | 100.00 | 0.00  | 10 |        |       |    |        |       |   |        |    |   |
| 2018       | Benzydamine           | 10 | 49.18  | 18.69 | 4 | 100.00 | 10.98 | 8   | 100.00 | 0.00  | 10 |        |       |    |        |       |   |        |    |   |
|            | Doxycycline           | 10 | 64.29  | 16.86 | 4 | 100.00 | 9.14  | 8   | 100.00 | 0.00  | 10 |        |       |    |        |       |   |        |    |   |
|            | Placebo               | 10 | 38.81  | 17.46 | 4 | 100.00 | 11.04 | 8   | 88.06  | 9.55  | 10 |        |       |    |        |       |   |        |    |   |
| Ofluoglu   | Triamcinolone         | 53 | 14.34  | 5.42  | 2 | 32.61  | 6.43  | 4   | 63.96  | 10.59 | 6  |        |       |    |        |       |   |        |    |   |

|                    |                         |    |        |       |   |       |       |   |        |       |   |       |       |   |        |       |    |        |      |   |
|--------------------|-------------------------|----|--------|-------|---|-------|-------|---|--------|-------|---|-------|-------|---|--------|-------|----|--------|------|---|
| 2017               | Triester Glycerol Oxide | 56 | 23.18  | 5.47  | 2 | 42.85 | 9.19  | 4 | 72.86  | 11.30 | 6 |       |       |   |        |       |    |        |      |   |
|                    | Placebo                 | 51 | 9.03   | 6.76  | 2 | 28.63 | 8.12  | 4 | 61.21  | 10.40 | 6 |       |       |   |        |       |    |        |      |   |
| Zeini              | Laser                   | 14 | 1.71   | 3.02  | 0 |       |       |   |        |       |   |       |       |   |        |       |    |        |      |   |
| 2017               | Placebo                 | 10 | 1.00   | 2.30  | 0 |       |       |   |        |       |   |       |       |   |        |       |    |        |      |   |
| Rodríguez-Archilla | Silver nitrate          | NA |        |       |   |       |       |   |        |       |   |       |       |   |        |       |    |        |      |   |
| 2017               | Honey                   | NA |        |       |   |       |       |   |        |       |   |       |       |   |        |       |    |        |      |   |
|                    | Placebo                 | NA |        |       |   |       |       |   |        |       |   |       |       |   |        |       |    |        |      |   |
| Pandya             | Quercetin               | 20 | 45.79  | 33.27 | 2 | 85.98 | 30.65 | 4 | 98.13  | 31.03 | 7 |       |       |   |        |       |    |        |      |   |
| 2017               | Benzydamine             | 20 | 34.34  | 36.57 | 2 | 67.68 | 39.39 | 4 | 90.91  | 30.51 | 7 |       |       |   |        |       |    |        |      |   |
| Yilmaz             | Laser                   | 40 | 97.59  | 22.89 | 0 | 90.36 | 22.53 | 1 | 95.18  | 24.22 | 3 | 98.80 | 23.73 | 7 | 100.00 | 0.00  | 10 |        |      |   |
| 2017               | Placebo                 | 40 | 3.7    | 27.90 | 0 | 8.64  | 26.67 | 1 | 41.98  | 26.17 | 3 | 86.42 | 26.17 | 7 | 100.00 | 0.00  | 10 |        |      |   |
| Nasry              | Glycyrrhiza             | 15 | 22.20  | 10.50 | 2 | 43.40 | 15.80 | 5 |        |       |   |       |       |   |        |       |    |        |      |   |
| 2016               | Amlexanox               | 15 | 29.80  | 11.30 | 2 | 61.90 | 24.50 | 5 |        |       |   |       |       |   |        |       |    |        |      |   |
|                    | Laser                   | 15 | 43.30  | 20.00 | 2 | 67.80 | 21.50 | 5 |        |       |   |       |       |   |        |       |    |        |      |   |
|                    | Placebo                 | 15 | 4.10   | 0.50  | 2 | 6.20  | 1.60  | 5 |        |       |   |       |       |   |        |       |    |        |      |   |
| Abbasi             | Dexamethasone           | 20 | 61.83  | 33.02 | 3 | 88.36 | 33.97 | 5 | 100.00 | 0.00  | 7 |       |       |   |        |       |    |        |      |   |
| 2016               | Amlexanox               | 20 | 65.73  | 36.89 | 3 | 80.52 | 37.21 | 5 | 100.00 | 0.00  | 7 |       |       |   |        |       |    |        |      |   |
| Andishe Tadbir     | Placebo                 | 15 | -17.63 | 48.68 | 3 | 36.84 | 48.95 | 6 |        |       |   |       |       |   |        |       |    |        |      |   |
| 2015               | Triamcinolone           | 14 | 58.70  | 28.26 | 3 | 89.61 | 28.50 | 6 |        |       |   |       |       |   |        |       |    |        |      |   |
| Raeesi             | Glycyrrhiza             | 20 | 55.43  | 11.88 | 1 | 92.96 | 10.26 | 3 | 100.00 | 0.00  | 5 |       |       |   |        |       |    |        |      |   |
| 2015               | Placebo                 | 20 | 17.42  | 13.53 | 1 | 41.37 | 13.37 | 3 | 62.21  | 13.69 | 5 |       |       |   |        |       |    |        |      |   |
| Aggarwal           | Laser                   | NA |        |       |   |       |       |   |        |       |   |       |       |   |        |       |    |        |      |   |
| 2014               | Placebo                 | NA |        |       |   |       |       |   |        |       |   |       |       |   |        |       |    |        |      |   |
| Mansour            | Aloe                    | 30 | 56.10  | NA    | 4 | 76.45 | 45.61 | 6 |        |       |   |       |       |   |        |       |    |        |      |   |
| 2014               | Placebo                 | 30 | 30.74  | NA    | 4 | 63.20 | 56.71 | 6 |        |       |   |       |       |   |        |       |    |        |      |   |
| Deshmukh           | Curcumin                | 30 | 29.79  | 32.34 | 1 | 55.32 | 33.19 | 2 | 76.60  | 30.21 | 3 | 91.49 | 28.30 | 4 | 98.72  | 30.64 | 5  | 100.00 | 0.00 | 6 |



|                           |                                   |                |                                                     |                                              |                            |                                                        |                                  |                            |                          |                      |             |                           |                      |             |                           |                      |             |                           |                      |             |
|---------------------------|-----------------------------------|----------------|-----------------------------------------------------|----------------------------------------------|----------------------------|--------------------------------------------------------|----------------------------------|----------------------------|--------------------------|----------------------|-------------|---------------------------|----------------------|-------------|---------------------------|----------------------|-------------|---------------------------|----------------------|-------------|
| 2014                      | Triamcinolone                     | 30             | 26.67<br>100.00<br>100.00                           | 34.89<br>0.00<br>0.00                        | 1<br>7<br>7                | 53.33                                                  | 35.78                            | 2                          | 75.56                    | 33.11                | 3           | 88.89                     | 28.67                | 4           | 95.56                     | 27.56                | 5           | 98.67                     | 29.33                | 6           |
| El-Haddad<br>2014         | Honey<br>Triamcinolone<br>Placebo | 67<br>57<br>56 | 99.33<br>25.81<br>3.57<br>100.00<br>100.00<br>95.19 | NA<br>NA<br>NA<br>NA<br>NA<br>NA             | 1<br>1<br>1<br>7<br>7<br>7 | 100.00<br>56.86<br>13.01<br>100.00<br>100.00<br>100.00 | NA<br>NA<br>NA<br>NA<br>NA<br>NA | 2<br>2<br>2<br>8<br>8<br>8 | 100.00<br>90.79<br>23.53 | NA<br>NA<br>NA       | 3<br>3<br>3 | 100.00<br>100.00<br>64.35 | NA<br>NA<br>NA       | 4<br>4<br>4 | 100.00<br>100.00<br>83.78 | NA<br>NA<br>NA       | 5<br>5<br>5 | 100.00<br>100.00<br>85.92 | NA<br>NA<br>NA       | 6<br>6<br>6 |
| Albrektson<br>2014        | Laser<br>Placebo                  | 20<br>20       | 33.65<br>1.22                                       | NA<br>NA                                     | 1<br>1                     | 62.81<br>6.85                                          | NA<br>NA                         | 2<br>2                     |                          |                      |             |                           |                      |             |                           |                      |             |                           |                      |             |
| Soylu<br>2014             | Silver nitrate<br>Placebo         | 35<br>30       | 23.65<br>7.61                                       | 9.39<br>7.61                                 | 1<br>1                     | 55.80<br>35.22                                         | 8.84<br>8.70                     | 3<br>3                     | 94.70<br>68.48           | 8.18<br>8.70         | 7<br>7      |                           |                      |             |                           |                      |             |                           |                      |             |
| Soylu and Okuyucu<br>2014 | Sucralfate<br>Chlorhexidine       | 35<br>35       | 27.95<br>16.00                                      | 8.64<br>9.06                                 | 1<br>1                     | 50.39<br>31.32                                         | 9.99<br>9.73                     | 3<br>3                     | 94.95<br>88.81           | 8.31<br>11.86        | 7<br>7      |                           |                      |             |                           |                      |             |                           |                      |             |
| Bhat<br>2013              | Amlexanox<br>Placebo              | 50<br>50       | 60.72<br>9.31                                       | 16.80<br>15.82                               | 4<br>4                     | 89.66<br>22.07                                         | 12.02<br>17.69                   | 6<br>6                     |                          |                      |             |                           |                      |             |                           |                      |             |                           |                      |             |
| Bhalang<br>2013           | Triamcinolone<br>Aloe<br>Placebo  | 60<br>60<br>60 | 12.43<br>14.80<br>10.62<br>93.11<br>82.37<br>75.48  | 3.93<br>3.73<br>4.14<br>4.14<br>3.93<br>3.93 | 0<br>0<br>0<br>7<br>7<br>7 | 29.72<br>24.97<br>18.98                                | 3.62<br>3.73<br>4.14             | 2<br>2<br>2                | 49.49<br>32.09<br>29.15  | 3.80<br>4.14<br>4.30 | 3<br>3<br>3 | 64.97<br>44.41<br>40.23   | 4.14<br>3.93<br>3.93 | 4<br>4<br>4 | 78.19<br>56.61<br>51.53   | 3.62<br>3.62<br>3.93 | 5<br>5<br>5 | 87.80<br>69.15<br>64.07   | 3.73<br>3.93<br>4.14 | 6<br>6<br>6 |
| Halim<br>2013             | Curcumin<br>Triamcinolone         | 10<br>10       | 80.70<br>81.82                                      | 36.32<br>72.04                               | 5<br>5                     |                                                        |                                  |                            |                          |                      |             |                           |                      |             |                           |                      |             |                           |                      |             |
| Jiang and Yang            | Diosmectite                       | 35             | 9.75                                                | 16.10                                        | 2                          | 24.39                                                  | 21.99                            | 3                          | 42.68                    | 23.74                | 4           | 51.22                     | 17.20                | 5           | 56.10                     | 16.13                | 6           |                           |                      |             |

|               |                   |     |        |       |     |        |       |   |        |       |   |        |       |    |       |       |   |       |       |   |
|---------------|-------------------|-----|--------|-------|-----|--------|-------|---|--------|-------|---|--------|-------|----|-------|-------|---|-------|-------|---|
| 2013          | Placebo           | 30  | 5.13   | 21.92 | 2   | 14.10  | 23.08 | 3 | 24.36  | 25.77 | 4 | 35.90  | 22.69 | 5  | 38.46 | 21.28 | 6 |       |       |   |
| Jiang and Zhu | Berberine gelatin | 42  | 16.10  | 16.71 | 2   | 44.57  | 17.20 | 4 | 76.65  | 16.83 | 6 |        |       |    |       |       |   |       |       |   |
| 2013          | Placebo           | 42  | 6.56   | 12.57 | 2   | 22.60  | 15.09 | 4 | 60.87  | 13.53 | 6 |        |       |    |       |       |   |       |       |   |
| Prasad        | Laser             | 25  | 91.98  | 7.90  | 0   | 96.70  | 7.55  | 1 |        |       |   |        |       |    |       |       |   |       |       |   |
| 2013          | Placebo           | 25  | 1.49   | 9.65  | 0   | 8.17   | 9.78  | 1 |        |       |   |        |       |    |       |       |   |       |       |   |
| Vijayabala    | Doxycycline       | 25  | 42.19  | 29.69 | 1   | 64.06  | 28.13 | 2 | 85.94  | 29.69 | 3 | 93.75  | 34.38 | 4  | 98.44 | 37.50 | 5 | 98.44 | 37.50 | 6 |
| 2013          | Placebo           | 25  | 11.86  | 16.95 | 1   | 23.73  | 25.42 | 2 | 47.46  | 37.29 | 3 | 67.80  | 35.59 | 4  | 84.75 | 32.20 | 5 | 96.61 | 35.59 | 6 |
|               |                   |     | 98.44  | 35.94 | 7   | 100.00 | 3     | 8 | 100.00 | 0     | 9 | 100.00 | 0     | 10 |       |       |   |       |       |   |
|               |                   |     | 100.00 | 0.00  | 7   | 100.00 | 0     | 8 | 100.00 | 0     | 9 | 100.00 | 0     | 10 |       |       |   |       |       |   |
| Sattayut      | Laser             | 7   | 20.51  | 35.67 | 0   | 22.08  | 39.37 | 1 | 49.73  | 39.07 | 2 |        |       |    |       |       |   |       |       |   |
| 2013          | Placebo           | 7   | 41.99  | 38.61 | 0   | 25.37  | 35.16 | 1 | 38.47  | 41.04 | 2 |        |       |    |       |       |   |       |       |   |
| Jiang         | Allicin           | 48  | 20.10  | 22.79 | 2   | 56.30  | 17.83 | 4 | 75.70  | 16.62 | 6 |        |       |    |       |       |   |       |       |   |
| 2012          | Placebo           | 48  | 13.90  | 29.37 | 2   | 33.60  | 28.42 | 4 | 52.00  | 23.22 | 6 |        |       |    |       |       |   |       |       |   |
| Manifar       | Curcumin          | NA  |        |       |     |        |       |   |        |       |   |        |       |    |       |       |   |       |       |   |
| 2012          | Placebo           | NA  |        |       |     |        |       |   |        |       |   |        |       |    |       |       |   |       |       |   |
| Liu           | Dexamethasone     | 114 | 95.09  | 33.16 | 6±2 |        |       |   |        |       |   |        |       |    |       |       |   |       |       |   |
| 2012          | Placebo           | 117 | 82.19  | 37.27 | 6±2 |        |       |   |        |       |   |        |       |    |       |       |   |       |       |   |
| Babae         | Aloe              | 20  | 19.33  | NA    | 2   | 44.15  | NA    | 3 | 64.36  | NA    | 4 | 74.47  | NA    | 5  | 79.61 | NA    | 6 | 82.62 | NA    | 7 |
| 2012          | Placebo           | 20  | 13.11  | NA    | 2   | 34.65  | NA    | 3 | 44.34  | NA    | 4 | 59.61  | NA    | 5  | 69.66 | NA    | 6 | 77.20 | NA    | 7 |
| Zand          | Laser             | NA  |        |       |     |        |       |   |        |       |   |        |       |    |       |       |   |       |       |   |
| 2012          | Placebo           | NA  |        |       |     |        |       |   |        |       |   |        |       |    |       |       |   |       |       |   |
| Galal         | Glycyrrhiza       | 10  | 14.60  | 10.20 | 2   | 22.90  | 40.30 | 5 |        |       |   |        |       |    |       |       |   |       |       |   |
| 2012          | Placebo           | 10  | 4.00   | 0.70  | 2   | 6.00   | 1.20  | 5 |        |       |   |        |       |    |       |       |   |       |       |   |
| Trinchieri    | Probiotics        | 15  | 96.82  | NA    | 7   |        |       |   |        |       |   |        |       |    |       |       |   |       |       |   |
| 2011          | Placebo           | 15  | 47.14  | NA    | 7   |        |       |   |        |       |   |        |       |    |       |       |   |       |       |   |
| Meng          | Amlexanox         | 108 | 56.12  | 43.88 | 4   | 80.97  | 43.31 | 6 |        |       |   |        |       |    |       |       |   |       |       |   |

|             |               |     |        |       |     |        |       |     |        |       |    |        |       |     |        |       |     |        |       |     |
|-------------|---------------|-----|--------|-------|-----|--------|-------|-----|--------|-------|----|--------|-------|-----|--------|-------|-----|--------|-------|-----|
| 2009        | Placebo       | 105 | 38.75  | 45.20 | 4   | 66.61  | 43.91 | 6   |        |       |    |        |       |     |        |       |     |        |       |     |
| Tezel       | Triamcinolone | 10  | 19.82  | 9.33  | 1   | 51.94  | 8.81  | 4   | 93.01  | 8.29  | 7  |        |       |     |        |       |     |        |       |     |
| 2009        | Laser         | 10  | 82.97  | 9.78  | 1   | 97.71  | 8.77  | 4   | 100.00 | 0.00  | 7  |        |       |     |        |       |     |        |       |     |
| Skulason    | Doxycycline   | 25  | 23.53  | 48.04 | 2   | 43.14  | 53.33 | 3   |        |       |    |        |       |     |        |       |     |        |       |     |
| 2009        | Placebo       | 24  | 9.43   | 48.11 | 2   | 24.53  | 51.32 | 3   |        |       |    |        |       |     |        |       |     |        |       |     |
| Zand        | Laser         | 15  | 98.87  | 19.03 | 0   | 92.74  | 19.35 | 4h  | 90.32  | 18.55 | 8h | 90     | 18.87 | 12h | 92.10  | 19.03 | 24h | 91.61  | 18.55 | 48h |
| 2009        | Placebo       | 15  | 3.33   | 21.48 | 0   | -0.37  | 21.30 | 4h  | 0.00   | 21.48 | 8h | 0.37   | 21.30 | 12h | -3.15  | 20.93 | 24h | 12.96  | 20.93 | 48h |
|             |               |     | 95.97  | 19.19 | 72h | 96.29  | 19.35 | 96h |        |       |    |        |       |     |        |       |     |        |       |     |
|             |               |     | 25.19  | 21.11 | 72h | 42.04  | 20.93 | 96h |        |       |    |        |       |     |        |       |     |        |       |     |
| Moghadamnia | Glycyrrhiza   | 15  | -86.44 | 24.29 | 1   | -97.74 | 23.16 | 2   | -40.11 | 24.29 | 3  | 18.64  | 23.16 | 4   | 57.06  | 23.16 | 5   |        |       |     |
| 2009        | Placebo       | 15  | -52.78 | 17.06 | 1   | -42.46 | 16.67 | 2   | -15.08 | 16.67 | 3  | 25.40  | 17.06 | 4   | 48.81  | 17.06 | 5   |        |       |     |
| Gorsky      | Minocycline   | 18  | 20.41  | NA    | 1   | 55.51  | NA    | 2   | 69.39  | NA    | 3  | 73.47  | NA    | 4   | 79.59  | NA    | 5   | 79.59  | NA    | 6   |
| 2008        | Placebo       | 15  | -2.78  | NA    | 1   | -38.89 | NA    | 2   | -55.56 | NA    | 3  | -66.67 | NA    | 4   | -66.67 | NA    | 5   | -61.11 | NA    | 6   |
|             |               |     | 79.59  | NA    | 7   | 79.59  | NA    | 8   | 79.59  | NA    | 9  | 79.59  | NA    | 10  |        |       |     |        |       |     |
|             |               |     | -50    | NA    | 7   | -22.22 | NA    | 8   | -8.33  | NA    | 9  | 16.67  | NA    | 10  |        |       |     |        |       |     |
| Rodríguez   | Clobetasol    | 48  | 50.29  | NA    | 2   | 84.35  | NA    | 5   |        |       |    |        |       |     |        |       |     |        |       |     |
| 2007        | Amlexanox     | 48  | 45.95  | NA    | 2   | 74.16  | NA    | 5   |        |       |    |        |       |     |        |       |     |        |       |     |
| Arikan      | Cryotherapy   | NA  |        |       |     |        |       |     |        |       |    |        |       |     |        |       |     |        |       |     |
| 2006        | Placebo       | NA  |        |       |     |        |       |     |        |       |    |        |       |     |        |       |     |        |       |     |
| Liu         | Amlexanox     | 104 | 58.00  | 44.89 | 4   | 90.00  | 39.33 | 6   |        |       |    |        |       |     |        |       |     |        |       |     |
| 2006        | Placebo       | 108 | 43.00  | 48.77 | 4   | 76.54  | 43.21 | 6   |        |       |    |        |       |     |        |       |     |        |       |     |
| Garnick     | Placebo       | NA  |        |       |     |        |       |     |        |       |    |        |       |     |        |       |     |        |       |     |
| 1998        | Aloe          | NA  |        |       |     |        |       |     |        |       |    |        |       |     |        |       |     |        |       |     |
| Khandwala   | Placebo       | 512 | 36.63  | 3.02  | 3   | 49.88  | 3.25  | 4   | 65.66  | 3.48  | 5  |        |       |     |        |       |     |        |       |     |
| 1997        | Amlexanox     | 579 | 42.08  | 2.72  | 3   | 66.09  | 3.22  | 4   | 81.93  | 2.97  | 5  |        |       |     |        |       |     |        |       |     |
| Ylikontiola | Doxycycline   | 15  | 38.00  | 14.40 | 1   | 61.60  | 10.00 | 2   | 76.60  | 5.80  | 3  | 82.60  | 3.60  | 4   | 84.40  | 5.20  | 5   | 90.00  | 5.20  | 6   |

|          |                  |    |        |       |   |        |       |   |        |       |    |        |       |    |       |       |   |       |       |   |
|----------|------------------|----|--------|-------|---|--------|-------|---|--------|-------|----|--------|-------|----|-------|-------|---|-------|-------|---|
| 1997     | Placebo          | 16 | 16.00  | 13.00 | 1 | 22.00  | 9.20  | 2 | 27.40  | 10.40 | 3  | 39.40  | 10.40 | 4  | 57.80 | 9.20  | 5 | 71.20 | 8.20  | 6 |
|          |                  |    | 95.20  | 3.00  | 7 | 94.80  | 2.60  | 8 | 98.40  | 1.60  | 9  | 99.60  | 0.60  | 10 |       |       |   |       |       |   |
|          |                  |    | 80.40  | 7.00  | 7 | 94.40  | 4.40  | 8 | 98.80  | 1.20  | 9  | 100.00 | 0.00  | 10 |       |       |   |       |       |   |
| Greer Jr | Amlexanox        | NA |        |       |   |        |       |   |        |       |    |        |       |    |       |       |   |       |       |   |
| 1993     | Placebo          | NA |        |       |   |        |       |   |        |       |    |        |       |    |       |       |   |       |       |   |
| Miles    | Triamcinolone    | 6  | 32.79  | 21.31 | 2 | 48.91  | 21.86 | 3 | 74.59  | 21.31 | 4  | 77.60  | 21.04 | 5  | 86.34 | 21.58 | 6 | 95.36 | 22.95 | 7 |
| 1993     | Chlorhexidine    | 6  | 38.67  | 20.26 | 2 | 78.27  | 18.23 | 3 | 84.71  | 18.23 | 4  | 86.56  | 18.05 | 5  | 90.24 | 18.05 | 6 | 90.42 | 18.05 | 7 |
|          |                  |    | 98.36  | 23.77 | 8 | 99.73  | 24.32 | 9 | 100.00 | 0     | 10 |        |       |    |       |       |   |       |       |   |
|          |                  |    | 100.00 | 0.00  | 8 | 100.00 | 0.00  | 9 | 100.00 | 0     | 10 |        |       |    |       |       |   |       |       |   |
| Taylor   | Prostaglandin E2 | 18 | -4.86  | NA    | 2 | -0.4   | NA    | 3 | -10.53 | NA    | 4  | 19.84  | NA    | 5  | 50.61 | NA    | 6 | 68.42 | NA    | 7 |
| 1993     | Placebo          | 15 | -16.67 | NA    | 2 | -14.78 | NA    | 3 | 10.38  | NA    | 4  | 22.96  | NA    | 5  | 42.45 | NA    | 6 | 63.52 | NA    | 7 |
|          |                  |    | 78.95  | NA    | 8 | 87.85  | NA    | 9 | 89.96  | NA    | 10 |        |       |    |       |       |   |       |       |   |
|          |                  |    | 64.47  | NA    | 8 | 83.96  | NA    | 9 | 88.36  | NA    | 10 |        |       |    |       |       |   |       |       |   |
| Hunter   | Chlorhexidine    | NA |        |       |   |        |       |   |        |       |    |        |       |    |       |       |   |       |       |   |
| 1987     | Placebo          | NA |        |       |   |        |       |   |        |       |    |        |       |    |       |       |   |       |       |   |
| Matthews | Benzylamine      | NA |        |       |   |        |       |   |        |       |    |        |       |    |       |       |   |       |       |   |
| 1987     | Chlorhexidine    | NA |        |       |   |        |       |   |        |       |    |        |       |    |       |       |   |       |       |   |
| Yeoman   | Betamethasone    | NA |        |       |   |        |       |   |        |       |    |        |       |    |       |       |   |       |       |   |
| 1978     | Placebo          | NA |        |       |   |        |       |   |        |       |    |        |       |    |       |       |   |       |       |   |
| Addy     | Chlorhexidine    | NA |        |       |   |        |       |   |        |       |    |        |       |    |       |       |   |       |       |   |
| 1976     | Placebo          | NA |        |       |   |        |       |   |        |       |    |        |       |    |       |       |   |       |       |   |
| Addy     | Zinc             | NA |        |       |   |        |       |   |        |       |    |        |       |    |       |       |   |       |       |   |
| 1974     | Placebo          | NA |        |       |   |        |       |   |        |       |    |        |       |    |       |       |   |       |       |   |
| Browne   | Placebo          | NA |        |       |   |        |       |   |        |       |    |        |       |    |       |       |   |       |       |   |
| 1968     | Triamcinolone    | NA |        |       |   |        |       |   |        |       |    |        |       |    |       |       |   |       |       |   |

**Table S10 Details information of studies for each outcome in network meta-analysis (3)**

| Author         | Year | Treatment     | Healing effect (days) |      |       | Adverse event occurrence |       |
|----------------|------|---------------|-----------------------|------|-------|--------------------------|-------|
|                |      |               | Mean                  | SD   | Total | Events                   | Total |
| Huo            |      | Laser         | 6.60                  | 0.29 | 25    | NA                       |       |
| 2021           |      | Triamcinolone | 7.77                  | 0.52 | 26    | NA                       |       |
| Aggour (adlt)  |      | Probiotics    | NA                    |      |       | NA                       |       |
| 2021           |      | Placebo       | NA                    |      |       | NA                       |       |
| Aggour (child) |      | Probiotics    | NA                    |      |       | NA                       |       |
| 2021           |      | Placebo       | NA                    |      |       | NA                       |       |
| Shi            |      | Aloe          | 7.40                  | 1.85 | 20    | NA                       |       |
| 2020           |      | Chitosan      | 7.93                  | 1.84 | 15    | NA                       |       |
| Kavita         |      | Triamcinolone | NA                    |      |       | NA                       |       |
| 2020           |      | Amlexanox     | NA                    |      |       | NA                       |       |
| Shao           |      | Chitosan      | NA                    |      |       | 0                        | 34    |
| 2020           |      | Placebo       | NA                    |      |       | 0                        | 32    |
| Pedersen       |      | Probiotics    | NA                    |      |       | 0                        | 10    |
| 2020           |      | Placebo       | NA                    |      |       | 0                        | 10    |
| Ghorbani       |      | Zinc          | NA                    |      |       | 0                        | 23    |
| 2020           |      | Placebo       | NA                    |      |       | 0                        | 23    |
| Ibrahim        |      | Triamcinolone | 7.75                  | 2.88 | 20    | 0                        | 20    |
| 2020           |      | Probiotics    | 5.40                  | 1.40 | 20    | 0                        | 20    |
| Kia            |      | Curcumin      | NA                    |      |       | 0                        | 29    |
| 2020           |      | Triamcinolone | NA                    |      |       | 0                        | 29    |
| Owlia          |      | Penicillin    | 2.79                  | 0.16 | 14    | 3                        | 25    |
| 2020           |      | Placebo       | 5.90                  | 0.93 | 12    | 0                        | 25    |

|            |                         |      |      |    |    |    |
|------------|-------------------------|------|------|----|----|----|
| Seyyedi    | Laser                   | NA   |      |    | NA |    |
| 2020       | Laser                   | NA   |      |    | NA |    |
|            | Triamcinolone           | NA   |      |    | NA |    |
| Raman      | Curcumin                | 7.21 | 0.08 | 30 | 0  | 30 |
| 2020       | Triamcinolone           | 6.77 | 0.08 | 30 | 0  | 30 |
| Bardellini | Laser                   | NA   |      |    | NA |    |
| 2020       | Placebo                 | NA   |      |    | NA |    |
| Nirmala    | Probiotics              | NA   |      |    | NA |    |
| 2019       | Triamcinolone           | NA   |      |    | NA |    |
| Soliman    | Laser                   | NA   |      |    | NA |    |
| 2019       | Placebo                 | NA   |      |    | NA |    |
| Tavangar   | Triamcinolone           | 5.75 | 1.08 | 20 | NA |    |
| 2019       | Placebo                 | 6.50 | 1.05 | 20 | NA |    |
| Halboub    | N-acetylcysteine        | 4.87 | 2.46 | 38 | NA |    |
| 2019       | Chlorhexidine           | 5.40 | 2.82 | 20 | NA |    |
| El-Wakeel  | Insulin-liposomal gel   | 4.20 | 0.60 | 40 | NA |    |
| 2019       | Placebo                 | 8.10 | 1.00 | 40 | NA |    |
| Rahmani    | Chitosan                | 6.20 | 1.82 | 20 | 1  | 20 |
| 2018       | Triamcinolone           | 5.15 | 1.42 | 20 | 0  | 20 |
| Sharma     | Triamcinolone           | NA   |      |    | 0  | 10 |
| 2018       | Benzydamine             | NA   |      |    | 0  | 10 |
|            | Doxycycline             | NA   |      |    | 0  | 10 |
|            | Placebo                 | NA   |      |    | 0  | 10 |
| Ofluoglu   | Triamcinolone           | NA   |      |    | 0  | 53 |
| 2017       | Triester Glycerol Oxide | NA   |      |    | 0  | 56 |
|            | Placebo                 | NA   |      |    | 0  | 51 |

|                    |                |      |      |    |    |    |
|--------------------|----------------|------|------|----|----|----|
| Zeini              | Laser          | 7.21 | 4.20 | 14 | NA |    |
| 2017               | Placebo        | 6.40 | 1.83 | 10 | NA |    |
| Rodríguez-Archilla | Silver nitrate | 7.32 | 0.99 | 25 | 0  | 25 |
| 2017               | Honey          | 6.80 | 0.71 | 25 | 0  | 25 |
|                    | Placebo        | 8.96 | 0.89 | 25 | 0  | 25 |
| Pandya             | Quercetin      | NA   |      |    | NA |    |
| 2017               | Benzydamine    | NA   |      |    | NA |    |
| Yilmaz             | Laser          | NA   |      |    | 0  | 40 |
| 2017               | Placebo        | NA   |      |    | 0  | 40 |
| Nasry              | Glycyrrhiza    | NA   |      |    | NA |    |
| 2016               | Amlexanox      | NA   |      |    | NA |    |
|                    | Laser          | NA   |      |    | NA |    |
|                    | Placebo        | NA   |      |    | NA |    |
| Abbasi             | Dexamethasone  | NA   |      |    | NA |    |
| 2016               | Amlexanox      | NA   |      |    | NA |    |
| Andishe Tadbir     | Placebo        | 6.58 | NA   | 15 | NA |    |
| 2015               | Triamcinolone  | 4.22 | NA   | 14 | NA |    |
| Raeesi             | Glycyrrhiza    | 4.20 | 1.30 | 20 | 0  | 20 |
| 2015               | Placebo        | 7.45 | 1.30 | 20 | 0  | 20 |
| Aggarwal           | Laser          | 3.05 | 1.10 | 30 | NA |    |
| 2014               | Placebo        | 8.90 | 2.45 | 30 | NA |    |
| Mansour            | Aloe           | NA   |      |    | 0  | 30 |
| 2014               | Placebo        | NA   |      |    | 0  | 30 |
| Deshmukh           | Curcumin       | 3.90 | 1.18 | 30 | 0  | 30 |
| 2014               | Triamcinolone  | 4.10 | 1.18 | 30 | 0  | 30 |
| El-Haddad          | Honey          | 2.73 | 0.57 | 67 | 0  | 67 |

|                   |                   |      |      |    |    |    |
|-------------------|-------------------|------|------|----|----|----|
| 2014              | Triamcinolone     | 5.91 | 0.91 | 57 | 0  | 57 |
|                   | Placebo           | 7.14 | 0.92 | 56 | 0  | 56 |
| Albrektson        | Laser             | NA   |      |    | 0  | 20 |
| 2014              | Placebo           | NA   |      |    | 0  | 20 |
| Soylu             | Silver nitrate    | 2.70 | 1.48 | 35 | 0  | 35 |
| 2014              | Placebo           | 5.50 | 2.22 | 30 | 0  | 30 |
| Soylu and Okuyucu | Sucralfate        | 1.97 | 1.56 | 23 | 0  | 35 |
| 2014              | Chlorhexidine     | 2.80 | 3.00 | 19 | 0  | 35 |
| Bhat              | Amlexanox         | NA   |      |    | 8  | 50 |
| 2013              | Placebo           | NA   |      |    | 0  | 50 |
| Bhalang           | Triamcinolone     | NA   |      |    | 0  | 60 |
| 2013              | Aloe              | NA   |      |    | 0  | 60 |
|                   | Placebo           | NA   |      |    | 0  | 60 |
| Halim             | Curcumin          | NA   |      |    | NA |    |
| 2013              | Triamcinolone     | NA   |      |    | NA |    |
| Jiang and Yang    | Diosmectite       | NA   |      |    | 0  | 35 |
| 2013              | Placebo           | NA   |      |    | 0  | 30 |
| Jiang and Zhu     | Berberine gelatin | NA   |      |    | 0  | 42 |
| 2013              | Placebo           | NA   |      |    | 0  | 42 |
| Prasad            | Laser             | 4.08 | 0.81 | 25 | NA |    |
| 2013              | Placebo           | 7.84 | 0.90 | 25 | NA |    |
| Vijayabala        | Doxycycline       | 3.70 | 1.30 | 25 | 8  | 25 |
| 2013              | Placebo           | 5.30 | 1.20 | 25 | 0  | 25 |
| Sattayut          | Laser             | NA   |      |    | NA |    |
| 2013              | Placebo           | NA   |      |    | NA |    |
| Jiang             | Allicin           | NA   |      |    | 0  | 48 |



|             |               |      |      |     |    |     |
|-------------|---------------|------|------|-----|----|-----|
| 2012        | Placebo       | NA   |      |     | 0  | 48  |
| Manifar     | Curcumin      | NA   |      |     | 0  | 28  |
| 2012        | Placebo       | NA   |      |     | 0  | 29  |
| Liu         | Dexamethasone | 6.00 | NA   | 114 | 4  | 120 |
| 2012        | Placebo       | 7.00 | NA   | 117 | 8  | 120 |
| Babae       | Aloe          | NA   |      |     | NA |     |
| 2012        | Placebo       | NA   |      |     | NA |     |
| Zand        | Laser         | 4.80 | 2.40 | 10  | 0  | 10  |
| 2012        | Placebo       | 7.60 | 2.50 | 10  | 0  | 10  |
| Galal       | Glycyrrhiza   | NA   |      |     | NA |     |
| 2012        | Placebo       | NA   |      |     | NA |     |
| Trinchieri  | Probiotics    | NA   |      |     | 0  | 15  |
| 2011        | Placebo       | NA   |      |     | 0  | 15  |
| Meng        | Amlexanox     | NA   |      |     | 0  | 108 |
| 2009        | Placebo       | NA   |      |     | 0  | 105 |
| Tezel       | Triamcinolone | NA   |      |     | 0  | 10  |
| 2009        | Laser         | NA   |      |     | 0  | 10  |
| Skulason    | Doxycycline   | NA   |      |     | 1  | 25  |
| 2009        | Placebo       | NA   |      |     | 0  | 24  |
| Zand        | Laser         | NA   |      |     | 0  | 15  |
| 2009        | Placebo       | NA   |      |     | 0  | 15  |
| Moghadamnia | Glycyrrhiza   | 8.46 | 1.55 | 15  | NA |     |
| 2009        | Placebo       | 8.60 | 1.68 | 15  | NA |     |
| Gorsky      | Minocycline   | NA   |      |     | 0  | 18  |
| 2008        | Placebo       | NA   |      |     | 0  | 15  |
| Rodríguez   | Clobetasol    | NA   |      |     | 0  | 48  |

|             |                  |       |       |     |    |     |
|-------------|------------------|-------|-------|-----|----|-----|
| 2007        | Amlexanox        | NA    |       |     | 0  | 48  |
| Arikan      | Cryotherapy      | NA    |       |     | NA |     |
| 2006        | Placebo          | NA    |       |     | NA |     |
| Liu         | Amlexanox        | NA    |       |     | 1  | 104 |
| 2006        | Placebo          | NA    |       |     | 1  | 108 |
| Garnick     | Placebo          | 9.01  | 1.32  | 4   | NA |     |
| 1998        | Aloe             | 6.38  | 0.73  | 3   | NA |     |
| Khandwala   | Placebo          | 4.90  | NA    | 512 | NA |     |
| 1997        | Amlexanox        | 5.60  | NA    | 579 | NA |     |
| Ylikontiola | Doxycycline      | NA    |       |     | NA |     |
| 1997        | Placebo          | NA    |       |     | NA |     |
| Greer Jr    | Amlexanox        | NA    |       |     | 0  | 18  |
| 1993        | Placebo          | NA    |       |     | 0  | 14  |
| Miles       | Triamcinolone    | 5.93  | NA    | 6   | NA |     |
| 1993        | Chlorhexidine    | 5.38  | NA    | 6   | NA |     |
| Taylor      | Prostaglandin E2 | 7.78  | 2.44  | 18  | NA |     |
| 1993        | Placebo          | 8.27  | 1.87  | 15  | NA |     |
| Hunter      | Chlorhexidine    | 5.02  | 2.41  | 38  | NA |     |
| 1987        | Placebo          | 5.78  | 2.74  | 38  | NA |     |
| Matthews    | Benzydamine      | NA    |       |     | NA |     |
| 1987        | Chlorhexidine    | NA    |       |     | NA |     |
| Yeoman      | Betamethasone    | 8.50  | NA    | 10  | NA |     |
| 1978        | Placebo          | 15.00 | NA    | 10  | NA |     |
| Addy        | Chlorhexidine    | 4.80  | 2.90  | 20  | NA |     |
| 1976        | Placebo          | 7.80  | 2.90  | 20  | NA |     |
| Addy        | Zinc             | 21.80 | 11.50 | 12  | NA |     |

|        |               |       |      |    |    |
|--------|---------------|-------|------|----|----|
| 1974   | Placebo       | 16.80 | 6.20 | 12 | NA |
| Browne | Placebo       | 8.21  | NA   | 26 | NA |
| 1968   | Triamcinolone | 7.53  | NA   | 26 | NA |

Chapter S1 Healing effect

1.Consistency Model

Summary estimates for Healing effect

The estimate values for healing effect are given as mean difference (MD) and 95% confidence interval (CI). The table shows the pooled estimates based on the network meta-analysis during the treatment period for each study.

|                   |                   |                   |                   |                   |                   |                   |                        |                   |                   |
|-------------------|-------------------|-------------------|-------------------|-------------------|-------------------|-------------------|------------------------|-------------------|-------------------|
| Alice             | 115 (-206, 438)   | 021 (-414, 450)   | 079 (-348, 519)   | 038 (-464, 529)   | 020 (-388, 446)   | -156 (-560, 245)  | -193 (-687, 294)       | -110 (-470, 263)  | -036 (-618, 529)  |
| -115 (-438, 206)  | Chitosan          | -094 (-543, 333)  | -036 (-443, 380)  | -079 (-601, 421)  | -093 (-530, 334)  | -270 (-676, 125)  | -308 (-815, 192)       | -224 (-596, 157)  | -147 (-732, 424)  |
| -021 (-450, 414)  | 094 (-333, 543)   | Chlorhexidine     | 063 (-362, 487)   | 018 (-445, 476)   | 001 (-387, 394)   | -174 (-537, 195)  | -212 (-675, 249)       | -130 (-443, 214)  | -055 (-436, 335)  |
| -079 (-519, 348)  | 036 (-380, 443)   | -063 (-487, 362)  | Curcumin          | -043 (-549, 445)  | -061 (-475, 364)  | -236 (-618, 149)  | -275 (-778, 206)       | -192 (-525, 157)  | -113 (-699, 446)  |
| -038 (-529, 464)  | 079 (-421, 601)   | -018 (-476, 445)  | 043 (-445, 549)   | Doxycycline       | -016 (-473, 445)  | -195 (-628, 251)  | -229 (-747, 294)       | -147 (-541, 281)  | -067 (-672, 538)  |
| -020 (-446, 388)  | 093 (-334, 530)   | -001 (-394, 387)  | 061 (-364, 475)   | 016 (-445, 473)   | Glycyrrhiza       | -177 (-538, 184)  | -214 (-674, 250)       | -131 (-443, 194)  | -057 (-614, 491)  |
| 156 (-245, 560)   | 270 (-125, 676)   | 174 (-195, 537)   | 236 (-149, 618)   | 195 (-251, 628)   | 177 (-184, 538)   | Honey             | -037 (-482, 392)       | 046 (-232, 332)   | 124 (-402, 650)   |
| 193 (-294, 687)   | 308 (-192, 815)   | 212 (-249, 675)   | 275 (-206, 778)   | 229 (-294, 747)   | 214 (-250, 674)   | 037 (-392, 482)   | Insulin-hipposorol gel | 082 (-311, 493)   | 158 (-451, 769)   |
| 110 (-263, 470)   | 224 (-157, 596)   | 130 (-214, 443)   | 192 (-157, 525)   | 147 (-281, 541)   | 131 (-194, 443)   | -046 (-332, 232)  | -082 (-493, 311)       | Laser             | 077 (-438, 584)   |
| 036 (-529, 618)   | 147 (-424, 732)   | 055 (-335, 436)   | 113 (-446, 699)   | 067 (-538, 672)   | 057 (-491, 614)   | -124 (-650, 402)  | -158 (-769, 451)       | -077 (-584, 438)  | N-acetylcysteine  |
| 112 (-382, 623)   | 227 (-272, 735)   | 131 (-330, 597)   | 195 (-297, 692)   | 151 (-382, 678)   | 133 (-313, 597)   | -045 (-463, 400)  | -078 (-592, 455)       | 001 (-388, 428)   | 078 (-531, 683)   |
| -196 (-526, 129)  | -085 (-423, 265)  | -178 (-455, 096)  | -116 (-438, 207)  | -160 (-539, 206)  | -175 (-438, 095)  | -355 (-590, -113) | -390 (-753, -023)      | -308 (-481, -119) | -231 (-706, 240)  |
| 170 (-359, 682)   | 282 (-230, 767)   | 188 (-337, 694)   | 247 (-223, 704)   | 202 (-397, 774)   | 189 (-338, 676)   | 012 (-471, 475)   | -026 (-618, 533)       | 057 (-406, 509)   | 138 (-527, 760)   |
| -147 (-657, 369)  | -034 (-549, 504)  | -131 (-605, 349)  | -065 (-568, 454)  | -111 (-661, 420)  | -128 (-600, 352)  | -304 (-753, 159)  | -343 (-870, 196)       | -260 (-676, 185)  | -180 (-790, 426)  |
| 054 (-351, 472)   | 172 (-248, 590)   | 074 (-306, 441)   | 135 (-259, 544)   | 089 (-357, 542)   | 075 (-298, 450)   | -102 (-392, 193)  | -137 (-598, 304)       | -055 (-356, 254)  | 021 (-502, 552)   |
| 067 (-508, 639)   | 181 (-399, 776)   | 084 (-310, 476)   | 148 (-427, 729)   | 101 (-518, 704)   | 091 (-467, 633)   | -089 (-624, 447)  | -125 (-735, 475)       | -046 (-553, 478)  | 029 (-517, 584)   |
| -069 (-420, 270)  | 044 (-275, 360)   | -051 (-397, 288)  | 011 (-245, 264)   | -033 (-466, 392)  | -051 (-377, 284)  | -225 (-507, 047)  | -263 (-694, 152)       | -180 (-403, 052)  | -102 (-629, 413)  |
| -724 (-1578, 188) | -608 (-1487, 327) | -701 (-1571, 192) | -639 (-1505, 230) | -688 (-1568, 233) | -700 (-1557, 203) | -882 (-1719, 014) | -916 (-1813, 015)      | -832 (-1660, 064) | -749 (-1712, 225) |

|                      |                      |                      |                      |                      |                      |                      |                     |
|----------------------|----------------------|----------------------|----------------------|----------------------|----------------------|----------------------|---------------------|
| -1.12 (-6.23, 3.82)  | 1.96 (-1.29, 5.26)   | -1.70 (-6.82, 3.59)  | 1.47 (-3.69, 6.57)   | -0.54 (-4.72, 3.51)  | -0.67 (-6.39, 5.08)  | 0.69 (-2.70, 4.20)   | 7.24 (-1.88, 15.78) |
| -2.27 (-7.35, 2.72)  | 0.85 (-2.65, 4.23)   | -2.82 (-7.67, 2.30)  | 0.34 (-5.04, 5.49)   | -1.72 (-5.90, 2.48)  | -1.81 (-7.76, 3.99)  | -0.44 (-3.60, 2.75)  | 6.08 (-3.27, 14.87) |
| -1.31 (-5.97, 3.30)  | 1.78 (-0.96, 4.55)   | -1.88 (-6.94, 3.37)  | 1.31 (-3.49, 6.05)   | -0.74 (-4.41, 3.06)  | -0.84 (-4.76, 3.10)  | 0.51 (-2.88, 3.97)   | 7.01 (-1.92, 15.71) |
| -1.95 (-6.92, 2.97)  | 1.16 (-2.07, 4.38)   | -2.47 (-7.04, 2.23)  | 0.65 (-4.54, 5.68)   | -1.35 (-5.44, 2.59)  | -1.48 (-7.29, 4.27)  | -0.11 (-2.64, 2.45)  | 6.39 (-2.90, 15.05) |
| -1.51 (-6.78, 3.82)  | 1.60 (-2.06, 5.39)   | -2.02 (-7.74, 3.97)  | 1.11 (-4.20, 6.61)   | -0.89 (-5.42, 3.57)  | -1.01 (-7.04, 5.18)  | 0.33 (-3.92, 4.66)   | 6.88 (-2.53, 15.68) |
| -1.33 (-5.97, 3.13)  | 1.75 (-0.95, 4.38)   | -1.89 (-6.76, 3.38)  | 1.28 (-3.52, 6.00)   | -0.75 (-4.50, 2.98)  | -0.91 (-6.33, 4.67)  | 0.51 (-2.84, 3.77)   | 7.00 (-2.03, 15.57) |
| 0.45 (-4.00, 4.63)   | 3.55 (1.13, 5.90)    | -0.12 (-4.75, 4.71)  | 3.04 (-1.59, 7.53)   | 1.02 (-1.93, 3.92)   | 0.89 (-4.47, 6.24)   | 2.25 (-0.47, 5.07)   | 8.82 (-0.14, 17.19) |
| 0.78 (-4.55, 5.92)   | 3.90 (0.23, 7.53)    | 0.26 (-5.33, 6.18)   | 3.43 (-1.96, 8.70)   | 1.37 (-3.04, 5.98)   | 1.25 (-4.75, 7.35)   | 2.63 (-1.52, 6.94)   | 9.16 (-0.15, 18.13) |
| -0.01 (-4.28, 3.88)  | 3.08 (1.19, 4.81)    | -0.57 (-5.03, 4.06)  | 2.60 (-1.85, 6.76)   | 0.55 (-2.54, 3.56)   | 0.46 (-4.78, 5.53)   | 1.80 (-0.52, 4.03)   | 8.32 (-0.64, 16.60) |
| -0.78 (-6.83, 5.31)  | 2.31 (-2.40, 7.06)   | -1.38 (-7.60, 5.27)  | 1.80 (-4.26, 7.90)   | -0.21 (-5.52, 5.02)  | -0.29 (-5.84, 5.17)  | 1.02 (-4.13, 6.29)   | 7.49 (-2.25, 17.12) |
| Pencilin             | 3.09 (-0.59, 6.84)   | -0.55 (-6.18, 5.34)  | 2.63 (-2.93, 7.93)   | 0.58 (-3.91, 5.01)   | 0.47 (-5.53, 6.50)   | 1.84 (-2.31, 6.11)   | 8.34 (-1.08, 17.23) |
|                      | Placebo              | -3.65 (-7.85, 0.89)  | -0.47 (-4.45, 3.37)  | -2.53 (-5.05, 0.08)  | -2.63 (-7.39, 2.20)  | -1.28 (-3.26, 0.77)  | 5.23 (-3.48, 13.40) |
| -3.09 (-6.84, 0.59)  | Placebo              | Probiotics           | 3.11 (-2.90, 8.88)   | 1.11 (-4.06, 6.09)   | 1.01 (-5.54, 7.36)   | 2.38 (-1.61, 6.18)   | 8.88 (-1.03, 18.07) |
| 0.55 (-5.34, 6.18)   |                      |                      | Prostaglandin E2     | -2.03 (-6.67, 2.76)  | -2.16 (-8.41, 4.01)  | -0.78 (-5.12, 3.72)  | 5.71 (-3.54, 14.75) |
| -2.63 (-7.93, 2.93)  | 0.47 (-3.37, 4.45)   | -3.11 (-8.88, 2.90)  | Prostaglandin E2     | Silver nitrate       | Sucralose            | Triamcinolone        | Zinc                |
| -0.58 (-5.01, 3.91)  | 2.53 (-0.08, 5.05)   | -1.11 (-6.09, 4.06)  |                      |                      |                      |                      |                     |
| -0.47 (-6.50, 5.53)  | 2.63 (-2.20, 7.39)   | -1.01 (-7.36, 5.54)  | 2.16 (-4.01, 8.41)   | 0.09 (-5.37, 5.57)   | Sucralose            | 1.39 (-3.86, 6.65)   | 7.89 (-2.04, 17.34) |
| -1.84 (-6.11, 2.31)  | 1.28 (-0.77, 3.26)   | -2.38 (-6.18, 1.61)  | 0.78 (-3.72, 5.12)   | -1.23 (-4.41, 1.87)  |                      | Triamcinolone        | Zinc                |
| -8.34 (-17.23, 1.08) | -5.23 (-13.40, 3.48) | -8.88 (-18.07, 1.03) | -5.71 (-14.75, 3.54) | -7.82 (-16.25, 1.24) | -7.89 (-17.34, 2.04) | -6.49 (-14.86, 2.44) |                     |

## Rank probability

Rank 1 is worst, rank N is best.

| Drug                   | Rank 1 | Rank 2 | Rank 3 | Rank 4 | Rank 5 | Rank 6 | Rank 7 | Rank 8 | Rank 9 | Rank 10 | Rank 11 | Rank 12 | Rank 13 | Rank 14 | Rank 15 | Rank 16 | Rank 17 | Rank 18 |
|------------------------|--------|--------|--------|--------|--------|--------|--------|--------|--------|---------|---------|---------|---------|---------|---------|---------|---------|---------|
| Aloe                   | 0      | 0.03   | 0.05   | 0.05   | 0.06   | 0.07   | 0.07   | 0.08   | 0.08   | 0.08    | 0.08    | 0.08    | 0.07    | 0.06    | 0.05    | 0.05    | 0.04    | 0.02    |
| Chitosan               | 0.03   | 0.14   | 0.11   | 0.11   | 0.1    | 0.09   | 0.08   | 0.07   | 0.06   | 0.05    | 0.04    | 0.04    | 0.03    | 0.02    | 0.02    | 0.01    | 0.01    | 0       |
| Chlorhexidine          | 0      | 0.02   | 0.04   | 0.06   | 0.07   | 0.08   | 0.09   | 0.09   | 0.1    | 0.09    | 0.09    | 0.08    | 0.06    | 0.05    | 0.04    | 0.02    | 0.01    | 0       |
| Curcumin               | 0.02   | 0.08   | 0.09   | 0.09   | 0.09   | 0.1    | 0.1    | 0.08   | 0.07   | 0.06    | 0.05    | 0.04    | 0.04    | 0.03    | 0.02    | 0.01    | 0.01    | 0       |
| Doxycycline            | 0.02   | 0.08   | 0.07   | 0.07   | 0.07   | 0.07   | 0.07   | 0.07   | 0.07   | 0.06    | 0.06    | 0.06    | 0.05    | 0.05    | 0.04    | 0.04    | 0.03    | 0.02    |
| Glycyrrhiza            | 0.01   | 0.03   | 0.04   | 0.06   | 0.07   | 0.08   | 0.09   | 0.09   | 0.09   | 0.09    | 0.08    | 0.07    | 0.06    | 0.05    | 0.04    | 0.03    | 0.02    | 0.01    |
| Honey                  | 0      | 0      | 0      | 0      | 0      | 0.01   | 0.01   | 0.02   | 0.03   | 0.04    | 0.06    | 0.07    | 0.09    | 0.12    | 0.14    | 0.17    | 0.15    | 0.09    |
| Insulin -liposomal gel | 0      | 0.01   | 0.01   | 0.01   | 0.01   | 0.02   | 0.02   | 0.02   | 0.03   | 0.04    | 0.04    | 0.05    | 0.06    | 0.07    | 0.09    | 0.12    | 0.17    | 0.24    |
| Laser                  | 0      | 0      | 0      | 0      | 0      | 0.01   | 0.02   | 0.03   | 0.04   | 0.06    | 0.08    | 0.11    | 0.14    | 0.15    | 0.15    | 0.11    | 0.07    | 0.03    |
| N-acetylcysteine       | 0.02   | 0.06   | 0.05   | 0.05   | 0.05   | 0.05   | 0.05   | 0.05   | 0.05   | 0.06    | 0.05    | 0.06    | 0.05    | 0.06    | 0.06    | 0.07    | 0.08    | 0.09    |
| Penicillin             | 0      | 0.01   | 0.02   | 0.02   | 0.03   | 0.03   | 0.04   | 0.04   | 0.04   | 0.05    | 0.06    | 0.07    | 0.08    | 0.08    | 0.09    | 0.1     | 0.12    | 0.11    |
| Placebo                | 0.02   | 0.2    | 0.28   | 0.23   | 0.14   | 0.08   | 0.03   | 0.02   | 0.01   | 0       | 0       | 0       | 0       | 0       | 0       | 0       | 0       | 0       |
| Probiotics             | 0      | 0.01   | 0.02   | 0.01   | 0.02   | 0.02   | 0.03   | 0.03   | 0.04   | 0.04    | 0.05    | 0.05    | 0.06    | 0.06    | 0.08    | 0.1     | 0.14    | 0.23    |
| Prostaglandin E2       | 0.05   | 0.22   | 0.12   | 0.09   | 0.08   | 0.07   | 0.06   | 0.05   | 0.05   | 0.04    | 0.04    | 0.03    | 0.02    | 0.02    | 0.02    | 0.02    | 0.01    | 0.01    |
| Silver nitrate         | 0      | 0.01   | 0.01   | 0.02   | 0.03   | 0.04   | 0.05   | 0.07   | 0.08   | 0.09    | 0.09    | 0.11    | 0.11    | 0.1     | 0.08    | 0.06    | 0.04    | 0.02    |
| Sucralate              | 0.01   | 0.05   | 0.04   | 0.04   | 0.04   | 0.04   | 0.04   | 0.05   | 0.05   | 0.05    | 0.06    | 0.05    | 0.06    | 0.06    | 0.07    | 0.07    | 0.1     | 0.12    |
| Triamcinolone          | 0      | 0.01   | 0.04   | 0.08   | 0.12   | 0.14   | 0.15   | 0.13   | 0.11   | 0.08    | 0.06    | 0.03    | 0.02    | 0.01    | 0       | 0       | 0       | 0       |
| Zinc                   | 0.81   | 0.05   | 0.02   | 0.02   | 0.01   | 0.01   | 0.01   | 0.01   | 0.01   | 0.01    | 0.01    | 0.01    | 0       | 0       | 0.01    | 0       | 0.01    | 0.01    |

### Consistency check

| Parameter                         | Median (95% CI)   |
|-----------------------------------|-------------------|
| Random Effects Standard Deviation | 1.66 (1.01, 2.96) |

### Convergence Diagnostics

Convergence is assessed using the Brooks-Gelman-Rubin method. This method compares within-chain and between-chain variance to calculate the Potential Scale Reduction Factor (PSRF). A PSRF close to one indicates approximate convergence has been reached.

| Parameter                       | PSRF |
|---------------------------------|------|
| d.Aloe.Chitosan                 | 1.00 |
| d.Chlorhexidine.Nacetylcysteine | 1.00 |
| d.Chlorhexidine.Sucralfate      | 1.00 |
| d.Placebo.Aloe                  | 1.00 |
| d.Placebo.Chlorhexidine         | 1.00 |
| d.Placebo.Doxycycline           | 1.00 |
| d.Placebo.Glycyrrhiza           | 1.00 |
| d.Placebo.Honey                 | 1.00 |
| d.Placebo.Insulinliposomalgel   | 1.00 |
| d.Placebo.Laser                 | 1.00 |
| d.Placebo.Penicillin            | 1.00 |
| d.Placebo.ProstaglandinE2       | 1.00 |
| d,Placebo.Silvernitrate         | 1.00 |
| d.Placebo.Triamcinolone         | 1.00 |
| d.Placebo.Zinc                  | 1.00 |
| d.Triamcinolone.Curcumin        | 1.00 |
| d.Triamcinolone.Probiotics      | 1.00 |
| sd.d                            | 1.00 |

Number of chains : 4  
Tuning iterations : 20,000  
Simulation iterations : 50,000  
Thinning interval : 10  
Inference samples : 10,000  
Variance scaling factor : 2.5

2.Inconsistency Model

Summary estimates for Healing effect

The estimate values for healing effect are given as mean difference (MD) and 95% confidence interval (CI). The table shows the pooled estimates based on the network meta-analysis during the treatment period for each study.

|                      |                    |                      |                      |                      |                       |                       |                       |                      |                      |
|----------------------|--------------------|----------------------|----------------------|----------------------|-----------------------|-----------------------|-----------------------|----------------------|----------------------|
| Aloe                 | 1.01 (-2.48, 4.58) | -0.16 (-5.23, 4.88)  | 0.62 (-4.33, 5.44)   | 0.13 (-5.71, 5.88)   | -0.04 (-5.19, 4.80)   | -1.80 (-6.56, 2.80)   | -2.21 (-8.00, 3.27)   | -1.49 (-6.10, 3.13)  | -0.63 (-7.18, 5.97)  |
| -1.01 (-4.58, 2.48)  | Chitosan           | -1.17 (-6.08, 3.81)  | -0.44 (-4.95, 3.95)  | -0.88 (-6.57, 4.47)  | -1.12 (-5.94, 3.65)   | -2.82 (-7.32, 1.45)   | -3.25 (-8.70, 2.17)   | -2.54 (-6.76, 1.81)  | -1.66 (-8.04, 4.76)  |
| 0.16 (-4.88, 5.29)   | Chitinexdite       | 0.74 (-3.96, 5.56)   | 0.25 (-4.67, 5.10)   | 0.04 (-3.99, 4.10)   | -1.68 (-5.60, 2.27)   | -2.11 (-6.95, 2.89)   | -1.37 (-4.94, 2.37)   | -0.50 (-4.47, 3.64)  |                      |
| -0.62 (-5.44, 4.33)  | Cucurum            | -0.74 (-5.56, 3.96)  | -0.48 (-6.01, 4.91)  | -0.70 (-5.18, 3.99)  | -2.39 (-6.55, 1.70)   | -2.83 (-8.25, 2.57)   | -2.09 (-6.01, 1.88)   | -1.21 (-7.62, 4.97)  |                      |
| -0.13 (-5.88, 5.71)  |                    | 0.48 (-4.91, 6.01)   | Doxycyline           | -0.19 (-4.95, 4.73)  | -1.94 (-6.58, 2.79)   | -2.35 (-7.71, 3.25)   | -1.63 (-5.91, 2.97)   | -0.75 (-7.05, 5.68)  |                      |
| 0.04 (-4.80, 5.19)   |                    | 1.12 (-3.65, 5.94)   | 0.19 (-4.73, 4.95)   | Glycyrrhiza          | -1.73 (-5.51, 2.04)   | -2.18 (-6.81, 2.58)   | -1.42 (-4.84, 2.01)   | -0.52 (-6.24, 5.17)  |                      |
| 1.80 (-2.80, 6.56)   |                    | 2.82 (-1.45, 7.32)   | 1.94 (-2.79, 6.56)   | Honey                | -0.42 (-5.11, 4.27)   | 0.32 (-2.74, 3.59)    | 1.24 (-4.52, 6.85)    |                      |                      |
| 2.21 (-3.27, 8.00)   |                    | 3.25 (-2.17, 8.70)   | 2.83 (-2.57, 8.25)   |                      | Inulin- liposomal gel | 0.73 (-3.55, 5.11)    | 1.61 (-4.74, 8.01)    |                      |                      |
| 1.49 (-3.13, 6.10)   |                    | 2.54 (-1.81, 6.76)   | 2.09 (-1.88, 6.01)   | 1.63 (-2.97, 5.91)   | 1.42 (-2.01, 4.84)    | -0.32 (-3.59, 2.74)   | -0.73 (-5.11, 3.55)   | Laser                | 0.89 (-4.64, 6.24)   |
| 0.63 (-5.97, 7.18)   |                    | 1.66 (-4.76, 8.04)   | 1.21 (-4.97, 7.62)   | 0.75 (-5.68, 7.05)   | 0.52 (-5.17, 6.24)    | -1.24 (-6.85, 4.52)   | -1.61 (-8.01, 4.74)   | N-acetylcysteine     |                      |
| 1.44 (-4.20, 7.28)   |                    | 2.49 (-2.97, 8.09)   | 2.07 (-3.35, 7.47)   | 1.61 (-3.91, 7.06)   | 1.40 (-3.32, 6.20)    | -0.34 (-4.97, 4.22)   | -0.79 (-6.21, 4.75)   | -0.04 (-4.22, 4.43)  | 0.84 (-5.51, 7.12)   |
| -2.05 (-5.66, 1.47)  |                    | -0.64 (-4.50, 3.29)  | -1.80 (-4.70, 1.17)  | -1.54 (-5.48, 2.33)  | -1.74 (-4.54, 1.09)   | -3.48 (-6.00, -0.85)  | -3.90 (-7.65, -0.07)  | -3.16 (-5.05, -1.09) | -2.25 (-7.30, 2.73)  |
| 1.87 (-3.96, 7.77)   |                    | 2.93 (-2.49, 8.33)   | 1.76 (-3.74, 7.53)   | 2.02 (-4.25, 8.24)   | 1.80 (-3.61, 7.68)    | 0.09 (-4.95, 5.30)    | -0.35 (-6.58, 5.89)   | 0.39 (-4.51, 5.67)   | 1.26 (-5.59, 8.35)   |
| -1.18 (-6.94, 4.79)  |                    | -0.14 (-5.85, 5.61)  | -1.28 (-6.38, 3.74)  | -1.05 (-6.71, 4.56)  | -1.23 (-6.14, 3.76)   | -2.97 (-7.87, 1.87)   | -3.43 (-9.00, 2.24)   | -2.67 (-7.17, 2.01)  | -1.81 (-8.29, 4.73)  |
| 0.90 (-4.07, 6.28)   |                    | 1.94 (-2.94, 6.95)   | 1.52 (-3.14, 6.34)   | 1.03 (-4.03, 5.99)   | 0.85 (-3.37, 5.01)    | -1.03 (-4.27, 2.26)   | -1.32 (-6.18, 3.72)   | -0.58 (-4.15, 3.15)  | 0.30 (-5.63, 6.20)   |
| 0.97 (-5.58, 7.65)   |                    | 2.01 (-4.55, 8.46)   | 0.83 (-3.37, 5.04)   | 1.09 (-5.48, 7.55)   | 0.87 (-4.97, 6.76)    | -0.85 (-6.70, 4.87)   | -1.28 (-7.87, 5.15)   | -0.55 (-6.17, 5.07)  | 0.34 (-5.51, 6.14)   |
| -0.47 (-4.47, 3.66)  |                    | 0.56 (-2.90, 4.01)   | -0.60 (-4.48, 3.35)  | -0.34 (-5.14, 4.24)  | -0.53 (-4.21, 3.22)   | -2.26 (-5.35, 0.76)   | -2.69 (-7.26, 1.88)   | -1.66 (-4.45, 1.36)  | -1.08 (-6.78, 4.59)  |
| -6.82 (-16.07, 2.44) |                    | -5.79 (-14.87, 3.19) | -6.95 (-15.84, 1.71) | -6.70 (-15.91, 2.23) | -6.87 (-15.65, 1.76)  | -8.62 (-17.39, -0.01) | -9.10 (-18.19, -0.05) | -8.31 (-16.94, 0.06) | -7.44 (-17.34, 2.22) |



|                      |                      |                      |                      |                      |                      |                      |                     |
|----------------------|----------------------|----------------------|----------------------|----------------------|----------------------|----------------------|---------------------|
| -1.44 (-7.28, 4.20)  | 2.05 (-1.47, 5.66)   | -1.87 (-7.77, 3.96)  | 1.18 (-4.79, 6.94)   | -0.90 (-6.28, 4.07)  | -0.97 (-7.65, 5.58)  | 0.47 (-3.66, 4.47)   | 6.82 (-2.44, 16.07) |
| -2.49 (-8.09, 2.97)  | 0.64 (-3.29, 4.50)   | -2.93 (-8.33, 2.49)  | 0.14 (-5.61, 5.85)   | -1.94 (-6.95, 2.94)  | -2.01 (-8.46, 4.55)  | -0.56 (-4.01, 2.90)  | 5.79 (-3.19, 14.87) |
| -1.33 (-6.25, 3.47)  | 1.80 (-1.17, 4.70)   | -1.76 (-7.53, 3.74)  | 1.28 (-3.74, 6.38)   | -0.81 (-5.02, 3.41)  | -0.83 (-5.04, 3.37)  | 0.60 (-3.35, 4.46)   | 6.95 (-1.71, 15.64) |
| -2.07 (-7.47, 3.35)  | 1.06 (-2.72, 4.74)   | -2.49 (-7.47, 2.33)  | 0.58 (-4.86, 6.08)   | -1.52 (-6.34, 3.14)  | -1.60 (-7.75, 4.93)  | -0.15 (-2.89, 2.63)  | 6.22 (-2.77, 15.20) |
| -1.61 (-7.06, 3.91)  | 1.54 (-2.33, 5.48)   | -2.02 (-8.24, 4.25)  | 1.05 (-4.56, 6.71)   | -1.03 (-5.99, 4.03)  | -1.09 (-7.55, 5.48)  | 0.34 (-4.24, 5.14)   | 6.70 (-2.23, 15.91) |
| -1.40 (-6.20, 3.32)  | 1.74 (-1.09, 4.54)   | -1.80 (-7.68, 3.61)  | 1.23 (-3.76, 6.14)   | -0.85 (-5.01, 3.37)  | -0.87 (-6.76, 4.97)  | 0.53 (-3.22, 4.21)   | 6.87 (-1.76, 15.65) |
| 0.34 (-4.22, 4.97)   | 3.48 (0.85, 6.00)    | -0.09 (-5.30, 4.95)  | 2.97 (-1.87, 7.87)   | 1.03 (-2.26, 4.27)   | 0.85 (-4.87, 6.70)   | 2.26 (-0.76, 5.35)   | 8.62 (0.01, 17.39)  |
| 0.79 (-4.75, 6.21)   | 3.90 (0.07, 7.65)    | 0.35 (-5.89, 6.58)   | 3.43 (-2.24, 9.00)   | 1.32 (-3.72, 6.18)   | 1.28 (-5.15, 7.87)   | 2.69 (-1.88, 7.26)   | 9.10 (0.05, 18.19)  |
| 0.04 (-4.43, 4.22)   | 3.16 (1.09, 5.05)    | -0.39 (-5.67, 4.51)  | 2.67 (-2.01, 7.17)   | 0.58 (-3.15, 4.15)   | 0.55 (-5.07, 6.17)   | 1.66 (-1.36, 4.45)   | 8.31 (-0.06, 16.94) |
| -0.84 (-7.12, 5.51)  | 2.25 (-2.73, 7.30)   | -1.26 (-8.35, 5.59)  | 1.81 (-4.73, 8.29)   | -0.30 (-6.20, 5.63)  | -0.34 (-6.14, 5.51)  | 1.08 (-4.59, 6.78)   | 7.44 (-2.22, 17.34) |
| Penicillin           | 3.13 (-0.73, 7.08)   | -0.43 (-6.74, 5.76)  | 2.62 (-3.02, 8.24)   | 0.53 (-4.36, 5.56)   | 0.51 (-5.92, 7.07)   | 1.94 (-2.73, 6.65)   | 8.32 (-0.74, 17.43) |
| -3.13 (-7.08, 0.79)  | Placebo              | -3.55 (-8.51, 1.21)  | -0.51 (-4.55, 3.63)  | -2.59 (-5.64, 0.48)  | -2.62 (-7.70, 2.69)  | -1.07 (-3.76, 1.99)  | 5.13 (-2.97, 13.59) |
| 0.43 (-5.76, 6.74)   | 3.55 (-1.21, 8.51)   | Probiotics           | 3.09 (-3.28, 9.52)   | 0.96 (-4.51, 6.63)   | 0.94 (-6.02, 8.11)   | 2.35 (-1.73, 6.49)   | 8.72 (-0.63, 18.29) |
| -2.62 (-8.24, 3.02)  | 0.51 (-3.63, 4.55)   | -3.09 (-9.52, 3.28)  | Prostaglandin E2     | -2.11 (-7.19, 3.13)  | -2.12 (-8.71, 4.56)  | -0.69 (-5.45, 3.98)  | 5.59 (-3.31, 15.02) |
| -0.53 (-5.56, 4.36)  | 2.59 (-0.48, 5.64)   | -0.96 (-6.63, 4.51)  | 2.11 (-3.13, 7.19)   | Silver nitrate       | -0.02 (-6.06, 5.97)  | 1.38 (-2.49, 5.29)   | 7.75 (-0.99, 16.60) |
| -0.51 (-7.07, 5.92)  | 2.62 (-2.69, 7.70)   | -0.94 (-8.11, 6.02)  | 2.12 (-4.56, 8.71)   | 0.02 (-5.97, 6.06)   | Succalfac            | 1.46 (-4.55, 7.00)   | 7.71 (-1.86, 17.69) |
| -1.94 (-6.65, 2.73)  | 1.07 (-1.93, 3.76)   | -2.35 (-6.49, 1.73)  | 0.69 (-3.98, 5.45)   | -1.38 (-5.29, 2.49)  | -1.46 (-7.00, 4.55)  | Triamcinolone        | 6.33 (-2.30, 15.11) |
| -8.32 (-17.43, 0.74) | -5.13 (-13.59, 2.97) | -8.72 (-18.29, 0.63) | -5.59 (-15.02, 3.31) | -7.75 (-16.60, 0.99) | -7.71 (-17.68, 1.86) | -6.33 (-15.11, 2.30) | Zinc                |

Inconsistency Factors

|                                               |                     |
|-----------------------------------------------|---------------------|
| Cycle                                         | Median (95% CI)     |
| Aloe, Chitosan, Honey, Placebo, Triamcinolone | -0.13 (-4.40, 2.70) |
| Honey, Laser, Placebo, Triamcinolone          | -0.12 (-3.53, 2.49) |
| Honey, Placebo, Silver nitrate                | -0.05 (-3.19, 2.66) |
| Honey, Placebo, Triamcinolone                 | 0.07 (-2.51, 3.12)  |

## Variance Calculation

| Parameter                         | Median (95% CI)   |
|-----------------------------------|-------------------|
| Random Effects Standard Deviation | 1.74 (1.04, 3.19) |
| Inconsistency Standard Deviation  | 1.25 (0.06, 4.94) |

## Convergence Diagnostics

Convergence is assessed using the Brooks-Gelman-Rubin method. This method compares within-chain and between-chain variance to calculate the Potential Scale Reduction Factor (PSRF). A PSRF close to one indicates approximate convergence has been reached.

| Parameter                                   | PSRF |
|---------------------------------------------|------|
| d.Aloe.Chitosan                             | 1.00 |
| d.Chitosan.Triamcinolone                    | 1.00 |
| d.Chlorhexidine.Nacetylcysteine             | 1.00 |
| d.Chlorhexidine.Sucralfate                  | 1.00 |
| d.Honey.Placebo                             | 1.00 |
| d.Placebo.Chlorhexidine                     | 1.00 |
| d.Placebo.Doxycycline                       | 1.00 |
| d.Placebo.Glycyrrhiza                       | 1.00 |
| d.Placebo.Insulinliposomalgel               | 1.00 |
| d.Placebo.Laser                             | 1.00 |
| d.Placebo.Penicilin                         | 1.00 |
| d.Placebo.ProstaglandinE2                   | 1.00 |
| d.Placebo.Silvernitrate                     | 1.00 |
| d.Placebo.Zinc                              | 1.00 |
| d.Triamcinolone.Curcumin                    | 1.00 |
| d.Triamcinolone.Honey                       | 1.00 |
| d.Triamcinolone.Probiotics                  | 1.00 |
| w.Aloe.Chitosan.Triamcinolone.Honey.Placebo | 1.00 |
| w.Honey.Placebo.Laser.Triamcinolone         | 1.00 |
| w.Honey.Placebo.Sivernitrate                | 1.00 |
| w.Honey.Placebo.Triamcinolone               | 1.00 |
| sd.d                                        | 1.00 |
| sd.w                                        | 1.00 |

Number of chains : 4  
 Tuning iterations : 20,000  
 Simulation iterations : 50,000  
 Thinning interval : 10  
 Inference samples : 10,000  
 Variance scaling factor : 2.5

### 3. Node-splitting analysis

#### Node-splitting analysis of inconsistency

Inconsistency between direct and indirect estimates was estimated in the Node-Splitting Model. When P values is above 0.05 in a comparison, there is evidence of statistical inconsistency.

| Name                    | Direct Effect       | Indirect Effect     | Overall             | P-Value |
|-------------------------|---------------------|---------------------|---------------------|---------|
| Aloe, Chitosan          | 0.53 (-3.52, 4.64)  | 2.55 (-3.37, 8.80)  | 1.15 (-2.06, 4.38)  | 0.55    |
| Aloe, Placebo           | 2.63 (-1.46, 6.74)  | 0.61 (-5.66, 6.72)  | 1.96 (-1.29, 5.26)  | 0.56    |
| Chitosan, Triamcinolone | -1.12 (-5.09, 2.87) | 0.98 (-5.10, 7.03)  | -0.44 (-3.60, 2.75) | 0.55    |
| Honey, Silver nitrate   | 0.52 (-3.45, 4.52)  | 0.64 (-4.23, 5.67)  | 1.02 (-1.93, 3.92)  | 0.96    |
| Honey, Triamcinolone    | 3.17 (-0.67, 7.09)  | 1.73 (-2.02, 5.56)  | 2.25 (-0.47, 5.07)  | 0.55    |
| Laser, Placebo          | 3.28 (1.01, 5.26)   | 2.20 (-2.39, 6.89)  | 3.08 (1.19, 4.81)   | 0.64    |
| Laser, Triamcinolone    | 1.11 (-2.81, 4.98)  | 2.26 (-1.19, 5.37)  | 1.80 (-0.52, 4.03)  | 0.62    |
| Placebo, Triamcinolone  | -1.02 (-3.67, 1.63) | -2.41 (-6.00, 1.23) | -1.28 (-3.26, 0.77) | 0.49    |

### 4. Network structure

#### Network structure of sensitivity analysis

26 RCTs involving 18 local interventions were included in the sensitivity analysis considering the healing effect.

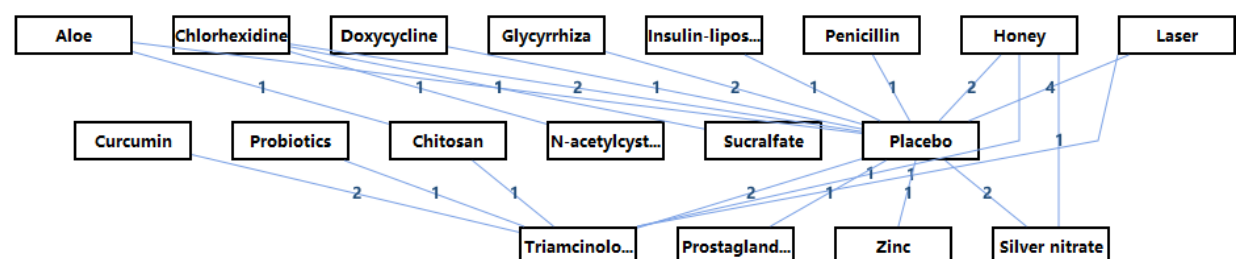

## 5. Pairwise meta-analysis

### Pairwise meta-analysis of healing effect

Healing effect were measured by mean difference (MD) and 95% confidence interval (CI).

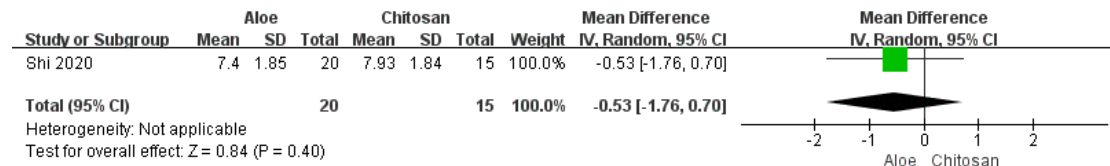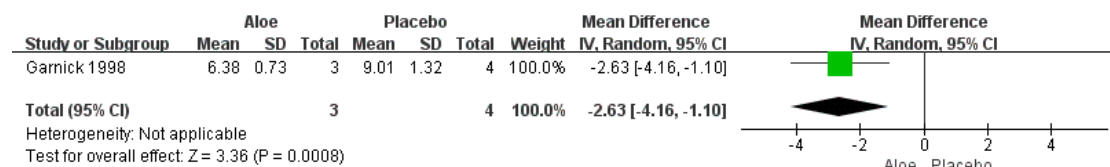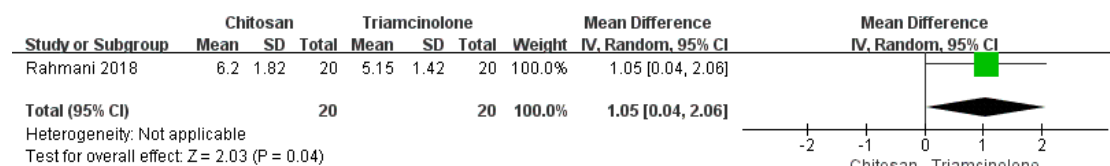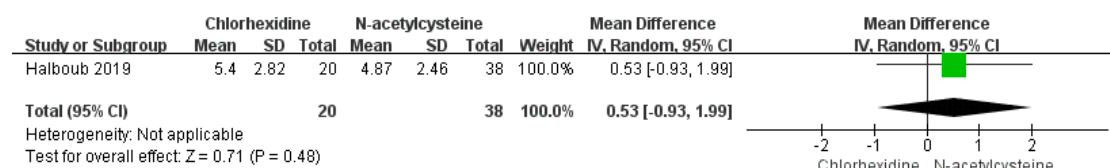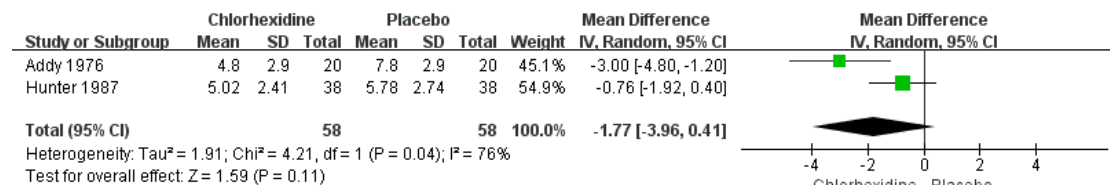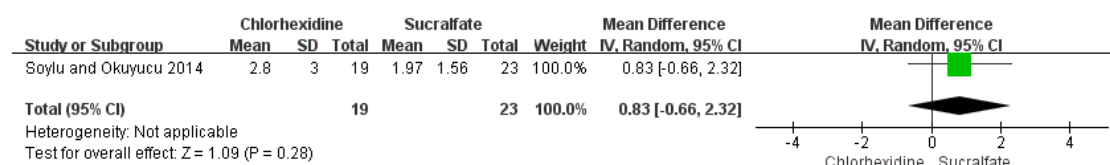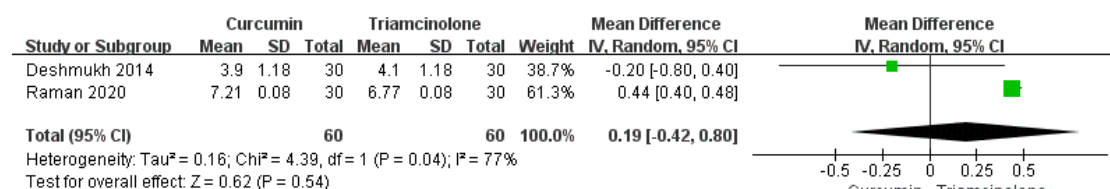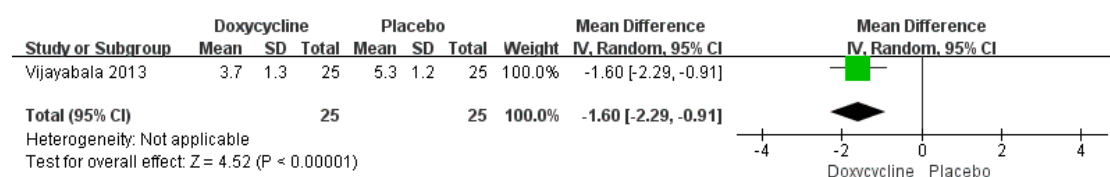

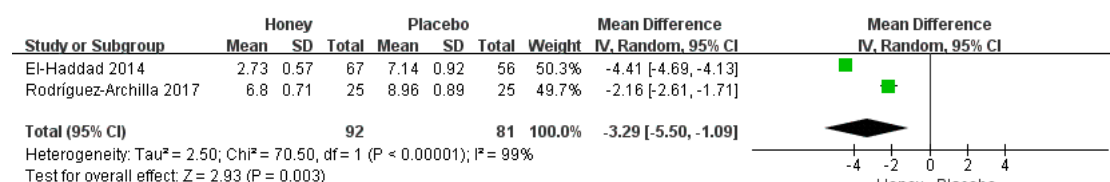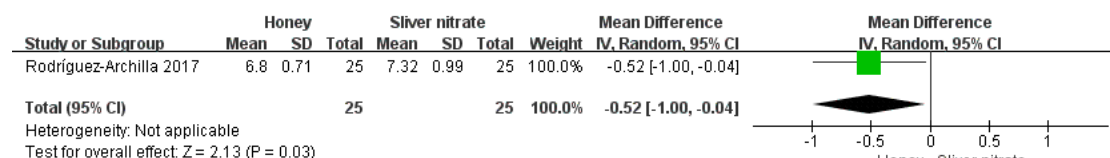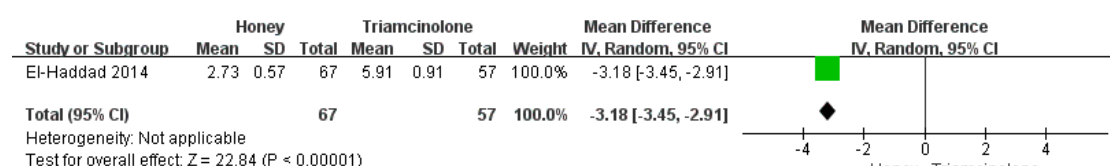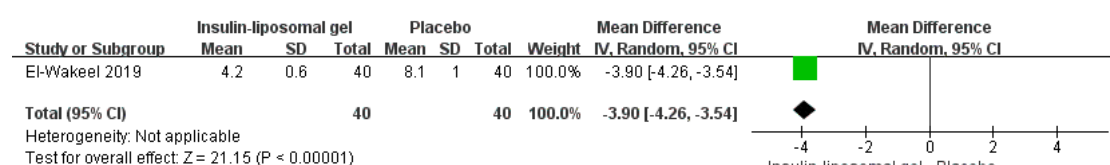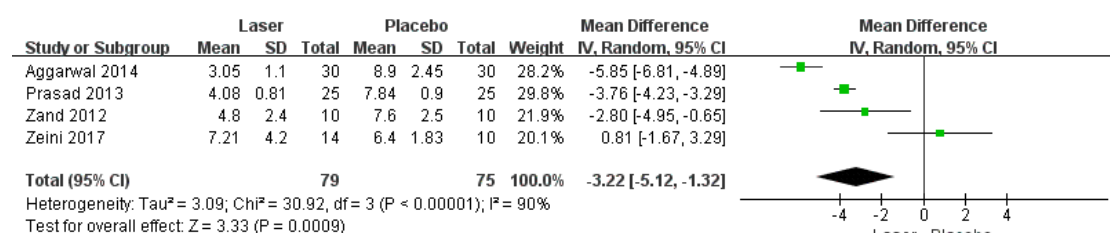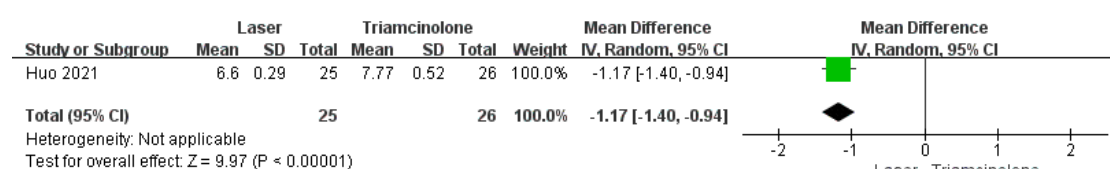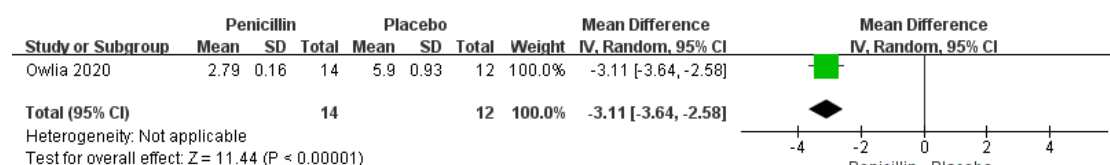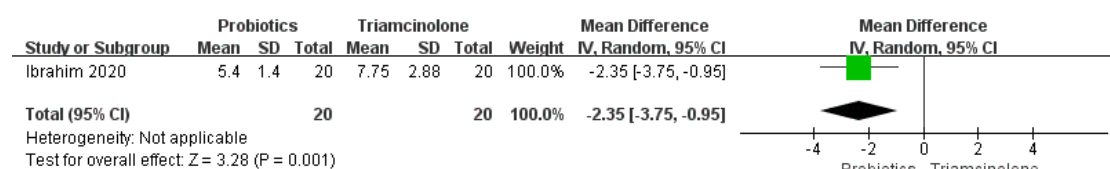

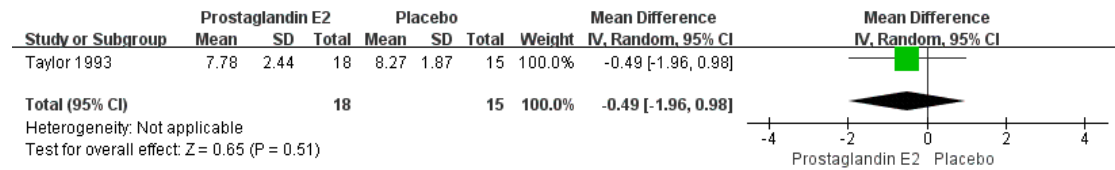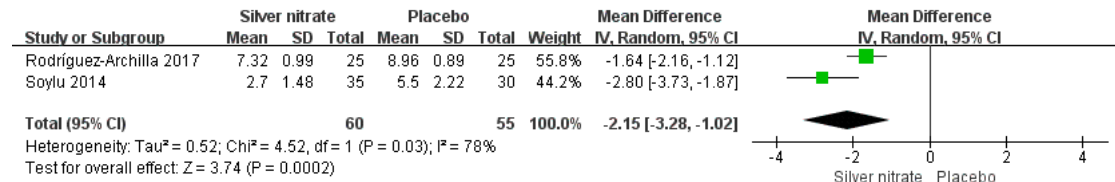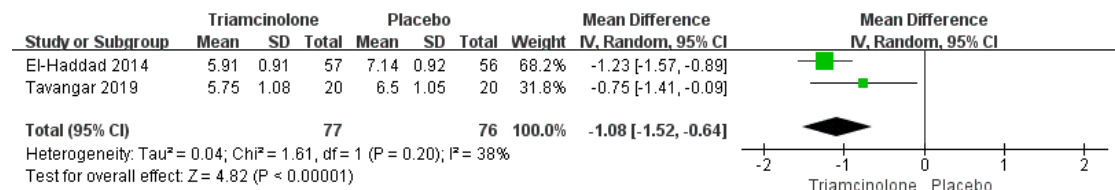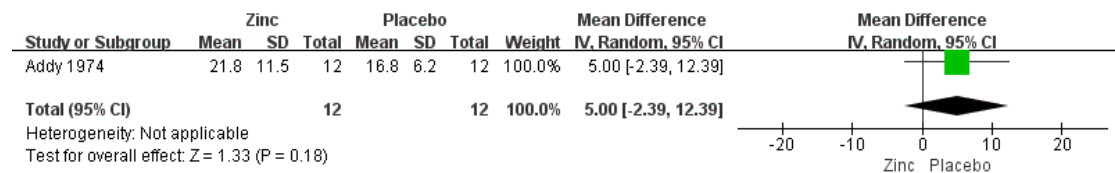

| Comparison               | NO. of included study | Heterogeneity (I <sup>2</sup> ) | Combined effect [MD (95%CI)] |
|--------------------------|-----------------------|---------------------------------|------------------------------|
| Aloe vs                  |                       |                                 |                              |
| Placebo                  | 1                     | NA                              | -2.63 (-4.16, -1.10)         |
| Chitosan                 | 1                     | NA                              | -0.53 (-1.76, 0.70)          |
| Chitosan vs              |                       |                                 |                              |
| Triamcinolone            | 1                     | NA                              | 1.05 (0.04, 2.06)            |
| Chlorhexidine vs         |                       |                                 |                              |
| Placebo                  | 2                     | 76%                             | -1.77 (-3.96, 0.41)          |
| Sucralfate               | 1                     | NA                              | 0.83 (-0.66, 2.32)           |
| N-acetylcysteine         | 1                     | NA                              | 0.53 (-0.93, 1.99)           |
| Curcumin vs              |                       |                                 |                              |
| Triamcinolone            | 2                     | 77%                             | 0.19 (-0.42, 0.80)           |
| Doxycycline vs           |                       |                                 |                              |
| Placebo                  | 1                     | NA                              | -1.60 (-2.29, -0.91)         |
| Glycyrrhiza vs           |                       |                                 |                              |
| Placebo                  | 2                     | 95%                             | -1.72 (-4.77, 1.32)          |
| Honey vs                 |                       |                                 |                              |
| Placebo                  | 2                     | 99%                             | -3.29 (-5.50, -1.09)         |
| Triamcinolone            | 1                     | NA                              | -3.18 (-3.45, -2.91)         |
| Sliver nitrate           | 1                     | NA                              | -0.52 (-1.00, -0.04)         |
| Insulin-liposomal gel vs |                       |                                 |                              |
| Placebo                  | 1                     | NA                              | -3.90 (-4.26, -3.54)         |
| Laser vs                 |                       |                                 |                              |
| Placebo                  | 4                     | 90%                             | -3.22 (-5.12, -1.32)         |
| Triamcinolone            | 1                     | NA                              | -1.17 (-1.40, -0.94)         |
| Penicillin vs            |                       |                                 |                              |
| Placebo                  | 1                     | NA                              | -3.11 (-3.64, -2.58)         |
| Probiotics vs            |                       |                                 |                              |
| Triamcinolone            | 1                     | NA                              | -2.35 (-3.75, -0.95)         |
| Prostaglandin E2 vs      |                       |                                 |                              |
| Placebo                  | 1                     | NA                              | -0.49 (-1.96, 0.98)          |
| Sliver nitrate vs        |                       |                                 |                              |
| Placebo                  | 2                     | 78%                             | -2.15 (-3.28, -1.02)         |
| Triamcinolone vs         |                       |                                 |                              |
| Placebo                  | 2                     | 38%                             | -1.08 (-1.52, -0.64)         |
| Zinc vs                  |                       |                                 |                              |
| Placebo                  | 1                     | NA                              | 5.00 (-2.39, 12.39)          |

MD, mean difference; CI, confidence interval; NA, not applicable.

Chapter S2 Size-reducing effect

1.Consistency Model

Summary estimates for Size-reducing effect

The estimate values for size-reducing effect are given as mean difference (MD) and 95% confidence interval (CI). The table shows the pooled estimates based on the network meta-analysis during the treatment period for each study.

|                         |                        |                       |                        |                         |                         |                         |                        |                        |                         |
|-------------------------|------------------------|-----------------------|------------------------|-------------------------|-------------------------|-------------------------|------------------------|------------------------|-------------------------|
| Aalen                   | -0.03 (-57.26, 57.97)  | 17.88 (-36.40, 72.91) | 7.17 (-65.84, 76.66)   | -1.23 (-72.44, 68.94)   | 15.67 (-75.07, 105.97)  | -29.90 (-101.72, 49.30) | 9.18 (-47.48, 67.26)   | 19.40 (-44.75, 82.21)  | -1.83 (-72.19, 69.65)   |
|                         |                        |                       |                        |                         |                         |                         |                        |                        |                         |
| 0.03 (-57.97, 57.26)    | Alice                  | 17.79 (-16.04, 50.64) | 6.70 (-50.76, 61.33)   | -1.27 (-58.06, 54.29)   | 15.01 (-62.84, 95.69)   | -29.71 (-87.27, 29.15)  | 9.22 (-28.93, 47.25)   | 19.65 (-28.00, 65.65)  | -1.21 (-58.77, 53.84)   |
| -17.88 (-72.90, 38.40)  |                        | Anticoagulation       | -11.00 (-64.44, 41.05) | -19.10 (-71.55, 33.01)  | -2.77 (-79.47, 75.75)   | -47.40 (-102.47, 9.26)  | -8.65 (-41.13, 24.48)  | 1.26 (-35.76, 38.69)   | -19.26 (-72.62, 32.21)  |
| -7.17 (-76.66, 65.84)   | -6.70 (-61.35, 50.76)  | 11.00 (-41.05, 64.44) |                        |                         |                         |                         |                        |                        |                         |
| 1.23 (-68.54, 72.44)    | 12.77 (-54.29, 58.06)  | 19.10 (-33.01, 71.55) | 7.90 (-63.20, 76.61)   | Bleeding episode        | 16.72 (-70.83, 107.87)  | -28.49 (-98.74, 44.52)  | 10.67 (-45.76, 68.50)  | 20.52 (-41.00, 82.58)  | -0.45 (-69.16, 69.34)   |
|                         |                        |                       |                        |                         |                         |                         |                        |                        |                         |
| -15.67 (-105.97, 75.07) | -15.01 (-95.88, 62.94) | 2.77 (-75.05, 79.47)  | -8.49 (-100.94, 80.50) | -16.72 (-107.87, 70.83) | Chest pain              | -45.29 (-135.67, 46.81) | -6.10 (-87.56, 73.60)  | 4.17 (-80.38, 88.73)   | -16.54 (-107.13, 72.53) |
| 29.90 (-43.30, 101.72)  | 29.71 (-29.15, 67.27)  | 47.40 (-9.24, 102.47) | 36.37 (-39.92, 106.70) | 28.49 (-44.52, 98.74)   |                         | Cyclophosphamide        | 38.75 (-19.38, 97.28)  | 49.17 (-14.20, 109.45) | 28.28 (-44.82, 97.76)   |
| -9.18 (-67.26, 47.48)   | -9.32 (-47.25, 28.39)  | 88.65 (-24.48, 41.13) | -2.65 (-59.94, 52.23)  | -10.67 (-68.56, 45.76)  | 6.10 (-73.60, 87.56)    | -38.75 (-97.28, 19.39)  | Cyclophosphamide       | 10.05 (-37.03, 56.45)  | -10.53 (-47.41, 44.51)  |
| -19.40 (-82.51, 44.75)  | -19.65 (-65.65, 26.00) | -1.26 (-38.69, 35.76) | -12.94 (-75.73, 49.24) | -20.52 (-82.58, 41.00)  | -4.17 (-86.73, 80.39)   | -49.17 (-109.45, 14.20) |                        | -10.05 (-56.45, 37.03) | -21.23 (-81.51, 40.77)  |
| 1.83 (-49.65, 72.19)    | 12.1 (-53.84, 58.77)   | 19.26 (-32.21, 72.82) | 8.24 (-63.11, 77.29)   | 0.45 (-49.34, 69.18)    | 16.54 (-72.53, 107.13)  | -28.28 (-97.76, 44.82)  | 10.53 (-44.51, 67.41)  | 21.23 (-40.77, 82.51)  | Dexamethasone           |
| -6.87 (-72.82, 61.31)   | -7.41 (-57.15, 46.00)  | 10.42 (-35.54, 59.21) | -0.60 (-52.36, 52.29)  | -6.88 (-73.71, 58.65)   | 7.99 (-76.67, 96.50)    | -36.67 (-106.40, 34.67) | 1.79 (-46.73, 54.19)   | 11.92 (-44.60, 70.89)  |                         |
| -11.60 (-68.86, 45.73)  | -12.06 (-47.94, 25.67) | 5.83 (-23.74, 37.06)  | -5.04 (-61.23, 49.17)  | -13.43 (-69.33, 41.77)  | 3.40 (-75.63, 83.83)    | -41.42 (-98.62, 18.48)  | -2.65 (-39.55, 35.11)  | 7.39 (-37.22, 52.40)   | -13.49 (-68.04, 42.44)  |
| -10.02 (-46.20, 51.88)  | -10.43 (-46.21, 31.07) | 7.47 (-22.72, 41.98)  | -3.58 (-57.20, 51.58)  | -11.63 (-66.41, 48.12)  | 5.04 (-74.15, 87.29)    | -39.94 (-96.48, 22.29)  | -1.30 (-36.36, 41.11)  | 8.85 (-34.43, 58.31)   | -11.87 (-46.00, 47.10)  |
| 17.22 (-33.32, 67.83)   | 17.23 (-9.23, 45.09)   | 35.59 (-5.53, 54.72)  | 23.99 (-26.13, 73.07)  | 16.12 (-32.96, 64.10)   | 32.51 (-42.22, 107.67)  | -12.55 (-63.50, 40.49)  | 26.41 (-1.26, 54.01)   | 36.62 (-1.38, 74.88)   | 15.97 (-30.50, 63.58)   |
| 2.25 (-56.96, 60.28)    | 2.16 (-35.90, 39.89)   | 20.01 (-13.33, 52.44) | 8.80 (-48.03, 63.31)   | 0.68 (-55.89, 56.08)    | 17.01 (-62.51, 99.12)   | -27.49 (-84.65, 31.88)  | 11.23 (-25.47, 47.39)  | 21.62 (-25.03, 67.18)  | 0.82 (-55.86, 55.23)    |
| -21.38 (-109.18, 66.60) | -21.72 (-96.44, 57.46) | -3.90 (-75.60, 72.00) | -14.18 (-66.32, 38.53) | -22.48 (-107.41, 64.74) | -6.42 (-109.67, 101.42) | -51.12 (-139.16, 38.60) | -12.42 (-88.55, 65.13) | -1.97 (-43.33, 81.20)  | -23.31 (-110.56, 65.25) |
| -8.47 (-63.23, 44.61)   | -8.38 (-40.18, 21.59)  | 9.23 (-16.84, 33.32)  | -2.15 (-54.59, 47.05)  | -9.71 (-63.45, 41.50)   | 6.19 (-71.31, 85.16)    | -38.42 (-92.95, 16.63)  | 0.59 (-24.02, 24.70)   | 10.77 (-31.50, 52.77)  | -10.33 (-43.31, 41.22)  |
| -5.64 (-71.49, 60.99)   | -5.12 (-55.35, 45.43)  | 12.50 (-33.97, 57.97) | 1.12 (-64.27, 65.66)   | -6.54 (-73.94, 57.64)   | 10.30 (-77.01, 97.23)   | -34.83 (-100.23, 32.98) | 3.78 (-44.44, 53.88)   | 13.82 (-42.48, 70.77)  | -7.19 (-71.97, 58.29)   |
| 5.73 (-67.81, 77.73)    | 5.43 (-52.30, 64.10)   | 23.88 (-32.84, 78.05) | 11.95 (-81.04, 84.36)  | 4.75 (-68.54, 74.30)    | 20.72 (-67.66, 111.97)  | -24.90 (-99.17, 52.62)  | 14.51 (-43.67, 72.64)  | 25.16 (-42.26, 89.57)  | 38.1 (-67.65, 75.79)    |



|                        |                       |                        |                         |                        |                        |                        |                        |                         |
|------------------------|-----------------------|------------------------|-------------------------|------------------------|------------------------|------------------------|------------------------|-------------------------|
| 6.97 (-61.31, 72.82)   | 11.80 (-457.3, 69.85) | 10.02 (-50.38, 66.29)  | -1.72 (-67.83, 33.32)   | -2.25 (-60.28, 56.96)  | 21.38 (-66.60, 109.18) | 8.47 (-446.1, 63.29)   | 5.64 (-60.98, 71.49)   | -5.73 (-77.73, 67.81)   |
| 7.41 (-46.00, 57.15)   | 12.06 (-25.67, 47.94) | 10.43 (-30.07, 46.21)  | -1.73 (-45.09, 9.23)    | -2.16 (-39.89, 35.90)  | 21.72 (-57.46, 96.44)  | 8.98 (-215.9, 40.18)   | 5.12 (-45.43, 55.95)   | -5.43 (-64.10, 52.30)   |
| -10.4 (-59.21, 35.54)  | -5.83 (-37.06, 23.74) | -7.47 (-41.98, 22.72)  | -35.29 (-54.72, -15.59) | -20.01 (-52.44, 13.35) | 3.90 (-72.00, 75.60)   | -9.29 (-33.32, 16.84)  | -12.50 (-57.97, 33.97) | -23.68 (-78.05, 32.84)  |
| 0.00 (-52.29, 52.98)   | 5.04 (-49.17, 61.23)  | 3.98 (-51.99, 57.20)   | -23.99 (-73.07, 26.19)  | -8.80 (-63.31, 46.03)  | 14.18 (-36.53, 66.32)  | 2.15 (-47.05, 54.59)   | -1.12 (-65.66, 64.27)  | -11.95 (-84.36, 61.04)  |
| 8.89 (-58.65, 73.71)   | 13.43 (-41.77, 69.33) | 11.63 (-48.12, 66.41)  | -16.12 (-64.10, 32.96)  | -0.88 (-56.08, 55.89)  | 22.48 (-64.74, 107.41) | 9.71 (-415.0, 63.45)   | 6.54 (-57.64, 73.34)   | -4.79 (-74.30, 68.54)   |
| -7.99 (-98.59, 76.67)  | -3.40 (-83.83, 75.63) | -5.04 (-87.38, 74.15)  | -32.51 (-107.67, 42.22) | -17.01 (-99.12, 62.51) | 6.42 (-101.42, 109.67) | -6.19 (-85.16, 71.31)  | -10.30 (-97.23, 77.01) | -20.72 (-111.97, 67.66) |
| 36.67 (-34.67, 105.60) | 41.42 (-18.48, 96.62) | 39.94 (-22.29, 96.48)  | 12.25 (-40.49, 63.50)   | 27.19 (-31.88, 84.85)  | 51.12 (-38.60, 139.16) | 38.42 (-16.63, 92.95)  | 34.93 (-32.98, 103.23) | 24.90 (-52.62, 99.17)   |
| -1.79 (-54.19, 46.73)  | 2.65 (-35.11, 39.55)  | 1.30 (-41.11, 36.38)   | -26.41 (-54.91, 1.26)   | -11.23 (-47.35, 25.47) | 12.42 (-65.13, 86.55)  | -0.59 (-24.70, 24.02)  | -3.78 (-53.68, 44.44)  | -14.51 (-72.64, 43.67)  |
| -11.92 (-70.89, 44.60) | -7.39 (-52.40, 37.22) | -8.65 (-58.31, 34.43)  | -36.62 (-74.65, 1.39)   | -21.62 (-67.18, 25.03) | 1.97 (-81.20, 83.33)   | -10.77 (-52.17, 31.50) | -13.82 (-70.77, 42.48) | -25.16 (-89.87, 42.26)  |
| 8.70 (-56.76, 74.11)   | 13.48 (-42.64, 69.04) | 11.87 (-47.10, 66.09)  | -15.97 (-43.58, 33.50)  | -0.82 (-55.23, 55.85)  | 23.31 (-65.25, 110.65) | 10.33 (-41.22, 62.31)  | 7.19 (-58.25, 71.97)   | -3.81 (-75.79, 67.65)   |
| Dryopithec             | 4.57 (-45.18, 55.58)  | 3.16 (-47.74, 51.14)   | -24.65 (-67.34, 21.10)  | -9.32 (-59.09, 41.92)  | 13.83 (-59.86, 87.61)  | 1.41 (-419.1, 47.89)   | -2.21 (-60.63, 60.18)  | -12.99 (-81.42, 56.31)  |
| -4.57 (-55.58, 45.18)  | Dryopithec            | -1.50 (-38.92, 30.74)  | -29.07 (-54.48, -3.98)  | -13.87 (-50.56, 23.48) | 9.81 (-67.43, 85.69)   | -3.31 (-33.43, 28.03)  | -6.61 (-55.50, 43.81)  | -16.90 (-73.88, 40.25)  |
| -3.16 (-51.14, 47.74)  | 1.50 (-30.74, 38.92)  | Use                    | -27.74 (-53.44, 3.04)   | -12.15 (-48.57, 28.98) | 11.28 (-63.83, 87.14)  | -1.95 (-31.42, 34.44)  | -4.86 (-52.98, 48.09)  | -15.47 (-72.58, 45.54)  |
| 24.55 (-21.10, 67.34)  | 29.07 (3.58, 54.48)   | 27.74 (-3.04, 53.44)   | Phebus                  | 15.25 (-12.19, 43.58)  | 39.02 (-34.93, 109.89) | 25.83 (7.50, 45.48)    | 22.69 (-20.03, 66.50)  | 11.96 (-39.02, 63.84)   |
| 9.32 (-41.92, 59.09)   | 13.87 (-23.48, 50.56) | 12.15 (-28.98, 48.57)  | -15.25 (-43.58, 12.19)  | Phebus                 | 23.97 (-53.41, 99.41)  | 10.59 (-16.93, 39.27)  | 7.80 (-43.32, 57.67)   | -2.98 (-62.39, 54.98)   |
| -13.83 (-87.01, 59.86) | -9.81 (-85.69, 67.43) | -11.28 (-87.14, 63.83) | -39.02 (-109.89, 34.93) | -23.97 (-98.44, 53.41) | Queen                  | -13.34 (-83.61, 62.27) | -15.69 (-98.68, 67.09) | -26.73 (-114.36, 63.88) |
| -1.41 (-47.89, 41.91)  | 3.31 (-29.03, 334.3)  | 1.95 (-34.44, 31.42)   | -25.83 (-45.48, -7.93)  | -10.59 (-39.27, 18.93) | 13.34 (-42.27, 63.61)  | Thomomys               | -3.21 (-46.73, 40.25)  | -14.20 (-69.92, 40.97)  |
| 2.31 (-60.18, 60.83)   | 6.61 (-43.81, 55.50)  | 4.86 (-49.09, 52.98)   | -22.69 (-66.50, 20.03)  | -7.80 (-57.67, 43.32)  | 13.69 (-67.09, 96.68)  | 3.21 (-40.25, 46.73)   | Thomomys               | -10.67 (-78.70, 56.04)  |
| 12.99 (-59.31, 81.42)  | 16.80 (-40.25, 73.88) | 15.47 (-46.54, 72.59)  | -11.96 (-63.84, 39.02)  | 2.88 (-54.98, 62.39)   | 26.73 (-83.38, 114.36) | 14.20 (-40.97, 69.92)  | 10.67 (-56.04, 78.70)  | Zinc                    |

## Rank probability

Rank 1 is best, rank N is worst.

| Drug                    | Rank 1 | Rank 2 | Rank 3 | Rank 4 | Rank 5 | Rank 6 | Rank 7 | Rank 8 | Rank 9 | Rank 10 | Rank 11 | Rank 12 | Rank 13 | Rank 14 | Rank 15 | Rank 16 | Rank 17 | Rank 18 | Rank 19 |
|-------------------------|--------|--------|--------|--------|--------|--------|--------|--------|--------|---------|---------|---------|---------|---------|---------|---------|---------|---------|---------|
| Alicin                  | 0.05   | 0.06   | 0.05   | 0.05   | 0.04   | 0.04   | 0.04   | 0.04   | 0.04   | 0.05    | 0.04    | 0.05    | 0.06    | 0.06    | 0.06    | 0.06    | 0.07    | 0.09    | 0.07    |
| Aloe                    | 0      | 0.01   | 0.02   | 0.03   | 0.03   | 0.04   | 0.05   | 0.06   | 0.07   | 0.08    | 0.09    | 0.09    | 0.1     | 0.1     | 0.09    | 0.07    | 0.04    | 0.03    | 0.01    |
| Amlexanox               | 0.03   | 0.08   | 0.13   | 0.14   | 0.13   | 0.12   | 0.1    | 0.08   | 0.06   | 0.04    | 0.03    | 0.02    | 0.01    | 0.01    | 0       | 0       | 0       | 0       | 0       |
| Benzylamine             | 0.02   | 0.09   | 0.08   | 0.06   | 0.05   | 0.05   | 0.05   | 0.05   | 0.05   | 0.05    | 0.05    | 0.05    | 0.05    | 0.06    | 0.05    | 0.05    | 0.05    | 0.05    | 0.03    |
| Berberine gelatin       | 0.04   | 0.05   | 0.04   | 0.05   | 0.04   | 0.04   | 0.04   | 0.04   | 0.04   | 0.05    | 0.05    | 0.06    | 0.06    | 0.07    | 0.06    | 0.06    | 0.07    | 0.09    | 0.07    |
| Chitosan                | 0.24   | 0.1    | 0.06   | 0.05   | 0.04   | 0.03   | 0.03   | 0.03   | 0.03   | 0.03    | 0.03    | 0.03    | 0.04    | 0.03    | 0.04    | 0.04    | 0.04    | 0.06    | 0.07    |
| Cryotherapy             | 0      | 0.01   | 0.01   | 0.01   | 0.01   | 0.01   | 0.01   | 0.01   | 0.01   | 0.02    | 0.02    | 0.03    | 0.03    | 0.04    | 0.05    | 0.06    | 0.08    | 0.16    | 0.43    |
| Curcumin                | 0.02   | 0.04   | 0.06   | 0.07   | 0.08   | 0.08   | 0.08   | 0.08   | 0.09   | 0.08    | 0.08    | 0.07    | 0.06    | 0.05    | 0.03    | 0.02    | 0.01    | 0.01    | 0       |
| Dexamethasone           | 0.12   | 0.14   | 0.11   | 0.09   | 0.08   | 0.07   | 0.06   | 0.06   | 0.05   | 0.04    | 0.04    | 0.04    | 0.03    | 0.03    | 0.02    | 0.02    | 0.01    | 0.01    | 0       |
| Diosmectite             | 0.04   | 0.05   | 0.04   | 0.04   | 0.04   | 0.04   | 0.04   | 0.04   | 0.05   | 0.05    | 0.05    | 0.06    | 0.05    | 0.06    | 0.07    | 0.06    | 0.07    | 0.09    | 0.07    |
| Doxycycline             | 0.04   | 0.06   | 0.07   | 0.06   | 0.06   | 0.06   | 0.05   | 0.05   | 0.06   | 0.06    | 0.06    | 0.06    | 0.06    | 0.06    | 0.05    | 0.05    | 0.04    | 0.04    | 0.02    |
| Glycyrrhiza             | 0.02   | 0.05   | 0.07   | 0.08   | 0.09   | 0.09   | 0.09   | 0.09   | 0.08   | 0.08    | 0.07    | 0.06    | 0.05    | 0.03    | 0.03    | 0.01    | 0.01    | 0       | 0       |
| Laser                   | 0.02   | 0.05   | 0.06   | 0.08   | 0.08   | 0.08   | 0.08   | 0.08   | 0.08   | 0.07    | 0.07    | 0.06    | 0.06    | 0.04    | 0.03    | 0.02    | 0.01    | 0.01    | 0       |
| Placebo                 | 0      | 0      | 0      | 0      | 0      | 0      | 0      | 0      | 0      | 0       | 0       | 0.01    | 0.04    | 0.08    | 0.17    | 0.25    | 0.26    | 0.15    | 0.03    |
| Probiotics              | 0      | 0.01   | 0.01   | 0.02   | 0.03   | 0.03   | 0.04   | 0.05   | 0.06   | 0.07    | 0.09    | 0.1     | 0.1     | 0.11    | 0.09    | 0.08    | 0.06    | 0.03    | 0.01    |
| Quercetin               | 0.27   | 0.12   | 0.07   | 0.05   | 0.04   | 0.04   | 0.03   | 0.03   | 0.03   | 0.03    | 0.03    | 0.03    | 0.03    | 0.03    | 0.03    | 0.03    | 0.03    | 0.04    | 0.04    |
| Triamcinolone           | 0      | 0.01   | 0.02   | 0.04   | 0.07   | 0.1    | 0.11   | 0.13   | 0.13   | 0.13    | 0.1     | 0.08    | 0.05    | 0.03    | 0.01    | 0       | 0       | 0       | 0       |
| Thiester Glycerol Oxide | 0.05   | 0.06   | 0.06   | 0.05   | 0.06   | 0.05   | 0.05   | 0.05   | 0.05   | 0.06    | 0.06    | 0.06    | 0.06    | 0.06    | 0.05    | 0.05    | 0.05    | 0.05    | 0.03    |
| Zinc                    | 0.04   | 0.04   | 0.04   | 0.03   | 0.03   | 0.03   | 0.03   | 0.03   | 0.03   | 0.04    | 0.04    | 0.05    | 0.05    | 0.07    | 0.07    | 0.06    | 0.08    | 0.11    | 0.11    |

### Consistency check

| Parameter                         | Median (95% CI)      |
|-----------------------------------|----------------------|
| Random Effects Standard Deviation | 23.49 (16.60, 34.97) |

### Convergence Diagnostics

Convergence is assessed using the Brooks-Gelman-Rubin method. This method compares within-chain and between-chain variance to calculate the Potential Scale Reduction Factor (PSRF). A PSRF close to one indicates approximate convergence has been reached.

| Parameter                       | PSRF |
|---------------------------------|------|
| d.Benzydamine.Doxycycline       | 1.01 |
| d.Benzydamine.Placebo           | 1.06 |
| d.Benzydamine.Quercetin         | 1.01 |
| d.Benzydamine.Triamcinolone     | 1.08 |
| d.Placebo.Allicin               | 1.00 |
| d.Placebo.Aloe                  | 1.01 |
| d.Placebo.Amlexanox             | 1.01 |
| d.Placebo.Berberinegelatin      | 1.01 |
| d.Placebo.Chitosan              | 1.00 |
| d.Placebo.Cryotherapy           | 1.10 |
| d.Placebo.Curcumin              | 1.02 |
| d.Placebo.Dexamethasone         | 1.04 |
| d.Placebo.Diosmectite           | 1.00 |
| d.Placebo.Glycyrrhiza           | 1.01 |
| d.Placebo.Laser                 | 1.33 |
| d.Placebo.Probiotics            | 1.01 |
| d.Placebo.TriesterGlycerolOxide | 1.00 |
| d.Placebo.Zinc                  | 1.14 |
| sd.d                            | 1.24 |

Number of chains : 4  
Tuning iterations : 20,000  
Simulation iterations : 50,000  
Thinning interval : 10  
Inference samples : 10,000  
Variance scaling factor : 2.5

2.Inconsistency Model

Summary estimates for Size-reducing effect

The estimate values for size-reducing effect are given as mean difference (MD) and 95% confidence interval (CI). The table shows the pooled estimates based on the network meta-analysis during the treatment period for each study.

|                         |                        |                       |                         |                         |                        |                         |                        |                        |                         |
|-------------------------|------------------------|-----------------------|-------------------------|-------------------------|------------------------|-------------------------|------------------------|------------------------|-------------------------|
| Alison                  | -0.72 (-53.32, 52.17)  | 1397 (-38.57, 67.58)  | -4.00 (-82.92, 68.12)   | -1.49 (-66.21, 64.92)   | 1339 (-79.57, 102.29)  | -16.49 (-86.54, 53.17)  | 10.11 (-46.69, 65.05)  | 21.81 (-45.81, 85.28)  | -2.17 (-66.45, 63.22)   |
| 072 (-52.17, 53.32)     | Alison                 | 1475 (-19.56, 49.47)  | -2.22 (-68.76, 56.12)   | -0.62 (-51.40, 49.27)   | 1517 (-62.27, 92.42)   | -15.41 (-72.96, 40.13)  | 10.90 (-25.62, 46.30)  | 22.32 (-30.67, 73.20)  | -0.97 (-51.94, 50.41)   |
| -1397 (-67.58, 38.57)   | -14.75 (-49.47, 19.96) | Amoxicillin           | -16.29 (-41.75, 65.45)  | -15.53 (-67.01, 34.12)  | 0.20 (-79.63, 76.88)   | -30.45 (-89.12, 25.55)  | -4.27 (-40.04, 32.93)  | 8.57 (-39.60, 50.89)   | -15.77 (-67.22, 35.56)  |
| 4007 (-68.12, 82.92)    | 2.22 (-56.12, 68.76)   | 16.29 (-41.75, 65.45) | benzoylpenicillin       | 1.53 (-68.55, 79.55)    | 18.53 (-75.86, 114.12) | -12.86 (-90.59, 68.23)  | 13.25 (-42.68, 76.36)  | 25.60 (-37.75, 89.40)  | 2.32 (-70.73, 78.55)    |
| 1497 (-64.92, 66.21)    | 0.62 (-49.27, 51.40)   | 15.33 (-34.12, 67.01) | -1.53 (-79.55, 68.59)   | benzene propan          | 15.70 (-72.21, 103.11) | -15.09 (-83.95, 52.93)  | 11.09 (-42.90, 64.83)  | 22.75 (-41.26, 84.48)  | -0.63 (-61.79, 63.22)   |
| -13399 (-102.29, 79.57) | -15.17 (-92.42, 62.27) | -0.20 (-76.88, 79.63) | -18.53 (-114.12, 75.86) | -15.70 (-103.11, 72.21) | Cefixime               | -30.59 (-123.11, 60.34) | -4.21 (-84.42, 76.10)  | 7.25 (-79.95, 94.01)   | -15.89 (-101.03, 69.84) |
| 1649 (-53.17, 96.54)    | 15.41 (-40.51, 72.96)  | 30.45 (-25.55, 89.12) | 12.86 (-89.23, 90.59)   | 15.09 (-52.93, 83.85)   | 30.59 (-60.34, 123.11) | Cephalexin              | 26.62 (-32.47, 84.89)  | 38.05 (-32.19, 108.23) | 14.73 (-52.32, 83.80)   |
| -1011 (-65.05, 46.69)   | -10.90 (-46.30, 25.82) | 4.27 (-32.98, 40.04)  | -13.25 (-76.36, 42.88)  | -11.09 (-64.83, 42.90)  | 4.21 (-76.10, 84.42)   | -26.62 (-84.89, 32.47)  | Cefuroxime             | 12.32 (-43.12, 62.14)  | -11.91 (-68.25, 43.24)  |
| -2181 (-85.28, 45.81)   | -22.32 (-73.20, 30.67) | -8.57 (-50.89, 39.60) | -25.60 (-89.40, 37.75)  | -22.75 (-84.49, 41.25)  | -7.25 (-94.01, 79.59)  | -38.05 (-108.23, 32.19) | -12.32 (-62.14, 43.12) | Dexamethasone          | -23.49 (-86.16, 42.48)  |
| 217 (-63.22, 66.45)     | 0.97 (-50.41, 51.94)   | 15.77 (-35.56, 67.22) | -2.32 (-79.55, 70.79)   | 0.63 (-63.22, 61.79)    | 15.59 (-69.84, 101.03) | -14.73 (-83.80, 52.32)  | 11.91 (-43.24, 66.25)  | 22.49 (-42.46, 86.16)  | Doxemetic               |
| -7.99 (-70.14, 58.01)   | -8.23 (-56.81, 41.96)  | 6.34 (-41.55, 55.62)  | -10.62 (-71.71, 43.48)  | -8.98 (-71.77, 54.58)   | 6.85 (-79.70, 93.21)   | -24.20 (-92.15, 44.32)  | 2.50 (-44.16, 49.12)   | 14.47 (-49.72, 75.85)  | -9.08 (-71.17, 54.84)   |
| -3.50 (-61.45, 53.89)   | -4.99 (-44.59, 38.94)  | 10.27 (-23.42, 44.26) | -6.84 (-80.34, 58.73)   | -5.07 (-60.41, 51.41)   | 11.13 (-71.06, 90.56)  | -20.69 (-81.19, 41.15)  | 5.64 (-36.57, 55.18)   | 18.05 (-34.86, 71.08)  | -5.35 (-60.46, 52.08)   |
| -1887 (-73.86, 37.19)   | -19.41 (-56.96, 18.51) | -4.54 (-37.60, 27.47) | -21.43 (-92.77, 39.62)  | -20.12 (-73.05, 32.44)  | -4.36 (-84.73, 73.89)  | -35.70 (-93.94, 23.44)  | -9.19 (-47.36, 31.63)  | 3.65 (-51.16, 54.13)   | -20.15 (-79.98, 32.27)  |
| 1740 (-29.12, 63.69)    | 16.73 (-8.12, 41.34)   | 35.58 (-4.93, 55.89)  | 12.66 (-55.83, 73.99)   | 16.03 (-28.51, 59.88)   | 31.75 (-42.37, 105.33) | 0.99 (-51.00, 52.44)    | 18.86 (-16.14, 50.56)  | 37.20 (-4.07, 79.30)   | 15.75 (-28.80, 60.26)   |
| 115 (-54.11, 57.76)     | 0.28 (-38.28, 38.39)   | 15.54 (-24.09, 52.81) | -1.98 (-68.18, 56.45)   | -0.39 (-54.70, 55.28)   | 15.25 (-65.14, 95.36)  | -15.40 (-76.57, 44.71)  | 11.12 (-25.07, 46.82)  | 29.07 (-33.56, 77.06)  | -0.50 (-55.21, 54.20)   |
| -1118 (-97.67, 80.96)   | -11.98 (-49.29, 66.31) | 2.71 (-75.08, 83.81)  | -15.44 (-62.03, 30.84)  | -12.90 (-97.73, 74.35)  | 2.93 (-103.10, 109.37) | -27.28 (-119.68, 63.81) | -1.57 (-76.30, 75.72)  | 11.36 (-49.59, 88.80)  | -13.18 (-100.52, 76.15) |
| -7.28 (-59.14, 45.30)   | -8.08 (-36.67, 22.32)  | 7.08 (-27.76, 36.15)  | -10.30 (-63.71, 40.01)  | -8.57 (-57.37, 41.16)   | 7.04 (-69.55, 84.39)   | -23.56 (-79.30, 31.64)  | 2.99 (-20.73, 23.98)   | 15.06 (-36.04, 61.44)  | -8.87 (-58.77, 41.32)   |
| -7.07 (-69.48, 67.11)   | -8.01 (-56.13, 41.71)  | 7.12 (-41.70, 55.88)  | -10.38 (-60.76, 53.48)  | -8.44 (-70.35, 54.89)   | 7.04 (-79.11, 92.55)   | -23.28 (-91.76, 44.16)  | 2.96 (-43.34, 49.10)   | 15.00 (-47.54, 75.89)  | -8.61 (-57.15, 53.97)   |
| 896 (-52.01, 72.96)     | 7.83 (-43.63, 57.80)   | 22.42 (-28.82, 74.99) | 4.31 (-66.98, 72.83)    | 7.27 (-56.29, 70.06)    | 23.10 (-62.63, 109.07) | -7.44 (-77.90, 60.34)   | 18.19 (-34.76, 72.21)  | 29.78 (-31.88, 91.42)  | 6.51 (-56.24, 70.80)    |

|                        |                        |                       |                         |                        |                         |                        |                        |                         |
|------------------------|------------------------|-----------------------|-------------------------|------------------------|-------------------------|------------------------|------------------------|-------------------------|
| 7.59 (-80.1, 70.14)    | 3.50 (-53.69, 61.45)   | 18.87 (-37.13, 73.86) | -17.40 (-36.63, 29.12)  | -1.15 (-57.76, 54.11)  | 11.18 (-30.56, 97.67)   | 7.32 (-45.30, 59.14)   | 7.07 (-57.71, 69.48)   | -8.96 (-72.96, 55.01)   |
| 8.23 (-41.96, 56.81)   | 4.99 (-38.94, 44.99)   | 19.41 (-18.51, 56.96) | -16.73 (-41.34, 8.12)   | -0.28 (-38.39, 38.28)  | 11.98 (-66.31, 89.29)   | 8.08 (-22.32, 38.67)   | 8.01 (-41.71, 56.13)   | -7.83 (-57.80, 43.63)   |
| -6.34 (-55.62, 41.95)  | -10.27 (-44.26, 23.42) | 4.54 (-27.47, 37.00)  | -35.39 (-56.89, -14.89) | -15.54 (-52.81, 24.09) | -2.71 (-63.81, 75.09)   | -7.08 (-36.15, 22.76)  | -7.12 (-56.88, 41.70)  | -22.42 (-74.99, 29.82)  |
| 10.62 (-43.48, 71.71)  | 6.84 (-58.73, 80.34)   | 21.43 (-39.82, 92.77) | -12.66 (-75.59, 55.83)  | 1.98 (-56.45, 68.18)   | 15.44 (-30.84, 62.23)   | 10.30 (-40.01, 68.71)  | 10.39 (-53.48, 80.76)  | -4.31 (-72.63, 56.98)   |
| 8.98 (-54.54, 71.77)   | 5.07 (-51.41, 60.41)   | 20.12 (-32.44, 73.05) | -16.03 (-59.58, 28.51)  | 0.99 (-55.28, 54.70)   | 12.90 (-74.35, 97.73)   | 8.57 (-41.16, 57.37)   | 8.44 (-54.89, 70.35)   | -7.27 (-70.06, 55.29)   |
| -6.85 (-93.21, 79.70)  | -11.13 (-90.95, 71.06) | 4.36 (-73.98, 84.73)  | -31.75 (-105.53, 42.37) | -15.25 (-95.36, 55.14) | -2.93 (-109.37, 103.10) | -7.04 (-84.39, 69.55)  | -7.04 (-92.55, 79.11)  | -23.10 (-109.07, 62.83) |
| 24.20 (-44.32, 92.15)  | 20.09 (-41.15, 81.19)  | 36.70 (-23.44, 90.94) | -0.99 (-52.44, 51.00)   | 15.40 (-44.71, 76.57)  | 27.28 (-63.21, 119.69)  | 22.58 (-31.64, 79.80)  | 23.28 (-44.16, 91.76)  | 7.44 (-60.34, 77.80)    |
| -2.50 (-49.12, 44.16)  | -5.64 (-55.18, 36.57)  | 9.19 (-31.63, 47.36)  | -18.86 (-59.56, 18.14)  | -11.12 (-46.82, 25.07) | 1.37 (-75.75, 76.30)    | -2.99 (-25.98, 20.73)  | -2.96 (-48.10, 43.34)  | -18.19 (-72.21, 34.76)  |
| -14.47 (-75.95, 49.72) | -18.05 (-71.08, 34.98) | -3.85 (-54.13, 51.16) | -37.20 (-78.38, 4.07)   | -23.07 (-77.06, 33.96) | -11.36 (-88.80, 69.59)  | -15.06 (-61.44, 36.04) | -15.00 (-75.59, 47.54) | -29.78 (-91.42, 31.86)  |
| 9.09 (-54.84, 71.17)   | 5.53 (-52.08, 60.46)   | 20.15 (-32.27, 73.98) | -15.75 (-60.26, 28.80)  | 0.50 (-54.20, 55.21)   | 13.16 (-76.15, 100.32)  | 8.67 (-41.32, 58.77)   | 8.61 (-53.57, 71.15)   | -65.1 (-70.80, 56.54)   |
| Droopychne             | -3.84 (-60.83, 51.16)  | 11.26 (-40.84, 62.13) | -23.54 (-76.44, 27.93)  | -8.94 (-56.63, 40.59)  | 3.53 (-72.08, 78.69)    | -0.38 (-40.07, 39.80)  | -0.26 (-55.73, 53.23)  | -16.20 (-77.95, 47.11)  |
| 3.84 (-51.16, 60.83)   | Chyrtchne              | 14.79 (-22.09, 52.53) | -32.90 (-56.66, -8.77)  | -5.96 (-48.55, 44.75)  | 7.62 (-77.50, 88.96)    | 2.68 (-33.79, 46.23)   | 2.91 (-51.19, 59.04)   | -12.17 (-69.11, 44.90)  |
| -11.76 (-62.13, 40.84) | -14.79 (-52.53, 22.09) | Line1                 | -28.03 (-55.09, 1.06)   | -20.20 (-59.67, 22.52) | -7.33 (-30.43, 73.07)   | -13.67 (-48.48, 20.01) | -12.21 (-41.68, 39.20) | -27.31 (-80.58, 26.99)  |
| 23.54 (-27.93, 76.44)  | 32.90 (67.7, 55.66)    | 28.03 (-1.66, 55.09)  | Duckto                  | 13.37 (-44.1, 38.67)   | 28.82 (-48.71, 103.16)  | 22.58 (-13.00, 61.29)  | 22.62 (-27.95, 74.79)  | 8.92 (-35.87, 52.90)    |
| 8.94 (-40.59, 56.69)   | 5.96 (-44.75, 48.55)   | 20.20 (-22.52, 59.67) | -13.37 (-39.67, 14.41)  | Picktocks              | 12.76 (-65.88, 88.53)   | 8.20 (-20.54, 37.16)   | 7.88 (-40.76, 56.42)   | -7.20 (-61.90, 46.09)   |
| -3.53 (-78.69, 72.08)  | -7.62 (-88.96, 77.50)  | 7.33 (-73.07, 90.43)  | -28.82 (-103.16, 48.71) | -12.76 (-88.53, 65.58) | Queen                   | -4.19 (-76.07, 69.39)  | -4.33 (-84.26, 76.74)  | -19.23 (-105.10, 65.19) |
| 0.38 (-39.80, 40.07)   | -2.58 (-46.23, 33.79)  | 13.67 (-30.01, 48.48) | -22.58 (-61.23, 13.00)  | -8.20 (-37.18, 20.54)  | 4.19 (-69.39, 76.07)    | Thunrochone            | -0.11 (-40.90, 41.00)  | -15.55 (-65.31, 33.96)  |
| 0.26 (-59.23, 59.73)   | -2.91 (-59.04, 51.19)  | 12.21 (-39.20, 61.63) | -22.62 (-74.79, 27.95)  | -7.88 (-38.42, 40.76)  | 4.33 (-78.74, 84.28)    | 0.11 (-41.00, 40.90)   | Teater Gyroed Cude     | -15.73 (-77.69, 47.32)  |
| 16.20 (-47.11, 77.95)  | 12.17 (-44.90, 69.11)  | 27.31 (-39.98, 90.58) | -8.92 (-52.90, 35.87)   | 7.20 (-46.09, 61.90)   | 19.23 (-65.19, 105.10)  | 15.55 (-33.96, 65.31)  | 15.73 (-47.32, 77.69)  | Zinc                    |

### Inconsistency Factors

| Cycle                                                  | Median (95% CI)       |
|--------------------------------------------------------|-----------------------|
| Aloe, Amlexanox, Placebo, Triamcinolone                | 2.20 (-18.83, 32.03)  |
| Aloe, Curcumin, Placebo, Triamcinolone                 | -5.03 (-48.66, 15.75) |
| Aloe, Amlexanox, Dexamethasone, Placebo, Triamcinolone | -0.77 (-35.63, 31.63) |
| Aloe, Amlexanox, Glycyrrhiza, Placebo, Triamcinolone   | 8.03 (-10.93, 48.21)  |
| Aloe, Amlexanox, Laser, Placebo, Triamcinolone         | -5.38 (-43.79, 16.27) |
| Aloe, Placebo, Probiotics, Triamcinolone               | -1.52 (-34.62, 23.45) |
| Aloe, Placebo, Triamcinolone                           | -0.68 (-36.74, 31.29) |
| Aloe, Placebo, Triamcinolone                           | -0.68 (-36.74, 31.29) |
| Aloe, Placebo, Triamcinolone                           | -0.68 (-36.74, 31.29) |
| Amlexanox, Laser, Triamcinolone                        | -0.81 (-37.48, 25.92) |

### Variance Calculation

| Parameter                         | Median (95% CI)      |
|-----------------------------------|----------------------|
| Random Effects Standard Deviation | 21.14 (14.27, 31.66) |
| Inconsistency Standard Deviation  | 12.81 (1.61, 45.29)  |

## Convergence Diagnostics

Convergence is assessed using the Brooks-Gelman-Rubin method. This method compares within-chain and between-chain variance to calculate the Potential Scale Reduction Factor (PSRF). A PSRF close to one indicates approximate convergence has been reached.

| Parameter                                            | PSRF |
|------------------------------------------------------|------|
| d.Allicin.Placebo                                    | 1.00 |
| d.Aloe.Triamcinolone                                 | 1.00 |
| d.Amlexanox.Dexamethasone                            | 1.53 |
| d.Amlexanox.Glycyrrhiza                              | 1.01 |
| d.Benzydamine.Doxycycline                            | 1.72 |
| d.Benzydamine.Quercetin                              | 1.00 |
| d.Glycyrrhiza.Laser                                  | 1.01 |
| d.Placebo.Aloe                                       | 1.00 |
| d.Placebo.Berberinegelatin                           | 1.00 |
| d.Placebo.Chitosan                                   | 1.00 |
| d.Placebo.Cryotherapy                                | 1.00 |
| d.Placebo.Diosmectite                                | 1.00 |
| d.Placebo.Zinc                                       | 103  |
| d.Triamcinolone.Amlexanox                            | 1.02 |
| d.Triamcinolone.Benzydamine                          | 1.80 |
| d.Triamcinolone.Curcumin                             | 1.00 |
| d.Triamcinolone.Probiotics                           | 1.00 |
| d.Triamcinolone.TriesterGlycerolOxide                | 1.00 |
| w.Aloe.Placebo.Amlexanox.Triamcinolone               | 1.01 |
| w.Aloe.Placebo.Curcumin.Triamcinolone                | 1.00 |
| w.Aloe.Placebo.Dexamethasone.Amlexanox.Triamcinolone | 1.06 |
| w.Aloe.Placebo.Glycyrrhiza.Amlexanox.Triamcinolone   | 1.00 |
| w.Aloe.Placebo.Laser.Amlexanox.Triamcinolone         | 1.01 |
| w.Aloe.Placebo.Prpbiotics.Triamcinolone              | 1.00 |
| w.Aloe.Placebo.Triamcinolone                         | 1.01 |
| w.Aloe.Placebo.Triamcinolone                         | 1.01 |
| w.Aloe.Placebo.Triamcinolone                         | 1.01 |
| w.Amlexanox.Laser.Triamcinolone                      | 1.03 |
| sd.d                                                 | 1.00 |
| sd.w                                                 | 1.01 |

Number of chains : 4  
 Tuning iterations : 20,000  
 Simulation iterations : 50,000  
 Thinning interval : 10  
 Inference samples : 10,000  
 Variance scaling factor : 2.5

### 3. Node-splitting analysis

#### Node-splitting analysis of inconsistency

Inconsistency between direct and indirect estimates was estimated in the Node-Splitting Model. When P values is above 0.05 in a comparison, there is evidence of statistical inconsistency.

| Name                       | Direct Effect           | Indirect Effect        | Overall                 | P-Value |
|----------------------------|-------------------------|------------------------|-------------------------|---------|
| Aloe, Triamcinolone        | 10.21 (-40.60, 60.46)   | 4.55 (-31.80, 43.91)   | 8.38 (-21.59, 40.18)    | 0.85    |
| Amlexanox, Dexamethasone   | 12.53 (-43.51, 79.80)   | -3.44 (-62.35, 53.60)  | 1.26 (-35.76, 38.69)    | 0.67    |
| Amlexanox, Glycyrrhiza     | -13.76 (-68.65, 39.83)  | -4.21 (-44.62, 35.59)  | -5.83 (-37.06, 23.74)   | 0.76    |
| Amlexanox, Laser           | 10.51 (-40.36, 60.36)   | -24.58 (-72.00, 13.79) | -7.47 (-41.98, 22.72)   | 0.26    |
| Amlexanox, Placebo         | -43.87 (-67.14, -20.94) | -19.63 (-51.37, 13.55) | -35.29 (-54.72, -15.53) | 0.2     |
| Amlexanox, Triamcinolone   | 8.63 (-39.59, 55.83)    | -18.98 (-47.01, 10.06) | -9.29 (-33.32, 16.84)   | 0.32    |
| Benzydamine, Placebo       | -20.20 (-76.55, 34.13)  | -24.22 (-78.47, 32.21) | -23.99 (-73.07, 26.19)  | 0.92    |
| Benzydamine, Triamcinolone | 5.34 (-63.88, 65.60)    | 2.60 (-81.48, 67.53)   | 2.15 (-47.05, 54.59)    | 0.85    |
| Curcumin, Placebo          | -2.16 (-49.56, 44.59)   | -36.72 (-69.53, -4.83) | -26.41 (-54.91, 1.26)   | 0.22    |
| Curcumin, Triamcinolone    | -8.02 (-35.04, 19.46)   | 27.96 (-25.49, 81.28)  | -0.59 (-24.70, 24.02)   | 0.23    |
| Dexamethasone, Placebo     | -32.35 (-87.66, 24.74)  | -37.62 (-94.74, 21.31) | -36.62 (-74.85, 1.39)   | 0.9     |
| Glycyrrhiza, Laser         | 22.88 (-23.37, 69.23)   | -18.36 (-55.30, 18.14) | -1.50 (-38.92, 30.74)   | 0.16    |
| Laser, Placebo             | -36.29 (-63.60, -7.19)  | -34.32 (-72.05, 3.79)  | -27.74 (-53.44, 3.04)   | 0.92    |
| Laser, Triamcinolone       | 6.70 (-52.76, 63.20)    | -9.90 (-43.36, 25.94)  | -1.95 (-31.42, 34.44)   | 0.69    |
| Placebo, Probiotics        | 10.48 (-24.65, 45.32)   | 18.10 (-37.81, 65.62)  | 15.25 (-12.19, 43.58)   | 0.81    |
| Placebo, Triamcinolone     | 30.78 (1.50, 61.86)     | 26.78 (-4.03, 57.58)   | 25.83 (7.91, 45.48)     | 0.84    |
| Probiotics, Triamcinolone  | 5.09 (-33.75, 44.69)    | 9.61 (-30.68, 49.79)   | 10.59 (-16.93, 39.27)   | 0.87    |

### 4. Network structure

#### Network structure of sensitivity analysis

37 RCTs involving 19 local interventions were included in the sensitivity analysis considering the size-reducing effect.

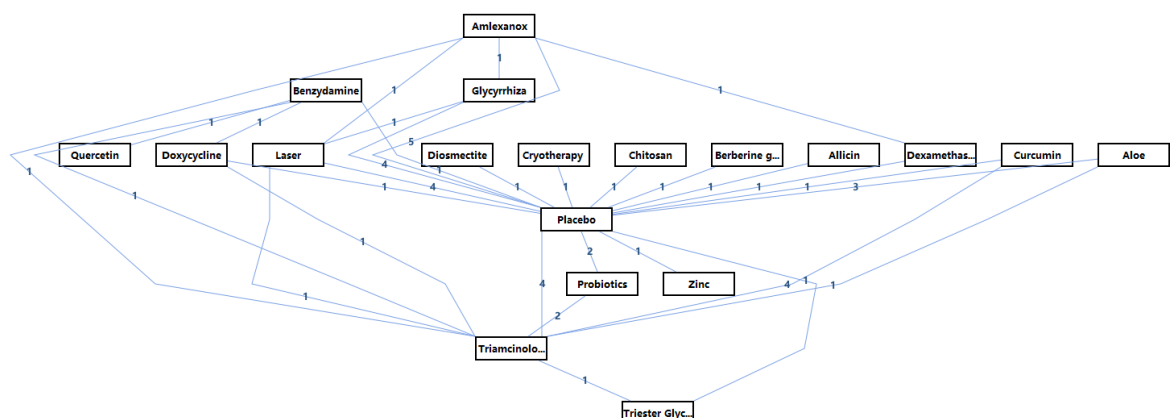



## 5. Pairwise meta-analysis

### Pairwise meta-analysis of size-reducing effect

Size-reducing effect were measured by mean difference (MD) and 95% confidence interval (CI).

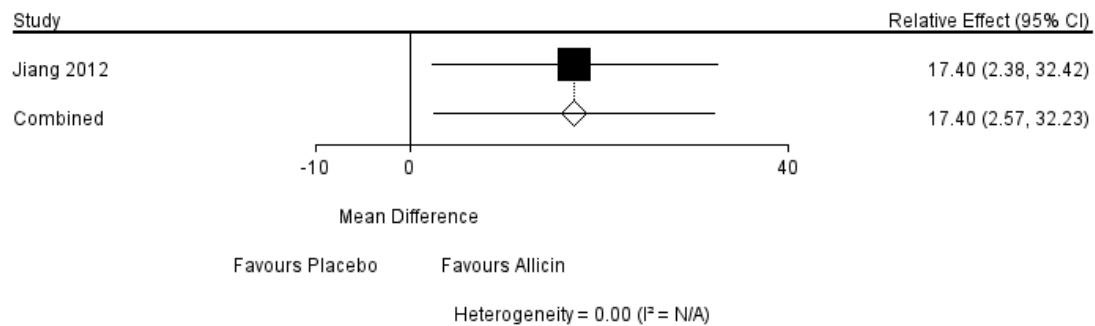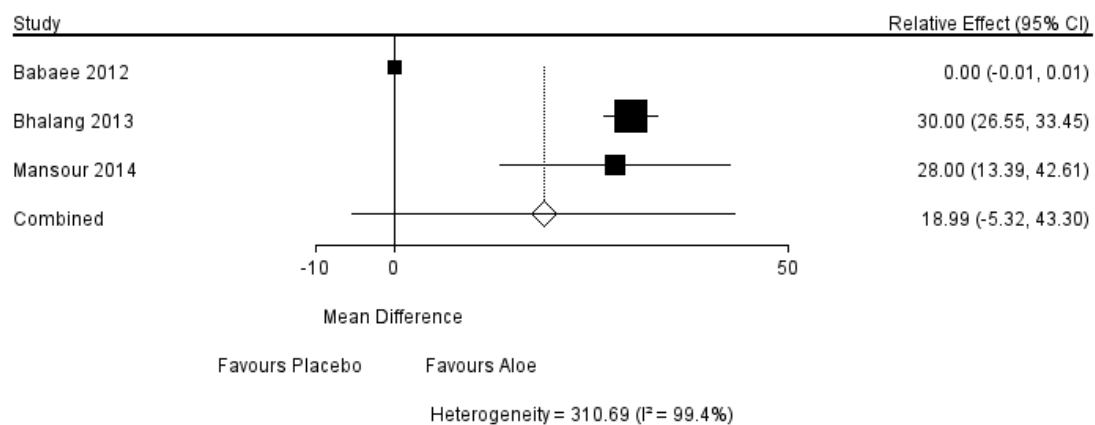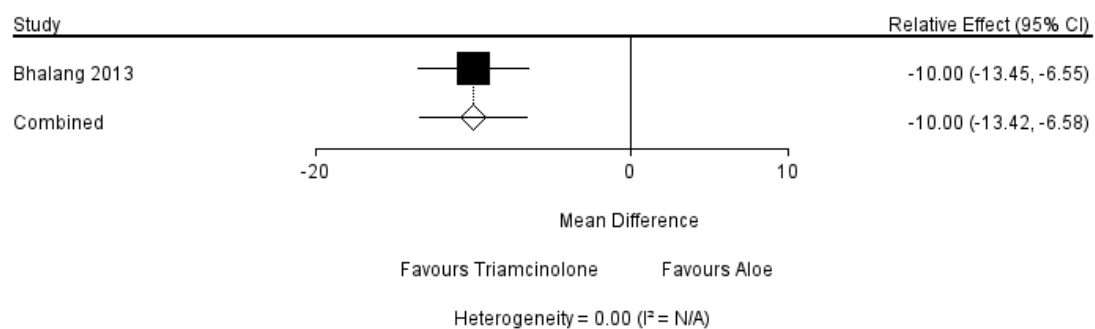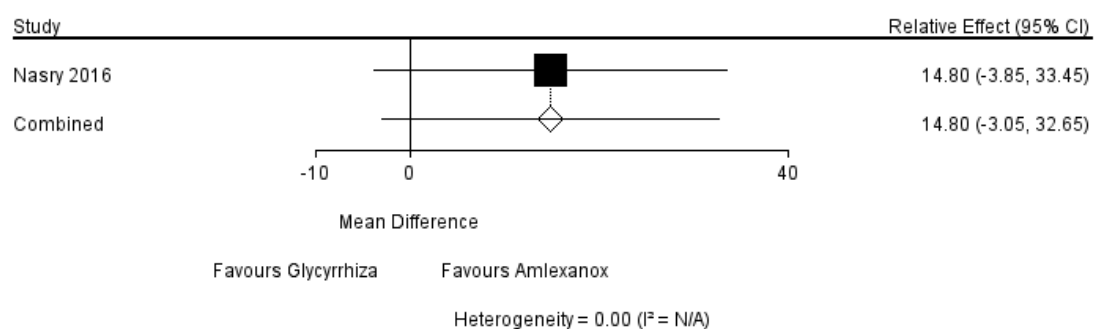

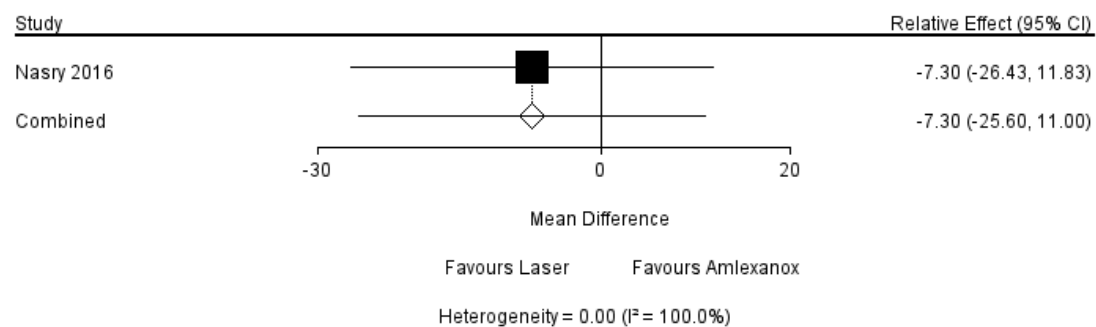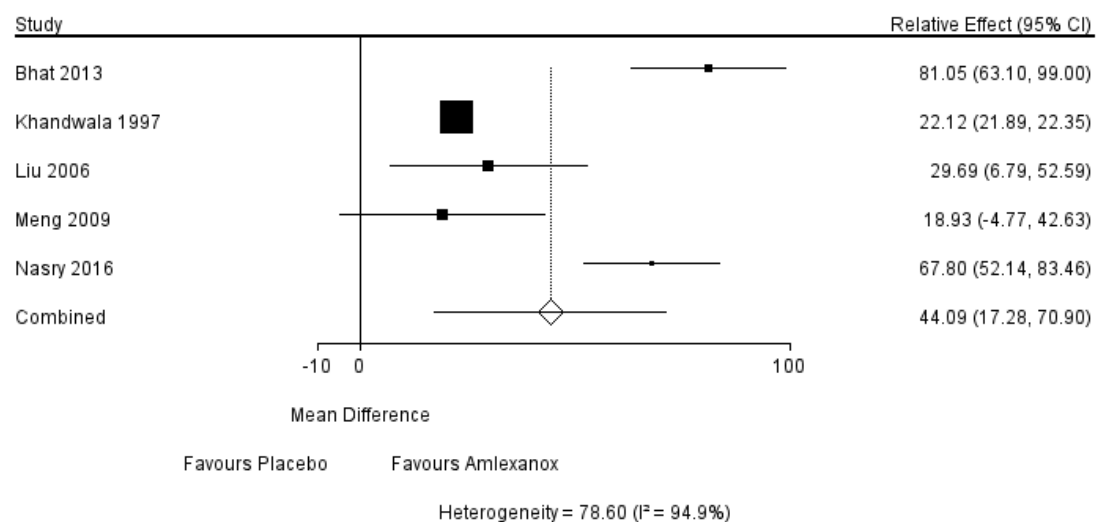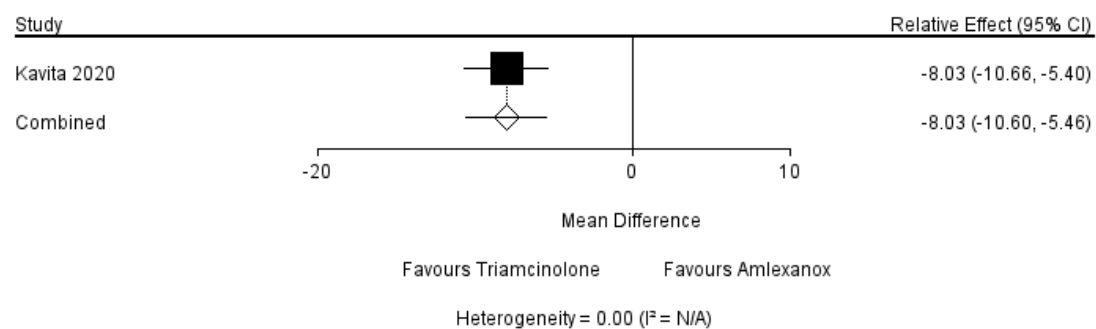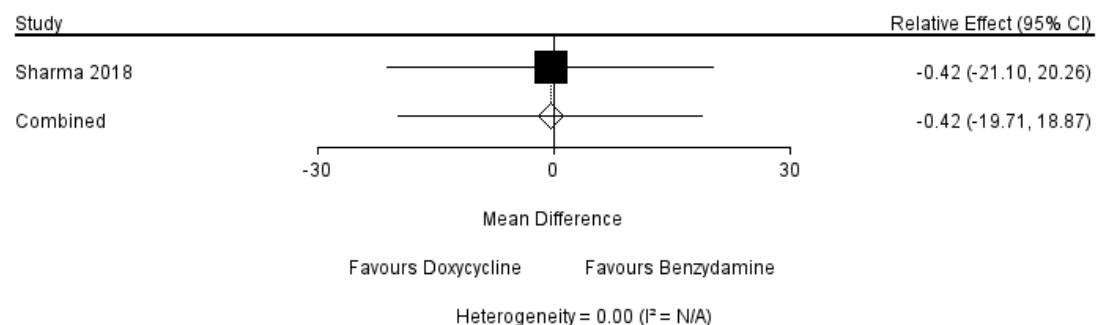

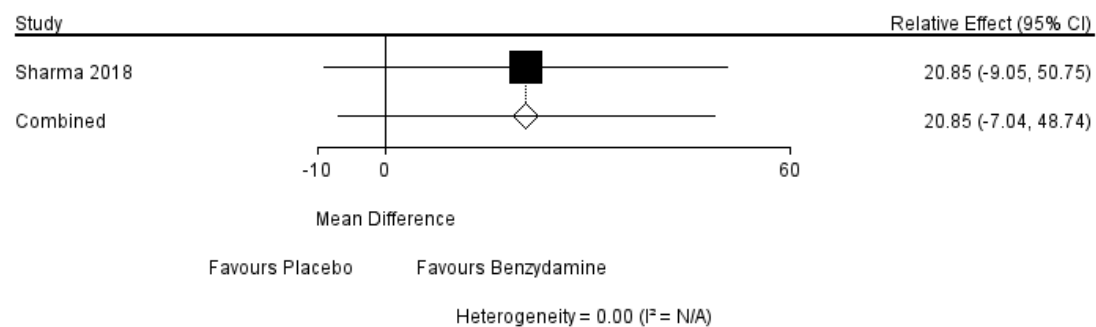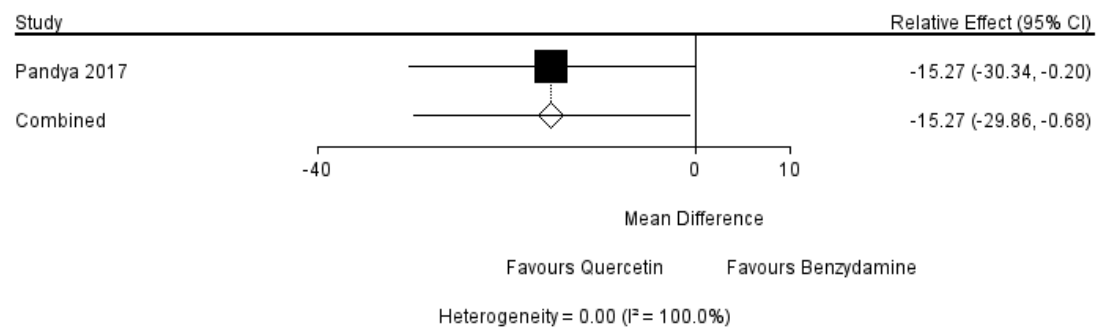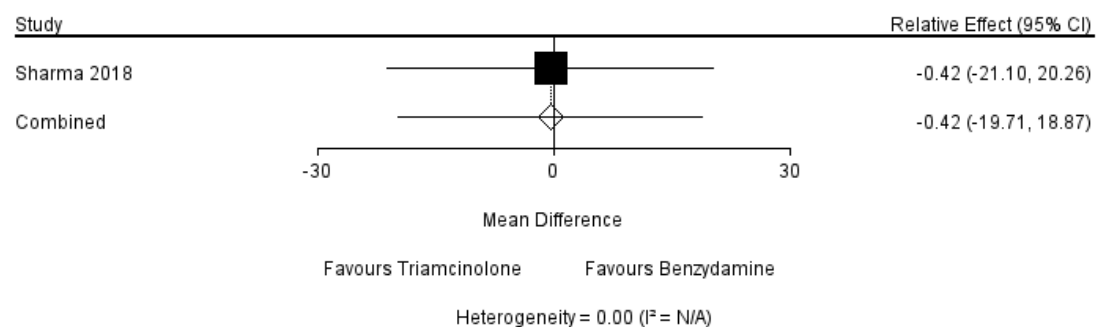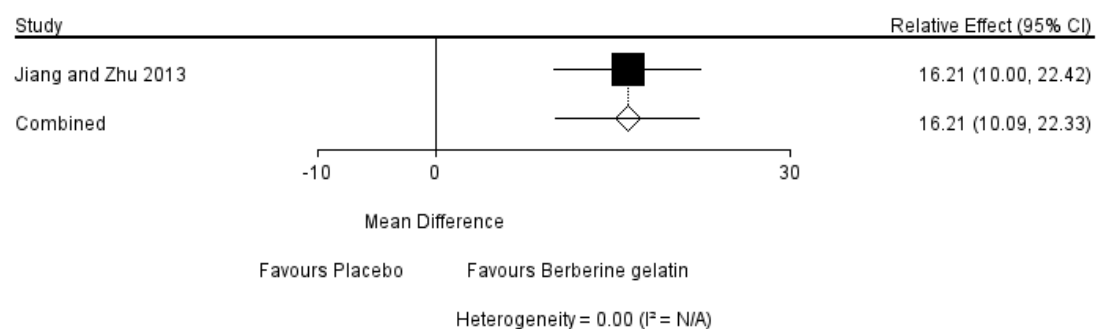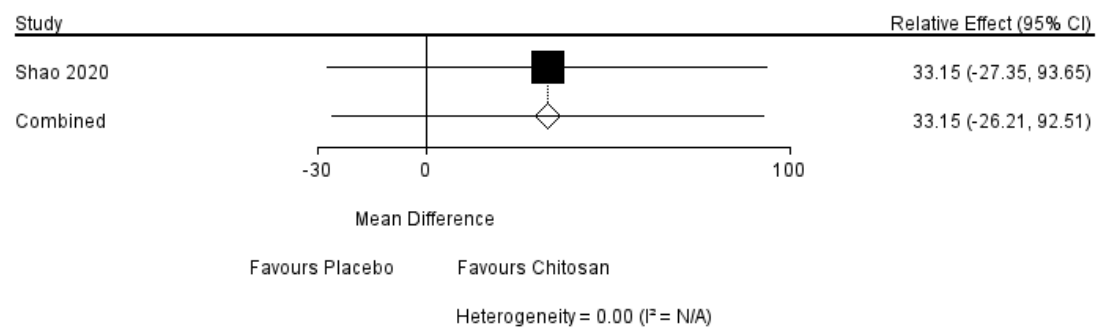

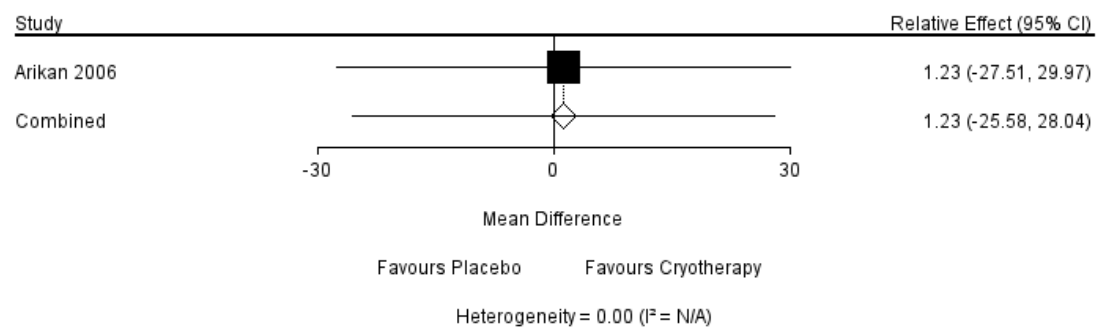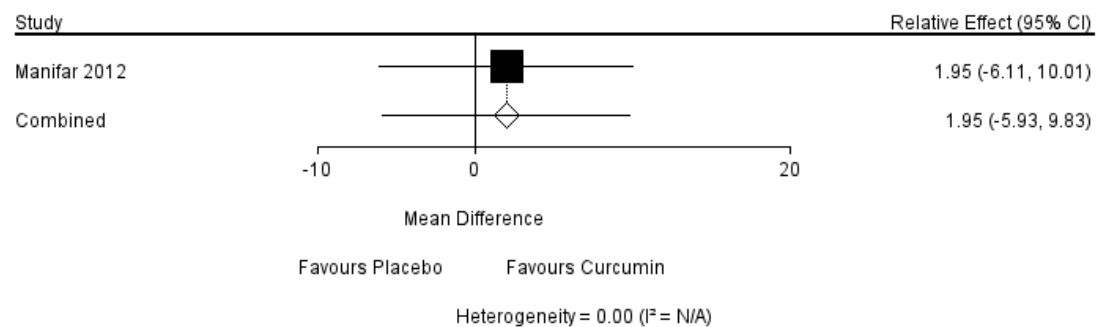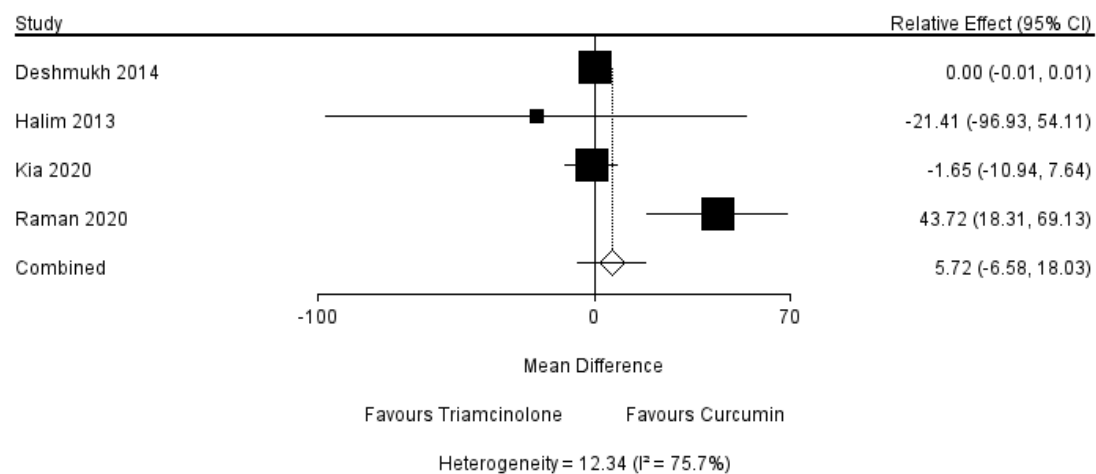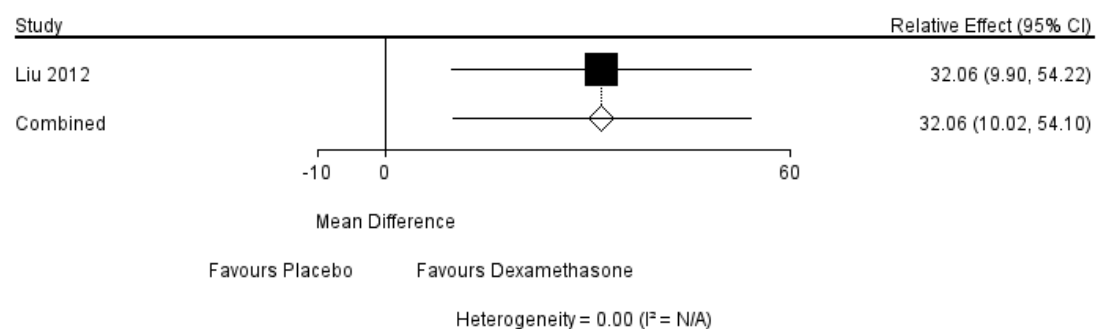

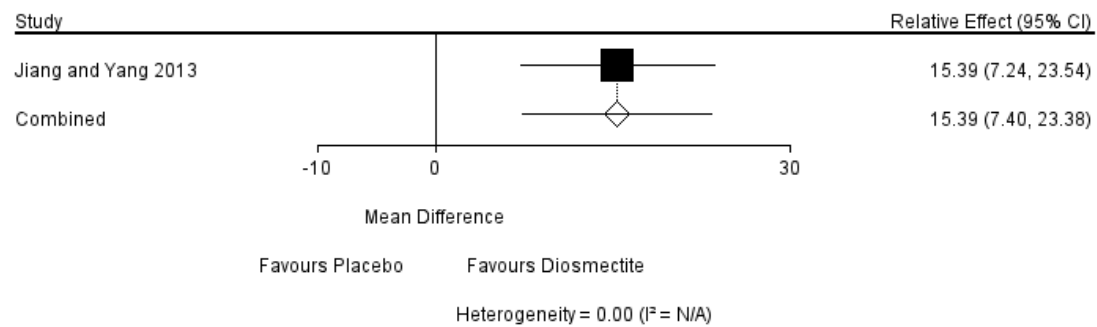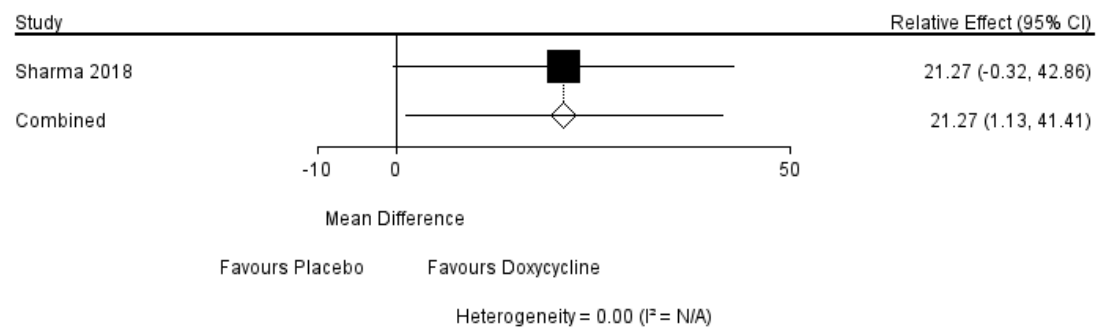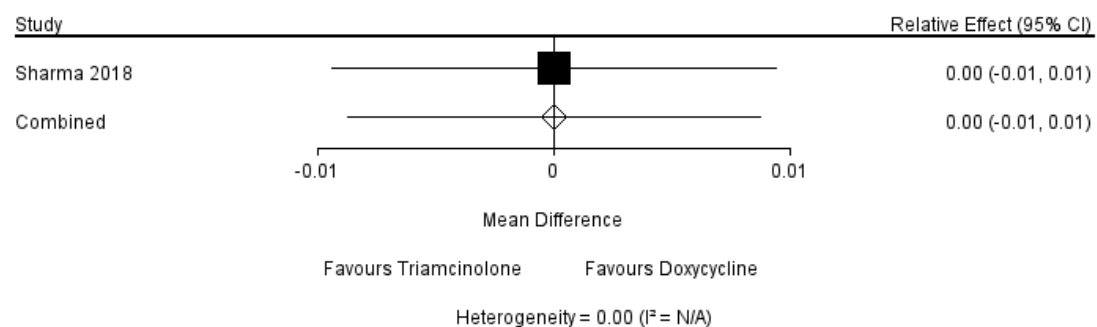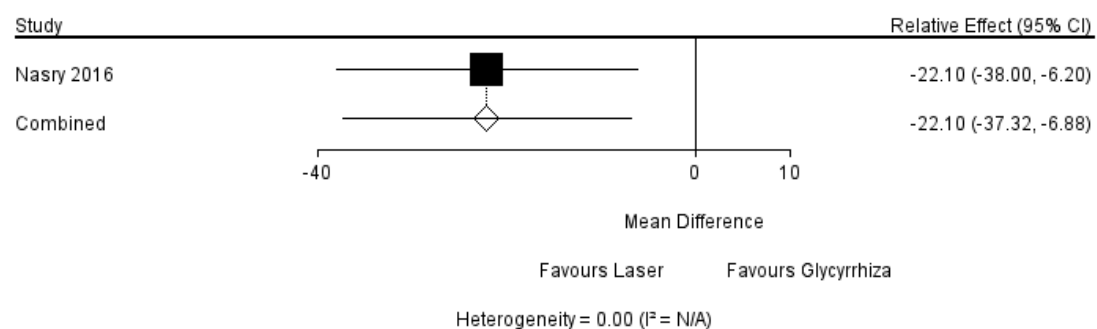

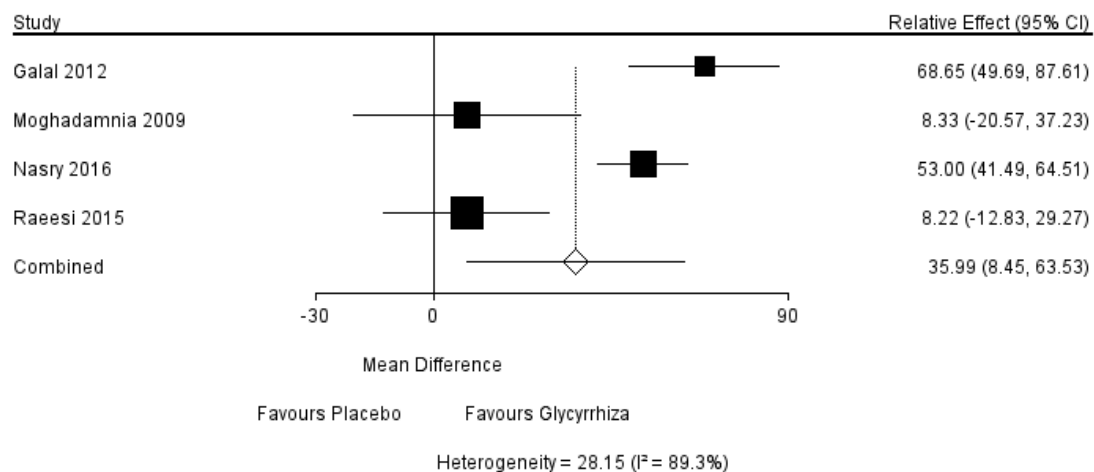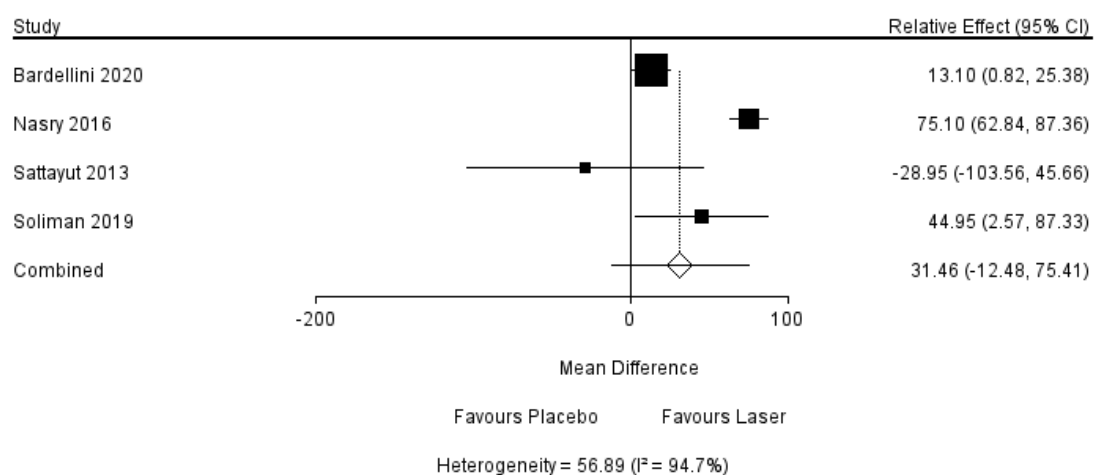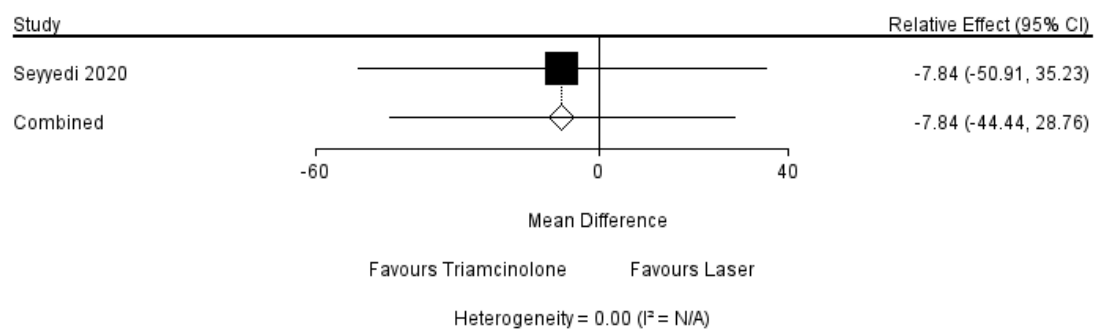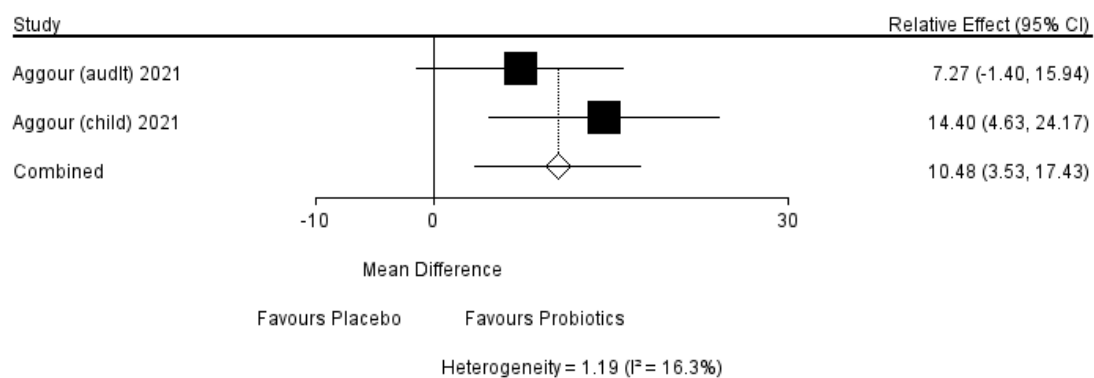

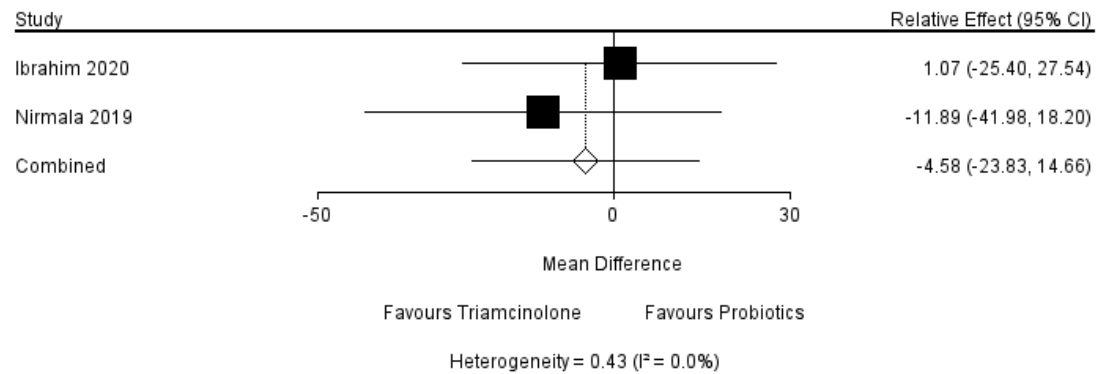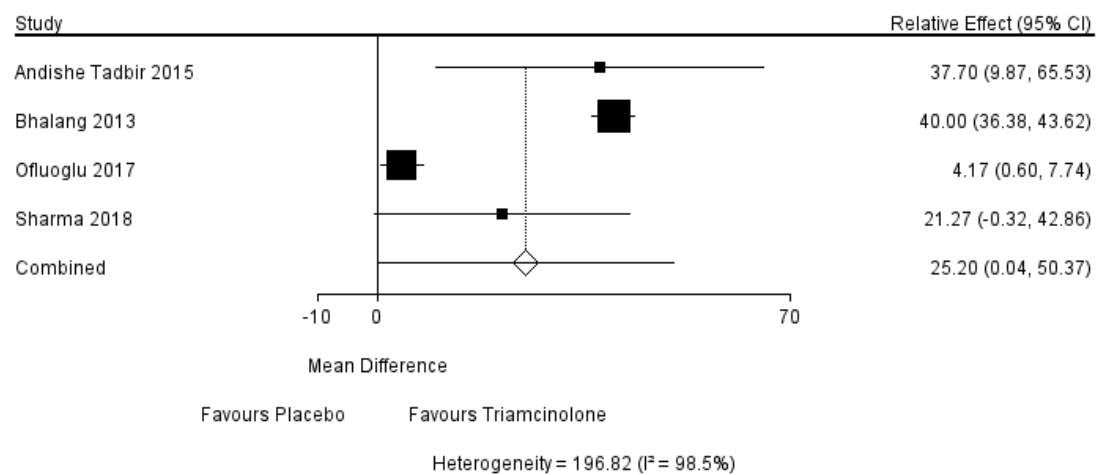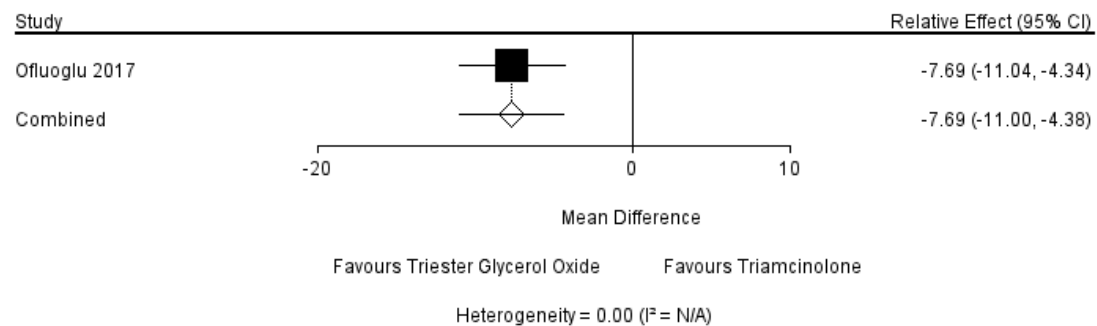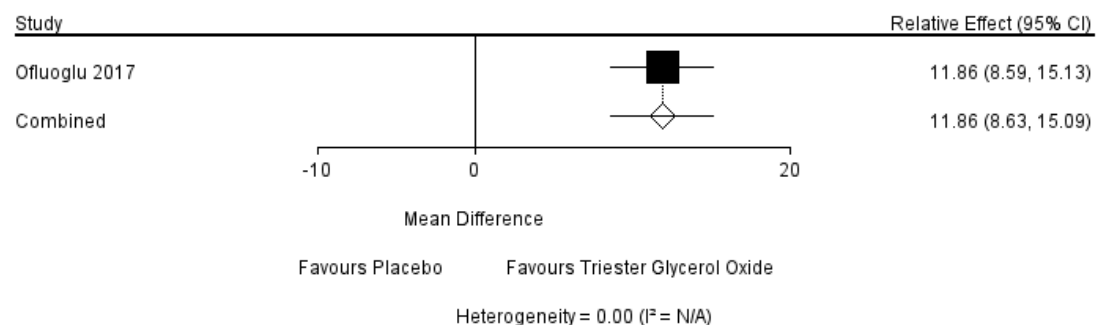

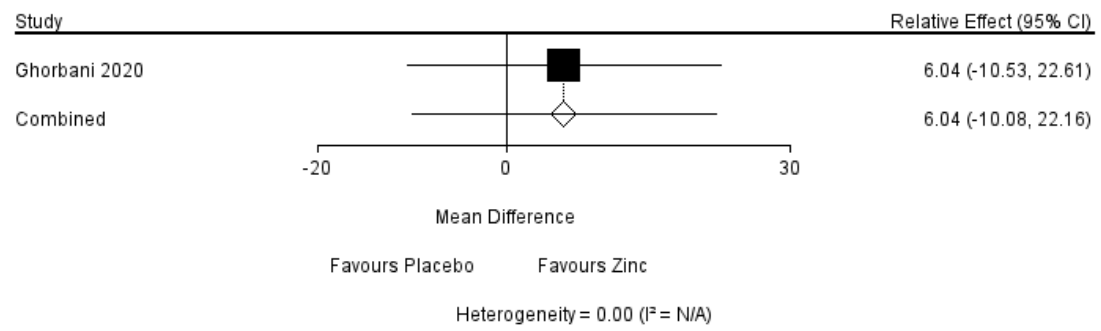



| Comparison                 | NO. of included study | Heterogeneity (I <sup>2</sup> ) | Combined effect [MD (95%CI)] |
|----------------------------|-----------------------|---------------------------------|------------------------------|
| Allicin vs                 |                       |                                 |                              |
| Placebo                    | 1                     | NA                              | 17.40 (2.57, 32.23)          |
| Aloe vs                    |                       |                                 |                              |
| Placebo                    | 3                     | 99.4%                           | 18.99 (-5.32, 43.30)         |
| Triamcinolone              | 1                     | NA                              | -10.00 (-13.42, -6.58)       |
| Amlexanox vs               |                       |                                 |                              |
| Glycyrrhiza                | 1                     | NA                              | 14.80 (-3.05, 32.65)         |
| Laser                      | 1                     | NA                              | -7.30 (-25.60, 11.00)        |
| Placebo                    | 5                     | 95%                             | 44.09 (17.28, 70.90)         |
| Triamcinolone              | 1                     | NA                              | -8.03 (-10.60, -5.46)        |
| Benzydamine vs             |                       |                                 |                              |
| Placebo                    | 1                     | NA                              | 20.85 (-7.04, 48.74)         |
| Triamcinolone              | 1                     | NA                              | -0.42 (-19.71, 18.87)        |
| Quercetin                  | 1                     | NA                              | -15.27 (-29.86, -0.68)       |
| Doxycycline                | 1                     | NA                              | -0.42 (-19.71, 18.87)        |
| Berberine gelatin vs       |                       |                                 |                              |
| Placebo                    | 1                     | NA                              | 16.21 (10.09, 22.33)         |
| Chitosan vs                |                       |                                 |                              |
| Placebo                    | 1                     | NA                              | 33.15 (-26.21, 92.51)        |
| Cryotherapy vs             |                       |                                 |                              |
| Placebo                    | 1                     | NA                              | 1.23 (-25.58, 28.04)         |
| Curcumin vs                |                       |                                 |                              |
| Placebo                    | 1                     | NA                              | 1.95 (-5.93, 9.83)           |
| Triamcinolone              | 4                     | 75.7%                           | 5.72 (-6.58, 18.03)          |
| Dexamethasone vs           |                       |                                 |                              |
| Placebo                    | 1                     | NA                              | 32.06 (10.02, 54.10)         |
| Diosmectite vs             |                       |                                 |                              |
| Placebo                    | 1                     | NA                              | 15.39 (7.40, 23.38)          |
| Doxycycline vs             |                       |                                 |                              |
| Placebo                    | 1                     | NA                              | 21.27 (1.13, 41.41)          |
| Triamcinolone              | 1                     | NA                              | 0 (-0.01, 0.01)              |
| Glycyrrhiza vs             |                       |                                 |                              |
| Laser                      | 1                     | NA                              | -22.10 (-37.32, -6.88)       |
| Placebo                    | 4                     | 89.3%                           | 35.99 (8.45, 63.53)          |
| Laser vs                   |                       |                                 |                              |
| Placebo                    | 4                     | 94.7%                           | 31.46 (-12.48, 75.41)        |
| Triamcinolone              | 1                     | NA                              | -7.84 (-44.44, 28.76)        |
| Probiotics vs              |                       |                                 |                              |
| Triamcinolone              | 2                     | 0%                              | -4.58 (-23.83, 14.66)        |
| Placebo                    | 2                     | 16.3%                           | 10.48 (3.53, 17.43)          |
| Triamcinolone vs           |                       |                                 |                              |
| Triester Glycerol Oxide    | 1                     | NA                              | -7.69 (-11.00, -4.38)        |
| Placebo                    | 4                     | 98.5%                           | 25.20 (0.04, 50.37)          |
| Triester Glycerol Oxide vs |                       |                                 |                              |
| Placebo                    | 1                     | NA                              | 11.86 (8.63, 15.09)          |
| Zinc vs                    |                       |                                 |                              |
| Placebo                    | 1                     | NA                              | 6.04 (-10.08, 22.16)         |

MD, mean difference; CI, confidence interval; NA, not applicable.

## 6. Subgroup Discussion

The 51 RCTs studied for the size-reducing effect had different durations of local intervention and were examined at different times during the trial. The size-reducing effect is discussed separately according to the different examination times.

### Day 1

#### 1. Consistency Model

##### 1.1 Summary estimates

|                         |                          |                          |
|-------------------------|--------------------------|--------------------------|
| Glycyrrhiza             | -14.16 (-176.75, 151.03) | -30.05 (-70.88, 13.06)   |
| 14.16 (-151.03, 176.75) | Laser                    | -16.19 (-175.48, 143.23) |
| 30.05 (-13.06, 70.88)   | 16.19 (-143.23, 175.48)  | Placebo                  |

##### 1.2 Rank probability(Rank 1 is best, rank N is worst)

| Drug        | Rank 1 | Rank 2 | Rank 3 |
|-------------|--------|--------|--------|
| Glycyrrhiza | 0.54   | 0.42   | 0.04   |
| Laser       | 0.44   | 0.14   | 0.42   |
| Placebo     | 0.03   | 0.44   | 0.53   |

##### 1.3 Consistency check

| Parameter                         | Median (95% CI)     |
|-----------------------------------|---------------------|
| Random Effects Standard Deviation | 14.87 (0.80, 28.99) |

##### 1.4 Convergence Diagnostics

| Parameter             | PSRF | Number of chains         | : | 4      |
|-----------------------|------|--------------------------|---|--------|
| d.Placebo.Glycyrrhiza | 1.00 | Tuning iterations        | : | 20,000 |
| d.Placebo.Laser       | 1.00 | Simulation iterations    | : | 50,000 |
| sd.d                  | 1.00 | Thinning interval        | : | 10     |
|                       |      | Inference samples        | : | 10,000 |
|                       |      | Variance scaling factor: | : | 2.5    |

#### 2. Inconsistency Model

##### 2.1 Summary estimates

|                         |                          |                         |
|-------------------------|--------------------------|-------------------------|
| Glycyrrhiza             | -20.64 (-189.90, 145.55) | -30.03 (-70.13, 10.42)  |
| 20.64 (-145.55, 189.90) | Laser                    | -8.58 (-173.98, 152.25) |
| 30.03 (-10.42, 70.13)   | 8.58 (-152.25, 173.98)   | Placebo                 |

##### 2.2 Variance Calculation

| Parameter                         | Median (95% CI)     |
|-----------------------------------|---------------------|
| Random Effects Standard Deviation | 14.83 (1.06, 29.05) |
| Inconsistency Standard Deviation  | 14.67 (0.65, 29.11) |

##### 2.3 Convergence Diagnostics

| Parameter             | PSRF | Number of chains         | : | 4      |
|-----------------------|------|--------------------------|---|--------|
| d.Glycyrrhiza.Placebo | 1.00 | Tuning iterations        | : | 20,000 |
| d.Placebo.Laser       | 1.00 | Simulation iterations    | : | 50,000 |
| sd.d                  | 1.00 | Thinning interval        | : | 10     |
| sd.w                  | 1.00 | Inference samples        | : | 10,000 |
|                       |      | Variance scaling factor: | : | 2.5    |

3. Network structure

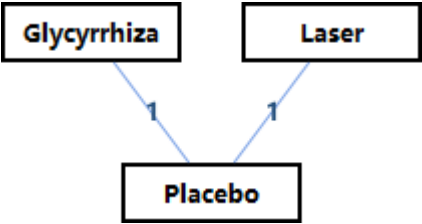

Day 2

1. Consistency Model

1.1 Summary estimates

|                        |                        |                        |                        |                         |                         |
|------------------------|------------------------|------------------------|------------------------|-------------------------|-------------------------|
| Ailcin                 | -13.70 (-63.05, 33.47) | 24.39 (-24.56, 76.19)  | 3.46 (-50.45, 52.71)   | -3.42 (-74.82, 66.63)   | -19.44 (-77.92, 41.05)  |
| 13.70 (-33.47, 63.05)  | Aloe                   | 38.04 (-7.69, 86.27)   | 17.32 (-33.58, 66.82)  | 11.16 (-58.87, 78.60)   | -5.23 (-58.69, 47.65)   |
| -24.39 (-76.19, 24.56) | -38.04 (-86.27, 7.69)  | Amlenox                | -20.67 (-74.21, 25.80) | -27.46 (-99.55, 39.81)  | -43.54 (-105.04, 13.31) |
| -3.46 (-52.71, 50.45)  | -17.32 (-66.82, 33.58) | 20.67 (-25.80, 74.21)  | Berberine gelatin      | -6.51 (-75.23, 62.83)   | -22.27 (-80.93, 39.89)  |
| 3.42 (-66.63, 74.82)   | -11.16 (-78.60, 58.87) | 27.46 (-39.81, 99.55)  | 6.51 (-62.83, 75.23)   | Chitosan                | -15.23 (-96.40, 64.14)  |
| 19.44 (-41.05, 77.92)  | 5.23 (-47.65, 58.69)   | 43.54 (-13.31, 105.04) | 22.27 (-39.89, 80.93)  | 15.23 (-64.14, 96.40)   | Curcumin                |
| 20.43 (-29.62, 72.96)  | 7.17 (-41.92, 55.98)   | 45.37 (-3.54, 98.77)   | 24.13 (-29.14, 74.88)  | 18.08 (-53.83, 86.75)   | 2.04 (-59.84, 62.81)    |
| -21.65 (-68.28, 20.45) | -35.11 (-81.73, 3.81)  | 2.64 (-32.71, 36.02)   | -17.98 (-68.83, 23.22) | -25.38 (-93.64, 40.83)  | -41.14 (-101.38, 13.73) |
| -28.90 (-75.72, 22.05) | -42.53 (-89.37, 6.20)  | -4.37 (-38.90, 35.59)  | -25.72 (-75.87, 23.78) | -31.30 (-102.46, 37.53) | -48.00 (-106.99, 12.56) |
| 17.72 (-16.34, 53.85)  | 4.05 (-29.23, 37.89)   | 42.46 (9.55, 77.85)    | 21.24 (-15.04, 56.95)  | 14.57 (-46.97, 77.06)   | -0.93 (-50.49, 47.71)   |
| 14.27 (-30.08, 60.43)  | 0.78 (-33.48, 34.08)   | 38.95 (-1.04, 82.97)   | 17.93 (-27.47, 60.98)  | 11.33 (-55.84, 77.97)   | -4.35 (-47.24, 37.64)   |
| 12.96 (-36.22, 62.11)  | -0.75 (-44.57, 43.22)  | 37.34 (-8.80, 86.25)   | 16.58 (-32.09, 63.26)  | 10.08 (-59.02, 78.82)   | -5.51 (-62.29, 46.12)   |

|                        |                        |                        |                         |                        |                         |
|------------------------|------------------------|------------------------|-------------------------|------------------------|-------------------------|
| -20.43 (-72.96, 29.62) | 21.65 (-20.45, 68.28)  | 28.90 (-22.05, 75.72)  | -17.72 (-53.85, 16.34)  | -14.27 (-60.43, 30.08) | -12.96 (-62.11, 36.22)  |
| -7.17 (-55.98, 41.92)  | 35.11 (-3.81, 81.73)   | 42.53 (-6.20, 89.37)   | -4.05 (-37.89, 29.23)   | -0.78 (-34.08, 33.48)  | 0.75 (-43.22, 44.57)    |
| -45.37 (-98.77, 3.54)  | -2.64 (-36.02, 32.71)  | 4.37 (-35.59, 38.90)   | -42.46 (-77.85, -9.55)  | -38.95 (-82.97, 1.04)  | -37.34 (-86.25, 8.80)   |
| -24.13 (-74.88, 29.14) | 17.98 (-23.22, 68.83)  | 25.72 (-23.78, 75.87)  | -21.24 (-56.95, 15.04)  | -17.93 (-60.98, 27.47) | -16.58 (-63.26, 32.09)  |
| -18.08 (-86.75, 53.83) | 25.38 (-40.83, 93.64)  | 31.30 (-37.53, 102.46) | -14.57 (-77.06, 46.97)  | -11.33 (-77.97, 55.84) | -10.08 (-78.82, 59.02)  |
| -2.04 (-62.81, 59.84)  | 41.14 (-13.73, 101.38) | 48.00 (-12.56, 106.99) | 0.93 (-47.71, 50.49)    | 4.35 (-37.64, 47.24)   | 5.51 (-46.12, 62.29)    |
| Diosmectite            | 42.32 (-0.88, 90.17)   | 49.22 (-1.65, 99.57)   | 3.04 (-34.10, 39.16)    | 6.30 (-38.01, 50.00)   | 7.81 (-42.61, 58.57)    |
| -42.32 (-90.17, 0.88)  | Glycyrrhiza            | 7.31 (-29.69, 37.57)   | -39.43 (-69.27, -16.29) | -35.99 (-75.90, -1.89) | -34.27 (-78.67, 5.74)   |
| -49.22 (-99.57, 1.65)  | -7.31 (-37.57, 29.69)  | Laser                  | -46.76 (-79.70, -13.87) | -43.37 (-85.77, 0.68)  | -41.94 (-88.73, 7.21)   |
| -3.04 (-39.16, 34.10)  | 39.43 (16.29, 69.27)   | 46.76 (13.87, 79.70)   | Placebo                 | 3.16 (-22.34, 29.02)   | 4.63 (-27.46, 38.14)    |
| -6.30 (-50.00, 38.01)  | 35.99 (1.89, 75.90)    | 43.37 (-0.68, 85.77)   | -3.16 (-29.02, 22.34)   | Triamcinolone          | 1.39 (-31.20, 36.15)    |
| -7.81 (-58.57, 42.61)  | 34.27 (-5.74, 78.67)   | 41.94 (-7.21, 88.73)   | -4.63 (-38.14, 27.46)   | -1.39 (-36.15, 31.20)  | Triester Glycerol Oxide |

1.2 Rank probability(Rank 1 is best, rank N is worst)

| Drug                    | Rank 1 | Rank 2 | Rank 3 | Rank 4 | Rank 5 | Rank 6 | Rank 7 | Rank 8 | Rank 9 | Rank 10 | Rank 11 | Rank 12 |
|-------------------------|--------|--------|--------|--------|--------|--------|--------|--------|--------|---------|---------|---------|
| Allicin                 | 0.02   | 0.03   | 0.04   | 0.16   | 0.29   | 0.23   | 0.08   | 0.04   | 0.04   | 0.03    | 0.03    | 0.02    |
| Aloe                    | 0.01   | 0.01   | 0.01   | 0.02   | 0.05   | 0.11   | 0.18   | 0.17   | 0.15   | 0.13    | 0.09    | 0.06    |
| Amlexanox               | 0.24   | 0.32   | 0.27   | 0.1    | 0.03   | 0.02   | 0.01   | 0.01   | 0      | 0       | 0       | 0       |
| Berberine gelatin       | 0.03   | 0.03   | 0.05   | 0.28   | 0.28   | 0.16   | 0.06   | 0.03   | 0.03   | 0.02    | 0.02    | 0.01    |
| Chitosan                | 0.11   | 0.05   | 0.05   | 0.15   | 0.1    | 0.09   | 0.06   | 0.05   | 0.04   | 0.05    | 0.08    | 0.17    |
| Curcumin                | 0.01   | 0.01   | 0.02   | 0.04   | 0.06   | 0.09   | 0.1    | 0.07   | 0.07   | 0.09    | 0.14    | 0.31    |
| Diosmectite             | 0      | 0.01   | 0.01   | 0.02   | 0.03   | 0.05   | 0.07   | 0.08   | 0.08   | 0.12    | 0.24    | 0.29    |
| Glycyrrhiza             | 0.1    | 0.28   | 0.4    | 0.14   | 0.04   | 0.02   | 0.01   | 0      | 0      | 0       | 0       | 0       |
| Laser                   | 0.47   | 0.26   | 0.14   | 0.06   | 0.03   | 0.01   | 0.01   | 0.01   | 0      | 0       | 0       | 0       |
| Placebo                 | 0      | 0      | 0      | 0      | 0      | 0.02   | 0.06   | 0.12   | 0.19   | 0.29    | 0.25    | 0.05    |
| Triamcinolone           | 0      | 0      | 0.01   | 0.01   | 0.03   | 0.07   | 0.16   | 0.23   | 0.24   | 0.15    | 0.08    | 0.02    |
| Triester Glycerol Oxide | 0.01   | 0.01   | 0.01   | 0.02   | 0.06   | 0.13   | 0.21   | 0.19   | 0.15   | 0.1     | 0.08    | 0.05    |

1.3 Consistency check

| Parameter                         | Median (95% CI)    |
|-----------------------------------|--------------------|
| Random Effects Standard Deviation | 8.88 (0.88, 42.96) |

1.4 Convergence Diagnostics

| Parameter                       | PSRF |                                |
|---------------------------------|------|--------------------------------|
| d.Placebo.Allicin               | 1.00 |                                |
| d.Placebo.Aloe                  | 1.01 |                                |
| d.Placebo.Amlexanox             | 1.00 |                                |
| d.Placebo.Berberinegelatin      | 1.00 |                                |
| d.Placebo.Chitosan              | 1.00 |                                |
| d.Placebo.Diosmectite           | 1.00 |                                |
| d.Placebo.Glycyrrhiza           | 1.00 |                                |
| d.Placebo.Laser                 | 1.00 |                                |
| d.Placebo.Triamcinolone         | 1.00 |                                |
| d.Placebo.TriesterGlycerolOxide | 1.01 |                                |
| d.Triamcinolone.Curcumin        | 1.01 |                                |
| sd.d                            | 1.01 |                                |
|                                 |      | Number of chains : 4           |
|                                 |      | Tuning iterations : 20,000     |
|                                 |      | Simulation iterations : 50,000 |
|                                 |      | Thinning interval : 10         |
|                                 |      | Inference samples : 10,000     |
|                                 |      | Variance scaling factor: 2.5   |

2.Inconsistency Model

2.1 Summary estimates

|                         |                        |                        |                        |
|-------------------------|------------------------|------------------------|------------------------|
| Allicin                 | -14.52 (-42.92, 38.79) | 22.84 (-23.1, 76.80)   | 2.89 (-48.30, 60.30)   |
| Aloe                    | -37.87 (-87.21, 9.07)  | 37.87 (-9.07, 87.91)   | 17.62 (-31.40, 69.32)  |
| Amlexanox               | -17.82 (-69.32, 31.40) | 20.51 (-29.88, 72.43)  | -20.51 (-72.43, 29.88) |
| Berberine gelatin       | -10.56 (-79.25, 65.96) | 28.38 (-43.66, 104.38) | 7.07 (-44.73, 82.59)   |
| Chitosan                | -10.56 (-79.25, 65.96) | 46.15 (-34.98, 106.29) | 25.54 (-35.99, 83.83)  |
| Diosmectite             | -34.83 (-81.42, 6.86)  | 2.90 (-33.08, 36.66)   | -17.47 (-65.13, 28.99) |
| Glycyrrhiza             | 8.36 (-49.22, 57.57)   | 46.24 (-4.59, 97.81)   | 26.01 (-27.89, 80.44)  |
| Laser                   | -20.82 (-71.40, 24.25) | -34.83 (-81.42, 6.86)  | -17.47 (-65.13, 28.99) |
| Triamcinolone           | -42.59 (-89.51, 5.36)  | -4.11 (-40.29, 35.94)  | -24.55 (-74.80, 26.47) |
| Triester Glycerol Oxide | 4.40 (-27.39, 36.15)   | 42.18 (0.28, 77.91)    | 21.90 (-13.70, 60.12)  |
| Curcumin                | 1.24 (-32.11, 34.54)   | 38.90 (-3.08, 83.54)   | 18.96 (-26.42, 63.12)  |
| Placebo                 | -0.30 (-44.82, 44.46)  | 37.57 (-4.46, 87.06)   | 17.43 (-34.09, 66.44)  |

|                         |                         |                        |                        |                        |                         |                        |                          |
|-------------------------|-------------------------|------------------------|------------------------|------------------------|-------------------------|------------------------|--------------------------|
| -1.81 (-79.70, 66.75)   | -21.34 (-83.72, 42.59)  | -22.04 (-72.79, 31.43) | 20.82 (-24.25, 71.40)  | 2.79 (-21.85, 80.26)   | -18.75 (-56.13, 21.71)  | -15.52 (-61.13, 32.61) | -14.29 (-61.57, 39.25)   |
| 10.56 (-65.86, 79.25)   | -8.21 (-61.72, 46.85)   | -8.36 (-57.57, 43.22)  | 94.83 (-6.86, 81.42)   | 42.59 (-53.68, 88.51)  | -4.40 (-38.15, 27.39)   | -1.24 (-34.54, 32.11)  | 0.30 (-44.46, 44.82)     |
| -28.38 (-104.36, 43.66) | -46.16 (-106.23, 14.98) | -46.24 (-97.81, 4.33)  | -2.90 (-36.66, 33.09)  | 4.11 (-35.84, 40.39)   | -42.19 (-77.91, -10.29) | -38.90 (-83.94, 3.08)  | -37.57 (-87.06, 8.46)    |
| -7.07 (-82.59, 64.79)   | -25.94 (-83.81, 35.99)  | -26.01 (-80.44, 27.89) | 17.47 (-26.98, 65.13)  | 24.58 (-26.47, 74.80)  | -21.90 (-60.12, 13.70)  | -18.96 (-63.12, 26.42) | -17.43 (-66.44, 34.09)   |
| Citrus                  | -18.52 (-82.08, 65.99)  | -18.28 (-89.13, 57.87) | 25.42 (-44.81, 97.91)  | 31.88 (-39.15, 107.17) | -14.66 (-76.69, 50.02)  | -11.48 (-78.29, 58.89) | -10.05 (-80.46, 65.66)   |
| 18.52 (-65.99, 92.08)   | Ginger                  | 0.31 (-62.10, 62.69)   | 43.64 (-12.13, 103.03) | 50.26 (-11.97, 109.79) | 3.80 (-47.21, 53.48)    | 7.18 (-36.84, 49.05)   | 8.45 (-47.29, 63.85)     |
| 18.28 (-57.87, 89.71)   | -0.31 (-62.49, 62.10)   | Demerol                | 42.83 (-1.42, 91.64)   | 50.78 (-0.41, 99.02)   | 3.99 (-34.48, 40.79)    | 7.33 (-38.88, 52.39)   | 8.68 (-42.27, 58.83)     |
| -25.42 (-97.81, 41.81)  | -43.64 (-103.03, 12.19) | -42.93 (-91.64, 1.42)  | Glycyrrhiza            | 6.58 (-29.44, 41.29)   | -38.51 (-89.01, -13.13) | -36.01 (-76.48, 0.60)  | -34.38 (-81.70, 6.40)    |
| -31.88 (-107.17, 38.75) | -50.26 (-109.73, 11.97) | -50.78 (-99.02, 0.41)  | -6.58 (-41.29, 29.44)  | Laser                  | -41.02 (-94.48, 22.19)  | -43.83 (-87.08, 0.39)  | -42.35 (-90.66, 6.79)    |
| 14.66 (-50.02, 76.69)   | -38.0 (-53.48, 47.81)   | -3.99 (-40.79, 34.48)  | 39.51 (13.13, 69.01)   | 41.02 (-23.19, 94.48)  | Placebo                 | 3.10 (-23.20, 30.04)   | 4.54 (-29.74, 40.26)     |
| 11.48 (-58.89, 78.29)   | -7.18 (-49.05, 36.84)   | -7.33 (-52.39, 38.39)  | 36.01 (-0.60, 76.48)   | 43.83 (-0.39, 87.08)   | -3.10 (-30.04, 23.20)   | Triprolidine           | 1.46 (-33.76, 35.82)     |
| 10.05 (-65.66, 80.46)   | -8.45 (-63.86, 47.89)   | -8.68 (-56.83, 42.37)  | 34.38 (-6.40, 81.70)   | 42.35 (-47.3, 90.66)   | -4.54 (-40.26, 29.74)   | -1.46 (-35.92, 33.76)  | Triacet-Glycerol-Citrate |

## 2.2 Inconsistency Factors

|                             |                      |
|-----------------------------|----------------------|
| Cycle                       | Median (95% CI)      |
| Glycyrrhiza, Laser, Placebo | 3.60 (-41.97, 68.36) |

## 2.3 Variance Calculation

|                                   |                     |
|-----------------------------------|---------------------|
| Parameter                         | Median (95% CI)     |
| Random Effects Standard Deviation | 8.57 (0.49, 43.70)  |
| Inconsistency Standard Deviation  | 25.73 (1.12, 51.05) |

## 2.4 Convergence Diagnostics

| Parameter                           | PSRF |                                |
|-------------------------------------|------|--------------------------------|
| d.Allicin.Placebo                   | 1.00 |                                |
| d.Aloe.Triamcinolone                | 1.00 |                                |
| d.Glycyrrhiza.Laser                 | 1.01 |                                |
| d.Placebo.Aloe                      | 1.00 | Number of chains : 4           |
| d.Placebo.Amlexanox                 | 1.00 | Tuning iterations : 20,000     |
| d.Placebo.Berberinegelatin          | 1.00 | Simulation iterations : 50,000 |
| d.Placebo.Chitosan                  | 1.04 | Thinning interval : 10         |
| d.Placebo.Diosmectite               | 1.00 | Inference samples : 10,000     |
| d.Placebo.Glycyrrhiza               | 1.00 | Variance scaling factor: 2.5   |
| d.Triamcinolone.Curcumin            | 1.00 |                                |
| d.Triamcinolone.TriesterGlycerol... | 1.00 |                                |
| w.Glycyrrhiza.Laser.Placebo         | 1.01 |                                |
| sd.d                                | 1.01 |                                |
| sd.w                                | 1.00 |                                |

## 3. Node-splitting analysis

| Name               | Direct Effect        | Indirect Effect         | Overall              | P-Value |
|--------------------|----------------------|-------------------------|----------------------|---------|
| Glycyrrhiza, Laser | 9.29 (-28.30, 48.97) | -54.27 (-204.92, 99.93) | 7.31 (-29.69, 37.57) | 0.39    |

## 4. Network structure

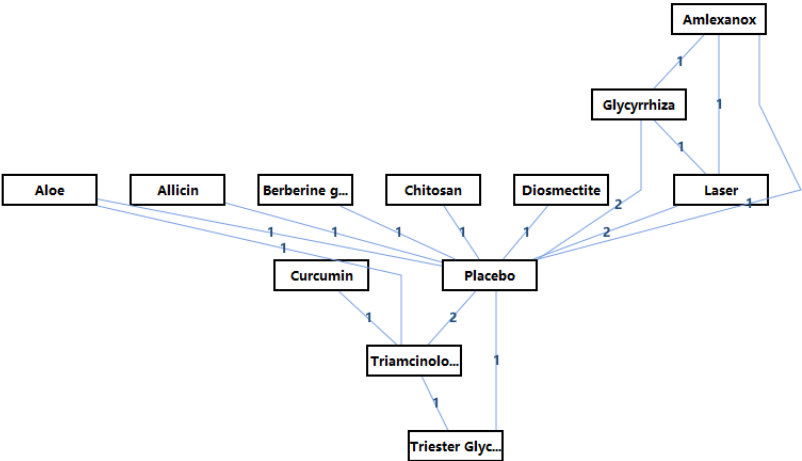

## Day 3

### 1. Consistency Model

#### 1.1 Summary estimates

|                          |                         |                          |                         |
|--------------------------|-------------------------|--------------------------|-------------------------|
| Aloe                     | 38.19 (-85.41, 157.33)  | 36.97 (-100.17, 171.75)  | 64.36 (-79.42, 193.82)  |
| -38.19 (-157.33, 85.41)  | Amlexanox               | -0.88 (-120.99, 122.12)  | 25.24 (-75.82, 124.28)  |
| -36.97 (-171.75, 100.17) | 0.88 (-122.12, 120.99)  | Cyclotherapy             | 28.02 (-116.85, 159.94) |
| -64.36 (-138.82, 79.42)  | -25.24 (-124.28, 75.82) | -28.02 (-159.94, 116.85) | Curcumin                |
| -43.30 (-197.22, 114.54) | -5.34 (-105.16, 87.24)  | -6.60 (-161.55, 148.07)  | 20.01 (-125.54, 157.17) |
| -28.19 (-139.91, 88.75)  | 9.91 (-89.38, 108.56)   | 8.51 (-108.21, 128.42)   | 36.27 (-86.66, 150.99)  |
| -13.08 (-135.08, 132.49) | 26.54 (-72.57, 141.46)  | 23.92 (-103.51, 170.48)  | 51.46 (-54.38, 168.26)  |
| -14.19 (-106.28, 80.00)  | 23.84 (-52.09, 96.89)   | 22.38 (-72.48, 120.71)   | 49.71 (-54.05, 141.86)  |
| -26.69 (-138.12, 86.20)  | 11.10 (-91.32, 108.98)  | 10.18 (-105.20, 130.41)  | 37.40 (-84.90, 148.55)  |
| -69.57 (-183.04, 57.74)  | -31.33 (-102.97, 45.89) | -32.55 (-146.25, 92.68)  | -5.06 (-75.40, 63.26)   |
| -99.84 (-236.93, 37.79)  | -61.77 (-183.72, 58.04) | -63.09 (-201.00, 73.68)  | -35.93 (-177.50, 99.41) |

|                          |                          |                          |                         |                          |                         |                        |
|--------------------------|--------------------------|--------------------------|-------------------------|--------------------------|-------------------------|------------------------|
| 4330 (-114.54, 197.22)   | 28.19 (-88.75, 139.91)   | 13.08 (-132.49, 135.08)  | 14.19 (-80.00, 106.28)  | 26.69 (-86.20, 138.12)   | 69.57 (-57.74, 183.04)  | 99.84 (-37.79, 236.93) |
| 534 (-87.24, 105.16)     | -9.91 (-108.56, 89.38)   | -26.54 (-141.46, 72.57)  | -23.84 (-96.88, 52.09)  | -11.10 (-108.98, 91.32)  | 31.33 (-45.88, 102.97)  | 61.77 (-58.04, 183.72) |
| 660 (-148.07, 161.55)    | -8.51 (-128.42, 108.21)  | -23.92 (-170.48, 103.51) | -22.38 (-120.71, 72.48) | -10.18 (-130.41, 105.20) | 32.55 (-92.66, 146.25)  | 63.09 (-73.68, 201.00) |
| -20.01 (-157.17, 125.54) | -36.27 (-150.99, 86.66)  | -51.46 (-168.26, 54.38)  | -49.71 (-141.86, 54.05) | -37.40 (-148.55, 84.90)  | 5.06 (-63.26, 75.40)    | 35.93 (-99.41, 177.50) |
| Dexamethasone            | -14.88 (-153.05, 122.53) | -31.32 (-189.69, 101.88) | -28.72 (-150.52, 92.26) | -17.33 (-157.99, 121.40) | 25.63 (-100.98, 143.49) | 56.33 (-94.05, 212.52) |
| 14.88 (-122.53, 153.05)  | Glycyrrhiza              | -15.72 (-139.37, 90.66)  | -14.01 (-81.13, 54.60)  | -1.21 (-96.48, 92.59)    | 41.18 (-59.82, 134.15)  | 71.17 (-45.35, 191.41) |
| 31.32 (-101.88, 189.69)  | 15.72 (-90.66, 139.37)   | Laser                    | 2.30 (-82.61, 106.35)   | 14.46 (-93.73, 139.12)   | 57.09 (-24.93, 148.69)  | 87.14 (-35.77, 230.43) |
| 28.72 (-92.26, 150.52)   | 14.01 (-54.60, 81.13)    | -2.30 (-106.35, 82.61)   | Placebo                 | 1.263 (-55.50, 78.63)    | 54.85 (-22.59, 119.89)  | 85.02 (-10.24, 181.86) |
| 17.33 (-121.40, 157.99)  | 1.21 (-92.59, 96.48)     | -14.46 (-139.12, 93.73)  | -12.63 (-78.63, 55.50)  | Probiotics               | 42.73 (-60.68, 133.84)  | 72.26 (-41.47, 189.09) |
| -25.63 (-143.49, 100.98) | -41.18 (-134.15, 53.82)  | -57.09 (-148.69, 24.93)  | -54.85 (-119.89, 22.59) | -42.73 (-133.84, 60.68)  | Triamcinolone           | 30.50 (-85.10, 154.44) |
| -56.33 (-212.52, 94.05)  | -71.17 (-191.41, 45.35)  | -87.14 (-230.43, 35.77)  | -85.02 (-181.86, 102.4) | -72.26 (-189.09, 41.47)  | -30.50 (-154.44, 85.10) | Zinc                   |

### 1.2 Rank probability(Rank 1 is best, rank N is worst)

| Drug          | Rank 1 | Rank 2 | Rank 3 | Rank 4 | Rank 5 | Rank 6 | Rank 7 | Rank 8 | Rank 9 | Rank 10 | Rank 11 |
|---------------|--------|--------|--------|--------|--------|--------|--------|--------|--------|---------|---------|
| Aloe          | 0.01   | 0.03   | 0.03   | 0.04   | 0.05   | 0.05   | 0.07   | 0.08   | 0.1    | 0.17    | 0.37    |
| Amlexanox     | 0.01   | 0.04   | 0.07   | 0.13   | 0.19   | 0.17   | 0.13   | 0.1    | 0.08   | 0.06    | 0.02    |
| Cryotherapy   | 0.06   | 0.11   | 0.08   | 0.1    | 0.1    | 0.1    | 0.1    | 0.08   | 0.08   | 0.1     | 0.09    |
| Curcumin      | 0.14   | 0.19   | 0.18   | 0.13   | 0.1    | 0.07   | 0.05   | 0.04   | 0.04   | 0.04    | 0.02    |
| Dexamethasone | 0.09   | 0.11   | 0.1    | 0.12   | 0.11   | 0.1    | 0.07   | 0.06   | 0.07   | 0.08    | 0.09    |
| Glycyrrhiza   | 0.02   | 0.04   | 0.06   | 0.08   | 0.11   | 0.13   | 0.14   | 0.13   | 0.11   | 0.1     | 0.06    |
| Laser         | 0.01   | 0.03   | 0.04   | 0.07   | 0.07   | 0.09   | 0.1    | 0.09   | 0.11   | 0.16    | 0.24    |
| Placebo       | 0      | 0      | 0      | 0.02   | 0.04   | 0.08   | 0.15   | 0.24   | 0.26   | 0.17    | 0.04    |
| Probiotics    | 0.01   | 0.04   | 0.06   | 0.09   | 0.11   | 0.13   | 0.14   | 0.13   | 0.13   | 0.11    | 0.06    |
| Triamcinolone | 0.08   | 0.27   | 0.27   | 0.16   | 0.09   | 0.05   | 0.03   | 0.02   | 0.01   | 0.01    | 0       |
| Zinc          | 0.57   | 0.14   | 0.09   | 0.06   | 0.04   | 0.03   | 0.02   | 0.02   | 0.01   | 0.01    | 0.01    |



1.3 Consistency check

| Parameter                         | Median (95% CI)      |
|-----------------------------------|----------------------|
| Random Effects Standard Deviation | 36.53 (16.67, 87.26) |

1.4 Convergence Diagnostics

| Parameter                 | PSRF |  |
|---------------------------|------|--|
| d.Amlexanox.Dexamethasone | 1.02 |  |
| d.Placebo.Aloe            | 1.00 |  |
| d.Placebo.Amlexanox       | 1.00 |  |
| d.Placebo.Cryotherapy     | 1.00 |  |
| d.Placebo.Glycyrrhiza     | 1.00 |  |
| d.Placebo.Laser           | 1.00 |  |
| d.Placebo.Probiotics      | 1.00 |  |
| d.Placebo.Triamcinolone   | 1.00 |  |
| d.Placebo.Zinc            | 1.00 |  |
| d.Triamcinolone.Curcumin  | 1.00 |  |
| sd.d                      | 1.00 |  |

Number of chains : 4

Tuning iterations : 20,000

Simulation iterations : 50,000

Thinning interval : 10

Inference samples : 10,000

Variance scaling factor: 2.5

2.Inconsistency Model

2.1 Summary estimates

|                           |                          |                        |                         |                        |                          |                           |                          |
|---------------------------|--------------------------|------------------------|-------------------------|------------------------|--------------------------|---------------------------|--------------------------|
| Aloe                      | 19.11 (-35.30, 91.12)    | 39.55 (-33.87, 107.94) | 29.68 (-40.14, 117.69)  | 20.20 (-51.27, 106.48) | 29.39 (-31.65, 86.17)    | -3.75 (-82.85, 81.56)     | 14.37 (-34.17, 61.82)    |
| -19.11 (-91.12, 35.30)    | Amlexanox                | 17.96 (-59.29, 78.09)  | 10.16 (-43.43, 63.44)   | -0.31 (-48.39, 49.87)  | 10.37 (-52.03, 55.44)    | -24.44 (-90.95, 38.32)    | -4.08 (-54.95, 28.91)    |
| -39.55 (-107.84, 33.87)   | -17.96 (-78.09, 59.29)   | Cryotherapy            | -7.56 (-81.75, 85.25)   | -17.42 (-93.31, 73.94) | -8.81 (-71.59, 55.86)    | -41.25 (-124.12, 49.05)   | -23.64 (-75.70, 31.76)   |
| -29.68 (-117.89, 40.14)   | -10.16 (-63.44, 43.43)   | 7.56 (-85.25, 81.75)   | Curcumin                | -8.80 (-84.11, 62.07)  | 0.56 (-81.18, 63.09)     | -34.33 (-103.13, 30.06)   | -14.88 (-88.12, 40.82)   |
| -20.20 (-106.48, 51.27)   | 0.31 (-49.87, 48.39)     | 17.42 (-73.94, 93.31)  | 8.80 (-62.07, 84.11)    | Dexamethasone          | 10.19 (-74.14, 73.76)    | -25.44 (-107.76, 52.52)   | -4.97 (-77.45, 51.45)    |
| -29.39 (-86.17, 31.65)    | -10.37 (-55.44, 52.03)   | 8.81 (-55.86, 71.59)   | -0.56 (-63.09, 81.18)   | -10.19 (-73.76, 74.14) | Glycyrrhiza              | -33.85 (-105.55, 45.70)   | -15.31 (-48.43, 21.18)   |
| 3.75 (-81.56, 82.85)      | 24.44 (-38.32, 90.95)    | 41.25 (-49.05, 124.12) | 34.33 (-30.06, 103.13)  | 25.44 (-52.52, 107.76) | 33.85 (-45.70, 105.55)   | Laser                     | 46.21 (-46.38, 140.89)   |
| -14.37 (-61.82, 34.17)    | 4.08 (-28.91, 54.95)     | 23.64 (-31.76, 75.70)  | 14.88 (-40.82, 88.12)   | 4.97 (-51.45, 77.45)   | 15.31 (-21.18, 48.43)    | -46.21 (-140.89, 46.38)   | Placebo                  |
| -28.98 (-84.35, 30.06)    | -9.20 (-54.16, 52.98)    | 10.11 (-53.25, 71.11)  | 0.92 (-61.16, 81.71)    | -8.59 (-72.27, 71.65)  | 0.86 (-46.33, 47.52)     | -32.63 (-103.51, 45.91)   | -13.96 (-46.30, 18.86)   |
| -31.19 (-113.33, 25.73)   | -11.65 (-58.33, 22.23)   | 5.31 (-85.60, 66.04)   | -2.72 (-43.98, 30.16)   | -12.04 (-81.30, 45.68) | -1.54 (-78.01, 45.30)    | -37.45 (-98.37, 14.71)    | -94.02 (-133.75, -30.18) |
| -100.09 (-166.94, -34.05) | -80.12 (-136.76, -85.59) | -61.70 (-136.33, 8.67) | -70.77 (-143.61, 16.48) | -78.98 (-152.83, 7.37) | -70.65 (-132.69, -12.11) | -105.03 (-186.21, -19.66) | -85.26 (-124.62, -36.60) |

|                          |                         |                        |
|--------------------------|-------------------------|------------------------|
| 28.58 (-30.06, 84.35)    | 31.19 (-25.73, 113.33)  | 100.09 (34.05, 166.94) |
| 9.20 (-52.98, 54.16)     | 11.65 (-22.23, 58.33)   | 80.12 (8.59, 136.76)   |
| -10.11 (-71.11, 53.25)   | -5.31 (-68.04, 55.60)   | 61.70 (-8.67, 136.33)  |
| -0.92 (-81.71, 61.16)    | 2.72 (-30.16, 43.98)    | 70.77 (-16.48, 143.61) |
| 8.59 (-71.65, 72.27)     | 12.04 (-45.68, 61.30)   | 78.98 (-7.37, 152.83)  |
| -0.86 (-47.52, 46.33)    | 1.54 (-45.30, 78.01)    | 70.65 (12.11, 132.69)  |
| 32.63 (-45.91, 103.51)   | 37.45 (-14.71, 98.37)   | 105.03 (19.66, 186.21) |
| 13.96 (-18.86, 46.30)    | 94.02 (30.18, 133.75)   | 85.26 (36.60, 134.62)  |
| Probiotics               | 2.78 (-44.62, 78.82)    | 71.86 (12.05, 132.34)  |
| -2.78 (-78.82, 44.62)    | Triamcinolone           | 67.76 (-15.47, 130.03) |
| -71.86 (-132.34, -12.05) | -67.76 (-130.03, 15.47) | Zinc                   |

## 2.2 Inconsistency Factors

| Cycle                                    | Median (95% CI)         |
|------------------------------------------|-------------------------|
| Amlexanox, Laser, Placebo, Triamcinolone | -27.88 (-122.82, 59.06) |
| Amlexanox, Placebo, Triamcinolone        | 76.53 (-8.08, 123.31)   |

## 2.3 Variance Calculation

| Parameter                         | Median (95% CI)       |
|-----------------------------------|-----------------------|
| Random Effects Standard Deviation | 11.67 (0.98, 55.76)   |
| Inconsistency Standard Deviation  | 67.12 (16.68, 100.02) |

## 2.4 Convergence Diagnostics

| Parameter                         | PSRF |  |
|-----------------------------------|------|--|
| d.Aloe.Placebo                    | 1.00 |  |
| d.Amlexanox.Dexamethasone         | 1.19 |  |
| d.Amlexanox.Triamcinolone         | 1.01 |  |
| d.Placebo.Amlexanox               | 1.00 |  |
| d.Placebo.Cryotherapy             | 1.01 |  |
| d.Placebo.Glycyrrhiza             | 1.00 |  |
| d.Placebo.Probiotics              | 1.01 |  |
| d.Placebo.Zinc                    | 1.01 |  |
| d.Triamcinolone.Curcumin          | 1.01 |  |
| d.Triamcinolone.Laser             | 1.00 |  |
| w.Amlexanox.Placebo.Laser.Tria... | 1.00 |  |
| w.Amlexanox.Placebo.Triamcinol... | 1.00 |  |
| sd.d                              | 1.01 |  |
| sd.w                              | 1.00 |  |

Number of chains : 4

Tuning iterations : 20,000

Simulation iterations : 50,000

Thinning interval : 10

Inference samples : 10,000

Variance scaling factor: 2.5

## 3. Node-splitting analysis

| Name                     | Direct Effect          | Indirect Effect         | Overall                | P-Value |
|--------------------------|------------------------|-------------------------|------------------------|---------|
| Amlexanox, Placebo       | -3.24 (-73.90, 61.95)  | -80.03 (-150.79, 36.17) | -23.84 (-96.88, 52.09) | 0.17    |
| Amlexanox, Triamcinolone | 10.14 (-53.70, 74.47)  | 89.12 (-22.73, 152.94)  | 31.33 (-45.89, 102.97) | 0.14    |
| Laser, Placebo           | 82.29 (-60.65, 226.22) | -38.33 (-165.77, 80.37) | 2.30 (-82.61, 106.35)  | 0.18    |
| Laser, Triamcinolone     | 29.42 (-68.30, 126.55) | 150.30 (-8.90, 309.08)  | 57.09 (-24.93, 148.69) | 0.19    |
| Placebo, Triamcinolone   | 100.84 (55.85, 147.26) | 11.02 (-53.67, 49.37)   | 54.85 (-22.59, 119.89) | 0.01    |

4. Network structure

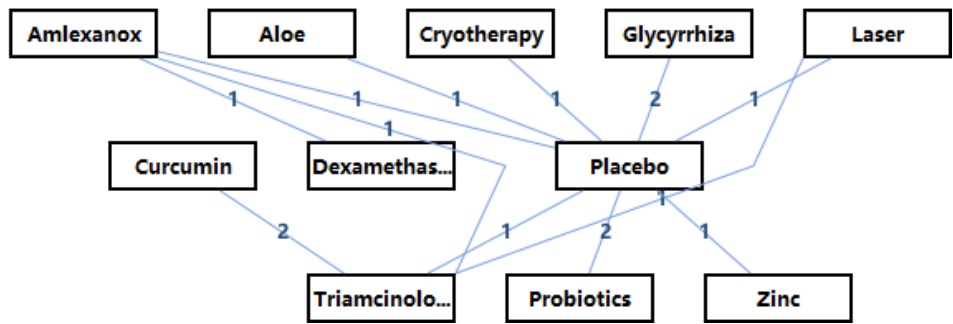

Day 4

1. Consistency Model

1.1 Summary estimates

|                          |                          |                         |                          |                          |                          |                          |                          |                          |
|--------------------------|--------------------------|-------------------------|--------------------------|--------------------------|--------------------------|--------------------------|--------------------------|--------------------------|
| Allien                   | 14.63 (-108.29, 133.33)  | 25.41 (-115.31, 172.80) | -5.19 (-151.54, 147.72)  | -2.32 (-165.35, 158.56)  | -13.88 (-145.68, 114.23) | -18.56 (-172.65, 129.70) | 46.95 (-94.16, 197.67)   | 19.40 (-114.60, 154.81)  |
| -14.63 (-133.33, 108.29) | Amlexanox                | 11.37 (-103.17, 127.86) | -19.08 (-136.15, 103.57) | -16.99 (-148.05, 113.56) | -27.47 (-124.23, 64.81)  | -32.59 (-154.28, 86.94)  | 33.47 (-78.72, 151.35)   | 5.60 (-89.76, 101.33)    |
| -25.41 (-172.80, 115.31) | -11.37 (-127.86, 103.17) | Benzodamine             | -29.89 (-177.77, 117.81) | -28.69 (-187.29, 123.14) | -38.73 (-159.67, 69.28)  | -43.70 (-194.77, 95.94)  | 22.18 (-86.46, 131.08)   | -5.81 (-133.09, 116.87)  |
| 5.19 (-147.72, 151.54)   | 19.08 (-103.57, 136.15)  | 29.89 (-117.81, 177.77) | Berberine gillain        | 2.21 (-157.49, 158.60)   | -8.41 (-146.26, 117.13)  | -14.45 (-169.09, 138.11) | 52.02 (-94.71, 202.76)   | 24.27 (-107.59, 156.61)  |
| 2.32 (-158.56, 165.35)   | 16.99 (-113.56, 148.05)  | 28.69 (-123.14, 181.29) | -2.21 (-158.60, 157.49)  | Chitosan                 | -11.65 (-157.21, 132.40) | -16.01 (-180.53, 146.44) | 51.18 (-105.34, 210.60)  | 22.31 (-120.39, 165.57)  |
| 13.68 (-114.23, 145.68)  | 27.47 (-64.81, 124.29)   | 38.73 (-69.28, 159.67)  | 8.41 (-117.13, 146.28)   | 11.65 (-132.40, 157.21)  | Curcumin                 | -5.64 (-125.63, 133.96)  | -16.01 (-180.53, 146.44) | 51.18 (-105.34, 210.60)  |
| 18.56 (-129.70, 172.65)  | 32.59 (-86.84, 154.28)   | 43.70 (-95.94, 194.77)  | 14.45 (-138.11, 169.09)  | 16.01 (-146.44, 180.53)  | 5.64 (-125.63, 133.96)   | Diclofenac               | 66.63 (-79.29, 217.37)   | 38.61 (-92.49, 170.16)   |
| -46.95 (-197.67, 94.16)  | -33.47 (-151.35, 78.72)  | -22.18 (-131.08, 86.46) | -52.02 (-202.76, 94.71)  | -51.18 (-210.60, 105.34) | -61.30 (-179.14, 47.45)  | -66.63 (-217.37, 79.29)  | Doxycycline              | -27.81 (-156.47, 94.76)  |
| -19.40 (-154.81, 114.60) | -5.60 (-101.33, 89.76)   | 5.81 (-116.87, 133.09)  | -24.27 (-156.61, 107.59) | -22.31 (-165.57, 120.39) | -33.16 (-144.68, 74.74)  | -38.61 (-170.16, 92.49)  | 27.81 (-94.76, 156.47)   | Laser                    |
| 19.93 (-85.93, 130.86)   | 34.68 (-20.72, 88.08)    | 45.62 (-49.84, 152.46)  | 15.88 (-85.74, 124.77)   | 17.90 (-103.62, 138.48)  | 7.03 (-70.13, 81.84)     | 2.30 (-104.81, 107.15)   | 67.70 (-28.64, 171.38)   | 40.11 (-36.50, 118.89)   |
| -47.37 (-228.94, 130.28) | -32.95 (-192.07, 118.71) | -22.39 (-125.66, 85.11) | -51.89 (-233.57, 128.13) | -49.98 (-243.51, 135.97) | -60.34 (-220.75, 90.50)  | -66.27 (-248.85, 114.44) | -0.00 (-152.86, 151.93)  | -27.13 (-193.59, 135.33) |
| -30.78 (-157.23, 93.17)  | -16.03 (-105.31, 67.90)  | -5.15 (-102.31, 97.84)  | -34.70 (-157.92, 93.15)  | -32.82 (-172.74, 105.59) | -43.80 (-116.47, 20.79)  | -49.76 (-178.77, 74.40)  | 17.51 (-80.08, 117.80)   | -10.94 (-112.85, 91.77)  |
| -14.09 (-161.01, 132.24) | 0.09 (-115.99, 109.55)   | 10.66 (-118.03, 143.74) | -18.10 (-163.00, 127.11) | -16.32 (-173.94, 134.15) | -27.36 (-144.31, 83.50)  | -33.24 (-182.47, 113.57) | 33.88 (-98.11, 168.15)   | 5.16 (-122.30, 128.27)   |

|                          |                         |                          |                          |
|--------------------------|-------------------------|--------------------------|--------------------------|
| -19.93 (-130.86, 85.93)  | 47.37 (-130.28, 228.94) | 30.78 (-93.17, 157.23)   | 14.09 (-132.24, 161.01)  |
| -34.68 (-88.08, 20.72)   | 32.95 (-118.71, 192.07) | 16.03 (-67.90, 106.31)   | -0.09 (-109.55, 115.99)  |
| -45.62 (-152.46, 49.84)  | 22.39 (-85.11, 125.66)  | 5.15 (-97.84, 102.31)    | -10.86 (-143.74, 118.03) |
| -15.88 (-124.77, 85.74)  | 51.89 (-128.13, 233.57) | 34.70 (-93.75, 157.92)   | 18.10 (-127.11, 163.00)  |
| -17.90 (-138.48, 103.62) | 49.98 (-135.97, 243.51) | 32.82 (-105.59, 172.74)  | 16.32 (-134.15, 173.34)  |
| -7.03 (-81.84, 70.13)    | 60.34 (-90.50, 220.75)  | 43.80 (-20.79, 116.47)   | 27.36 (-83.50, 144.31)   |
| -2.30 (-107.15, 104.81)  | 66.27 (-114.44, 248.85) | 49.76 (-74.40, 178.77)   | 33.24 (-113.57, 182.47)  |
| -67.70 (-171.38, 28.64)  | 0.00 (-151.93, 152.86)  | -17.51 (-117.80, 80.88)  | -33.89 (-188.15, 98.11)  |
| -40.11 (-118.89, 36.50)  | 27.13 (-135.33, 193.59) | 10.94 (-91.77, 112.85)   | -5.16 (-128.27, 122.30)  |
| Placebo                  | 67.39 (-74.27, 214.42)  | 51.01 (-12.04, 118.39)   | 34.50 (-60.31, 136.84)   |
| -67.39 (-214.42, 74.27)  | Quercetin               | -17.05 (-164.83, 127.47) | -33.39 (-203.08, 134.07) |
| -51.01 (-118.39, 12.04)  | 17.05 (-127.47, 164.83) | Thimerochlorine          | -15.83 (-115.14, 81.26)  |
| -34.50 (-136.84, 60.31)  | 33.39 (-134.07, 203.08) | 15.83 (-81.26, 115.14)   | Triester Glycerol Oxide  |

### 1.2 Rank probability(Rank 1 is best, rank N is worst)

| Drug                    | Rank 1 | Rank 2 | Rank 3 | Rank 4 | Rank 5 | Rank 6 | Rank 7 | Rank 8 | Rank 9 | Rank 10 | Rank 11 | Rank 12 | Rank 13 |
|-------------------------|--------|--------|--------|--------|--------|--------|--------|--------|--------|---------|---------|---------|---------|
| Allicin                 | 0.06   | 0.06   | 0.06   | 0.06   | 0.07   | 0.08   | 0.07   | 0.08   | 0.08   | 0.08    | 0.08    | 0.1     | 0.12    |
| Amlexanox               | 0.03   | 0.05   | 0.08   | 0.1    | 0.12   | 0.13   | 0.14   | 0.13   | 0.09   | 0.06    | 0.04    | 0.03    | 0.01    |
| Benzylamine             | 0.04   | 0.13   | 0.13   | 0.12   | 0.11   | 0.1    | 0.08   | 0.08   | 0.06   | 0.05    | 0.05    | 0.04    | 0.02    |
| Berberine gelatin       | 0.05   | 0.05   | 0.05   | 0.06   | 0.06   | 0.07   | 0.07   | 0.08   | 0.08   | 0.09    | 0.09    | 0.12    | 0.14    |
| Chitosan                | 0.08   | 0.07   | 0.06   | 0.06   | 0.06   | 0.06   | 0.06   | 0.07   | 0.07   | 0.06    | 0.08    | 0.1     | 0.18    |
| Curcumin                | 0      | 0.01   | 0.02   | 0.03   | 0.05   | 0.07   | 0.08   | 0.1    | 0.12   | 0.12    | 0.14    | 0.14    | 0.12    |
| Diosmectite             | 0.03   | 0.04   | 0.04   | 0.04   | 0.05   | 0.05   | 0.06   | 0.07   | 0.08   | 0.08    | 0.1     | 0.14    | 0.23    |
| Doxycycline             | 0.23   | 0.18   | 0.14   | 0.1    | 0.08   | 0.07   | 0.06   | 0.04   | 0.03   | 0.02    | 0.02    | 0.02    | 0.01    |
| Laser                   | 0.07   | 0.09   | 0.1    | 0.1    | 0.1    | 0.1    | 0.1    | 0.09   | 0.08   | 0.06    | 0.04    | 0.04    | 0.02    |
| Placebo                 | 0      | 0      | 0      | 0      | 0.01   | 0.01   | 0.04   | 0.08   | 0.15   | 0.24    | 0.25    | 0.17    | 0.05    |
| Quercetin               | 0.31   | 0.14   | 0.09   | 0.07   | 0.06   | 0.05   | 0.05   | 0.04   | 0.04   | 0.04    | 0.03    | 0.04    | 0.04    |
| Triamcinolone           | 0.05   | 0.1    | 0.15   | 0.17   | 0.16   | 0.12   | 0.1    | 0.07   | 0.04   | 0.02    | 0.01    | 0.01    | 0       |
| Triester Glycerol Oxide | 0.07   | 0.08   | 0.08   | 0.09   | 0.09   | 0.09   | 0.09   | 0.08   | 0.08   | 0.07    | 0.06    | 0.06    | 0.05    |

### 1.3 Consistency check

|                                   |                      |
|-----------------------------------|----------------------|
| Parameter                         | Median (95% CI)      |
| Random Effects Standard Deviation | 46.52 (26.29, 91.77) |

1.4 Convergence Diagnostics

| Parameter                       | PSRF | <div>Number of chains : 4</div> <div>Tuning iterations : 20,000</div> <div>Simulation iterations : 50,000</div> <div>Thinning interval : 10</div> <div>Inference samples : 10,000</div> <div>Variance scaling factor: 2.5</div> |
|---------------------------------|------|---------------------------------------------------------------------------------------------------------------------------------------------------------------------------------------------------------------------------------|
| d.Benzylamine.Doxycline         | 1.00 |                                                                                                                                                                                                                                 |
| d.Benzylamine.Placebo           | 1.00 |                                                                                                                                                                                                                                 |
| d.Benzylamine.Quercetin         | 1.00 |                                                                                                                                                                                                                                 |
| d.Benzylamine.Triamcinolone     | 1.00 |                                                                                                                                                                                                                                 |
| d.Placebo.Allicin               | 1.00 |                                                                                                                                                                                                                                 |
| d.Placebo.Amlexanox             | 1.00 |                                                                                                                                                                                                                                 |
| d.Placebo.Berberinegelatin      | 1.00 |                                                                                                                                                                                                                                 |
| d.Placebo.Chitosan              | 1.00 |                                                                                                                                                                                                                                 |
| d.Placebo.Curcumin              | 1.00 |                                                                                                                                                                                                                                 |
| d.Placebo.Diosmectite           | 1.00 |                                                                                                                                                                                                                                 |
| d.Placebo.Laser                 | 1.00 |                                                                                                                                                                                                                                 |
| d.Placebo.TriesterGlycerolOxide | 1.00 |                                                                                                                                                                                                                                 |
| sd.d                            | 1.00 |                                                                                                                                                                                                                                 |

2.Inconsistency Model

2.1 Summary estimates

|                          |                         |                          |                          |                          |                          |                          |                         |
|--------------------------|-------------------------|--------------------------|--------------------------|--------------------------|--------------------------|--------------------------|-------------------------|
| Allicin                  | 14.24 (-111.41, 137.57) | 25.03 (-128.28, 178.16)  | -4.52 (-159.50, 153.10)  | -1.63 (-168.95, 162.59)  | -15.19 (-156.57, 127.83) | -19.62 (-174.90, 137.87) | 48.33 (-98.34, 201.34)  |
| -14.24 (-137.57, 111.41) | Amlexanox               | 10.97 (-107.55, 128.90)  | -18.73 (-140.09, 102.16) | -15.60 (-155.00, 116.29) | -28.96 (-136.53, 75.92)  | -34.64 (-156.83, 88.02)  | 34.12 (-82.90, 148.91)  |
| -25.03 (-178.16, 128.28) | Benzylamine             | 29.56 (-124.03, 179.21)  | -29.56 (-179.21, 124.03) | -27.03 (-189.52, 136.25) | -39.58 (-161.29, 83.01)  | -43.31 (-197.65, 101.71) | 23.50 (-87.26, 139.72)  |
| 452 (-153.10, 159.50)    | Berberine gelatin       | 27.03 (-136.25, 189.52)  | -3.33 (-167.87, 162.21)  | 3.33 (-162.21, 167.87)   | -10.11 (-154.66, 129.74) | -15.20 (-170.81, 139.97) | 53.00 (-95.12, 204.81)  |
| 163 (-162.59, 168.95)    | Chitosan                | 15.60 (-116.29, 155.00)  | 10.11 (-129.74, 154.66)  | 13.82 (-140.34, 161.04)  | -13.82 (-161.04, 140.34) | -17.45 (-181.10, 147.32) | 50.71 (-112.66, 218.39) |
| 15.19 (-127.83, 156.57)  | Curcumin                | 28.96 (-75.92, 136.33)   | 15.20 (-139.97, 170.81)  | 17.45 (-147.32, 181.10)  | -5.14 (-144.77, 136.31)  | -62.98 (-56.74, 183.55)  | 62.98 (-56.74, 183.55)  |
| 19.62 (-137.87, 174.90)  | Diosmectite             | 34.64 (-88.02, 156.83)   | 15.20 (-139.97, 170.81)  | 17.45 (-147.32, 181.10)  | 5.14 (-136.31, 144.77)   | 67.13 (-80.15, 221.72)   | 67.13 (-80.15, 221.72)  |
| -48.33 (-201.34, 98.34)  | Doxycline               | -34.12 (-148.91, 82.90)  | -53.00 (-204.81, 95.12)  | -50.71 (-218.39, 112.66) | -62.98 (-183.55, 56.74)  | -67.13 (-221.72, 80.15)  | 29.21 (-100.74, 159.67) |
| -18.75 (-157.93, 115.94) |                         | -4.76 (-101.83, 91.04)   | -22.56 (-160.81, 110.84) | -20.29 (-176.66, 125.29) | -33.91 (-156.94, 81.43)  | -38.10 (-172.96, 98.67)  | 29.21 (-100.74, 159.67) |
| 20.59 (-91.01, 133.50)   |                         | 35.19 (-19.92, 89.70)    | 46.12 (-57.92, 149.35)   | 17.18 (-92.39, 125.24)   | 7.88 (-80.06, 92.36)     | 1.32 (-108.84, 112.57)   | 68.89 (-32.28, 175.38)  |
| -45.94 (-232.01, 142.21) |                         | -32.22 (-186.67, 128.75) | -21.57 (-131.88, 86.60)  | -51.58 (-236.70, 139.03) | -61.42 (-225.25, 98.20)  | -65.92 (-253.94, 115.92) | 1.57 (-150.59, 162.57)  |
| -30.01 (-163.01, 98.81)  |                         | -16.42 (-108.37, 71.32)  | -6.08 (-108.39, 97.44)   | -35.25 (-165.69, 95.16)  | -45.35 (-118.53, 24.07)  | -50.31 (-182.54, 78.40)  | 18.01 (-82.84, 118.08)  |
| -14.38 (-168.28, 135.69) |                         | -0.41 (-115.64, 116.18)  | 10.39 (-126.56, 144.52)  | -19.91 (-165.20, 127.10) | -28.73 (-153.31, 86.54)  | -34.07 (-184.25, 113.60) | 34.27 (-99.18, 167.25)  |

|                          |                          |                         |                          |                          |
|--------------------------|--------------------------|-------------------------|--------------------------|--------------------------|
| 18.75 (-115.94, 157.93)  | -2059 (-133.50, 91.01)   | 45.94 (-142.21, 232.01) | 30.01 (-98.81, 163.01)   | 14.38 (-135.69, 168.28)  |
| 4.76 (-91.04, 101.83)    | -35.19 (-89.70, 19.92)   | 32.22 (-128.75, 186.67) | 16.42 (-71.32, 108.37)   | 0.41 (-116.18, 115.64)   |
| -6.07 (-134.89, 126.36)  | -46.12 (-149.35, 57.92)  | 21.57 (-86.60, 131.68)  | 6.08 (-97.44, 108.39)    | -10.39 (-144.52, 126.56) |
| 22.56 (-110.84, 160.81)  | -17.18 (-125.24, 92.99)  | 51.58 (-139.03, 236.70) | 35.25 (-95.16, 165.69)   | 19.91 (-127.10, 165.20)  |
| 20.29 (-125.29, 176.66)  | -19.66 (-142.22, 106.58) | 48.24 (-143.13, 247.17) | 32.02 (-108.85, 180.07)  | 16.84 (-141.34, 174.52)  |
| 33.91 (-81.43, 156.94)   | -7.88 (-92.36, 80.06)    | 61.42 (-98.20, 225.25)  | 45.35 (-24.07, 118.53)   | 28.73 (-86.54, 153.31)   |
| 38.10 (-98.67, 172.96)   | -1.32 (-112.57, 108.84)  | 65.92 (-115.92, 253.94) | 50.31 (-78.40, 182.54)   | 34.07 (-113.60, 184.25)  |
| -29.21 (-159.67, 100.74) | -68.89 (-175.38, 32.28)  | -1.57 (-162.57, 150.59) | -18.01 (-118.08, 82.84)  | -34.27 (-167.25, 99.18)  |
| Laser                    | -40.13 (-121.23, 37.62)  | 28.06 (-143.14, 194.84) | 11.78 (-94.73, 119.10)   | -4.63 (-133.32, 124.61)  |
| 40.13 (-37.62, 121.23)   | Placebo                  | 67.43 (-82.80, 215.71)  | 51.77 (-16.77, 125.45)   | 35.39 (-65.20, 138.28)   |
| -28.06 (-194.84, 143.14) | -67.43 (-215.71, 82.80)  | Quercetin               | -15.38 (-161.40, 132.40) | -32.23 (-203.02, 143.53) |
| -11.78 (-119.10, 94.73)  | -51.77 (-125.45, 16.77)  | 15.38 (-132.40, 161.40) | Triamcinolone            | -16.43 (-118.37, 84.08)  |
| 4.63 (-124.61, 133.32)   | -35.39 (-138.28, 65.20)  | 32.23 (-143.53, 203.02) | 16.43 (-84.08, 118.37)   | Triester Glycerol Oxide  |

### 2.2 Inconsistency Factors

| Cycle                            | Median (95% CI)      |
|----------------------------------|----------------------|
| Curcumin, Placebo, Triamcinolone | 0.78 (-85.57, 87.20) |

### 2.3 Variance Calculation

| Parameter                         | Median (95% CI)      |
|-----------------------------------|----------------------|
| Random Effects Standard Deviation | 48.70 (27.52, 92.50) |
| Inconsistency Standard Deviation  | 45.97 (2.49, 106.18) |

### 2.4 Convergence Diagnostics

| Parameter                           | PSRF |                                                                                                                                                                              |
|-------------------------------------|------|------------------------------------------------------------------------------------------------------------------------------------------------------------------------------|
| d.Allicin.Placebo                   | 1.00 | Number of chains : 4<br>Tuning iterations : 20,000<br>Simulation iterations : 50,000<br>Thinning interval : 10<br>Inference samples : 10,000<br>Variance scaling factor: 2.5 |
| d.Benzydamine.Doxycycline           | 1.00 |                                                                                                                                                                              |
| d.Benzydamine.Quercetin             | 1.00 |                                                                                                                                                                              |
| d.Benzydamine.Triamcinolone         | 1.00 |                                                                                                                                                                              |
| d.Placebo.Amlexanox                 | 1.00 |                                                                                                                                                                              |
| d.Placebo.Benzydamine               | 1.00 |                                                                                                                                                                              |
| d.Placebo.Berberinegelatin          | 1.00 |                                                                                                                                                                              |
| d.Placebo.Chitosan                  | 1.00 |                                                                                                                                                                              |
| d.Placebo.Diosmectite               | 1.00 |                                                                                                                                                                              |
| d.Placebo.Laser                     | 1.00 |                                                                                                                                                                              |
| d.Triamcinolone.Curcumin            | 1.00 |                                                                                                                                                                              |
| d.Triamcinolone.TriesterGlycerol... | 1.00 |                                                                                                                                                                              |
| w.Curcumin.Placebo.Triamcinolo...   | 1.00 |                                                                                                                                                                              |
| sd.d                                | 1.00 |                                                                                                                                                                              |
| sd.w                                | 1.00 |                                                                                                                                                                              |

3. Node-splitting analysis

| Name                       | Direct Effect            | Indirect Effect         | Overall                 | P-Value |
|----------------------------|--------------------------|-------------------------|-------------------------|---------|
| Benzydamine, Placebo       | -72.90 (-176.97, 26.31)  | 10.29 (-114.57, 130.70) | -45.62 (-152.46, 49.84) | 0.23    |
| Benzydamine, Triamcinolone | 31.20 (-69.80, 130.93)   | -51.46 (-176.19, 82.66) | 5.15 (-97.84, 102.31)   | 0.27    |
| Curcumin, Placebo          | -10.02 (-130.15, 112.82) | -5.08 (-120.90, 122.67) | -7.03 (-81.84, 70.13)   | 0.94    |
| Curcumin, Triamcinolone    | 46.37 (-36.96, 135.10)   | 41.15 (-103.00, 185.63) | 43.80 (-20.79, 116.47)  | 0.95    |
| Placebo, Triamcinolone     | 51.33 (-31.39, 135.71)   | 56.45 (-90.55, 210.36)  | 51.01 (-12.04, 118.39)  | 0.94    |

4. Network structure

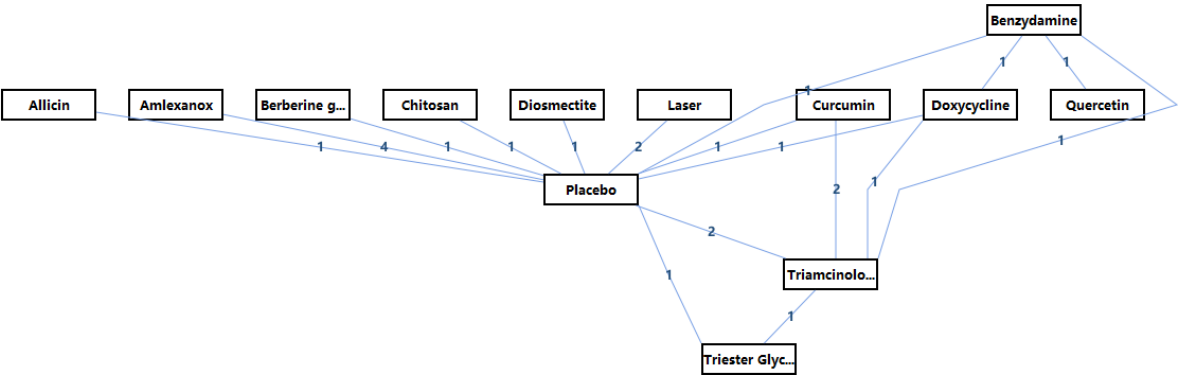

Day 5

1. Consistency Model

1.1 Summary estimates

|                        |                        |                        |                        |                        |                        |                        |
|------------------------|------------------------|------------------------|------------------------|------------------------|------------------------|------------------------|
| Alice                  | 1305 (-64.92, 88.43)   | -1656 (-106.20, 67.88) | 2120 (-88.41, 131.48)  | 927 (-66.32, 84.95)    | 615 (-77.48, 81.28)    | -1885 (-86.31, 50.32)  |
|                        | Amlexanox              |                        |                        |                        |                        |                        |
| -1305 (-88.43, 64.92)  |                        | -2884 (-102.36, 38.42) | 921 (-68.07, 87.94)    | -372 (-66.13, 49.81)   | -639 (-67.85, 45.74)   | -3202 (-74.58, 14.28)  |
| 1656 (-67.88, 106.20)  | 2884 (-38.42, 102.36)  | Curcumin               | 3825 (-64.60, 148.31)  | 2491 (-47.08, 103.01)  | 2193 (-53.63, 95.21)   | -251 (-67.22, 70.56)   |
| -2120 (-131.48, 88.41) | -921 (-67.94, 68.07)   |                        | Diosmetinone           | -1304 (-107.16, 79.97) | -1579 (-116.22, 75.37) | -4105 (-130.22, 49.79) |
| -927 (-84.95, 66.32)   | 372 (-49.81, 56.13)    | -2491 (-103.01, 47.08) | 1304 (-79.97, 107.16)  | Glycyrrhiza            | -280 (-61.98, 48.35)   | -2779 (-64.32, 10.89)  |
| -615 (-81.28, 77.48)   | 639 (-45.74, 67.85)    | -2193 (-95.21, 53.63)  | 1579 (-75.37, 116.22)  | 280 (-48.35, 61.98)    | Laser                  | -2496 (-70.08, 29.55)  |
| 1885 (-50.32, 86.31)   | 3202 (-14.28, 74.58)   | 251 (-70.56, 67.22)    | 4105 (-49.79, 130.22)  | 2779 (-10.89, 64.32)   | 2496 (-29.55, 70.08)   | Placebo                |
| -345 (-81.59, 75.66)   | 937 (-51.75, 67.45)    | -1998 (-96.65, 51.45)  | 1916 (-80.36, 115.57)  | 547 (-52.12, 62.40)    | 257 (-66.53, 62.89)    | -2230 (-67.26, 22.82)  |
| -1427 (-81.83, 53.69)  | -143 (-51.32, 48.83)   | -3097 (-84.24, 17.80)  | 769 (-84.67, 99.72)    | -543 (-61.89, 48.05)   | -840 (-67.32, 43.48)   | -3373 (-76.79, 11.82)  |
| -2417 (-129.59, 80.23) | -1157 (-104.64, 77.37) | -4097 (-150.51, 58.46) | -238 (-125.11, 117.78) | -1521 (-103.74, 69.05) | -1853 (-116.88, 67.67) | -4336 (-120.28, 33.67) |

|                         |                         |                        |
|-------------------------|-------------------------|------------------------|
| 3.45 (-75.66, 81.59)    | 14.27 (-53.69, 81.83)   | 2417 (-80.23, 129.59)  |
| -9.37 (-67.45, 51.75)   | 1.43 (-48.83, 51.32)    | 1157 (-77.37, 104.64)  |
| 19.98 (-51.45, 96.65)   | 30.97 (-17.80, 94.24)   | 4097 (-58.46, 150.51)  |
| -19.16 (-115.57, 80.36) | -7.69 (-99.72, 84.67)   | 2.38 (-117.78, 125.11) |
| -5.47 (-62.40, 52.12)   | 5.43 (-48.05, 61.89)    | 15.21 (-69.05, 103.74) |
| -2.57 (-62.69, 66.53)   | 8.40 (-43.48, 67.32)    | 18.53 (-67.67, 116.88) |
| 22.30 (-22.82, 67.26)   | 33.73 (-11.82, 76.79)   | 43.36 (-33.67, 120.28) |
| Probiotics              | 11.33 (-42.80, 65.10)   | 2111 (-69.51, 112.74)  |
| -11.33 (-65.10, 42.80)  | Triamcinolone           | 1007 (-78.37, 102.61)  |
| -21.11 (-112.74, 69.51) | -10.07 (-102.61, 78.37) | Zinc                   |

## 1.2 Rank probability(Rank 1 is best, rank N is worst)

| Drug          | Rank 1 | Rank 2 | Rank 3 | Rank 4 | Rank 5 | Rank 6 | Rank 7 | Rank 8 | Rank 9 | Rank 10 |
|---------------|--------|--------|--------|--------|--------|--------|--------|--------|--------|---------|
| Aloe          | 0.08   | 0.09   | 0.08   | 0.08   | 0.09   | 0.09   | 0.11   | 0.12   | 0.13   | 0.13    |
| Amlexanox     | 0.04   | 0.14   | 0.17   | 0.17   | 0.16   | 0.13   | 0.1    | 0.06   | 0.03   | 0.01    |
| Curcumin      | 0.02   | 0.03   | 0.04   | 0.05   | 0.06   | 0.08   | 0.1    | 0.12   | 0.17   | 0.33    |
| Dexamethasone | 0.31   | 0.15   | 0.09   | 0.07   | 0.06   | 0.06   | 0.06   | 0.06   | 0.06   | 0.09    |
| Glycyrrhiza   | 0.05   | 0.11   | 0.13   | 0.14   | 0.14   | 0.15   | 0.12   | 0.09   | 0.05   | 0.01    |
| Laser         | 0.06   | 0.1    | 0.11   | 0.12   | 0.12   | 0.13   | 0.12   | 0.11   | 0.08   | 0.05    |
| Placebo       | 0      | 0      | 0      | 0.01   | 0.03   | 0.06   | 0.11   | 0.21   | 0.31   | 0.27    |
| Probiotics    | 0.04   | 0.08   | 0.1    | 0.11   | 0.12   | 0.13   | 0.14   | 0.13   | 0.09   | 0.05    |
| Triamcinolone | 0.07   | 0.15   | 0.18   | 0.17   | 0.16   | 0.12   | 0.08   | 0.04   | 0.02   | 0       |
| Zinc          | 0.33   | 0.15   | 0.09   | 0.07   | 0.06   | 0.06   | 0.06   | 0.06   | 0.05   | 0.06    |

## 1.3 Consistency check

| Parameter                         | Median (95% CI)      |
|-----------------------------------|----------------------|
| Random Effects Standard Deviation | 33.43 (19.44, 62.54) |

## 1.4 Convergence Diagnostics

| Parameter                 | PSRF |                                                                                                                                                                              |
|---------------------------|------|------------------------------------------------------------------------------------------------------------------------------------------------------------------------------|
| d.Amlexanox.Dexamethasone | 1.00 | Number of chains : 4<br>Tuning iterations : 20,000<br>Simulation iterations : 50,000<br>Thinning interval : 10<br>Inference samples : 10,000<br>Variance scaling factor: 2.5 |
| d.Placebo.Aloe            | 1.00 |                                                                                                                                                                              |
| d.Placebo.Amlexanox       | 1.00 |                                                                                                                                                                              |
| d.Placebo.Glycyrrhiza     | 1.00 |                                                                                                                                                                              |
| d.Placebo.Laser           | 1.00 |                                                                                                                                                                              |
| d.Placebo.Probiotics      | 1.00 |                                                                                                                                                                              |
| d.Placebo.Triamcinolone   | 1.00 |                                                                                                                                                                              |
| d.Placebo.Zinc            | 1.00 |                                                                                                                                                                              |
| d.Triamcinolone.Curcumin  | 1.00 |                                                                                                                                                                              |
| sd.d                      | 1.00 |                                                                                                                                                                              |



2.Inconsistency Model

2.1 Summary estimates

|                         |                         |                         |                          |                         |                         |                         |                        |                         |                         |
|-------------------------|-------------------------|-------------------------|--------------------------|-------------------------|-------------------------|-------------------------|------------------------|-------------------------|-------------------------|
| Abe                     | 3.32 (-75.78, 83.10)    | -16.74 (-110.99, 70.28) | 12.36 (-93.42, 118.62)   | -13.83 (-101.68, 71.89) | -2.37 (-88.08, 76.10)   | -18.45 (-83.23, 46.43)  | 13.89 (-76.28, 103.91) | 14.63 (-49.73, 78.69)   | 24.30 (-73.32, 118.91)  |
| -3.32 (-83.10, 75.78)   | Ambulance               | -21.39 (-100.44, 54.75) | 9.10 (-61.95, 81.08)     | -17.91 (-70.75, 38.25)  | -5.58 (-63.69, 45.34)   | -22.45 (-69.31, 29.32)  | 9.36 (-65.45, 90.23)   | 7.35 (-47.31, 62.73)    | 21.37 (-66.40, 109.00)  |
| 16.74 (-70.28, 110.99)  | 21.39 (-54.75, 100.44)  | Cicumun                 | 29.82 (-72.10, 138.02)   | 3.30 (-79.96, 91.75)    | 14.35 (-59.68, 89.67)   | -1.53 (-73.42, 75.08)   | 31.04 (-42.77, 109.29) | 29.64 (-15.53, 80.58)   | 41.42 (-60.57, 146.89)  |
| -12.36 (-118.62, 93.42) | -9.10 (-81.08, 61.95)   | -29.82 (-138.02, 72.10) | Deemethacone             | -27.22 (-115.64, 65.04) | -14.61 (-109.66, 72.74) | -30.77 (-118.32, 57.33) | 1.36 (-104.75, 106.46) | 0.06 (-93.20, 93.44)    | 12.84 (-100.78, 122.83) |
| 13.83 (-71.89, 101.68)  | 17.91 (-38.25, 70.75)   | -3.30 (-91.75, 79.96)   | 27.22 (-65.04, 115.64)   | Glycyrrhiza             | 12.31 (-53.09, 64.89)   | -32.68 (-65.45, 3.49)   | 26.17 (-42.56, 96.38)  | 26.17 (-42.56, 96.38)   | 38.66 (-54.81, 131.27)  |
| 2.37 (-76.10, 88.08)    | 5.56 (-45.34, 63.69)    | -14.35 (-89.67, 59.68)  | 14.61 (-72.74, 109.66)   | -12.31 (-64.89, 53.09)  | Laser                   | 4.41 (-63.29, 96.57)    | 16.34 (-56.80, 96.15)  | 15.14 (-39.34, 75.07)   | 26.82 (-61.57, 121.17)  |
| 18.45 (-46.43, 83.23)   | 22.45 (-29.32, 69.31)   | 1.53 (-75.08, 73.42)    | 30.77 (-57.33, 118.32)   | 32.68 (-3.49, 69.45)    | -4.41 (-96.57, 63.29)   | Piacebo                 | 16.77 (-26.67, 63.72)  | 29.87 (-72.72, 132.38)  | 43.03 (-28.15, 115.81)  |
| -13.89 (-103.91, 76.28) | -9.36 (-90.23, 65.45)   | -31.04 (-109.29, 42.77) | -1.36 (-106.46, 104.75)  | -26.90 (-116.96, 54.85) | -16.34 (-96.15, 56.80)  | -16.77 (-63.72, 26.67)  | Probiotics             | -1.84 (-61.20, 58.73)   | 9.78 (-89.72, 109.72)   |
| -14.63 (-78.68, 49.73)  | -7.35 (-62.73, 47.31)   | -29.64 (-80.58, 15.53)  | -0.06 (-93.44, 93.20)    | -26.17 (-96.38, 42.56)  | -15.14 (-75.07, 39.34)  | -29.87 (-132.38, 72.72) | 1.84 (-58.73, 61.20)   | Triamcinolone           | 10.95 (-79.04, 103.77)  |
| -24.30 (-118.91, 73.32) | -21.37 (-109.00, 66.40) | -41.42 (-146.89, 60.57) | -12.84 (-122.83, 100.78) | -38.66 (-131.27, 54.81) | -26.82 (-121.17, 61.57) | -43.03 (-115.81, 28.15) | -9.78 (-109.72, 89.72) | -10.95 (-103.77, 79.04) | Zinc                    |

## 2.2 Inconsistency Factors

| Cycle                                                | Median (95% CI)        |
|------------------------------------------------------|------------------------|
| Amlexanox, Glycyrrhiza, Placebo                      | -24.97 (-88.02, 19.55) |
| Amlexanox, Laser, Placebo                            | 15.95 (-36.44, 110.28) |
| Amlexanox, Laser, Triamcinolone                      | 0.54 (-55.45, 64.80)   |
| Amlexanox, Laser, Placebo, Triamcinolone             | 1.13 (-55.54, 61.19)   |
| Amlexanox, Laser, Placebo, Probiotics, Triamcinolone | 10.65 (-42.90, 89.06)  |

## 2.3 Variance Calculation

| Parameter                         | Median (95% CI)      |
|-----------------------------------|----------------------|
| Random Effects Standard Deviation | 30.03 (14.97, 59.34) |
| Inconsistency Standard Deviation  | 34.85 (3.35, 87.39)  |

## 2.4 Convergence Diagnostics

| Parameter                         | PSRF |                                                                                                                                                                              |
|-----------------------------------|------|------------------------------------------------------------------------------------------------------------------------------------------------------------------------------|
| d.Aloe.Placebo                    | 1.00 | Number of chains : 4<br>Tuning iterations : 20,000<br>Simulation iterations : 50,000<br>Thinning interval : 10<br>Inference samples : 10,000<br>Variance scaling factor: 2.5 |
| d.Amlexanox.Dexamethasone         | 1.00 |                                                                                                                                                                              |
| d.Amlexanox.Glycyrrhiza           | 1.00 |                                                                                                                                                                              |
| d.Glycyrrhiza.Laser               | 1.00 |                                                                                                                                                                              |
| d.Laser.Triamcinolone             | 1.00 |                                                                                                                                                                              |
| d.Placebo.Amlexanox               | 1.00 |                                                                                                                                                                              |
| d.Placebo.Zinc                    | 1.00 |                                                                                                                                                                              |
| d.Triamcinolone.Curcumin          | 1.00 |                                                                                                                                                                              |
| d.Triamcinolone.Probiotics        | 1.00 |                                                                                                                                                                              |
| w.Amlexanox.Glycyrrhiza.Placebo   | 1.00 |                                                                                                                                                                              |
| w.Amlexanox.Laser.Placebo         | 1.00 |                                                                                                                                                                              |
| w.Amlexanox.Laser.Triamcinolone   | 1.00 |                                                                                                                                                                              |
| w.Amlexanox.Laser.Triamcinolon... | 1.00 |                                                                                                                                                                              |
| w.Amlexanox.Laser.Triamcinolon... | 1.00 |                                                                                                                                                                              |
| sd.d                              | 1.00 |                                                                                                                                                                              |
| sd.w                              | 1.00 |                                                                                                                                                                              |

## 3. Node-splitting analysis

| Name                      | Direct Effect          | Indirect Effect         | Overall                | P-Value |
|---------------------------|------------------------|-------------------------|------------------------|---------|
| Amlexanox, Glycyrrhiza    | -14.55 (-96.93, 66.57) | -1.23 (-69.58, 69.12)   | -3.72 (-56.13, 49.81)  | 0.79    |
| Amlexanox, Laser          | 10.24 (-59.68, 77.49)  | -56.43 (-132.79, 18.07) | -6.39 (-67.85, 45.74)  | 0.17    |
| Amlexanox, Placebo        | -44.02 (-98.67, 9.64)  | -16.18 (-76.22, 48.61)  | -32.02 (-74.58, 14.28) | 0.46    |
| Amlexanox, Triamcinolone  | 8.69 (-74.93, 91.39)   | -4.71 (-81.18, 69.16)   | 1.43 (-48.83, 51.32)   | 0.79    |
| Glycyrrhiza, Laser        | 22.52 (-45.28, 91.87)  | -53.33 (-132.35, 21.65) | -2.80 (-61.98, 48.35)  | 0.12    |
| Laser, Placebo            | -39.77 (-98.34, 36.30) | -24.69 (-87.00, 42.32)  | -24.96 (-70.08, 29.55) | 0.71    |
| Laser, Triamcinolone      | 29.34 (-55.66, 115.59) | -5.56 (-74.37, 75.58)   | 8.40 (-43.48, 67.32)   | 0.52    |
| Placebo, Probiotics       | 10.55 (-43.57, 65.00)  | 60.79 (-36.75, 151.55)  | 22.30 (-22.82, 67.26)  | 0.32    |
| Placebo, Triamcinolone    | 35.39 (-47.22, 117.45) | 31.70 (-30.73, 91.02)   | 33.73 (-11.82, 76.79)  | 0.93    |
| Probiotics, Triamcinolone | -16.45 (-96.23, 63.34) | 32.79 (-41.72, 105.53)  | 11.33 (-42.80, 65.10)  | 0.32    |

4. Network structure

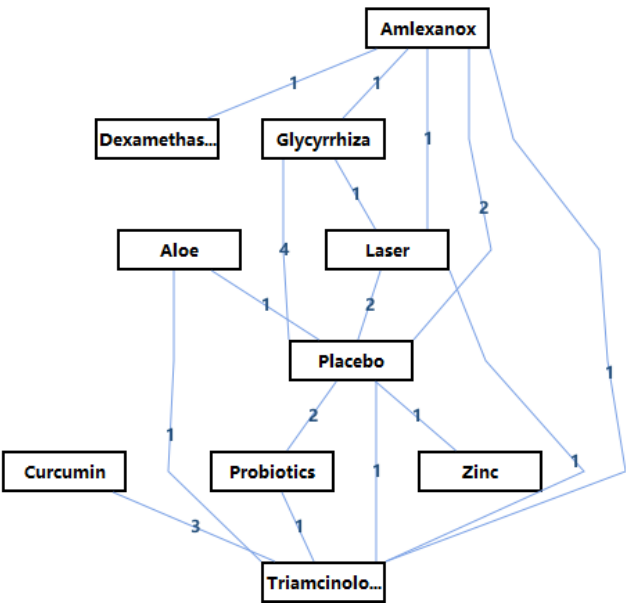

Day 6

1. Consistency Model

1.1 Summary estimates

|                          |                          |                         |                          |                          |                          |                          |
|--------------------------|--------------------------|-------------------------|--------------------------|--------------------------|--------------------------|--------------------------|
| Alien                    | 10.62 (-115.02, 141.93)  | 27.47 (-78.94, 133.87)  | -1.06 (-127.34, 128.88)  | 16.04 (-123.64, 156.62)  | -76.58 (-226.85, 75.07)  | 7.24 (-124.72, 134.20)   |
| -10.62 (-141.93, 115.02) | Aloe                     | 17.33 (-92.79, 122.57)  | -12.28 (-142.02, 119.28) | 5.97 (-134.45, 146.99)   | -87.96 (-240.46, 67.43)  | -3.31 (-137.94, 126.47)  |
| -27.47 (-133.87, 78.94)  | -17.33 (-122.57, 92.79)  | Amlexanox               | -28.99 (-133.51, 76.27)  | -11.59 (-129.64, 105.09) | -104.27 (-232.08, 25.46) | -20.26 (-126.51, 84.91)  |
| 1.06 (-128.88, 127.34)   | 12.28 (-119.28, 142.02)  | 28.99 (-76.27, 133.51)  | Berberine ginseng        | 16.98 (-121.13, 158.36)  | -75.47 (-224.60, 77.28)  | 8.31 (-121.30, 133.73)   |
| -16.04 (-156.62, 123.64) | -5.97 (-146.99, 134.45)  | 11.59 (-105.09, 129.64) | -16.98 (-158.36, 121.13) | Citric acid              | -93.20 (-251.02, 70.67)  | -8.81 (-150.16, 128.52)  |
| 76.58 (-75.07, 226.85)   | 87.96 (-67.43, 240.46)   | 104.27 (-25.46, 232.08) | 75.47 (-77.28, 224.60)   | 93.20 (-70.67, 251.02)   | Curcumin                 | 83.96 (-67.54, 230.58)   |
| -7.24 (-134.20, 124.72)  | 3.31 (-126.47, 137.94)   | 20.26 (-84.91, 126.51)  | -8.31 (-133.73, 121.30)  | 8.81 (-128.52, 150.16)   | -83.96 (-230.58, 67.54)  | Dexamethasone            |
| 2.37 (-128.74, 129.38)   | 12.45 (-116.69, 141.42)  | 29.28 (-79.34, 132.96)  | 0.33 (-131.43, 130.79)   | 18.13 (-123.93, 156.45)  | -75.10 (-228.50, 77.44)  | 8.05 (-122.98, 138.77)   |
| -27.89 (-159.12, 104.53) | -17.56 (-146.96, 119.53) | -0.37 (-111.21, 112.61) | -29.80 (-159.05, 103.90) | -12.46 (-155.02, 133.16) | -104.20 (-284.35, 51.04) | -21.47 (-155.41, 116.26) |
| 17.28 (-74.19, 106.72)   | 27.55 (-63.95, 120.59)   | 44.22 (-9.12, 97.63)    | 15.79 (-73.73, 105.29)   | 32.72 (-74.19, 136.88)   | -59.55 (-177.74, 61.18)  | 23.83 (-67.01, 115.54)   |
| -1.74 (-114.62, 105.10)  | 8.58 (-108.35, 122.61)   | 25.41 (-58.39, 107.82)  | -3.05 (-114.99, 107.60)  | 14.16 (-110.94, 137.64)  | -78.53 (-177.30, 20.89)  | 4.52 (-110.37, 117.64)   |
| -2.17 (-125.08, 120.70)  | 7.56 (-115.17, 136.08)   | 24.95 (-76.76, 125.24)  | -3.61 (-128.51, 121.82)  | 14.28 (-122.55, 148.81)  | -79.47 (-206.41, 53.41)  | 4.87 (-122.34, 126.05)   |

|                          |                         |                         |                          |                          |
|--------------------------|-------------------------|-------------------------|--------------------------|--------------------------|
| -2.37 (-129.38, 128.74)  | 27.89 (-104.53, 159.12) | -17.28 (-106.72, 74.19) | 1.74 (-105.10, 114.62)   | 2.17 (-120.70, 125.08)   |
| -12.45 (-141.42, 116.69) | 17.56 (-119.53, 146.96) | -27.55 (-120.59, 63.95) | -8.58 (-122.81, 108.35)  | -7.56 (-136.08, 115.17)  |
| -29.28 (-132.96, 79.34)  | 0.37 (-112.61, 111.21)  | -44.22 (-97.63, 9.12)   | -25.41 (-107.82, 58.39)  | -24.95 (-125.24, 76.76)  |
| -0.33 (-130.79, 131.43)  | 29.80 (-103.90, 159.05) | -15.79 (-105.29, 73.73) | 3.05 (-107.60, 114.99)   | 3.61 (-121.62, 128.51)   |
| -18.13 (-156.45, 123.93) | 12.46 (-133.16, 155.02) | -32.72 (-136.98, 74.19) | -14.16 (-137.64, 110.94) | -14.26 (-148.81, 122.55) |
| 75.10 (-77.44, 228.50)   | 104.20 (-51.04, 254.35) | 59.55 (-61.18, 177.74)  | 78.53 (-20.89, 177.30)   | 79.47 (-53.41, 206.41)   |
| -8.05 (-138.77, 122.98)  | 21.47 (-116.26, 155.41) | -23.83 (-115.54, 67.01) | -4.52 (-117.64, 110.37)  | -4.87 (-126.05, 122.34)  |
| Diosmectite              | 30.09 (-106.17, 161.28) | -15.12 (-108.35, 76.35) | 3.98 (-111.06, 115.98)   | 4.51 (-125.14, 128.72)   |
| -30.09 (-161.28, 106.17) | Laser                   | -45.27 (-139.60, 55.49) | -26.39 (-140.75, 93.45)  | -25.62 (-151.09, 105.28) |
| 15.12 (-76.35, 108.35)   | 45.27 (-55.49, 139.60)  | Placebo                 | 18.87 (-46.25, 86.53)    | 19.47 (-64.48, 103.92)   |
| -3.98 (-115.58, 111.06)  | 26.39 (-93.45, 140.75)  | -18.87 (-86.53, 46.25)  | Triamcinolone            | 0.91 (-85.34, 85.89)     |
| -4.51 (-128.72, 125.14)  | 25.62 (-105.28, 151.09) | -19.47 (-103.92, 64.48) | -0.91 (-85.89, 85.34)    | Triester Glycerol Oxide  |

### 1.2 Rank probability(Rank 1 is best, rank N is worst)

| Drug                    | Rank 1 | Rank 2 | Rank 3 | Rank 4 | Rank 5 | Rank 6 | Rank 7 | Rank 8 | Rank 9 | Rank 10 | Rank 11 | Rank 12 |
|-------------------------|--------|--------|--------|--------|--------|--------|--------|--------|--------|---------|---------|---------|
| Allicin                 | 0.06   | 0.07   | 0.08   | 0.08   | 0.09   | 0.1    | 0.09   | 0.08   | 0.09   | 0.09    | 0.11    | 0.05    |
| Aloe                    | 0.1    | 0.11   | 0.11   | 0.1    | 0.1    | 0.09   | 0.08   | 0.08   | 0.06   | 0.06    | 0.07    | 0.03    |
| Amlexanox               | 0.12   | 0.19   | 0.18   | 0.16   | 0.12   | 0.09   | 0.06   | 0.03   | 0.02   | 0.01    | 0.01    | 0       |
| Berberine gelatin       | 0.06   | 0.07   | 0.08   | 0.09   | 0.09   | 0.09   | 0.09   | 0.09   | 0.09   | 0.1     | 0.11    | 0.05    |
| Chitosan                | 0.19   | 0.11   | 0.09   | 0.08   | 0.07   | 0.07   | 0.06   | 0.06   | 0.05   | 0.07    | 0.09    | 0.05    |
| Curcumin                | 0.01   | 0.01   | 0.01   | 0.01   | 0.02   | 0.02   | 0.02   | 0.03   | 0.03   | 0.06    | 0.12    | 0.67    |
| Dexamethasone           | 0.09   | 0.1    | 0.1    | 0.1    | 0.1    | 0.09   | 0.08   | 0.08   | 0.08   | 0.08    | 0.08    | 0.04    |
| Diosmectite             | 0.06   | 0.07   | 0.07   | 0.08   | 0.09   | 0.09   | 0.09   | 0.09   | 0.09   | 0.1     | 0.12    | 0.05    |
| Laser                   | 0.24   | 0.15   | 0.12   | 0.09   | 0.08   | 0.07   | 0.06   | 0.05   | 0.04   | 0.04    | 0.04    | 0.02    |
| Placebo                 | 0      | 0      | 0      | 0      | 0.02   | 0.06   | 0.12   | 0.2    | 0.26   | 0.21    | 0.11    | 0.01    |
| Triamcinolone           | 0.02   | 0.05   | 0.08   | 0.11   | 0.12   | 0.13   | 0.13   | 0.11   | 0.1    | 0.09    | 0.05    | 0       |
| Triester Glycerol Oxide | 0.05   | 0.07   | 0.08   | 0.1    | 0.1    | 0.11   | 0.1    | 0.1    | 0.09   | 0.09    | 0.09    | 0.03    |

### 1.3 Consistency check

|                                   |                      |
|-----------------------------------|----------------------|
| Parameter                         | Median (95% CI)      |
| Random Effects Standard Deviation | 37.38 (15.59, 76.19) |

1.4 Convergence Diagnostics

| Parameter                       | PSRF |  |
|---------------------------------|------|--|
| d.Placebo.Allicin               | 1.00 |  |
| d.Placebo.Aloe                  | 1.00 |  |
| d.Placebo.Amlexanox             | 1.00 |  |
| d.Placebo.Berberinegelatin      | 1.00 |  |
| d.Placebo.Chitosan              | 1.00 |  |
| d.Placebo.Dexamethasone         | 1.00 |  |
| d.Placebo.Diosmectite           | 1.00 |  |
| d.Placebo.Laser                 | 1.00 |  |
| d.Placebo.Triamcinolone         | 1.00 |  |
| d.Placebo.TriesterGlycerolOxide | 1.00 |  |
| d.Triamcinolone.Curcumin        | 1.00 |  |
| sd.d                            | 1.00 |  |

Number of chains : 4

Tuning iterations : 20,000

Simulation iterations : 50,000

Thinning interval : 10

Inference samples : 10,000

Variance scaling factor: 2.5

2.Inconsistency Model

2.1 Summary estimates

|                          |                          |                         |                          |                          |                          |                          |                          |
|--------------------------|--------------------------|-------------------------|--------------------------|--------------------------|--------------------------|--------------------------|--------------------------|
| Allicin                  | 11.02 (-116.41, 138.17)  | 26.38 (-81.98, 133.32)  | -0.79 (-131.28, 129.26)  | 14.32 (-129.90, 156.87)  | -77.66 (-228.47, 80.35)  | 6.76 (-124.28, 137.60)   | -2.32 (-134.97, 128.16)  |
| -11.02 (-138.17, 116.41) | Aloe                     | 15.64 (-92.45, 118.23)  | -13.02 (-140.21, 119.51) | 4.33 (-134.66, 145.28)   | -88.94 (-236.22, 64.72)  | -3.98 (-133.20, 125.94)  | -13.14 (-142.28, 115.91) |
| -26.38 (-133.32, 81.98)  | -15.64 (-118.23, 92.45)  | Amlexanox               | -28.21 (-131.32, 79.57)  | -11.61 (-128.42, 111.64) | -104.26 (-232.83, 35.63) | -19.35 (-125.36, 89.58)  | -29.13 (-132.43, 78.73)  |
| 0.79 (-129.26, 131.28)   | 13.02 (-119.51, 140.21)  | 28.21 (-79.57, 131.32)  | Berberine gelatin        | 15.94 (-123.28, 156.78)  | -76.58 (-223.88, 77.08)  | 7.64 (-122.35, 140.77)   | -0.99 (-130.73, 131.28)  |
| -14.32 (-156.87, 129.90) | -4.33 (-145.26, 134.66)  | 11.61 (-111.64, 128.42) | -15.94 (-156.78, 123.28) | Chitosan                 | -91.50 (-253.93, 71.75)  | -8.93 (-150.75, 131.94)  | -17.35 (-158.01, 123.59) |
| -77.66 (-80.35, 228.47)  | 88.94 (-64.72, 236.22)   | 104.26 (-35.63, 232.83) | 76.58 (-77.08, 223.88)   | 91.50 (-71.75, 233.93)   | Curcumin                 | 85.64 (-74.74, 236.95)   | 75.67 (-77.29, 223.91)   |
| -6.76 (-137.60, 124.28)  | 3.98 (-125.94, 133.20)   | 19.35 (-89.58, 125.36)  | -7.64 (-140.77, 122.35)  | 8.93 (-131.94, 150.75)   | -85.64 (-236.95, 74.74)  | Dexamethasone            | -9.06 (-139.83, 120.66)  |
| 2.32 (-128.16, 134.97)   | 13.14 (-115.91, 142.28)  | 29.13 (-78.73, 132.43)  | 0.99 (-131.28, 130.73)   | 17.35 (-123.59, 158.01)  | -75.67 (-223.91, 77.29)  | 9.06 (-120.66, 139.83)   | Diosmectite              |
| -27.16 (-165.93, 109.42) | -16.33 (-153.62, 115.27) | -0.49 (-114.89, 108.54) | -29.07 (-165.14, 107.03) | -12.50 (-156.59, 132.81) | -104.23 (-262.11, 52.96) | -20.49 (-158.08, 117.93) | -29.90 (-168.42, 104.95) |
| 17.52 (-75.60, 110.39)   | 28.60 (-63.60, 120.12)   | 44.26 (-12.35, 95.21)   | 16.02 (-73.85, 107.74)   | 32.91 (-73.57, 141.03)   | -59.66 (-176.85, 63.54)  | 24.42 (-67.05, 116.81)   | 15.42 (-76.81, 108.33)   |
| -1.07 (-117.50, 113.23)  | 9.60 (-101.39, 120.61)   | 25.36 (-61.67, 106.44)  | -2.35 (-113.55, 109.98)  | 13.77 (-112.56, 139.67)  | -78.85 (-179.98, 23.50)  | 5.47 (-112.01, 118.98)   | -3.66 (-119.12, 110.15)  |
| -1.41 (-130.92, 124.43)  | 9.48 (-115.20, 132.44)   | 25.13 (-78.83, 124.35)  | -3.17 (-129.49, 123.52)  | 13.17 (-126.36, 151.37)  | -78.80 (-212.87, 55.41)  | 5.12 (-122.42, 134.34)   | -4.08 (-133.47, 122.16)  |

|                         |                         |                          |                          |
|-------------------------|-------------------------|--------------------------|--------------------------|
| 27.16 (-109.42, 165.93) | -17.52 (-110.39, 75.60) | 1.07 (-113.23, 117.50)   | 1.41 (-124.43, 130.92)   |
| 16.33 (-115.27, 153.62) | -28.60 (-120.12, 63.60) | -9.60 (-120.61, 101.39)  | -9.48 (-132.44, 115.20)  |
| 0.49 (-108.54, 114.89)  | -44.26 (-95.21, 12.35)  | -25.36 (-106.44, 61.67)  | -25.13 (-124.35, 78.83)  |
| 29.07 (-107.03, 165.14) | -16.02 (-107.74, 73.85) | 2.35 (-109.98, 113.55)   | 3.17 (-123.52, 129.49)   |
| 12.50 (-132.81, 156.59) | -32.91 (-141.03, 73.57) | -13.77 (-139.67, 112.56) | -13.17 (-151.37, 126.36) |
| 104.23 (-52.96, 262.11) | 59.66 (-63.54, 176.85)  | 78.85 (-23.50, 179.98)   | 78.80 (-55.41, 212.67)   |
| 20.49 (-117.93, 159.08) | -24.42 (-116.81, 67.05) | -5.47 (-118.98, 112.01)  | -5.12 (-134.34, 122.42)  |
| 29.90 (-104.95, 168.42) | -15.42 (-108.33, 76.81) | 3.66 (-110.15, 119.12)   | 4.08 (-122.16, 133.47)   |
| Laser                   |                         |                          |                          |
| 45.02 (-53.44, 145.41)  | Placebo                 | 19.00 (-44.19, 85.78)    | 18.82 (-66.02, 107.07)   |
| 26.29 (-95.25, 144.49)  |                         | Triamcinolone            | 0.40 (-94.69, 85.99)     |
| 25.94 (-104.19, 156.16) | -18.82 (-107.07, 66.02) | -0.40 (-85.98, 84.69)    | Triester Glycerol Oxide  |

## 2.2 Variance Calculation

| Parameter                         | Median (95% CI)      |
|-----------------------------------|----------------------|
| Random Effects Standard Deviation | 37.78 (15.91, 76.37) |
| Inconsistency Standard Deviation  | 40.92 (1.92, 79.05)  |

## 2.4 Convergence Diagnostics

| Parameter                           | PSRF |                                                                                                                                                                              |
|-------------------------------------|------|------------------------------------------------------------------------------------------------------------------------------------------------------------------------------|
| d.Alicin.Placebo                    | 1.00 | Number of chains : 4<br>Tuning iterations : 20,000<br>Simulation iterations : 50,000<br>Thinning interval : 10<br>Inference samples : 10,000<br>Variance scaling factor: 2.5 |
| d.Placebo.Aloe                      | 1.00 |                                                                                                                                                                              |
| d.Placebo.Amlexanox                 | 1.00 |                                                                                                                                                                              |
| d.Placebo.Berberinegelatin          | 1.00 |                                                                                                                                                                              |
| d.Placebo.Chitosan                  | 1.00 |                                                                                                                                                                              |
| d.Placebo.Dexamethasone             | 1.00 |                                                                                                                                                                              |
| d.Placebo.Diosmectite               | 1.00 |                                                                                                                                                                              |
| d.Placebo.Laser                     | 1.00 |                                                                                                                                                                              |
| d.Placebo.Triamcinolone             | 1.00 |                                                                                                                                                                              |
| d.Triamcinolone.Curcumin            | 1.00 |                                                                                                                                                                              |
| d.Triamcinolone.TriesterGlycerol... | 1.00 |                                                                                                                                                                              |
| sd.d                                | 1.00 |                                                                                                                                                                              |
| sd.w                                | 1.00 |                                                                                                                                                                              |

## 3. Network structure

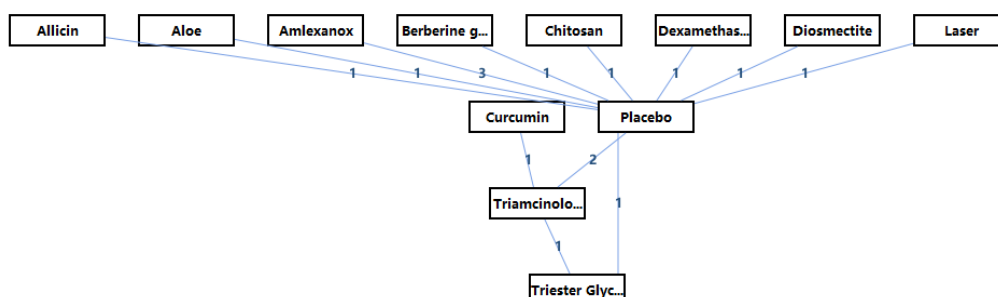

## Day 7

## 1. Consistency Model

### 1.1 Summary estimates

|                         |                        |                         |                         |                        |                        |                         |                         |                         |                         |                         |
|-------------------------|------------------------|-------------------------|-------------------------|------------------------|------------------------|-------------------------|-------------------------|-------------------------|-------------------------|-------------------------|
| Alice                   |                        | 22.98 (-72.30, 116.68)  | 7.61 (-67.80, 87.05)    | 17.51 (-32.36, 69.90)  | 30.72 (-41.26, 103.68) | 1.51 (-53.91, 54.32)    | -1.49 (-40.02, 38.76)   | 19.31 (-62.63, 98.64)   | 11.29 (-36.97, 57.19)   | 10.57 (-60.92, 82.67)   |
|                         | Anhlexox               |                         | -14.83 (-123.11, 94.37) | -5.20 (-99.55, 92.58)  | 7.85 (-52.11, 69.04)   | -21.04 (-115.09, 74.25) | -24.15 (-107.89, 62.93) | -3.80 (-118.51, 113.03) | -11.90 (-106.25, 83.03) | -12.90 (-116.33, 92.88) |
| -22.98 (-116.68, 72.30) |                        |                         | Cryohearp               |                        |                        |                         |                         |                         |                         |                         |
| -7.61 (-87.05, 67.80)   | 14.83 (-94.37, 123.11) |                         |                         | 9.45 (-67.42, 86.54)   | 22.95 (-69.11, 113.10) | -6.19 (-83.99, 69.68)   | -8.97 (-74.43, 57.58)   | 11.29 (-89.63, 111.97)  | 3.13 (-73.53, 78.31)    | 2.09 (-85.42, 90.44)    |
| -17.51 (-69.90, 32.36)  | 5.20 (-92.58, 99.55)   | -9.45 (-86.54, 67.42)   |                         | Curcumin               |                        |                         |                         |                         |                         |                         |
| -30.72 (-103.68, 41.26) | -7.85 (-69.04, 52.11)  | -22.95 (-113.10, 69.11) | -13.29 (-84.05, 62.43)  |                        | Dexamethasone          |                         |                         |                         |                         |                         |
|                         |                        |                         |                         |                        |                        |                         |                         |                         |                         |                         |
| -1.51 (-54.32, 53.91)   | 21.04 (-74.25, 115.09) | 6.19 (-69.68, 83.99)    | 15.82 (-32.76, 68.40)   | 29.81 (-44.40, 102.89) |                        | Liver                   | -2.75 (-42.46, 39.73)   | 17.52 (-62.75, 98.25)   | 9.18 (-36.24, 56.85)    | 8.54 (-61.04, 82.65)    |
| 1.49 (-38.76, 40.02)    | 24.15 (-62.93, 107.89) | 8.97 (-57.58, 74.43)    | 18.81 (-22.56, 58.53)   | 31.99 (-30.21, 91.88)  | 2.75 (-39.73, 42.46)   |                         | Pancreo                 | 20.48 (-57.48, 95.11)   | 12.40 (-27.35, 48.50)   | 11.27 (-48.66, 71.68)   |
|                         |                        |                         |                         |                        |                        |                         |                         |                         |                         |                         |
| -19.31 (-98.64, 62.63)  | 3.80 (-113.03, 118.51) | -11.29 (-111.97, 89.63) | -1.58 (-73.91, 70.79)   | 12.12 (-86.68, 108.89) | -17.52 (-98.25, 62.75) |                         |                         | Probiotics              | -8.36 (-72.45, 57.30)   | -9.85 (-103.78, 90.18)  |
| -11.29 (-57.19, 36.97)  | 11.90 (-83.03, 106.25) | -3.13 (-78.31, 73.53)   | 6.45 (-23.82, 38.17)    | 19.79 (-53.26, 92.09)  | -9.18 (-56.65, 36.24)  |                         | -12.40 (-48.50, 27.35)  | 8.36 (-57.30, 72.45)    |                         |                         |
|                         |                        |                         |                         |                        |                        |                         |                         |                         |                         |                         |
| -10.57 (-82.67, 60.92)  | 12.90 (-92.88, 116.33) | -2.09 (-90.44, 85.42)   | 7.93 (-67.69, 79.71)    | 20.93 (-65.72, 105.32) | -8.54 (-82.65, 61.04)  |                         | -11.27 (-71.68, 48.66)  | 9.85 (-90.18, 103.78)   | 1.55 (-72.37, 71.30)    | Zinc                    |

## 1.2 Rank probability(Rank 1 is best, rank N is worst)

| Drug          | Rank 1 | Rank 2 | Rank 3 | Rank 4 | Rank 5 | Rank 6 | Rank 7 | Rank 8 | Rank 9 | Rank 10 |
|---------------|--------|--------|--------|--------|--------|--------|--------|--------|--------|---------|
| Aloe          | 0.02   | 0.03   | 0.05   | 0.08   | 0.1    | 0.12   | 0.13   | 0.14   | 0.17   | 0.15    |
| Amlexanox     | 0.22   | 0.18   | 0.11   | 0.08   | 0.06   | 0.05   | 0.05   | 0.06   | 0.07   | 0.14    |
| Cryotherapy   | 0.12   | 0.09   | 0.1    | 0.09   | 0.07   | 0.07   | 0.08   | 0.08   | 0.1    | 0.19    |
| Curcumin      | 0.07   | 0.12   | 0.17   | 0.17   | 0.16   | 0.11   | 0.08   | 0.05   | 0.04   | 0.02    |
| Dexamethasone | 0.22   | 0.26   | 0.14   | 0.09   | 0.07   | 0.06   | 0.04   | 0.04   | 0.05   | 0.02    |
| Laser         | 0.02   | 0.04   | 0.07   | 0.09   | 0.11   | 0.12   | 0.13   | 0.14   | 0.15   | 0.14    |
| Placebo       | 0      | 0      | 0.01   | 0.04   | 0.08   | 0.15   | 0.22   | 0.24   | 0.18   | 0.06    |
| Probiotics    | 0.22   | 0.12   | 0.12   | 0.09   | 0.07   | 0.06   | 0.06   | 0.06   | 0.08   | 0.13    |
| Triamcinolone | 0.02   | 0.06   | 0.11   | 0.16   | 0.18   | 0.16   | 0.13   | 0.1    | 0.06   | 0.02    |
| Zinc          | 0.1    | 0.09   | 0.11   | 0.11   | 0.09   | 0.08   | 0.08   | 0.08   | 0.11   | 0.14    |

## 1.3 Consistency check

| Parameter                         | Median (95% CI)      |
|-----------------------------------|----------------------|
| Random Effects Standard Deviation | 26.48 (14.59, 42.00) |

## 1.4 Convergence Diagnostics

| Parameter                  | PSRF |                                                                                                                                                                              |
|----------------------------|------|------------------------------------------------------------------------------------------------------------------------------------------------------------------------------|
| d.Dexamethasone.Amlexanox  | 1.00 | Number of chains : 4<br>Tuning iterations : 20,000<br>Simulation iterations : 50,000<br>Thinning interval : 10<br>Inference samples : 10,000<br>Variance scaling factor: 2.5 |
| d.Placebo.Aloe             | 1.00 |                                                                                                                                                                              |
| d.Placebo.Cryotherapy      | 1.00 |                                                                                                                                                                              |
| d.Placebo.Curcumin         | 1.00 |                                                                                                                                                                              |
| d.Placebo.Dexamethasone    | 1.00 |                                                                                                                                                                              |
| d.Placebo.Laser            | 1.00 |                                                                                                                                                                              |
| d.Placebo.Triamcinolone    | 1.00 |                                                                                                                                                                              |
| d.Placebo.Zinc             | 1.08 |                                                                                                                                                                              |
| d.Triamcinolone.Probiotics | 1.00 |                                                                                                                                                                              |
| sd.d                       | 1.00 |                                                                                                                                                                              |

## 2.Inconsistency Model

### 2.1 Summary estimates

|                         |                         |                         |                        |                        |
|-------------------------|-------------------------|-------------------------|------------------------|------------------------|
| Aloe                    | 33.62 (-71.30, 121.56)  | 19.16 (-62.12, 94.32)   | 25.93 (-27.75, 82.30)  | 42.01 (-36.59, 112.30) |
| -33.62 (-121.56, 71.30) | Amlexanox               | -13.90 (-111.30, 95.87) | -7.61 (-92.14, 99.05)  | 8.79 (-45.54, 70.54)   |
| -19.16 (-94.32, 62.12)  | 13.90 (-95.87, 111.30)  | Cryotherapy             | 6.54 (-65.95, 87.87)   | 22.95 (-65.80, 106.17) |
| -25.93 (-82.30, 27.75)  | 7.61 (-99.05, 92.14)    | -6.54 (-87.87, 65.95)   | Curcumin               | 16.20 (-61.83, 84.07)  |
| -42.01 (-112.30, 36.39) | -8.79 (-70.54, 45.54)   | -22.95 (-106.17, 65.80) | -16.20 (-84.07, 61.83) | Dexamethasone          |
| 4.33 (-58.48, 76.81)    | 37.87 (-62.50, 129.84)  | 23.46 (-57.34, 110.14)  | 29.10 (-22.76, 99.13)  | 45.46 (-30.81, 131.12) |
| -9.80 (-53.15, 38.22)   | 23.17 (-64.26, 102.43)  | 9.08 (-54.18, 73.81)    | 15.75 (-21.20, 61.04)  | 31.69 (-28.40, 90.43)  |
| -27.77 (-113.34, 54.29) | 5.55 (-122.60, 109.33)  | -8.91 (-114.44, 86.43)  | -2.27 (-72.44, 67.74)  | 14.03 (-89.97, 104.05) |
| -11.68 (-59.88, 33.13)  | 13.71 (-93.74, 99.95)   | -0.71 (-81.00, 72.53)   | 5.83 (-24.00, 36.04)   | 21.97 (-56.72, 89.39)  |
| -20.29 (-110.20, 56.75) | 15.54 (-120.92, 110.18) | -1.49 (-104.86, 84.59)  | 5.09 (-76.86, 76.53)   | 21.77 (-81.36, 103.23) |



|                         |                         |                         |                        |                          |
|-------------------------|-------------------------|-------------------------|------------------------|--------------------------|
| -4.33 (-76.81, 58.48)   | 9.80 (-89.22, 53.15)    | 27.77 (-54.29, 113.34)  | 11.68 (-331.3, 59.38)  | 20.29 (-56.75, 110.20)   |
| -37.87 (-129.94, 62.50) | -23.17 (-102.43, 64.26) | -5.55 (-109.33, 122.60) | -13.71 (-98.95, 93.74) | -15.54 (-110.18, 120.92) |
| -23.46 (-110.14, 57.34) | -9.08 (-73.81, 54.18)   | 8.91 (-86.43, 114.44)   | 0.71 (-72.53, 81.00)   | 1.49 (-84.59, 104.86)    |
| -29.10 (-99.13, 22.76)  | -15.75 (-61.04, 21.20)  | 2.27 (-67.74, 72.44)    | -5.83 (-36.04, 24.00)  | -5.09 (-76.53, 76.86)    |
| -45.46 (-131.12, 30.81) | -31.69 (-90.43, 28.40)  | -14.03 (-104.05, 88.97) | -21.97 (-89.39, 56.72) | -21.77 (-103.23, 81.36)  |
| Laser                   | 2.31 (-34.42, 51.17)    | 32.76 (-47.72, 124.01)  | 22.53 (-24.80, 90.69)  | 21.50 (-61.85, 142.39)   |
| -2.31 (-51.17, 34.42)   | Placebo                 | 18.04 (-53.35, 97.69)   | 28.55 (-17.58, 69.69)  | 8.90 (-49.65, 90.80)     |
| -32.76 (-124.01, 47.72) | -18.04 (-97.69, 53.35)  | Probiotics              | -8.36 (-71.91, 55.53)  | -7.36 (-103.84, 95.96)   |
| -22.53 (-90.69, 24.80)  | -28.55 (-69.69, 17.58)  | 8.36 (-55.53, 71.91)    | Triamcinolone          | 1.04 (-68.99, 79.48)     |
| -21.50 (-142.39, 61.85) | -8.90 (-90.80, 49.65)   | 7.36 (-95.96, 103.84)   | -1.04 (-79.48, 68.99)  | Zinc                     |

## 2.2 Inconsistency Factors

| Cycle                                   | Median (95% CI)       |
|-----------------------------------------|-----------------------|
| Aloe, Curcumin, Placebo, Triamcinolone  | 5.55 (-30.60, 51.07)  |
| Curcumin, Laser, Placebo, Triamcinolone | 6.31 (-29.65, 67.59)  |
| Curcumin, Placebo, Triamcinolone        | 14.09 (-19.30, 61.60) |

## 2.3 Variance Calculation

| Parameter                         | Median (95% CI)     |
|-----------------------------------|---------------------|
| Random Effects Standard Deviation | 24.40 (7.05, 41.92) |
| Inconsistency Standard Deviation  | 23.30 (1.93, 42.57) |

## 2.4 Convergence Diagnostics

| Parameter                         | PSRF |                                                                                                                                                                              |
|-----------------------------------|------|------------------------------------------------------------------------------------------------------------------------------------------------------------------------------|
| d.Aloe.Placebo                    | 1.01 | Number of chains : 4<br>Tuning iterations : 20,000<br>Simulation iterations : 50,000<br>Thinning interval : 10<br>Inference samples : 10,000<br>Variance scaling factor: 2.5 |
| d.Curcumin.Triamcinolone          | 1.01 |                                                                                                                                                                              |
| d.Dexamethasone.Amlexanox         | 1.19 |                                                                                                                                                                              |
| d.Placebo.Cryotherapy             | 1.00 |                                                                                                                                                                              |
| d.Placebo.Curcumin                | 1.06 |                                                                                                                                                                              |
| d.Placebo.Dexamethasone           | 1.00 |                                                                                                                                                                              |
| d.Placebo.Zinc                    | 1.68 |                                                                                                                                                                              |
| d.Triamcinolone.Laser             | 1.76 |                                                                                                                                                                              |
| d.Triamcinolone.Probiotics        | 1.00 |                                                                                                                                                                              |
| w.Aloe.Placebo.Curcumin.Triamc... | 1.01 |                                                                                                                                                                              |
| w.Curcumin.Placebo.Laser.Triam... | 1.12 |                                                                                                                                                                              |
| w.Curcumin.Placebo.Triamcinolo... | 1.01 |                                                                                                                                                                              |
| sd.d                              | 1.06 |                                                                                                                                                                              |
| sd.w                              | 1.01 |                                                                                                                                                                              |

### 3. Node-splitting analysis

| Name                    | Direct Effect          | Indirect Effect        | Overall                | P-Value |
|-------------------------|------------------------|------------------------|------------------------|---------|
| Aloe, Triamcinolone     | 10.03 (-46.07, 70.52)  | -9.03 (-74.33, 57.86)  | 11.29 (-36.97, 57.19)  | 0.61    |
| Curcumin, Placebo       | -2.09 (-60.34, 56.28)  | -35.17 (-91.21, 21.28) | -18.81 (-58.53, 22.56) | 0.37    |
| Curcumin, Triamcinolone | -11.53 (-47.40, 20.19) | 21.25 (-54.91, 92.39)  | -6.45 (-38.17, 23.82)  | 0.37    |
| Laser, Placebo          | -1.56 (-49.22, 50.99)  | -4.35 (-85.85, 79.11)  | -2.75 (-42.46, 39.73)  | 0.95    |
| Laser, Triamcinolone    | 7.43 (-63.13, 77.77)   | 11.55 (-52.61, 77.03)  | 9.18 (-36.24, 56.85)   | 0.94    |
| Placebo, Triamcinolone  | 39.96 (-19.36, 97.87)  | -2.85 (-56.38, 47.59)  | 12.40 (-27.35, 48.50)  | 0.24    |

### 4. Network structure

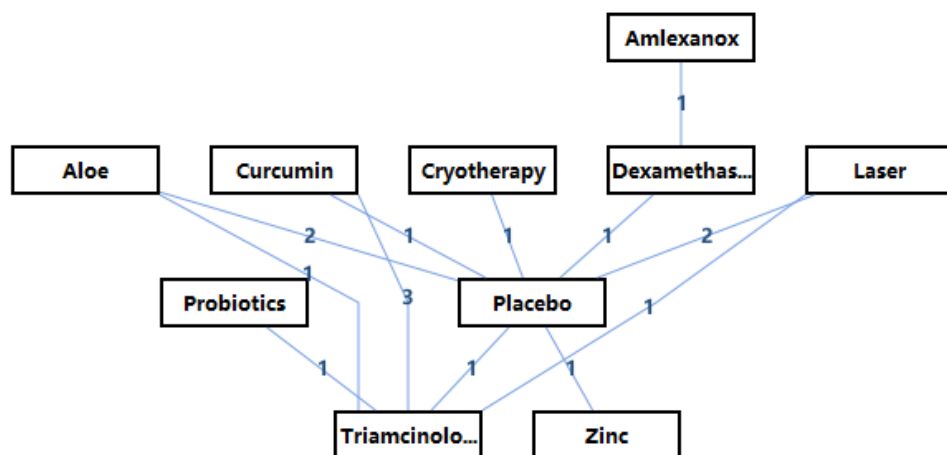

## Day 10

### 1. Consistency Model

#### 1.1 Summary estimates

|                        |                       |                        |                       |                       |                        |                        |                       |
|------------------------|-----------------------|------------------------|-----------------------|-----------------------|------------------------|------------------------|-----------------------|
| Aloe                   | 13.96 (-29.65, 55.90) | 3.25 (-36.87, 47.86)   | 12.45 (-36.52, 60.32) | 13.85 (-25.91, 53.36) | 0.00 (-26.04, 26.61)   | 1.69 (-51.49, 55.64)   | 13.79 (-25.69, 53.29) |
| -13.96 (-55.90, 29.65) | Benzydamine           | -9.56 (-50.22, 33.82)  | -2.12 (-43.76, 40.48) | -0.37 (-30.60, 32.31) | -13.98 (-47.18, 20.09) | -10.43 (-60.34, 38.18) | -0.57 (-30.48, 32.00) |
| -3.25 (-47.86, 36.87)  | 9.56 (-33.82, 50.22)  | Cryotherapy            | 8.31 (-40.40, 54.07)  | 10.44 (-29.11, 47.49) | -3.15 (-38.60, 26.33)  | -2.21 (-55.58, 50.46)  | 10.42 (-29.48, 47.90) |
| -12.45 (-60.32, 36.52) | 2.12 (-40.48, 43.76)  | -8.31 (-54.07, 40.40)  | Curcumin              | 1.42 (-34.98, 40.13)  | -12.39 (-52.12, 27.94) | -9.03 (-56.31, 35.82)  | 1.50 (-26.29, 29.96)  |
| -13.85 (-53.36, 25.91) | 0.37 (-32.31, 30.60)  | -10.44 (-47.49, 29.11) | -1.42 (-40.13, 34.98) | Doxycycline           | -13.86 (-42.66, 14.13) | -11.12 (-57.56, 32.92) | 0.03 (-26.40, 25.94)  |
| -0.00 (-26.61, 26.04)  | 13.98 (-20.09, 47.18) | 3.15 (-26.33, 38.60)   | 12.39 (-27.94, 52.12) | 13.86 (-14.13, 42.66) | Placebo                | 1.72 (-43.99, 50.06)   | 13.79 (-14.33, 42.93) |
| -1.69 (-55.64, 51.49)  | 10.43 (-38.18, 60.34) | 2.21 (-50.46, 55.58)   | 9.03 (-35.82, 56.31)  | 11.12 (-32.92, 57.56) | -1.72 (-50.06, 43.99)  | Probiotics             | 11.45 (-25.77, 49.21) |
| -13.79 (-53.29, 25.69) | 0.57 (-32.00, 30.48)  | -10.42 (-47.90, 29.48) | -1.50 (-29.96, 26.29) | -0.03 (-25.94, 26.40) | -13.79 (-42.93, 14.33) | -11.45 (-49.21, 25.77) | Triamcinolone         |

#### 1.2 Rank probability(Rank 1 is best, rank N is worst)

| Drug          | Rank 1 | Rank 2 | Rank 3 | Rank 4 | Rank 5 | Rank 6 | Rank 7 | Rank 8 |
|---------------|--------|--------|--------|--------|--------|--------|--------|--------|
| Aloe          | 0.05   | 0.05   | 0.06   | 0.07   | 0.11   | 0.17   | 0.25   | 0.25   |
| Benzydamine   | 0.28   | 0.16   | 0.12   | 0.14   | 0.12   | 0.09   | 0.06   | 0.05   |
| Cryotherapy   | 0.09   | 0.08   | 0.08   | 0.1    | 0.17   | 0.18   | 0.14   | 0.16   |
| Curcumin      | 0.2    | 0.15   | 0.13   | 0.16   | 0.13   | 0.1    | 0.07   | 0.06   |
| Doxycycline   | 0.15   | 0.22   | 0.23   | 0.18   | 0.11   | 0.06   | 0.03   | 0.02   |
| Placebo       | 0.01   | 0.03   | 0.04   | 0.08   | 0.14   | 0.24   | 0.31   | 0.15   |
| Probiotics    | 0.13   | 0.07   | 0.06   | 0.07   | 0.13   | 0.11   | 0.11   | 0.31   |
| Triamcinolone | 0.09   | 0.24   | 0.29   | 0.2    | 0.1    | 0.06   | 0.02   | 0      |

### 1.3 Consistency check

| Parameter                         | Median (95% CI)     |
|-----------------------------------|---------------------|
| Random Effects Standard Deviation | 10.38 (0.44, 20.77) |

### 1.4 Convergence Diagnostics

| Parameter                  | PSRF |                                |
|----------------------------|------|--------------------------------|
| d.Placebo.Aloe             | 1.00 | Number of chains : 4           |
| d.Placebo.Benzydamine      | 1.15 | Tuning iterations : 20,000     |
| d.Placebo.Cryotherapy      | 1.67 | Simulation iterations : 50,000 |
| d.Placebo.Doxycycline      | 1.27 | Thinning interval : 10         |
| d.Placebo.Triamcinolone    | 1.26 | Inference samples : 10,000     |
| d.Triamcinolone.Curcumin   | 1.00 | Variance scaling factor: 2.5   |
| d.Triamcinolone.Probiotics | 1.00 |                                |
| sd.d                       | 1.01 |                                |

## 2.Inconsistency Model

### 2.1 Summary estimates

|                        |                       |                        |                       |                       |                        |                        |                       |
|------------------------|-----------------------|------------------------|-----------------------|-----------------------|------------------------|------------------------|-----------------------|
| Aloe                   | 26.37 (-19.12, 69.63) | 0.52 (-41.67, 46.63)   | 20.10 (-30.64, 69.96) | 21.36 (-21.09, 62.32) | 0.02 (-26.07, 27.39)   | 9.32 (-46.39, 65.06)   | 21.39 (-20.86, 62.61) |
| -26.37 (-69.63, 19.12) | Benzydamine           | -25.64 (-77.97, 27.56) | -6.82 (-47.81, 36.07) | -5.16 (-35.60, 26.67) | -26.05 (-62.30, 11.77) | -16.63 (-64.92, 33.82) | -5.12 (-35.69, 25.80) |
| -0.52 (-46.63, 41.67)  | 25.64 (-27.56, 77.97) | Cryotherapy            | 19.40 (-36.75, 73.93) | 21.06 (-29.33, 67.48) | -0.54 (-37.73, 34.47)  | 8.98 (-54.23, 68.23)   | 21.16 (-28.45, 66.85) |
| -20.10 (-69.96, 30.64) | 6.82 (-36.07, 47.81)  | -19.40 (-73.93, 36.75) | Curcumin              | 1.73 (-36.30, 40.16)  | -19.56 (-61.73, 23.43) | -10.75 (-57.04, 37.09) | 1.66 (-26.46, 29.11)  |
| -21.36 (-62.32, 21.09) | 5.16 (-26.67, 35.60)  | -21.06 (-67.48, 29.33) | -1.73 (-40.16, 36.30) | Doxycycline           | -20.91 (-53.45, 12.42) | -12.71 (-56.36, 35.87) | 0.04 (-27.09, 25.96)  |
| -0.02 (-27.39, 26.07)  | 26.05 (-11.77, 62.30) | 0.54 (-34.47, 37.73)   | 19.56 (-23.43, 61.73) | 20.91 (-12.42, 53.45) | Placebo                | 9.30 (-40.48, 59.12)   | 21.25 (-12.39, 53.05) |
| -9.32 (-65.06, 46.39)  | 16.63 (-33.82, 64.92) | -8.98 (-68.23, 54.23)  | 10.75 (-37.09, 57.04) | 12.71 (-35.87, 56.36) | -9.30 (-59.12, 40.48)  | Probiotics             | 12.23 (-26.64, 49.63) |
| -21.39 (-62.61, 20.86) | 5.12 (-25.80, 35.69)  | -21.16 (-66.85, 28.45) | -1.66 (-29.11, 26.46) | -0.04 (-25.96, 27.09) | -21.25 (-53.05, 12.39) | -12.23 (-49.63, 26.64) | Triamcinolone         |

### 2.2 Variance Calculation

| Parameter                         | Median (95% CI)     |
|-----------------------------------|---------------------|
| Random Effects Standard Deviation | 10.63 (0.61, 20.75) |
| Inconsistency Standard Deviation  | 10.50 (0.51, 20.74) |

## 2. Convergence Diagnostics

| Parameter                   | PSRF |                                |
|-----------------------------|------|--------------------------------|
| d.Aloe.Placebo              | 1.00 | Number of chains : 4           |
| d.Benzydamine.Doxycycline   | 1.52 | Tuning iterations : 20,000     |
| d.Doxycycline.Triamcinolone | 1.00 | Simulation iterations : 50,000 |
| d.Placebo.Benzydamine       | 1.34 | Thinning interval : 10         |
| d.Placebo.Cryotherapy       | 1.00 | Inference samples : 10,000     |
| d.Triamcinolone.Curcumin    | 1.00 | Variance scaling factor: 2.5   |
| d.Triamcinolone.Probiotics  | 1.00 |                                |
| sd.d                        | 1.00 |                                |
| sd.w                        | 1.00 |                                |

## 3. Node-splitting analysis

| Name                   | Direct Effect         | Indirect Effect        | Overall               | P-Value |
|------------------------|-----------------------|------------------------|-----------------------|---------|
| Placebo, Triamcinolone | 11.40 (-33.38, 50.39) | 4.38 (-627.78, 629.87) | 13.79 (-14.33, 42.93) | 0.99    |

#### 4. Network structure

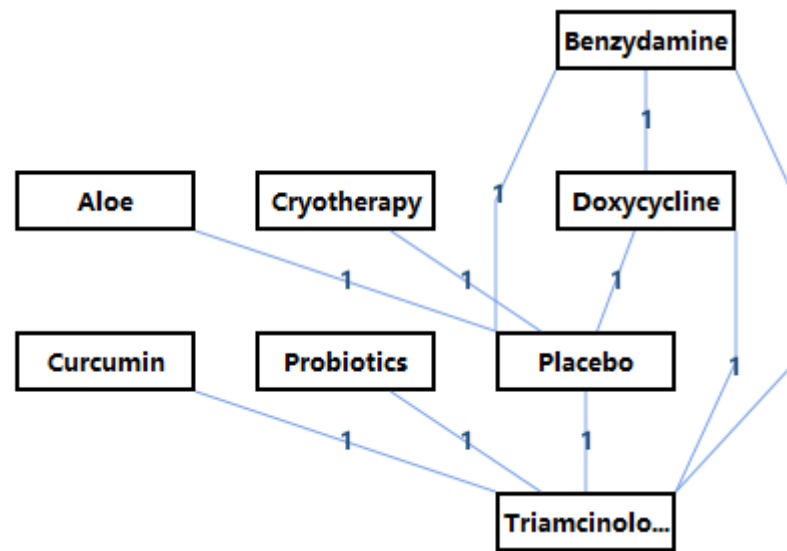

Chapter S3 Symptom-reducing effect

1.Consistency Model

Summary estimates for Symptom-reducing effect

The estimate values for symptom-reducing effect are given as mean difference (MD) and 95% confidence interval (CI). The table shows the pooled estimates based on the network meta-analysis during the treatment period for each study.

|                        |                        |                       |                        |                        |                        |                       |                       |                       |                        |
|------------------------|------------------------|-----------------------|------------------------|------------------------|------------------------|-----------------------|-----------------------|-----------------------|------------------------|
| Mean                   | -1113 (-69.75, 47.06)  | -048 (-51.98, 51.98)  | -681 (-69.49, 57.85)   | -733 (-75.31, 59.28)   | -1521 (-67.00, 56.61)  | 435 (-63.41, 74.46)   | 878 (-53.20, 68.00)   | -510 (-45.50, 52.19)  | -624 (-74.41, 60.99)   |
| 1113 (-47.06, 69.75)   | Alco                   | 1104 (-26.53, 49.29)  | 446 (-46.64, 57.67)    | 364 (-54.99, 64.38)    | -378 (-66.84, 59.91)   | 1557 (-43.06, 75.11)  | 1952 (-26.95, 67.12)  | 573 (-44.96, 54.53)   | 517 (-59.64, 63.57)    |
| 046 (-51.98, 51.98)    | -1104 (-49.29, 26.53)  | Amoxiclav             | -604 (-49.98, 36.96)   | -713 (-59.15, 45.02)   | -1516 (-71.55, 42.48)  | 510 (-47.83, 56.04)   | 819 (-30.35, 48.31)   | -515 (-39.52, 29.55)  | -578 (-57.62, 44.66)   |
| 681 (-57.85, 69.49)    | -446 (-57.67, 46.64)   | 604 (-36.96, 49.98)   | Benzocaine             | -133 (-63.47, 63.12)   | -829 (-76.68, 57.75)   | 1127 (-52.03, 74.46)  | 1444 (-35.37, 65.93)  | 117 (-51.24, 53.76)   | 060 (-63.32, 62.90)    |
| 733 (-59.28, 76.31)    | -364 (-64.38, 54.99)   | 713 (-45.02, 58.15)   | 133 (-63.12, 63.47)    | Betterer pain          | -791 (-78.66, 64.66)   | 1200 (-58.02, 62.88)  | 1563 (-43.16, 75.95)  | 228 (-58.73, 61.93)   | 147 (-67.67, 69.65)    |
| 1521 (-67.00, 67.00)   | 378 (-59.91, 66.94)    | 1516 (-42.48, 71.55)  | 829 (-57.75, 76.68)    | 791 (-64.66, 78.66)    | Chinoin                | 1992 (-53.93, 83.32)  | 2357 (-41.96, 86.94)  | 974 (-56.05, 72.70)   | 929 (-63.25, 78.58)    |
| -435 (-74.46, 63.41)   | -1557 (-75.11, 43.06)  | -510 (-58.04, 47.83)  | -1122 (-74.46, 52.03)  | -1200 (-62.88, 58.02)  | -1992 (-93.32, 53.93)  | Chlorothaliv          | 385 (-53.55, 60.13)   | -978 (-72.01, 50.47)  | -1064 (-80.90, 59.14)  |
| -878 (-68.00, 53.20)   | -1952 (-72.12, 26.95)  | -819 (-48.31, 30.35)  | -1444 (-65.83, 35.97)  | -1563 (-75.95, 43.16)  | -2357 (-86.94, 41.96)  | -381 (-60.13, 53.95)  | Cucurin               | -1319 (-63.86, 34.96) | -1412 (-74.81, 46.31)  |
| 510 (-52.19, 65.20)    | -573 (-54.53, 41.96)   | 515 (-29.62, 39.53)   | -117 (-50.76, 51.24)   | -228 (-61.93, 58.73)   | -974 (-72.70, 55.05)   | 978 (-50.47, 72.01)   | 1319 (-34.96, 63.86)  | Dexamethasone         | -100 (-60.79, 58.99)   |
| 624 (-60.86, 74.41)    | -517 (-63.37, 53.64)   | 578 (-44.66, 57.68)   | -604 (-62.90, 63.32)   | -147 (-69.65, 67.67)   | -929 (-78.93, 63.25)   | 1064 (-58.14, 60.90)  | 1412 (-46.31, 74.81)  | 1007 (-59.93, 67.79)  | Dexamethasone          |
| 1380 (-40.31, 67.06)   | 273 (-38.11, 42.59)    | 1341 (-16.87, 43.26)  | 707 (-35.26, 48.88)    | 614 (-47.12, 59.18)    | -190 (-59.23, 56.75)   | 1851 (-36.62, 73.79)  | 2194 (-19.85, 64.81)  | 836 (-39.93, 59.47)   | 75 (-47.24, 60.81)     |
| 230 (-51.28, 57.04)    | -856 (-50.29, 31.57)   | 207 (-26.50, 31.34)   | -397 (-51.06, 41.89)   | -515 (-59.03, 49.13)   | -1285 (-70.28, 45.70)  | 703 (-48.88, 62.80)   | 1059 (-30.93, 54.27)  | -278 (-45.77, 38.95)  | -348 (-58.22, 50.02)   |
| -2260 (-69.40, 46.50)  | -2367 (-94.40, 27.91)  | -2317 (-74.90, 31.19) | -2930 (-91.86, 35.12)  | -3025 (-98.02, 38.57)  | -3785 (-107.64, 34.45) | -1790 (-67.36, 55.52) | -1462 (-73.86, 48.19) | -2777 (-86.91, 32.53) | -2837 (-86.07, 40.42)  |
| -888 (-58.79, 42.10)   | -1967 (-56.44, 16.80)  | -895 (-31.73, 14.74)  | -1560 (-58.55, 27.47)  | -1620 (-66.31, 34.94)  | -2298 (-78.47, 39.41)  | -3386 (-45.28, 48.70) | -048 (-37.26, 36.66)  | -1400 (-51.54, 23.57) | -1494 (-65.76, 36.07)  |
| -1342 (-101.20, 72.44) | -2428 (-105.48, 53.55) | -1326 (-88.22, 59.65) | -2006 (-101.17, 62.00) | -2104 (-108.15, 64.66) | -2855 (-120.37, 61.91) | -830 (-41.99, 42.94)  | -473 (-62.45, 70.35)  | -1859 (-99.83, 60.50) | -1927 (-108.16, 67.11) |
| 2368 (-23.63, 71.40)   | 1251 (-21.63, 40.30)   | 2326 (4.15, 42.15)    | 1716 (-24.03, 57.33)   | 1608 (-31.45, 65.31)   | 808 (-44.73, 62.88)    | 2819 (-21.68, 80.09)  | 3175 (-3.69, 68.34)   | 1831 (-16.50, 52.81)  | 1741 (-31.22, 65.56)   |
| 1832 (-38.88, 77.09)   | 738 (-38.47, 52.86)    | 1811 (-19.40, 54.55)  | 1177 (-38.87, 64.16)   | 1076 (-46.05, 69.73)   | 314 (-57.41, 65.31)    | 2252 (-37.53, 64.26)  | 2648 (-21.04, 74.20)  | 1286 (-34.61, 60.46)  | 1207 (-44.86, 68.66)   |
| -032 (-80.47, 81.21)   | -1187 (-84.22, 61.96)  | -045 (-68.52, 67.87)  | -641 (-59.13, 44.18)   | -793 (-89.00, 72.93)   | -153 (-99.54, 68.35)   | 457 (-76.78, 85.38)   | 754 (-43.88, 81.64)   | -602 (-73.57, 66.88)  | -696 (-87.12, 75.67)   |
| -267 (-71.14, 65.26)   | -1375 (-71.36, 45.54)  | -277 (-53.37, 48.34)  | -883 (-72.51, 53.97)   | -1003 (-75.82, 57.53)  | -1821 (-89.10, 54.22)  | 221 (-68.39, 73.94)   | 557 (-52.32, 66.02)   | -841 (-45.11, 51.65)  | -851 (-75.81, 59.70)   |
| -1131 (-96.64, 72.67)  | -2259 (-98.43, 53.59)  | -1174 (-82.70, 61.38) | -1800 (-46.56, 61.93)  | -1933 (-102.53, 66.83) | -2701 (-116.27, 62.94) | -667 (-43.92, 41.44)  | -332 (-77.49, 71.95)  | -1691 (-94.24, 61.68) | -1737 (-102.73, 68.10) |
| -501 (-56.21, 46.14)   | -1602 (-51.47, 18.38)  | -498 (-29.39, 18.10)  | -1121 (-52.26, 29.12)  | -1239 (-63.00, 38.53)  | -2031 (-75.42, 36.43)  | -038 (-47.33, 47.38)  | 311 (-27.44, 34.40)   | -1019 (-49.11, 28.52) | -1127 (-63.29, 40.42)  |
| -061 (-64.30, 63.96)   | -1217 (-64.83, 41.05)  | -100 (-46.83, 44.17)  | -718 (-64.49, 42.29)   | -813 (-71.00, 54.56)   | -1641 (-82.53, 52.68)  | 383 (-60.21, 66.49)   | 729 (-44.85, 59.78)   | -633 (-80.21, 47.23)  | -796 (-71.51, 56.74)   |
| 1385 (-53.92, 82.30)   | 257 (-58.36, 61.57)    | 1382 (-38.34, 65.86)  | 700 (-55.47, 69.16)    | 646 (-59.88, 75.09)    | -134 (-72.17, 70.89)   | 1850 (-52.45, 89.74)  | 2182 (-37.45, 82.78)  | 875 (-52.20, 67.58)   | 768 (-61.58, 74.55)    |

|                         |                        |                        |                        |                        |                         |                         |                         |                        |                        |                        |                        |                         |
|-------------------------|------------------------|------------------------|------------------------|------------------------|-------------------------|-------------------------|-------------------------|------------------------|------------------------|------------------------|------------------------|-------------------------|
| -12.80 (-67.06, 40.31)  | -2.30 (-57.04, 51.28)  | 22.60 (-46.50, 89.40)  | 8.88 (-42.10, 59.79)   | 13.42 (-72.54, 101.20) | -23.88 (-71.40, 23.63)  | -18.32 (-77.09, 38.88)  | 0.32 (-81.21, 80.47)    | 2.67 (-46.56, 71.14)   | 11.31 (-72.67, 95.64)  | 5.01 (-46.14, 56.23)   | 0.81 (-63.96, 64.30)   | -13.95 (-62.30, 53.92)  |
| -2.73 (-42.52, 39.11)   | 8.56 (-31.57, 50.29)   | 33.67 (-27.91, 94.40)  | 19.67 (-16.60, 56.44)  | 24.26 (-53.55, 106.48) | -12.51 (-46.30, 21.63)  | -7.28 (-52.86, 39.47)   | 11.87 (-61.96, 84.22)   | 13.76 (-45.54, 71.36)  | 22.59 (-53.39, 99.43)  | 16.02 (-19.38, 51.47)  | 12.17 (-41.05, 64.93)  | -2.57 (-61.57, 59.56)   |
| -13.41 (-43.26, 16.87)  | -2.07 (-31.34, 26.50)  | 23.17 (-31.19, 74.90)  | 8.95 (-14.74, 31.73)   | 13.26 (-59.65, 88.22)  | -23.28 (-42.15, -4.15)  | -18.11 (-54.95, 19.40)  | 0.45 (-67.68, 82)       | 2.77 (-48.34, 53.37)   | 11.74 (-61.38, 82.70)  | 4.98 (-18.10, 23.39)   | 1.00 (-44.17, 46.93)   | -13.62 (-65.86, 38.34)  |
| -7.07 (-48.88, 35.26)   | 3.97 (-41.88, 51.06)   | 29.10 (-35.12, 91.89)  | 15.06 (-27.47, 59.35)  | 20.06 (-62.01, 101.17) | -17.18 (-57.33, 24.03)  | -11.77 (-64.16, 38.87)  | 6.41 (-44.18, 59.13)    | 8.83 (-53.97, 72.51)   | 18.00 (-61.93, 96.26)  | 11.21 (-29.12, 52.26)  | 7.18 (-49.25, 64.49)   | -7.00 (-69.16, 55.47)   |
| -6.14 (-59.18, 47.12)   | 5.15 (-49.13, 59.03)   | 30.25 (-38.57, 99.02)  | 16.20 (-34.94, 68.31)  | 21.04 (-64.66, 108.15) | -1.66 (-65.31, 31.45)   | -10.76 (-60.73, 48.05)  | 7.93 (-72.93, 89.00)    | 10.05 (-57.53, 75.62)  | 19.33 (-65.83, 102.53) | 12.39 (-39.53, 63.00)  | 8.13 (-54.56, 71.00)   | -6.46 (-75.09, 59.99)   |
| 1.90 (-56.75, 59.23)    | 12.85 (-45.70, 70.28)  | 37.85 (-34.95, 107.64) | 23.98 (-32.41, 79.47)  | 28.55 (-61.91, 120.37) | -8.08 (-62.68, 44.73)   | -3.14 (-65.31, 57.14)   | 15.53 (-89.35, 99.54)   | 18.21 (-54.22, 89.10)  | 27.01 (-62.04, 116.27) | 20.31 (-38.43, 75.42)  | 18.41 (-52.89, 83.29)  | 1.34 (-70.89, 72.17)    |
| -18.51 (-73.73, 36.62)  | -7.03 (-62.80, 48.98)  | 17.90 (-55.52, 87.30)  | 3.98 (-48.70, 55.28)   | 8.90 (-42.94, 61.99)   | -28.18 (-40.09, 21.68)  | -22.52 (-84.26, 37.53)  | -4.57 (-85.38, 76.78)   | -2.21 (-73.94, 68.39)  | 6.67 (-41.44, 53.92)   | 0.58 (-47.98, 47.33)   | -3.83 (-66.48, 60.21)  | -18.50 (-89.74, 52.45)  |
| -21.94 (-64.81, 19.83)  | -10.59 (-54.27, 30.93) | 14.62 (-48.19, 73.83)  | 0.48 (-30.66, 37.26)   | 4.72 (-70.35, 82.45)   | -31.75 (-68.34, 3.69)   | -26.48 (-74.20, 21.04)  | -7.54 (-81.64, 63.98)   | -5.57 (-66.02, 52.32)  | 3.32 (-71.95, 77.49)   | -3.11 (-39.40, 27.44)  | -7.28 (-59.76, 44.85)  | -21.82 (-82.78, 37.45)  |
| -8.86 (-50.47, 33.83)   | 2.78 (-38.96, 48.77)   | 27.77 (-32.53, 86.91)  | 14.00 (-23.57, 51.54)  | 18.88 (-60.50, 99.83)  | -18.31 (-52.81, 16.50)  | -12.86 (-60.46, 34.61)  | 6.02 (-66.86, 79.37)    | 8.41 (-51.66, 66.11)   | 16.01 (-61.68, 94.24)  | 10.19 (-28.52, 49.11)  | 6.33 (-47.23, 60.21)   | -8.75 (-67.98, 52.20)   |
| -7.53 (-60.81, 47.34)   | 3.48 (-50.02, 58.22)   | 28.37 (-40.42, 98.07)  | 14.94 (-38.07, 65.78)  | 19.37 (-67.11, 108.16) | -17.41 (-45.56, 31.22)  | -12.07 (-68.66, 44.86)  | 6.96 (-75.67, 87.12)    | 8.51 (-59.70, 75.81)   | 17.37 (-68.10, 102.73) | 11.27 (-40.42, 63.29)  | 7.06 (-56.74, 71.51)   | -7.88 (-74.55, 61.58)   |
| Dynamic                 | 11.30 (-22.44, 43.57)  | 36.17 (-19.34, 90.43)  | 22.38 (-47.76, 50.25)  | 27.17 (-48.19, 103.87) | -10.00 (-34.51, 13.65)  | -4.72 (-44.91, 35.41)   | 13.99 (-50.83, 79.24)   | 16.02 (-37.94, 68.53)  | 25.11 (-48.92, 97.55)  | 18.39 (-9.26, 46.67)   | 14.35 (-33.89, 61.84)  | -0.71 (-53.33, 52.75)   |
| -11.30 (-43.51, 22.44)  | Dynamic                | 25.07 (-30.21, 79.20)  | 11.08 (-16.23, 38.16)  | 15.88 (-59.61, 92.11)  | -2.11 (-44.22, 2.27)    | -16.00 (-56.40, 25.25)  | 2.76 (-66.14, 71.12)    | 5.25 (-45.45, 57.80)   | 13.76 (-59.97, 87.11)  | 7.30 (-21.39, 36.03)   | 3.33 (-45.32, 50.78)   | -11.45 (-60.11, 42.06)  |
| -38.17 (-90.45, 19.34)  | -25.07 (-79.20, 30.21) | Dynamic                | -14.15 (-65.20, 39.06) | -9.53 (-95.34, 81.53)  | -46.48 (-94.73, 3.77)   | -40.82 (-90.20, 18.50)  | -22.63 (-103.13, 59.67) | -20.12 (-87.61, 47.67) | -11.79 (-56.27, 74.71) | -17.95 (-49.46, 36.39) | -21.61 (-86.94, 44.52) | -36.23 (-104.82, 33.91) |
| -22.35 (-50.25, 6.76)   | -11.08 (-38.16, 16.23) | 14.15 (-38.06, 65.20)  | Linear                 | 4.53 (-67.96, 79.56)   | -32.21 (-48.08, -16.39) | -28.83 (-62.81, 8.51)   | -8.44 (-74.54, 58.20)   | -6.07 (-56.28, 43.35)  | 2.78 (-88.75, 72.64)   | -3.74 (-29.22, 18.50)  | -7.81 (-51.89, 35.95)  | -22.46 (-79.28, 28.18)  |
| -27.17 (-103.67, 48.19) | -15.88 (-42.11, 59.61) | 9.53 (-81.53, 95.36)   | -4.53 (-79.66, 67.96)  | Dynamic                | -36.75 (-111.29, 35.20) | -31.86 (-112.07, 47.24) | -13.11 (-107.24, 82.42) | -10.61 (-98.37, 76.63) | -2.61 (-71.77, 68.59)  | -8.35 (-79.41, 61.37)  | -12.42 (-96.10, 69.89) | -27.04 (-117.14, 61.20) |
| 10.00 (-13.65, 34.51)   | 21.10 (-237.44, 72)    | 46.49 (-3.77, 94.73)   | 32.21 (16.38, 48.08)   | 36.75 (-35.20, 111.29) | Dynamic                 | 5.25 (-26.72, 37.76)    | 23.62 (-41.49, 88.72)   | 26.05 (-21.81, 73.10)  | 34.80 (-35.11, 104.24) | 28.45 (10.36, 46.76)   | 24.69 (-17.95, 66.07)  | 9.53 (-38.55, 58.13)    |
| 4.72 (-35.41, 44.91)    | 16.00 (-25.55, 56.40)  | 40.82 (-18.56, 98.20)  | 26.83 (-8.51, 62.81)   | 31.86 (-47.24, 112.07) | -5.25 (-37.76, 26.72)   | Dynamic                 | 18.81 (-52.26, 89.91)   | 20.77 (-35.98, 77.43)  | 30.05 (-49.02, 106.89) | 22.94 (-19.29, 60.68)  | 19.27 (-33.74, 72.95)  | 4.34 (-53.30, 63.20)    |
| -13.99 (-79.24, 52.83)  | -2.76 (-71.12, 65.14)  | 22.63 (-59.67, 103.13) | 8.44 (-58.20, 74.54)   | 13.12 (-82.42, 107.24) | -23.82 (-88.72, 41.49)  | -18.81 (-89.91, 52.26)  | Dynamic                 | 2.21 (-77.47, 82.40)   | 10.86 (-94.23, 105.86) | 4.67 (-60.23, 70.61)   | 0.14 (-76.59, 79.24)   | -14.43 (-94.23, 67.61)  |
| -16.02 (-68.53, 37.84)  | -5.25 (-57.80, 49.45)  | 20.12 (-47.67, 87.61)  | 6.07 (-43.35, 55.28)   | 10.61 (-76.63, 99.37)  | -26.05 (-73.10, 21.13)  | -20.77 (-77.43, 35.98)  | -2.21 (-82.40, 77.47)   | Dynamic                | 9.20 (-76.67, 94.61)   | 2.52 (-47.78, 53.88)   | -1.40 (-64.41, 61.75)  | -16.32 (-89.45, 51.89)  |
| -25.11 (-71.55, 48.92)  | -13.76 (-87.11, 59.97) | 11.79 (-74.71, 95.27)  | -2.78 (-72.64, 68.75)  | 2.61 (-68.59, 71.77)   | -34.80 (-104.24, 35.11) | -30.06 (-105.89, 49.02) | -10.98 (-105.86, 84.23) | -9.20 (-94.61, 76.67)  | Dynamic                | -6.49 (-75.01, 61.49)  | -10.67 (-89.82, 69.99) | -25.44 (-104.44, 61.69) |
| -18.39 (-46.67, 9.26)   | -7.30 (-36.03, 21.39)  | 17.95 (-36.39, 69.46)  | 3.74 (-16.50, 23.22)   | 8.98 (-61.37, 79.41)   | -28.46 (-46.76, -10.39) | -22.94 (-60.68, 13.29)  | -4.67 (-70.61, 60.23)   | -2.52 (-53.88, 47.78)  | 6.49 (-61.48, 75.01)   | Dynamic                | -4.01 (-46.35, 37.87)  | -18.74 (-70.98, 32.54)  |
| -14.35 (-61.84, 33.69)  | -3.33 (-30.78, 45.32)  | 21.61 (-44.52, 86.94)  | 7.81 (-35.95, 51.89)   | 12.42 (-69.89, 96.10)  | -24.80 (-66.07, 17.88)  | -19.27 (-72.05, 33.74)  | -0.14 (-79.24, 76.59)   | 1.40 (-61.75, 64.41)   | 10.67 (-69.89, 89.62)  | 4.01 (-37.87, 46.35)   | Dynamic                | -14.62 (-77.79, 48.99)  |
| 0.71 (-52.75, 53.33)    | 11.45 (-42.06, 65.01)  | 36.23 (-39.91, 104.82) | 22.46 (-28.18, 73.28)  | 27.04 (-61.20, 117.14) | -9.53 (-98.13, 38.55)   | -4.34 (-63.20, 53.50)   | 14.43 (-67.61, 94.23)   | 16.33 (-51.86, 83.45)  | 25.44 (-61.69, 110.44) | 18.74 (-32.54, 70.98)  | 14.62 (-48.99, 77.79)  | Dynamic                 |

Rank probability

Rank 1 is best, rank N is worst.

| Drug                    | Rank 1 | Rank 2 | Rank 3 | Rank 4 | Rank 5 | Rank 6 | Rank 7 | Rank 8 | Rank 9 | Rank 10 | Rank 11 | Rank 12 | Rank 13 | Rank 14 | Rank 15 | Rank 16 | Rank 17 |
|-------------------------|--------|--------|--------|--------|--------|--------|--------|--------|--------|---------|---------|---------|---------|---------|---------|---------|---------|
| Allicin                 | 0.05   | 0.06   | 0.05   | 0.05   | 0.05   | 0.05   | 0.04   | 0.04   | 0.04   | 0.04    | 0.04    | 0.04    | 0.04    | 0.04    | 0.04    | 0.04    | 0.04    |
| Aloe                    | 0      | 0.01   | 0.01   | 0.02   | 0.02   | 0.02   | 0.03   | 0.03   | 0.04   | 0.04    | 0.04    | 0.05    | 0.06    | 0.06    | 0.07    | 0.08    | 0.07    |
| Amlexanox               | 0      | 0.01   | 0.01   | 0.02   | 0.04   | 0.05   | 0.06   | 0.07   | 0.08   | 0.1     | 0.1     | 0.1     | 0.09    | 0.08    | 0.06    | 0.05    | 0.04    |
| Benzylamine             | 0.01   | 0.02   | 0.03   | 0.03   | 0.04   | 0.04   | 0.04   | 0.04   | 0.04   | 0.05    | 0.05    | 0.05    | 0.05    | 0.05    | 0.06    | 0.05    | 0.06    |
| Berberine gelatin       | 0.03   | 0.03   | 0.04   | 0.04   | 0.04   | 0.04   | 0.03   | 0.04   | 0.03   | 0.04    | 0.04    | 0.04    | 0.04    | 0.04    | 0.05    | 0.05    | 0.05    |
| Chitosan                | 0.02   | 0.03   | 0.03   | 0.03   | 0.03   | 0.03   | 0.03   | 0.03   | 0.03   | 0.02    | 0.03    | 0.03    | 0.04    | 0.04    | 0.04    | 0.04    | 0.05    |
| Chlorhexidine           | 0.01   | 0.06   | 0.1    | 0.08   | 0.07   | 0.06   | 0.04   | 0.04   | 0.04   | 0.04    | 0.04    | 0.04    | 0.04    | 0.04    | 0.04    | 0.03    | 0.04    |
| Curcumin                | 0.04   | 0.07   | 0.08   | 0.09   | 0.08   | 0.07   | 0.07   | 0.06   | 0.06   | 0.05    | 0.05    | 0.05    | 0.04    | 0.04    | 0.03    | 0.03    | 0.03    |
| Dexamethasone           | 0.01   | 0.02   | 0.03   | 0.04   | 0.04   | 0.04   | 0.04   | 0.04   | 0.05   | 0.05    | 0.05    | 0.06    | 0.05    | 0.06    | 0.06    | 0.06    | 0.06    |
| Diosmectite             | 0.03   | 0.04   | 0.04   | 0.04   | 0.04   | 0.04   | 0.04   | 0.04   | 0.03   | 0.04    | 0.04    | 0.04    | 0.04    | 0.04    | 0.05    | 0.04    | 0.05    |
| Doxycycline             | 0      | 0      | 0      | 0.01   | 0.01   | 0.01   | 0.01   | 0.02   | 0.02   | 0.03    | 0.04    | 0.05    | 0.06    | 0.07    | 0.08    | 0.09    | 0.1     |
| Glycyrrhiza             | 0      | 0.01   | 0.02   | 0.03   | 0.04   | 0.05   | 0.05   | 0.06   | 0.06   | 0.07    | 0.08    | 0.08    | 0.08    | 0.08    | 0.07    | 0.07    | 0.05    |
| Insulin-liposomal gel   | 0.24   | 0.15   | 0.1    | 0.08   | 0.06   | 0.04   | 0.04   | 0.04   | 0.03   | 0.03    | 0.02    | 0.02    | 0.02    | 0.02    | 0.02    | 0.02    | 0.01    |
| Laser                   | 0.01   | 0.03   | 0.05   | 0.09   | 0.11   | 0.12   | 0.12   | 0.11   | 0.1    | 0.08    | 0.06    | 0.05    | 0.03    | 0.02    | 0.01    | 0.01    | 0       |
| N-acetylcysteine        | 0.18   | 0.12   | 0.08   | 0.06   | 0.05   | 0.04   | 0.03   | 0.03   | 0.02   | 0.03    | 0.02    | 0.03    | 0.03    | 0.03    | 0.03    | 0.03    | 0.02    |
| Placebo                 | 0      | 0      | 0      | 0      | 0      | 0      | 0      | 0      | 0      | 0       | 0       | 0       | 0       | 0       | 0.02    | 0.04    | 0.08    |
| Probiotics              | 0      | 0      | 0      | 0.01   | 0.01   | 0.01   | 0.02   | 0.01   | 0.02   | 0.03    | 0.03    | 0.03    | 0.04    | 0.05    | 0.06    | 0.07    | 0.07    |
| Quercetin               | 0.1    | 0.07   | 0.06   | 0.05   | 0.04   | 0.04   | 0.03   | 0.03   | 0.03   | 0.03    | 0.03    | 0.03    | 0.03    | 0.03    | 0.03    | 0.04    | 0.03    |
| Silver nitrate          | 0.06   | 0.07   | 0.06   | 0.06   | 0.05   | 0.05   | 0.04   | 0.04   | 0.04   | 0.04    | 0.04    | 0.04    | 0.04    | 0.04    | 0.04    | 0.04    | 0.04    |
| Sucralfate              | 0.15   | 0.12   | 0.08   | 0.06   | 0.05   | 0.04   | 0.03   | 0.03   | 0.03   | 0.03    | 0.03    | 0.03    | 0.03    | 0.03    | 0.03    | 0.03    | 0.03    |
| Triamcinolone           | 0      | 0.01   | 0.02   | 0.04   | 0.06   | 0.09   | 0.12   | 0.12   | 0.12   | 0.11    | 0.1     | 0.08    | 0.05    | 0.04    | 0.02    | 0.01    | 0.01    |
| Triester Glycerol Oxide | 0.03   | 0.05   | 0.06   | 0.06   | 0.06   | 0.05   | 0.05   | 0.05   | 0.05   | 0.05    | 0.04    | 0.05    | 0.05    | 0.05    | 0.05    | 0.05    | 0.04    |
| Zinc                    | 0.02   | 0.02   | 0.03   | 0.03   | 0.03   | 0.03   | 0.03   | 0.03   | 0.03   | 0.03    | 0.03    | 0.04    | 0.04    | 0.04    | 0.05    | 0.05    | 0.05    |

|         |         |         |         |         |         |
|---------|---------|---------|---------|---------|---------|
| Rank 18 | Rank 19 | Rank 20 | Rank 21 | Rank 22 | Rank 23 |
| 0.04    | 0.04    | 0.04    | 0.04    | 0.04    | 0.04    |
| 0.07    | 0.06    | 0.06    | 0.06    | 0.06    | 0.05    |
| 0.02    | 0.01    | 0.01    | 0       | 0       | 0       |
| 0.05    | 0.05    | 0.04    | 0.05    | 0.05    | 0.03    |
| 0.05    | 0.05    | 0.05    | 0.05    | 0.07    | 0.08    |
| 0.05    | 0.05    | 0.06    | 0.06    | 0.09    | 0.16    |
| 0.03    | 0.03    | 0.03    | 0.04    | 0.03    | 0.01    |
| 0.02    | 0.02    | 0.01    | 0.01    | 0.01    | 0       |
| 0.05    | 0.05    | 0.04    | 0.04    | 0.06    | 0.07    |
| 0.1     | 0.09    | 0.08    | 0.06    | 0.04    | 0.02    |
| 0.04    | 0.03    | 0.02    | 0.01    | 0.01    | 0       |
| 0.01    | 0.01    | 0.01    | 0.01    | 0.01    | 0.01    |
| 0       | 0       | 0       | 0       | 0       | 0       |
| 0.02    | 0.02    | 0.03    | 0.03    | 0.04    | 0.05    |
| 0.13    | 0.19    | 0.21    | 0.18    | 0.1     | 0.03    |
| 0.07    | 0.08    | 0.08    | 0.09    | 0.11    | 0.09    |
| 0.03    | 0.03    | 0.03    | 0.04    | 0.06    | 0.08    |
| 0.04    | 0.03    | 0.03    | 0.03    | 0.04    | 0.04    |
| 0.02    | 0.02    | 0.03    | 0.03    | 0.04    | 0.05    |
| 0       | 0       | 0       | 0       | 0       | 0       |
| 0.04    | 0.03    | 0.03    | 0.03    | 0.03    | 0.03    |
| 0.05    | 0.05    | 0.06    | 0.07    | 0.09    | 0.13    |

### Consistency check

| Parameter                         | Median (95% CI)      |
|-----------------------------------|----------------------|
| Random Effects Standard Deviation | 23.46 (18.29, 31.60) |

### Convergence Diagnostics

Convergence is assessed using the Brooks-Gelman-Rubin method. This method compares within-chain and between-chain variance to calculate the Potential Scale Reduction Factor (PSRF). A PSRF close to one indicates approximate convergence has been reached.

| Parameter                              | PSRF |
|----------------------------------------|------|
| d.Benzydamine.Quercetin                | 1.00 |
| d.Chlorhexidine.Nacetylcysteine        | 1.00 |
| d.Chlorhexidine.Sucralfate             | 1.00 |
| d.Placebo.Allicin                      | 1.00 |
| d.Placebo.Berberinegelatin             | 1.00 |
| d.Placebo.Chitosan                     | 1.00 |
| d.Placebo.Dexamethasone                | 1.00 |
| d.Placebo.Diosmectite                  | 1.00 |
| d.Placebo.Glycyrrhiza                  | 1.00 |
| d.Placebo.InsulinliposomIgel           | 1.05 |
| d.Placebo.Probiotics                   | 1.00 |
| d.Placebo.Silvernitrate                | 1.00 |
| d.Placebo.Zinc                         | 1.01 |
| d.Triamcinolone.Aloe                   | 1.00 |
| d.Triamcinolone.Amlexanox              | 1.00 |
| d.Triamcinolone.Benzydamine            | 1.01 |
| d.Triamcinalone.Chlorhexidine          | 1.00 |
| d.Triamcinolone.Curcumin               | 1.00 |
| d.Triamcinolone.Doxycycline            | 1.01 |
| d.Triamcinolone.Laser                  | 1.01 |
| d.Triamcinolone.Placebo                | 1.01 |
| d.Triamcinolone. TriesterGlycerolOxide | 1.00 |
| sd.d                                   | 1.01 |

Number of chains : 4  
Tuning iterations : 20,000  
Simulation iterations : 50,000  
Thinning interval : 10  
Inference samples : 10,000  
Variance scaling factor : 2.5



## 2.Inconsistency Model

### Summary estimates for Symptom-reducing effect

The estimate values for symptom-reducing effect are given as mean difference (MD) and 95% confidence interval (CI). The table shows the pooled estimates based on the network meta-analysis during the treatment period for each study.

[illegible]

|                         |                         |                        |                        |                         |                         |                         |                         |                         |                         |                        |                        |                         |
|-------------------------|-------------------------|------------------------|------------------------|-------------------------|-------------------------|-------------------------|-------------------------|-------------------------|-------------------------|------------------------|------------------------|-------------------------|
| -11.14 (-47.45, 45.36)  | -8.25 (-68.77, 49.84)   | 25.97 (-41.84, 96.46)  | 8.39 (-46.32, 62.92)   | 14.27 (-75.83, 102.11)  | -24.84 (-71.69, 24.76)  | -19.02 (-76.27, 39.73)  | 2.65 (-60.63, 64.95)    | 1.67 (-45.12, 69.95)    | 11.24 (-75.84, 96.85)   | 4.99 (-48.42, 59.79)   | 2.60 (-42.74, 69.77)   | -8.04 (-77.79, 63.65)   |
| -0.56 (-44.11, 43.38)   | 3.20 (-47.97, 45.49)    | 36.49 (-22.07, 94.79)  | 19.00 (-22.94, 57.23)  | 24.69 (-55.35, 103.55)  | -13.46 (-48.45, 18.96)  | -8.53 (-55.04, 38.69)   | 13.16 (-59.57, 87.34)   | 13.14 (-46.15, 70.98)   | 21.54 (-56.24, 98.04)   | 15.82 (-21.21, 52.08)  | 13.53 (-43.22, 67.14)  | 2.20 (-58.69, 64.59)    |
| -9.31 (-45.43, 33.45)   | -4.51 (-37.91, 27.48)   | 29.05 (-23.77, 83.08)  | 11.60 (-15.55, 40.54)  | 17.64 (-59.08, 94.08)   | -24.04 (-44.21, -3.82)  | -15.32 (-53.88, 25.26)  | 5.66 (-64.84, 77.92)    | 5.25 (-7.81, 59.15)     | 13.88 (-59.40, 87.25)   | 8.02 (-19.05, 39.22)   | 5.90 (-42.50, 57.22)   | -5.22 (-59.56, 54.60)   |
| -6.61 (-49.54, 36.97)   | -2.58 (-60.35, 55.12)   | 30.76 (-32.60, 95.42)  | 13.50 (-35.61, 59.35)  | 18.96 (-63.75, 102.97)  | -17.90 (-65.23, 29.20)  | -13.80 (-67.29, 39.81)  | 7.62 (-42.49, 59.16)    | 6.54 (-56.85, 72.36)    | 15.46 (-64.44, 95.68)   | 10.28 (-31.53, 52.12)  | 8.21 (-49.53, 64.73)   | -3.39 (-69.26, 64.98)   |
| -3.13 (-57.95, 53.47)   | 0.49 (-59.60, 56.71)    | 34.21 (-33.48, 101.22) | 16.93 (-38.30, 70.11)  | 22.41 (-66.61, 109.28)  | -16.10 (-63.94, 31.59)  | -10.39 (-67.92, 47.63)  | 10.88 (-70.67, 94.20)   | 10.52 (-59.02, 77.24)   | 19.33 (-68.82, 104.30)  | 13.19 (-38.73, 66.27)  | 11.24 (-55.02, 76.87)  | -0.46 (-74.60, 71.04)   |
| 3.96 (-55.64, 65.10)    | 7.55 (-56.24, 67.86)    | 41.64 (-29.85, 113.55) | 24.32 (-34.82, 79.39)  | 29.70 (-61.17, 123.46)  | -8.40 (-61.76, 45.59)   | -3.06 (-64.65, 57.55)   | 18.02 (-66.29, 103.64)  | 17.66 (-52.92, 88.11)   | 25.85 (-62.04, 114.71)  | 20.89 (-37.36, 77.60)  | 18.17 (-51.74, 86.93)  | 7.86 (-65.87, 81.60)    |
| -16.31 (-72.42, 41.61)  | -12.28 (-74.82, 48.36)  | 21.27 (-51.72, 92.90)  | 3.96 (-53.07, 57.90)   | 9.42 (-41.88, 61.60)    | -28.83 (-81.27, 24.99)  | -22.24 (-86.23, 38.89)  | -1.69 (-83.14, 81.37)   | -2.43 (-75.12, 69.77)   | 6.24 (-41.36, 53.97)    | 0.59 (-47.06, 48.34)   | -2.22 (-64.60, 64.37)  | -13.26 (-85.70, 61.65)  |
| -19.22 (-64.18, 25.89)  | -15.81 (-67.79, 31.01)  | 17.27 (-43.69, 78.93)  | 0.09 (-41.52, 40.46)   | 5.90 (-71.26, 84.71)    | -32.48 (-71.20, 5.89)   | -27.00 (-77.35, 22.75)  | -5.81 (-78.58, 68.05)   | -5.93 (-67.51, 55.13)   | 2.99 (-72.23, 77.55)    | -3.10 (-33.83, 28.65)  | -5.55 (-59.17, 47.69)  | -16.59 (-80.51, 50.95)  |
| -4.91 (-50.90, 46.52)   | -0.98 (-48.58, 45.15)   | 32.72 (-29.13, 95.84)  | 15.38 (-27.29, 58.42)  | 21.26 (-61.11, 104.34)  | -17.31 (-54.30, 21.11)  | -11.56 (-48.39, 40.09)  | 9.81 (-67.01, 89.23)    | 8.92 (-52.78, 70.38)    | 18.07 (-61.80, 99.11)   | 11.88 (-29.06, 55.67)  | 9.93 (-47.71, 68.83)   | -1.30 (-64.17, 64.86)   |
| -4.74 (-60.00, 52.57)   | -1.11 (-61.76, 59.05)   | 32.83 (-34.79, 101.93) | 15.63 (-39.35, 68.57)  | 21.57 (-65.36, 109.38)  | -17.04 (-64.24, 31.13)  | -12.04 (-69.86, 45.68)  | 9.39 (-73.81, 91.30)    | 9.19 (-60.16, 76.01)    | 17.77 (-69.26, 104.16)  | 12.65 (-41.15, 64.43)  | 9.54 (-56.38, 75.66)   | -1.13 (-72.04, 72.30)   |
| Dog's bite              | 4.53 (-48.56, 43.16)    | 37.06 (-20.12, 94.46)  | 20.61 (-21.14, 53.27)  | 25.50 (-52.19, 102.86)  | -9.58 (-34.51, 14.95)   | -6.98 (-53.10, 34.94)   | 13.98 (-52.58, 79.83)   | 13.47 (-43.71, 69.31)   | 22.17 (-53.04, 95.71)   | 16.89 (-16.44, 47.63)  | 14.24 (-37.38, 63.99)  | 3.37 (-55.83, 63.59)    |
| -4.53 (-45.16, 48.56)   | Cryptic                 | 33.96 (-23.04, 93.97)  | 16.14 (-14.70, 51.70)  | 22.03 (-59.39, 103.87)  | -22.12 (-46.63, 1.73)   | -11.24 (-53.89, 39.05)  | 10.57 (-61.89, 87.94)   | 9.70 (-45.30, 68.93)    | 18.59 (-56.57, 96.99)   | 12.75 (-21.26, 54.72)  | 10.52 (-43.49, 67.55)  | -0.24 (-58.86, 61.48)   |
| -37.06 (-44.46, 20.12)  | -33.96 (-93.97, 23.04)  | house, basement gr     | -17.47 (-71.14, 35.45) | -12.01 (-100.86, 77.23) | -5.04 (-97.82, -1.73)   | -44.34 (-101.74, 13.09) | -23.06 (-100.43, 59.89) | -23.67 (-91.87, 45.95)  | -15.43 (-101.63, 71.34) | -20.70 (-73.83, 32.28) | -23.29 (-89.19, 42.18) | -33.84 (-102.21, 37.20) |
| -26.61 (-53.27, 21.14)  | -16.14 (-51.70, 14.70)  | 17.47 (-35.45, 71.14)  | User                   | 5.75 (-69.66, 83.06)    | -32.21 (-48.76, -14.99) | -27.17 (-66.13, 13.89)  | -6.06 (-74.23, 64.81)   | -5.97 (-59.51, 47.66)   | 2.29 (-71.25, 76.19)    | -3.73 (-26.00, 19.54)  | -6.09 (-53.37, 43.88)  | -16.42 (-72.94, 42.22)  |
| -26.50 (-102.96, 52.19) | -22.03 (-103.87, 58.39) | 12.01 (-77.23, 100.86) | -5.75 (-43.06, 69.66)  | Negative                | -38.05 (-113.06, 36.44) | -32.74 (-115.57, 49.29) | -11.87 (-109.91, 85.60) | -11.70 (-102.69, 78.49) | -3.32 (-74.03, 64.08)   | -8.71 (-79.51, 61.27)  | -11.66 (-94.08, 72.82) | -22.19 (-111.94, 69.08) |
| 9.59 (-14.95, 34.53)    | 22.12 (-1.73, 46.63)    | 50.04 (1.73, 97.82)    | 32.21 (4.89, 48.76)    | 38.05 (-36.44, 113.86)  | Pseudo                  | 5.60 (-27.57, 37.90)    | 26.64 (-59.35, 94.56)   | 26.14 (-21.64, 73.85)   | 34.62 (-36.56, 106.68)  | 28.24 (-1.97, 58.52)   | 25.79 (-24.25, 74.93)  | 16.00 (-34.63, 66.34)   |
| 6.98 (-34.94, 53.10)    | 11.24 (-39.05, 53.89)   | 44.34 (-13.09, 101.74) | 27.17 (-13.85, 68.13)  | 32.74 (-49.29, 115.57)  | -5.60 (-37.20, 27.57)   | Phonics                 | 21.27 (-59.85, 94.45)   | 20.59 (-38.91, 77.54)   | 28.98 (-45.15, 109.88)  | 23.84 (-14.70, 63.62)  | 21.50 (-34.48, 77.36)  | 10.87 (-49.60, 72.12)   |
| -13.98 (-79.83, 32.58)  | -10.57 (-87.94, 61.89)  | 23.06 (-58.88, 104.43) | 6.06 (-64.81, 74.29)   | 11.87 (-85.66, 109.91)  | -26.64 (-94.56, 39.35)  | -21.27 (-94.45, 50.85)  | Question                | -0.99 (-82.58, 80.53)   | 7.93 (-86.56, 101.61)   | 2.64 (-69.52, 67.51)   | 0.24 (-76.53, 76.66)   | -10.94 (-96.28, 74.37)  |
| -13.47 (-68.31, 43.71)  | -9.70 (-68.93, 45.30)   | 23.67 (-43.98, 91.87)  | 5.97 (-47.66, 59.51)   | 11.70 (-76.49, 102.89)  | -26.14 (-73.85, 21.84)  | -20.99 (-77.64, 36.91)  | 0.99 (-80.53, 82.50)    | Shuttle                 | 8.95 (-77.81, 95.52)    | 3.34 (-49.41, 55.96)   | 0.60 (-45.13, 66.60)   | -10.23 (-80.40, 60.74)  |
| -22.17 (-45.71, 53.04)  | -18.98 (-96.99, 56.57)  | 15.43 (-71.34, 101.63) | -2.28 (-76.19, 71.25)  | 33.2 (-64.08, 74.03)    | -34.62 (-106.66, 36.85) | -26.98 (-109.88, 48.15) | -7.93 (-101.61, 86.56)  | -8.95 (-95.52, 77.81)   | Success                 | -5.41 (-73.59, 62.75)  | -8.07 (-88.35, 71.56)  | -10.04 (-108.64, 69.73) |
| -16.88 (-47.83, 16.44)  | -12.75 (-54.72, 21.26)  | 20.70 (-32.26, 73.83)  | 3.73 (-19.54, 26.00)   | 8.71 (-61.27, 79.51)    | -23.84 (-56.52, 1.97)   | -23.84 (-63.62, 14.78)  | -2.64 (-67.51, 63.52)   | -3.34 (-55.96, 49.11)   | 5.41 (-62.75, 73.59)    | Therapeutic            | -2.49 (-46.23, 40.75)  | -13.53 (-49.10, 44.29)  |
| -14.26 (-43.88, 37.38)  | -10.62 (-67.56, 43.49)  | 23.29 (-42.18, 89.19)  | 6.09 (-43.88, 53.37)   | 11.66 (-72.82, 94.09)   | -25.78 (-74.83, 24.25)  | -21.50 (-77.35, 34.48)  | -0.24 (-76.66, 75.53)   | -0.60 (-66.60, 65.13)   | 8.07 (-71.56, 88.55)    | 2.49 (-46.75, 46.23)   | Threat Exposure Code   | -10.70 (-78.76, 60.83)  |
| -3.37 (-65.59, 55.83)   | 0.24 (-61.46, 58.86)    | 33.84 (-37.30, 103.21) | 16.42 (-42.22, 72.94)  | 22.19 (-69.08, 113.94)  | -16.00 (-68.34, 34.63)  | -10.87 (-72.12, 49.60)  | 10.94 (-74.37, 96.28)   | 10.23 (-60.74, 80.40)   | 19.04 (-69.72, 108.64)  | 13.52 (-44.29, 69.10)  | 10.70 (-60.83, 78.76)  | Zinc                    |

### Inconsistency Factors

| Cycle                                                  | Median (95% CI)       |
|--------------------------------------------------------|-----------------------|
| Aloe, Amlexanox, Placebo, Triamcinolone                | 0.50 (-14.31, 31.47)  |
| Aloe, Amlexanox, Dexamethasone, Placebo, Triamcinolone | 0.05 (-25.55, 26.18)  |
| Aloe, Doxycycline, Placebo, Triamcinolone              | -0.38 (-32.56, 15.35) |
| Aloe, Amlexanox, Glycyrrhiza, Placebo, Triamcinolone   | 1.70 (-9.46, 41.74)   |
| Aloe, Amlexanox, Laser, Placebo, Triamcinolone         | -0.10 (-22.51, 22.79) |
| Aloe, Placebo, Triamcinolone                           | -0.13 (-27.69, 24.14) |
| Aloe, Placebo, Triamcinolone                           | -0.13 (-27.69, 24.14) |
| Aloe, Placebo, Triamcinolone                           | -0.13 (-27.69, 24.14) |
| Amlexanox, Laser, Triamcinolone                        | 0.01 (-25.66, 20.43)  |

### Variance Calculation

| Parameter                         | Median (95% CI)      |
|-----------------------------------|----------------------|
| Random Effects Standard Deviation | 23.41 (17.97, 32.05) |
| Inconsistency Standard Deviation  | 6.74 (0.15, 37.28)   |

## Convergence Diagnostics

Convergence is assessed using the Brooks-Gelman-Rubin method. This method compares within-chain and between-chain variance to calculate the Potential Scale Reduction Factor (PSRF). A PSRF close to one indicates approximate convergence has been reached.

| Parameter                                            | PSRF |
|------------------------------------------------------|------|
| d.Allicin.Placebo                                    | 1.00 |
| d.Aloe.Triamcinolone                                 | 1.00 |
| d.Amlexanox.Dexamethasone                            | 1.00 |
| d.Amlexanox.Glycyrrhiza                              | 1.01 |
| d.Benzydamine.Doxyeycline                            | 1.00 |
| d.Benzydamine.Quercetin                              | 1.00 |
| d.Chlorhexidine.Nacetylsteyne                        | 1.00 |
| d.Chlorhexidine.Sucralfate                           | 1.00 |
| d.Glycyrrhiza.Laser                                  | 1.01 |
| d.Placebo.Aloe                                       | 1.00 |
| d.Placebo.Berberinegelatin                           | 1.00 |
| d.Placebo.Chitosan                                   | 1.00 |
| d.Placebo.Diosmectite                                | 1.00 |
| d.Placebo.Insulinliposomalgel                        | 1.00 |
| d.placebo.Probiotics                                 | 1.00 |
| d.Placebo.Silvernitrate                              | 1.00 |
| d.Placebo.Zinc                                       | 1.15 |
| d.Triamcinolone.Amlexanox                            | 1.01 |
| d.Triamcinolone.Benzydamine                          | 1.00 |
| d.Triamcinolone.Chlorhexidine                        | 1.00 |
| d.Triamcinolone.Curcumin                             | 1.00 |
| d.Triamcinolone.TriesterGlycerolOxide                | 1.00 |
| w.Aloe.Placebo.Amlexanox.Triamcinolone               | 1.01 |
| w.Aloe.Placebo.Dexamethasone.Amlexanox.Triamcinolone | 1.01 |
| w.Aloe.Placebo.Doxycline.Triamcinolone               | 1.01 |
| w.Aloe.Placebo.Glycyrrhiza.Amlexanox.Triamcinolone   | 1.02 |
| w.Aloe.Placebo.Laser.Amlexanox.Triamcinolone         | 1.03 |
| w.Aloe.Placebo.Triamcinolone                         | 1.01 |
| w.Aloe.Placebo.Triamcinolone                         | 1.01 |
| w.Aloe.Placebo.Triamcinolone                         | 1.01 |
| w.Amlexanox.Laser.Triamcinolone                      | 1.01 |
| sd.d                                                 | 1.00 |
| sd.w                                                 | 1.03 |

Number of chains : 4  
Tuning iterations : 20,000  
Simulation iterations : 50,000  
Thinning interval : 10  
Inference samples : 10,000  
Variance scaling factor : 2.5

### 3. Node-splitting analysis

#### Node-splitting analysis of inconsistency

Inconsistency between direct and indirect estimates was estimated in the Node-Splitting Model. When P values is above 0.05 in a comparison, there is evidence of statistical inconsistency.

| Name                       | Direct Effect           | Indirect Effect        | Overall                 | P-Value |
|----------------------------|-------------------------|------------------------|-------------------------|---------|
| Aloe, Triamcinolone        | 10.75 (-40.60, 60.29)   | 22.21 (-21.04, 64.30)  | 16.02 (-18.38, 51.47)   | 0.72    |
| Amlexanox, Dexamethasone   | -0.12 (-48.39, 48.02)   | -11.31 (-64.58, 41.28) | -5.15 (-39.53, 29.62)   | 0.74    |
| Amlexanox, Glycyrrhiza     | -16.91 (-67.12, 32.29)  | -3.20 (-38.03, 31.48)  | -2.07 (-31.34, 26.50)   | 0.66    |
| Amlexanox, Laser           | 8.18 (-43.87, 59.96)    | 7.79 (-17.34, 33.33)   | 8.95 (-14.74, 31.73)    | 0.99    |
| Amlexanox, Placebo         | -33.36 (-55.45, -12.01) | -7.72 (-39.82, 22.76)  | -23.26 (-42.15, -4.15)  | 0.17    |
| Amlexanox, Triamcinolone   | 42.21 (-4.58, 87.65)    | -7.76 (-33.96, 19.47)  | 4.98 (-18.10, 29.39)    | 0.07    |
| Benzydamine, Doxycycline   | -0.13 (-49.50, 48.84)   | -18.79 (-71.52, 36.16) | -7.07 (-48.88, 35.26)   | 0.6     |
| Benzydamine, Placebo       | -12.10 (-60.76, 37.64)  | -20.69 (-67.17, 25.07) | -17.16 (-57.33, 24.03)  | 0.8     |
| Benzydamine, Triamcinolone | -0.28 (-49.39, 48.65)   | 24.33 (-23.53, 73.33)  | 11.21 (-29.12, 52.26)   | 0.46    |
| Dexamethasone, Placebo     | -13.05 (-63.34, 36.72)  | -24.48 (-77.06, 27.32) | -18.31 (-52.81, 16.30)  | 0.75    |
| Doxycycline, Triamcinolone | 0.03 (-49.01, 48.53)    | 23.59 (-8.72, 56.12)   | 18.39 (-9.26, 46.67)    | 0.4     |
| Glycyrrhiza, Laser         | 24.22 (-25.07, 74.40)   | 8.48 (-20.95, 38.30)   | 11.08 (-16.23, 38.16)   | 0.57    |
| Laser, Placebo             | -34.75 (-53.20, -16.15) | -30.79 (-59.83, -1.68) | -32.21 (-48.08, -16.39) | 0.8     |
| Laser, Triamcinolone       | -5.25 (-35.21, 24.96)   | -7.16 (-36.01, 22.01)  | -3.74 (-23.22, 16.50)   | 0.92    |
| Placebo, Triamcinolone     | 18.98 (-5.22, 43.91)    | 44.45 (16.19, 73.39)   | 28.45 (10.36, 46.76)    | 0.18    |

### 4. Network structure

#### Network structure of sensitivity analysis

46 RCTs involving 23 local interventions were included in the sensitivity analysis considering the symptom-reducing effect.

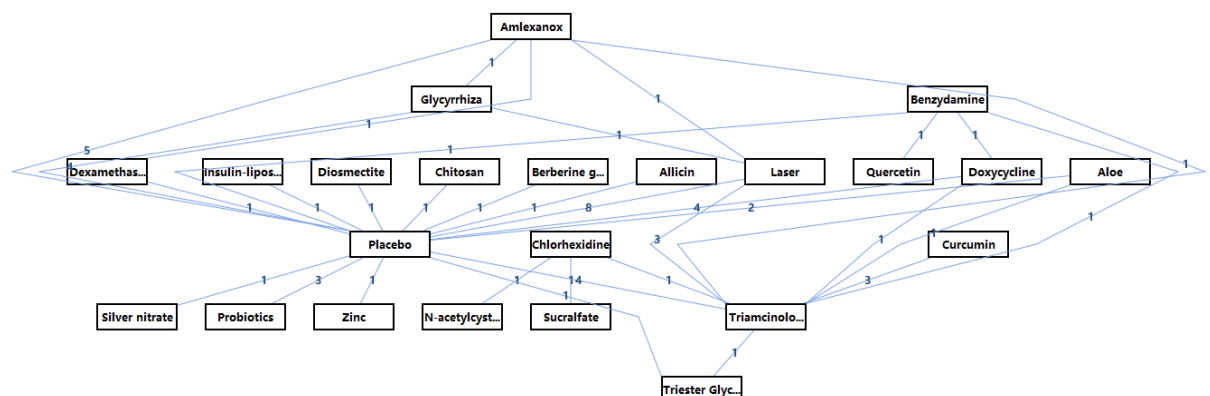

## 5. Pairwise meta-analysis

### Pairwise meta-analysis of symptom-reducing effect

Symptom-reducing effect were measured by mean difference (MD) and 95% confidence interval (CI).

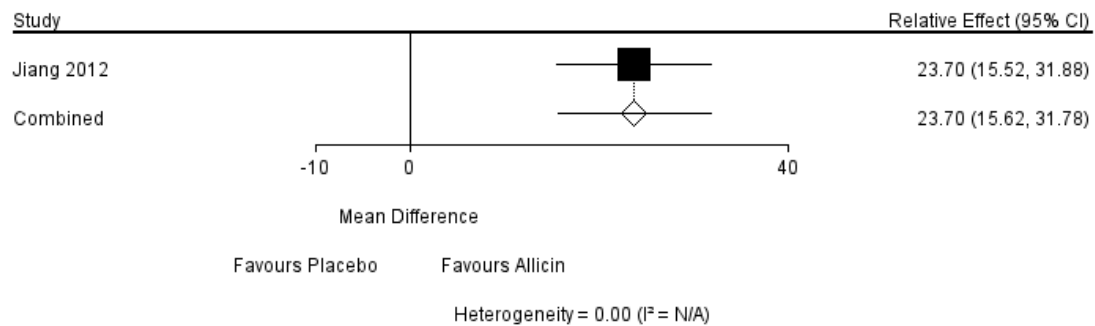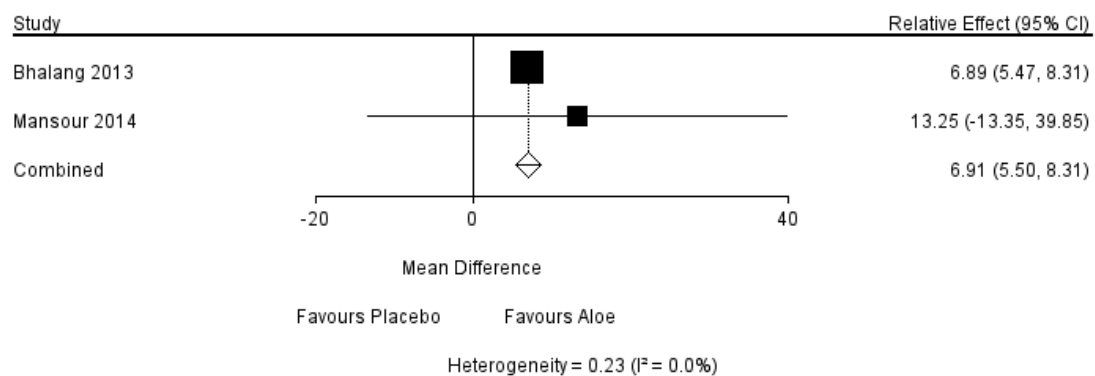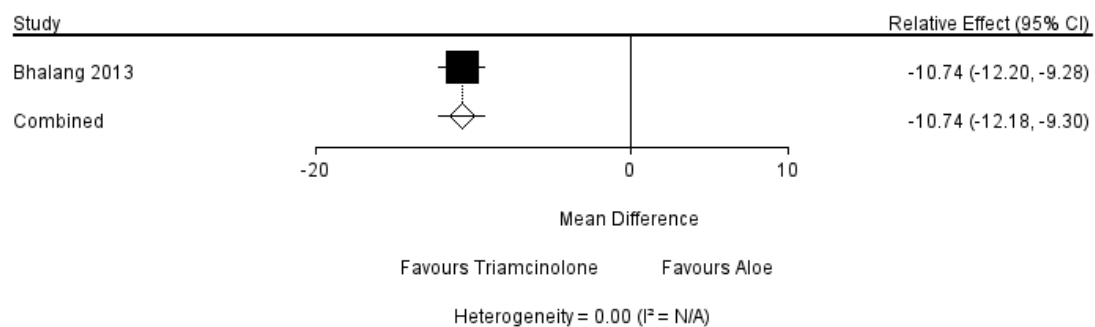

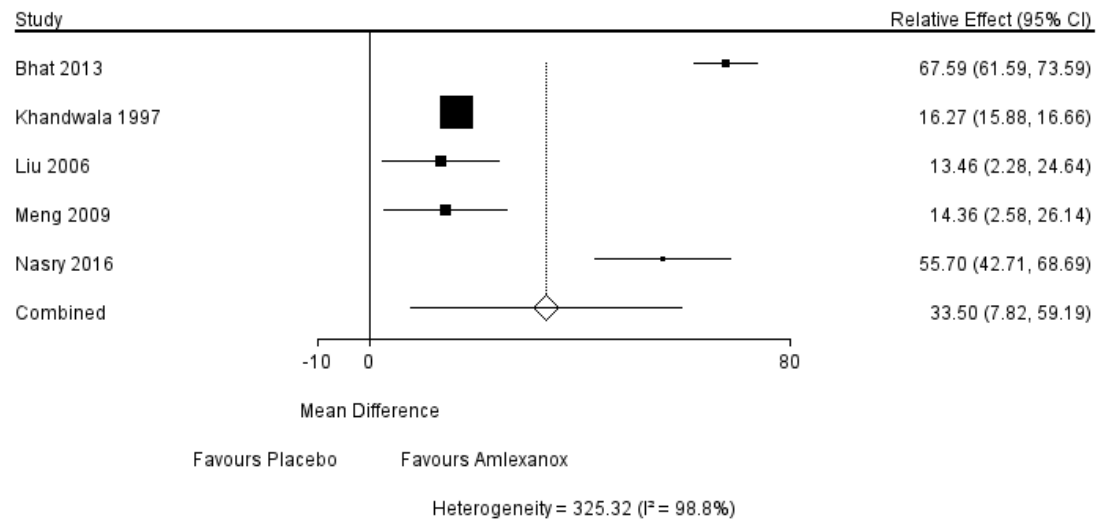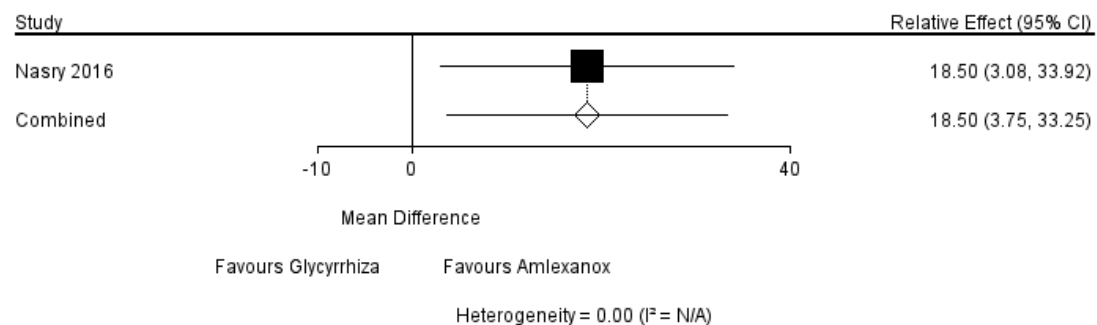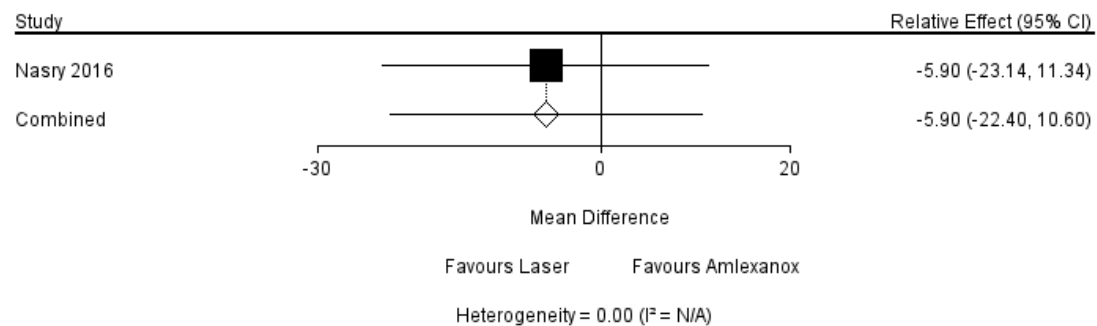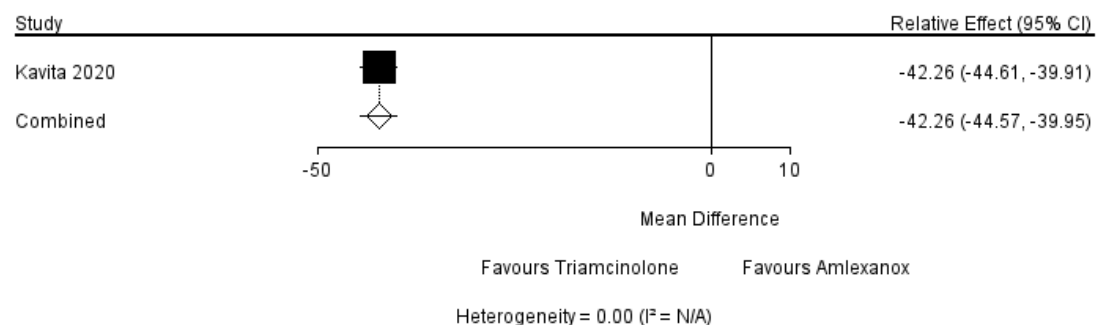

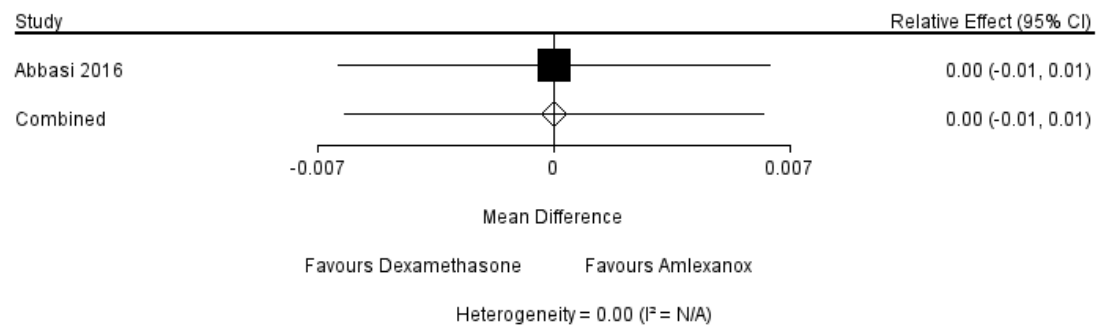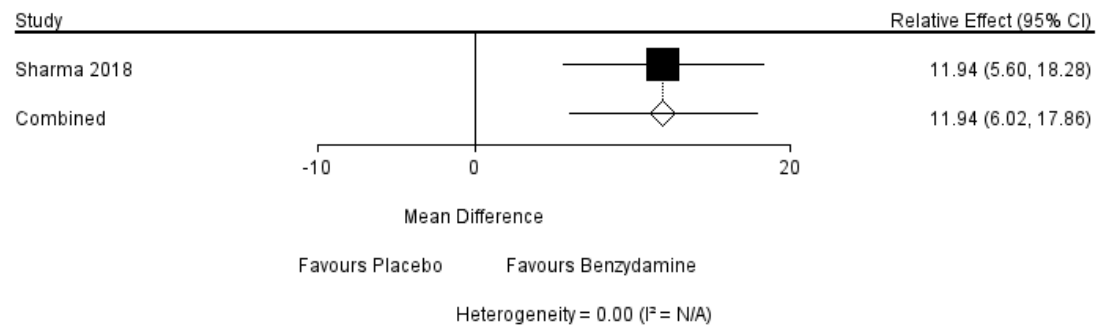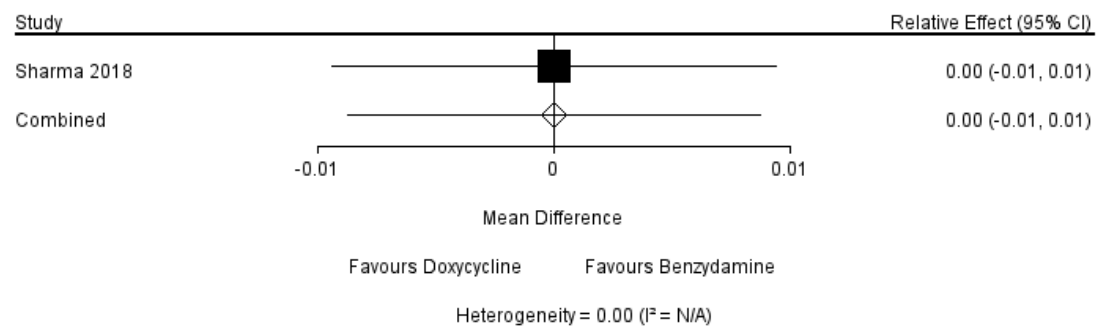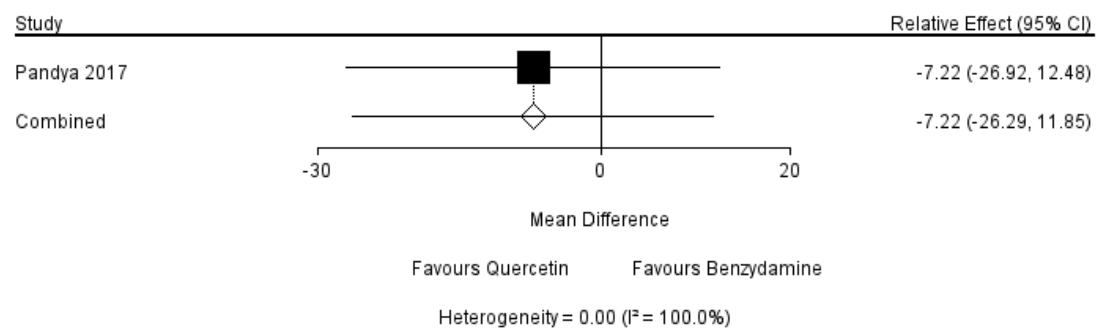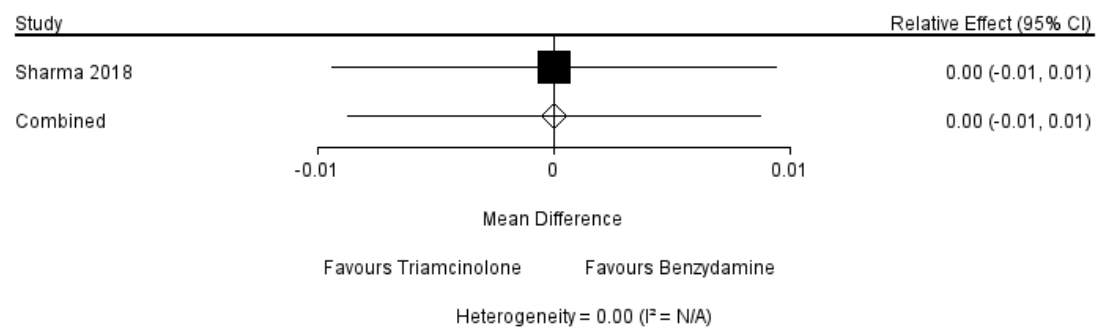



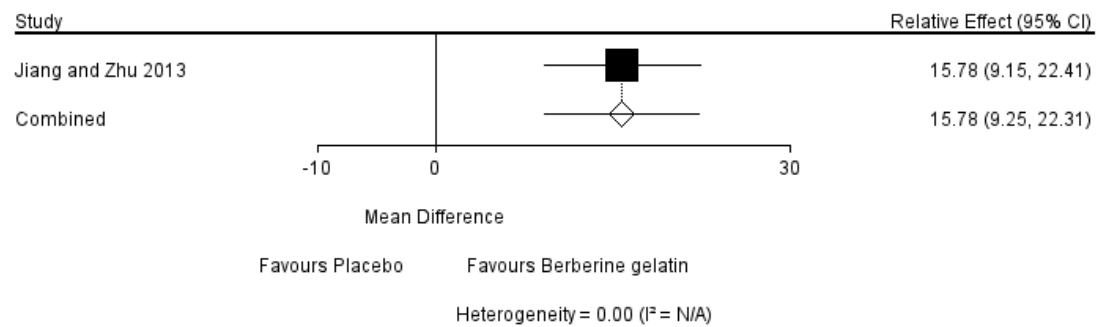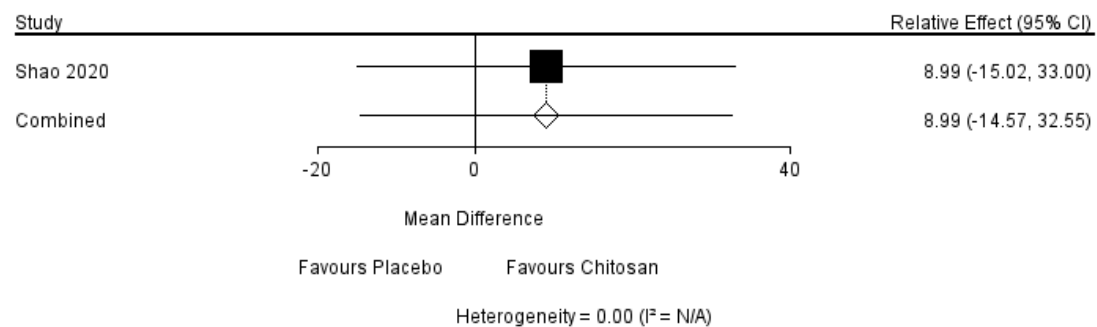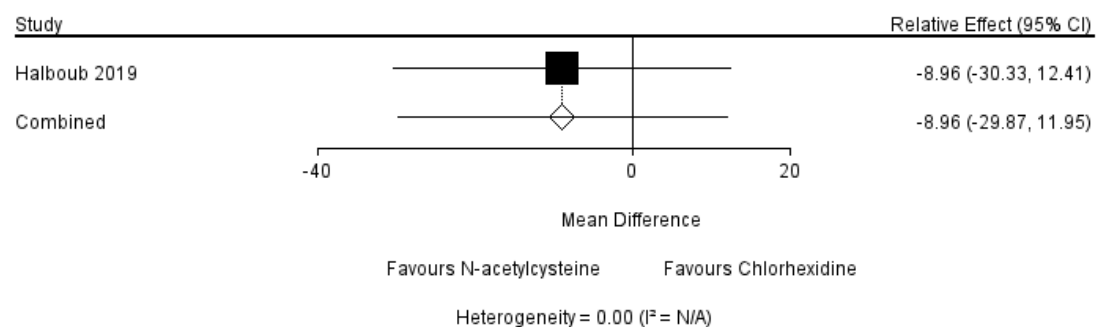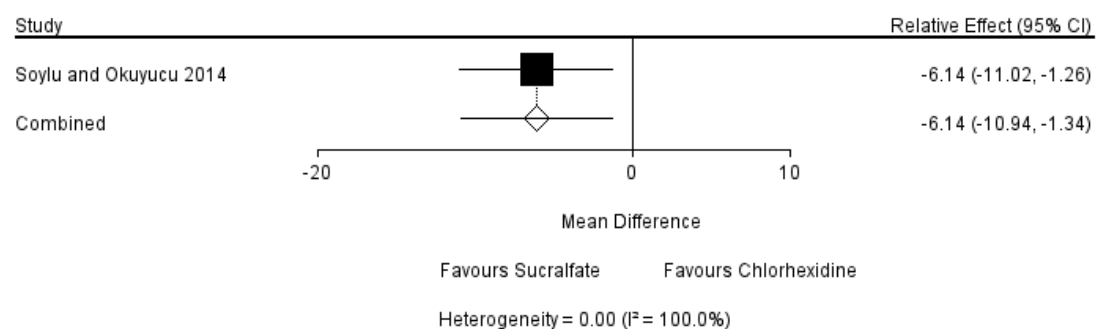

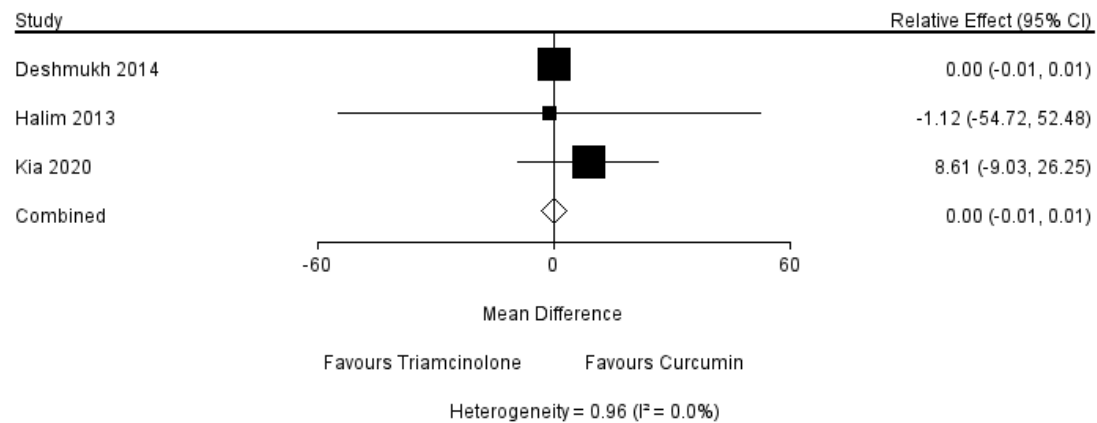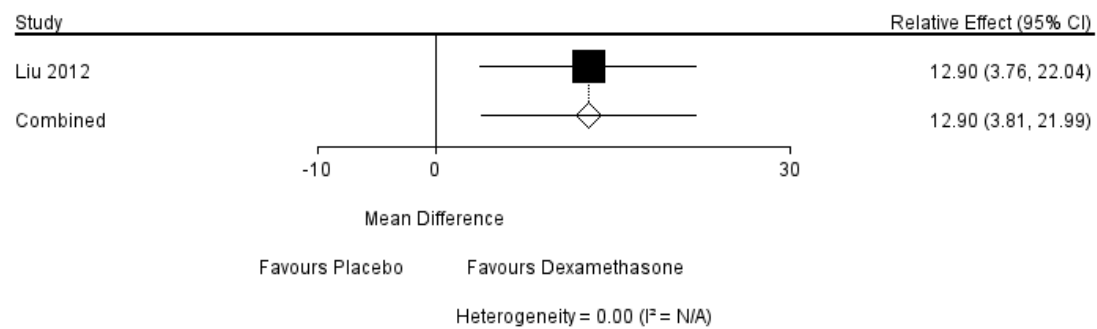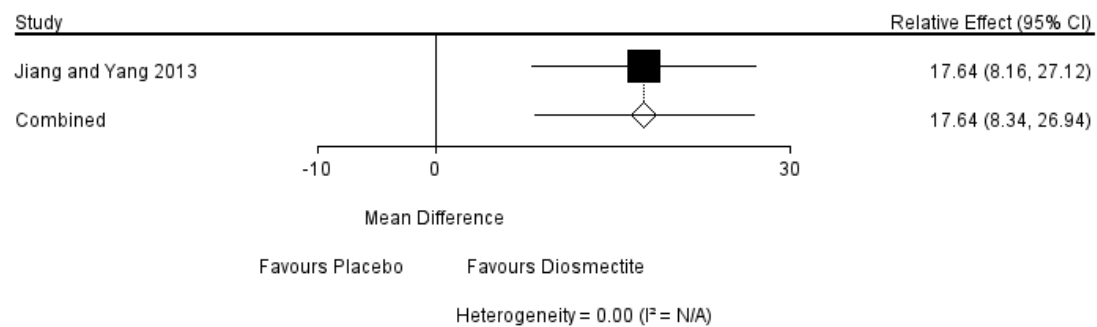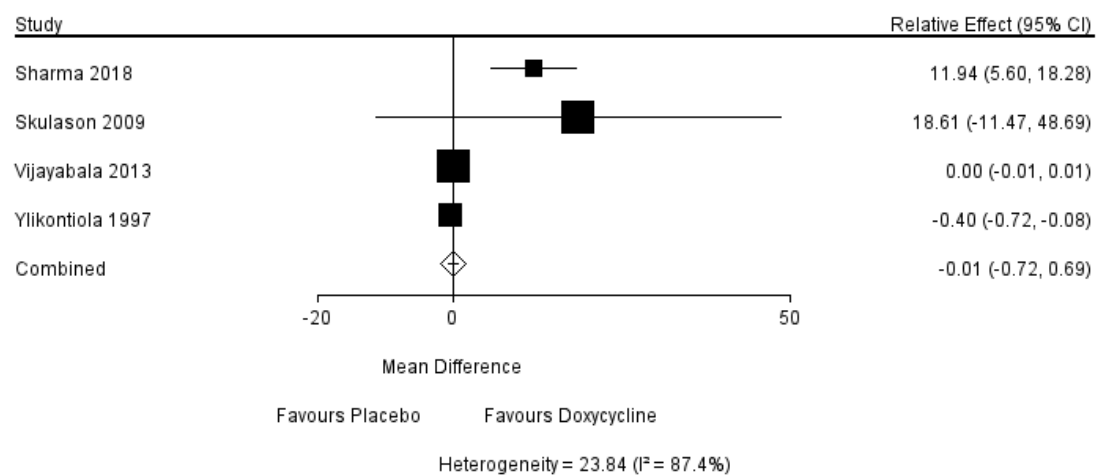

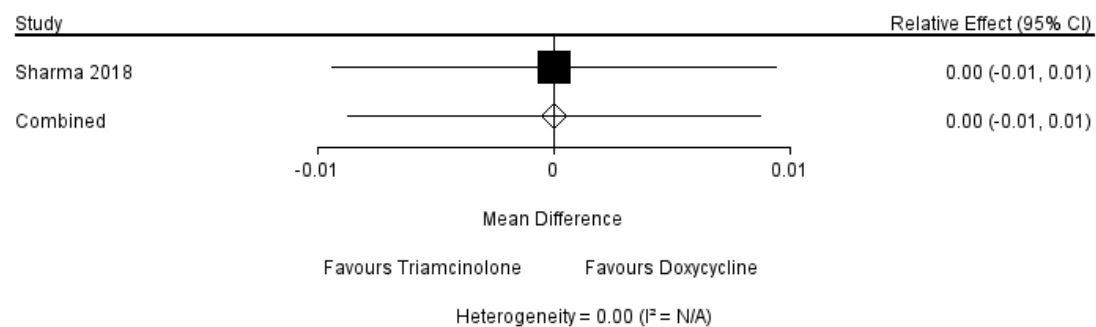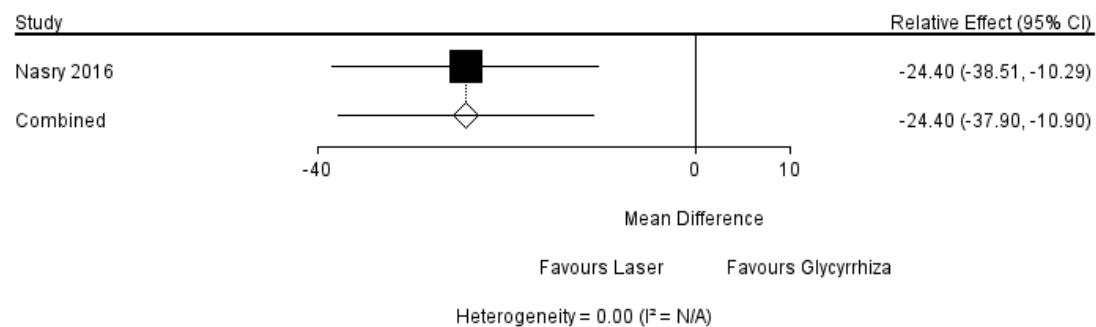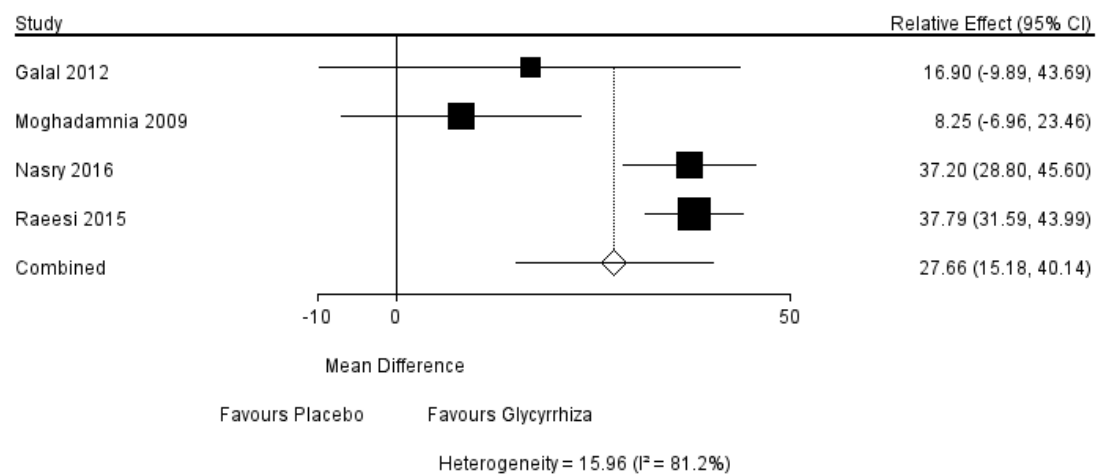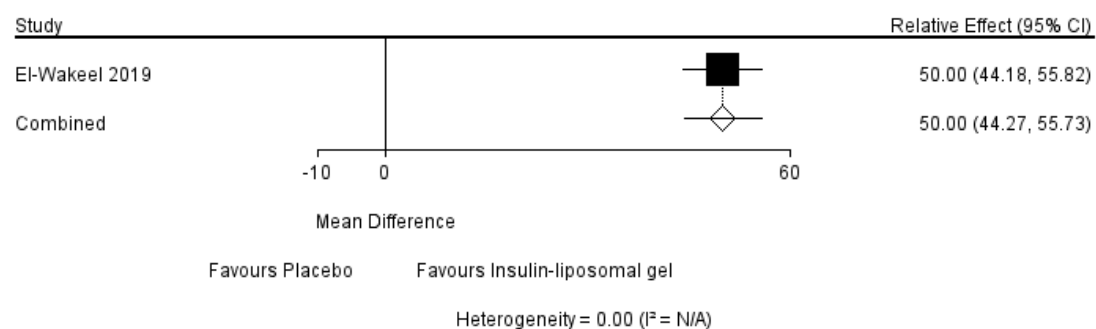

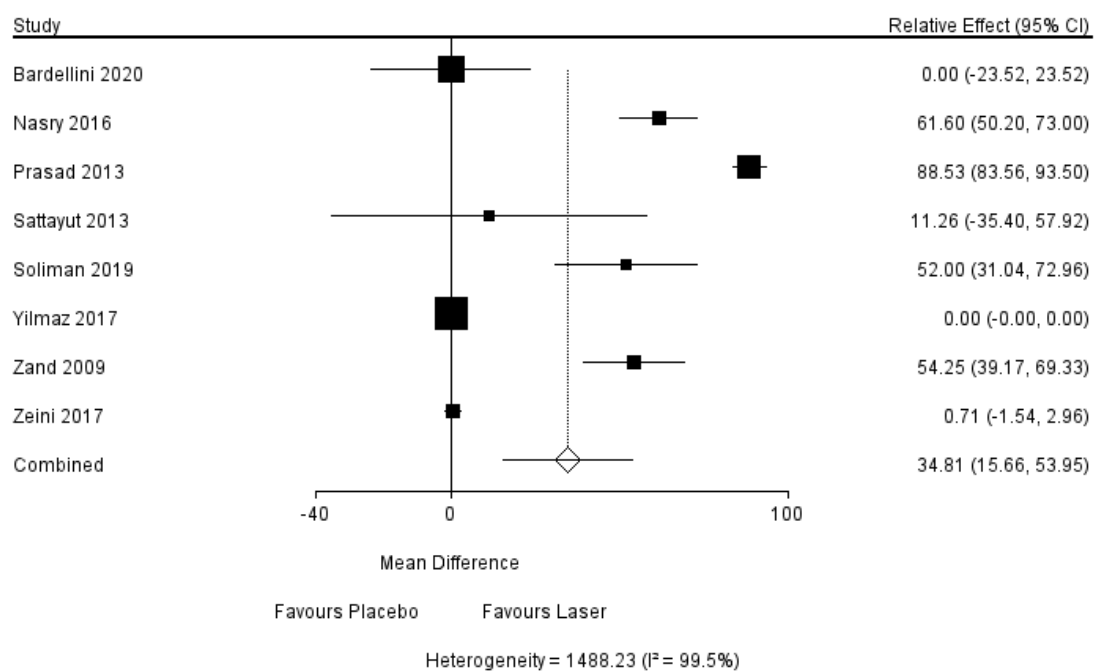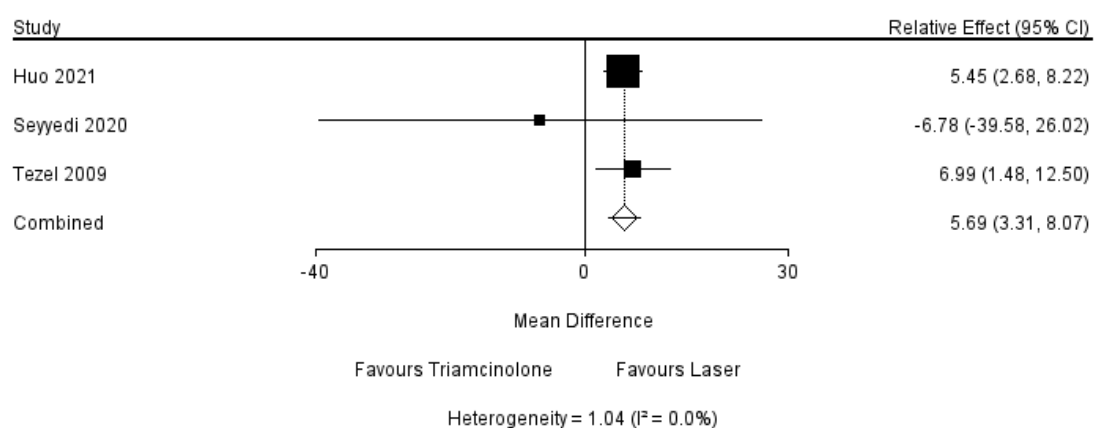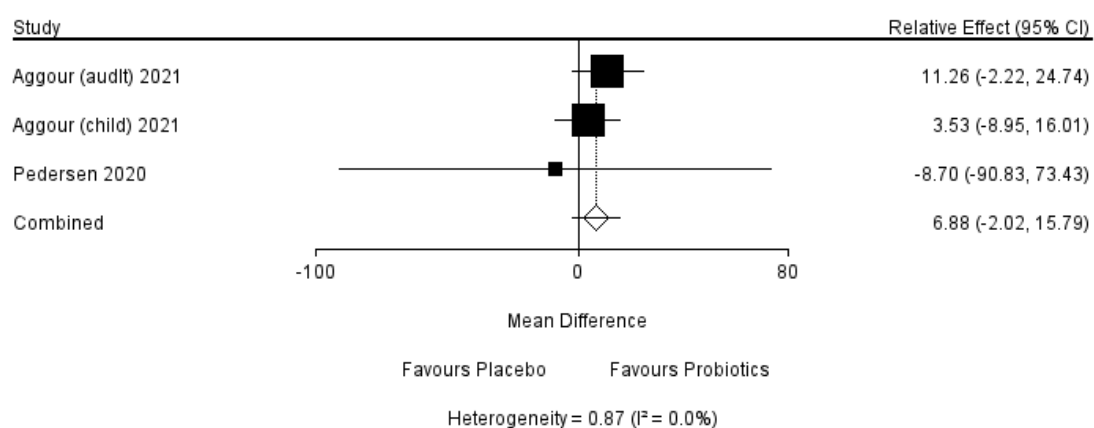

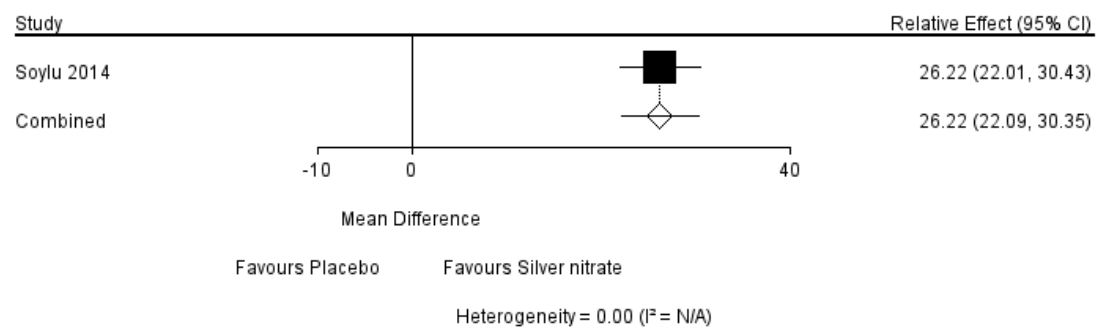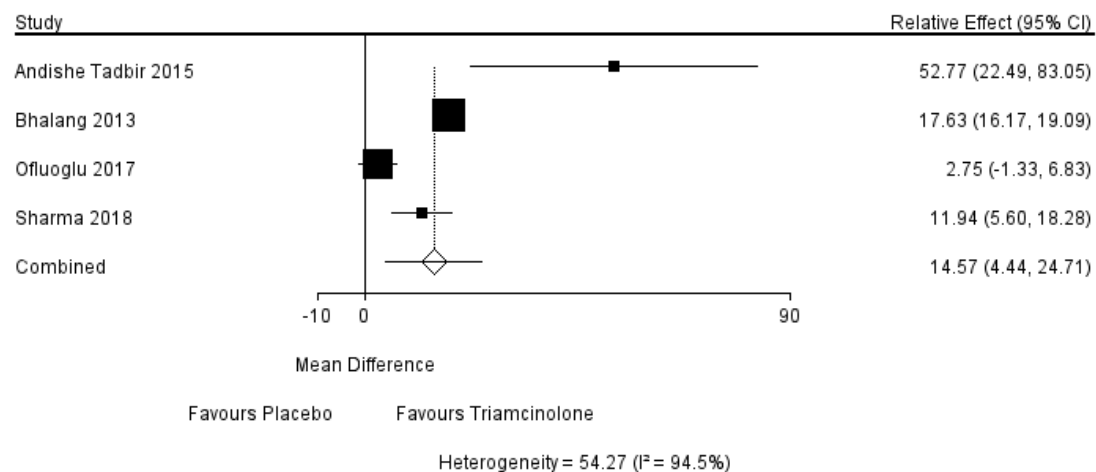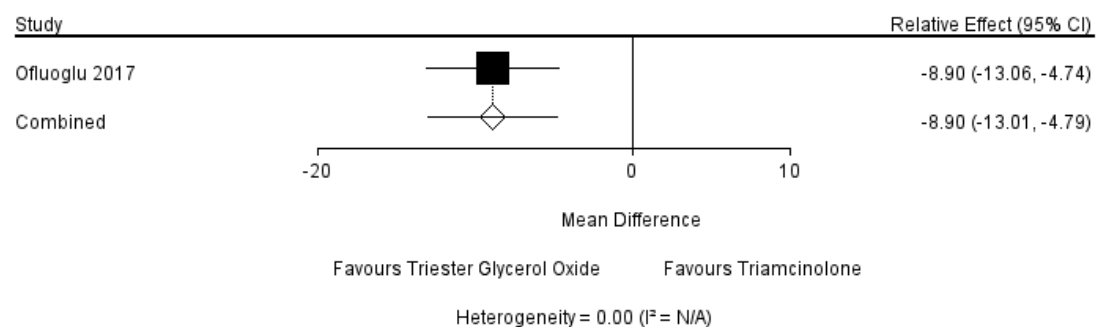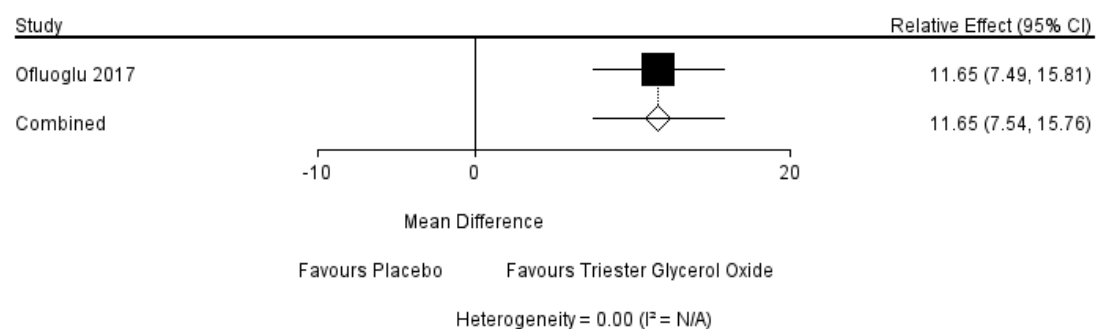

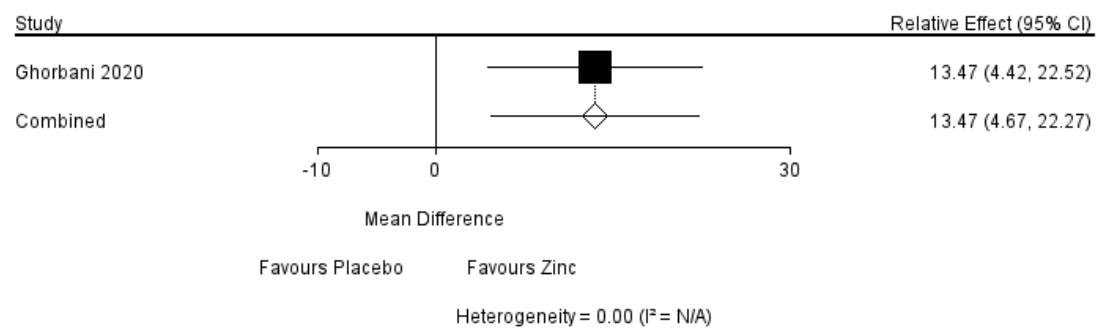

| Comparison                 | NO. of included study | Heterogeneity (I <sup>2</sup> ) | Combined effect [SMD (95%CI)] |
|----------------------------|-----------------------|---------------------------------|-------------------------------|
| Allicin vs                 |                       |                                 |                               |
| Placebo                    | 1                     | NA                              | 23.70 (15.62, 31.78)          |
| Aloe vs                    |                       |                                 |                               |
| Placebo                    | 2                     | 0%                              | 6.91 (5.50, 8.31)             |
| Triamcinolone              | 1                     | NA                              | -10.74 (-12.18, -9.30)        |
| Amlexanox vs               |                       |                                 |                               |
| Placebo                    | 5                     | 99%                             | 33.50 (7.82, 59.19)           |
| Glycyrrhiza                | 1                     | NA                              | 18.50 (3.75, 33.25)           |
| Laser                      | 1                     | NA                              | -5.90 (-22.40, 10.60)         |
| Triamcinolone              | 1                     | NA                              | -42.26 (-44.57, -39.95)       |
| Dexamethasone              | 1                     | NA                              | 0.00 (-0.01, 0.01)            |
| Benzydamine vs             |                       |                                 |                               |
| Placebo                    | 1                     | NA                              | 11.94 (6.02, 17.86)           |
| Doxycycline                | 1                     | NA                              | 0.00 (-0.01, 0.01)            |
| Quercetin                  | 1                     | NA                              | -7.22 (-26.29, 11.85)         |
| Triamcinolone              | 1                     | NA                              | 0.00 (-0.01, 0.01)            |
| Berberine gelatin vs       |                       |                                 |                               |
| Placebo                    | 1                     | NA                              | 15.78 (9.25, 22.31)           |
| Chitosan vs                |                       |                                 |                               |
| Placebo                    | 1                     | NA                              | 8.99 (-14.57, 32.55)          |
| Chlorhexidine vs           |                       |                                 |                               |
| N-acetylcysteine           | 1                     | NA                              | -8.96 (-29.87, 11.95)         |
| Sucralfate                 | 1                     | NA                              | -6.14 (-10.94, -1.34)         |
| Curcumin vs                |                       |                                 |                               |
| Triamcinolone              | 3                     | 0%                              | 0.00 (-0.01, 0.01)            |
| Dexamethasone vs           |                       |                                 |                               |
| Placebo                    | 1                     | NA                              | 12.90 (3.81, 21.99)           |
| Diosmectite vs             |                       |                                 |                               |
| Placebo                    | 1                     | NA                              | 17.64 (8.34, 26.94)           |
| Doxycycline vs             |                       |                                 |                               |
| Placebo                    | 4                     | 87.4%                           | -0.01 (-0.72, 0.69)           |
| Triamcinolone              | 1                     | NA                              | 0.00 (-0.01, 0.01)            |
| Glycyrrhiza vs             |                       |                                 |                               |
| Laser                      | 1                     | NA                              | -24.40 (-37.90, -10.90)       |
| Placebo                    | 4                     | 81.2%                           | 27.66 (15.18, 40.14)          |
| Insulin-liposomal gel vs   |                       |                                 |                               |
| Placebo                    | 1                     | NA                              | 50.00 (44.27, 55.73)          |
| Laser vs                   |                       |                                 |                               |
| Placebo                    | 8                     | 99.5%                           | 34.81 (15.66, 53.95)          |
| Triamcinolone              | 3                     | 0%                              | 6.99 (1.85, 12.13)            |
| Probiotics vs              |                       |                                 |                               |
| Placebo                    | 3                     | 0%                              | 6.88 (-2.02, 15.79)           |
| Silver nitrate vs          |                       |                                 |                               |
| Placebo                    | 1                     | NA                              | 26.22 (26.09, 30.35)          |
| Triamcinolone vs           |                       |                                 |                               |
| Placebo                    | 4                     | 94.5%                           | 14.57 (4.44, 24.71)           |
| Triester Glycerol Oxide    | 1                     | NA                              | -8.90 (-13.01, -4.79)         |
| Triester Glycerol Oxide vs |                       |                                 |                               |
| Placebo                    | 1                     | NA                              | 11.65 (7.54, 15.76)           |
| Zinc vs                    |                       |                                 |                               |
| Placebo                    | 1                     | NA                              | 13.47 (4.67, 22.27)           |

MD, mean difference; CI, confidence interval; NA, not applicable.

## 6. Subgroup Discussion

The 56 RCTs studied for the symptom-reducing effect had different durations of local intervention and were examined at different times during the trial. The size-reducing effect is discussed separately according to the different examination times.

### Day 0

#### 1. Consistency Model

##### 1.1 Summary estimates

|                         |                        |                          |                         |
|-------------------------|------------------------|--------------------------|-------------------------|
| Aloe                    | 60.01 (-45.60, 159.40) | -10.79 (-107.87, 83.10)  | 5.38 (-94.80, 102.16)   |
| -60.01 (-159.40, 45.60) | Laser                  | -70.96 (-115.42, -26.81) | -54.41 (-133.09, 20.80) |
| 10.79 (-83.10, 107.87)  | 70.96 (26.81, 115.42)  | Placebo                  | 16.74 (-60.78, 92.32)   |
| -5.38 (-102.16, 94.80)  | 54.41 (-20.80, 133.09) | -16.74 (-92.32, 60.78)   | Triamcinolone           |

##### 1.2 Rank probability(Rank 1 is best, rank N is worst)

| Drug          | Rank 1 | Rank 2 | Rank 3 | Rank 4 |
|---------------|--------|--------|--------|--------|
| Aloe          | 0.1    | 0.3    | 0.28   | 0.33   |
| Laser         | 0.85   | 0.12   | 0.03   | 0      |
| Placebo       | 0      | 0.18   | 0.35   | 0.47   |
| Triamcinolone | 0.05   | 0.41   | 0.35   | 0.2    |

##### 1.3 Consistency check

| Parameter                         | Median (95% CI)      |
|-----------------------------------|----------------------|
| Random Effects Standard Deviation | 44.73 (25.24, 86.33) |

##### 1.4 Convergence Diagnostics

| Parameter               | PSRF | Number of chains         | : | 4      |
|-------------------------|------|--------------------------|---|--------|
| d.Placebo.Aloe          | 1.00 | Tuning iterations        | : | 20,000 |
| d.Placebo.Laser         | 1.00 | Simulation iterations    | : | 50,000 |
| d.Placebo.Triamcinolone | 1.00 | Thinning interval        | : | 10     |
| sd.d                    | 1.00 | Inference samples        | : | 10,000 |
|                         |      | Variance scaling factor: |   | 2.5    |

#### 2.Inconsistency Model

##### 2.1 Summary estimates

|                         |                        |                          |                         |
|-------------------------|------------------------|--------------------------|-------------------------|
| Aloe                    | 63.25 (-46.01, 172.29) | -8.69 (-111.98, 93.09)   | 2.84 (-99.39, 109.45)   |
| -63.25 (-172.29, 46.01) | Laser                  | -71.93 (-117.97, -24.56) | -51.07 (-139.54, 34.18) |
| 8.69 (-93.09, 111.98)   | 71.93 (24.56, 117.97)  | Placebo                  | 27.06 (-112.79, 179.88) |
| -2.84 (-109.45, 99.39)  | 51.07 (-34.18, 139.54) | -27.06 (-179.88, 112.79) | Triamcinolone           |

##### 2.2 Inconsistency Factors

| Cycle                         | Median (95% CI)      |
|-------------------------------|----------------------|
| Laser, Placebo, Triamcinolone | 4.62 (-68.95, 94.10) |

##### 2.3 Variance Calculation

| Parameter                         | Median (95% CI)      |
|-----------------------------------|----------------------|
| Random Effects Standard Deviation | 46.49 (25.57, 88.78) |
| Inconsistency Standard Deviation  | 41.76 (1.80, 92.60)  |



## 2.4 Convergence Diagnostics

| Parameter                     | PSRF | Number of chains : 4           |
|-------------------------------|------|--------------------------------|
| d.Aloe.Placebo                | 1.00 | Tuning iterations : 20,000     |
| d.Laser.Triamcinolone         | 1.00 | Simulation iterations : 50,000 |
| d.Placebo.Laser               | 1.00 | Thinning interval : 10         |
| w.Laser.Placebo.Triamcinolone | 1.00 | Inference samples : 10,000     |
| sd.d                          | 1.00 | Variance scaling factor: 2.5   |
| sd.w                          | 1.00 |                                |

## 3. Node-splitting analysis

| Name                   | Direct Effect            | Indirect Effect          | Overall                  | P-Value |
|------------------------|--------------------------|--------------------------|--------------------------|---------|
| Laser, Placebo         | -73.56 (-125.70, -22.42) | -43.34 (-201.05, 115.96) | -70.96 (-115.42, -26.81) | 0.67    |
| Laser, Triamcinolone   | -40.77 (-154.72, 70.35)  | -72.62 (-197.56, 52.79)  | -54.41 (-133.09, 20.80)  | 0.66    |
| Placebo, Triamcinolone | 2.43 (-112.79, 118.03)   | 34.31 (-92.49, 158.95)   | 16.74 (-60.78, 92.32)    | 0.66    |

## 4. Network structure

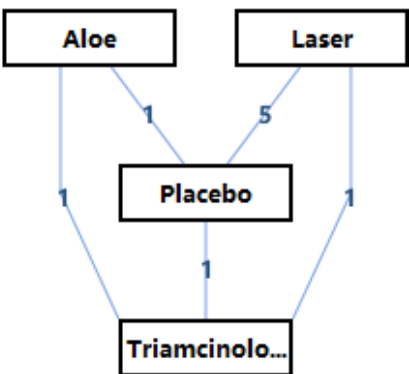

## Day 1

### 1. Consistency Model

#### 1.1 Summary estimates

|                         |                         |                         |                        |                        |                          |                          |                         |
|-------------------------|-------------------------|-------------------------|------------------------|------------------------|--------------------------|--------------------------|-------------------------|
| Curcumin                | -0.37 (-96.16, 97.91)   | -23.52 (-121.32, 77.32) | 35.77 (-75.63, 148.25) | 44.11 (-24.98, 111.65) | -26.08 (-106.28, 55.32)  | -10.56 (-120.97, 103.79) | -1.24 (-56.79, 55.56)   |
| 0.37 (-97.91, 96.16)    | Doxycycline             | -22.54 (-101.25, 51.93) | 36.79 (-58.43, 131.02) | 44.49 (-24.94, 108.29) | -25.74 (-80.55, 29.01)   | -9.82 (-102.66, 83.38)   | -0.72 (-83.26, 77.19)   |
| 23.52 (-77.32, 121.32)  | 22.54 (-51.93, 101.25)  | Glycyrrhiza             | 59.22 (-34.92, 152.48) | 67.71 (-1.53, 133.22)  | -3.13 (-57.59, 52.06)    | 13.12 (-80.52, 104.59)   | 22.47 (-60.22, 99.57)   |
| -35.77 (-148.25, 75.63) | -36.79 (-131.02, 58.43) | -59.22 (-152.48, 34.92) | Insulin-liposomal gel  | 8.30 (-79.64, 92.53)   | -62.07 (-137.87, 14.99)  | -46.23 (-152.78, 61.73)  | -36.81 (-135.30, 56.99) |
| -44.11 (-111.65, 24.98) | -44.49 (-108.29, 24.94) | -67.71 (-133.22, 1.53)  | -8.30 (-92.53, 79.64)  | Laser                  | -70.45 (-107.84, -28.77) | -54.50 (-137.91, 35.31)  | -45.11 (-88.94, -1.39)  |
| 26.08 (-55.32, 106.28)  | 25.74 (-29.01, 80.55)   | 3.13 (-52.06, 57.59)    | 62.07 (-14.99, 137.87) | 70.45 (28.77, 107.84)  | Placebo                  | 15.94 (-59.36, 92.86)    | 25.28 (-35.00, 83.01)   |
| 10.56 (-103.79, 120.97) | 9.82 (-83.38, 102.66)   | -13.12 (-104.59, 80.52) | 46.23 (-61.73, 152.78) | 54.50 (-35.31, 137.91) | -15.94 (-92.86, 59.36)   | Silver nitrate           | 9.15 (-89.92, 103.20)   |
| 1.24 (-55.56, 56.79)    | 0.72 (-77.19, 83.26)    | -22.47 (-99.57, 60.22)  | 36.81 (-56.99, 135.30) | 45.11 (1.39, 88.94)    | -25.28 (-83.01, 35.00)   | -9.15 (-103.20, 89.92)   | Triamcinolone           |

#### 1.2 Rank probability(Rank 1 is best, rank N is worst)

| Drug                  | Rank 1 | Rank 2 | Rank 3 | Rank 4 | Rank 5 | Rank 6 | Rank 7 | Rank 8 |
|-----------------------|--------|--------|--------|--------|--------|--------|--------|--------|
| Curcumin              | 0.05   | 0.11   | 0.18   | 0.17   | 0.15   | 0.11   | 0.1    | 0.13   |
| Doxycycline           | 0.04   | 0.09   | 0.19   | 0.18   | 0.2    | 0.15   | 0.09   | 0.06   |
| Glycyrrhiza           | 0.01   | 0.03   | 0.06   | 0.1    | 0.13   | 0.17   | 0.2    | 0.3    |
| Insulin-liposomal gel | 0.37   | 0.27   | 0.13   | 0.09   | 0.06   | 0.04   | 0.02   | 0.02   |
| Laser                 | 0.47   | 0.37   | 0.11   | 0.03   | 0.01   | 0      | 0      | 0      |
| Placebo               | 0      | 0      | 0.01   | 0.03   | 0.11   | 0.25   | 0.37   | 0.23   |
| Silver nitrate        | 0.05   | 0.07   | 0.13   | 0.13   | 0.14   | 0.14   | 0.12   | 0.21   |
| Triamcinolone         | 0.01   | 0.06   | 0.19   | 0.26   | 0.2    | 0.14   | 0.11   | 0.05   |

1.3 Consistency check

| Parameter                         | Median (95% CI)      |
|-----------------------------------|----------------------|
| Random Effects Standard Deviation | 33.57 (18.72, 66.78) |

1.4 Convergence Diagnostics

| Parameter                     | PSRF |                                |
|-------------------------------|------|--------------------------------|
| d.Laser.Placebo               | 1.00 | Number of chains : 4           |
| d.Laser.Triamcinolone         | 1.00 | Tuning iterations : 20,000     |
| d.Placebo.Doxycycline         | 1.00 | Simulation iterations : 50,000 |
| d.Placebo.Glycyrrhiza         | 1.00 | Thinning interval : 10         |
| d.Placebo.Insulinliposomalgel | 1.00 | Inference samples : 10,000     |
| d.Placebo.Silvernitrate       | 1.00 | Variance scaling factor: 2.5   |
| d.Triamcinolone.Curcumin      | 1.00 |                                |
| sd.d                          | 1.00 |                                |

2.Inconsistency Model

2.1 Summary estimates

|                         |                         |                         |                        |                        |                          |                          |                         |
|-------------------------|-------------------------|-------------------------|------------------------|------------------------|--------------------------|--------------------------|-------------------------|
| Curcumin                | -1.01 (-97.93, 98.18)   | -23.17 (-119.67, 73.70) | 33.83 (-76.96, 146.31) | 43.94 (-27.10, 115.41) | -26.28 (-106.73, 57.30)  | -10.71 (-122.07, 100.07) | -0.75 (-54.60, 55.29)   |
| 1.01 (-98.18, 97.93)    | Doxycycline             | -21.97 (-99.46, 53.67)  | 34.47 (-58.00, 130.14) | 45.24 (-22.76, 111.78) | -25.57 (-79.97, 27.68)   | -9.36 (-101.74, 82.54)   | 0.45 (-80.83, 80.36)    |
| 23.17 (-73.70, 119.67)  | 21.97 (-53.67, 99.46)   | Glycyrrhiza             | 57.99 (-34.90, 152.79) | 67.35 (-0.81, 131.27)  | -3.43 (-55.87, 50.90)    | 12.43 (-82.33, 108.22)   | 22.44 (-56.96, 101.81)  |
| -33.83 (-146.31, 76.96) | -34.47 (-130.14, 58.00) | -57.99 (-152.79, 34.90) | Insulin-liposomal gel  | 10.23 (-75.90, 94.54)  | -60.82 (-137.64, 15.77)  | -44.96 (-153.51, 61.54)  | -35.10 (-132.96, 60.61) |
| -43.94 (-115.41, 27.10) | -45.24 (-111.78, 22.76) | -67.35 (-131.27, 0.81)  | -10.23 (-94.54, 75.90) | Laser                  | -70.72 (-109.05, -29.71) | -55.52 (-138.86, 33.38)  | -44.83 (-88.31, 0.54)   |
| 26.28 (-57.30, 106.73)  | 25.57 (-27.68, 79.97)   | 3.43 (-50.90, 55.87)    | 60.82 (-15.77, 137.64) | 70.72 (29.71, 109.05)  | Placebo                  | 16.19 (-60.01, 91.33)    | 25.95 (-33.34, 83.79)   |
| 10.71 (-100.07, 122.07) | 9.36 (-82.54, 101.74)   | -12.43 (-108.22, 82.33) | 44.96 (-61.54, 153.51) | 55.52 (-33.38, 138.86) | -16.19 (-91.33, 60.01)   | Silver nitrate           | 10.45 (-86.44, 107.98)  |
| 0.75 (-55.29, 54.60)    | -0.45 (-80.36, 80.83)   | -22.44 (-101.81, 56.96) | 35.10 (-60.61, 132.96) | 44.83 (-0.54, 88.31)   | -25.95 (-83.79, 33.34)   | -10.45 (-107.98, 86.44)  | Triamcinolone           |

2.2 Variance Calculation

| Parameter                         | Median (95% CI)      |
|-----------------------------------|----------------------|
| Random Effects Standard Deviation | 33.45 (18.80, 66.98) |
| Inconsistency Standard Deviation  | 48.39 (2.30, 92.92)  |

2.3 Convergence Diagnostics

| Parameter                     | PSRF |                                |
|-------------------------------|------|--------------------------------|
| d.Curcumin.Triamcinolone      | 1.00 | Number of chains : 4           |
| d.Laser.Placebo               | 1.00 | Tuning iterations : 20,000     |
| d.Placebo.Doxycycline         | 1.00 | Simulation iterations : 50,000 |
| d.Placebo.Glycyrrhiza         | 1.00 | Thinning interval : 10         |
| d.Placebo.Insulinliposomalgel | 1.02 | Inference samples : 10,000     |
| d.Placebo.Silvernitrate       | 1.00 | Variance scaling factor: 2.5   |
| d.Triamcinolone.Laser         | 1.00 |                                |
| sd.d                          | 1.00 |                                |
| sd.w                          | 1.00 |                                |

4. Network structure

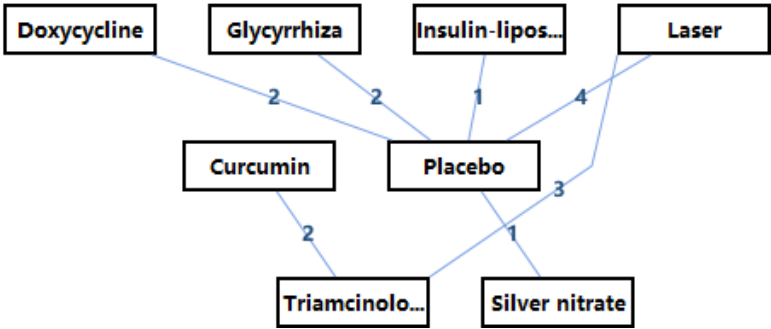

Day 2

1. Consistency Model

1.1 Summary estimates

|       |       |                         |                         |                         |                         |                          |                         |                         |                         |                         |                         |
|-------|-------|-------------------------|-------------------------|-------------------------|-------------------------|--------------------------|-------------------------|-------------------------|-------------------------|-------------------------|-------------------------|
| Alien |       | 3.40 (-.89.94, 97.62)   | 9.51 (-.83.70, 101.89)  | 3.74 (-.93.95, 105.03)  | 6.08 (-.96.67, 105.08)  | 19.35 (-.89.84, 128.27)  | 15.07 (-.92.09, 125.59) | -2.61 (-.98.28, 94.89)  | 26.29 (-.56.93, 107.58) | -12.57 (-.92.44, 67.22) | 56.63 (-.42.74, 155.52) |
|       | Alice |                         | 6.20 (-.81.94, 90.51)   | -0.23 (-.92.93, 96.77)  | 2.31 (-.94.38, 99.30)   | 15.66 (-.78.25, 110.04)  | 11.39 (-.85.34, 105.51) | -5.58 (-100.22, 96.05)  | 22.71 (-.5415, 96.85)   | -16.06 (-.90.42, 54.32) | 52.59 (-.41.81, 146.80) |
|       |       | -9.51 (-101.89, 83.70)  | -6.20 (-.90.51, 81.94)  | -5.76 (-.95.41, 86.37)  | -3.42 (-.96.59, 90.19)  | 9.20 (-.87.72, 111.65)   | 4.95 (-.91.35, 106.57)  | -11.60 (-103.14, 79.50) | 16.40 (-.54.39, 89.18)  | -22.11 (-.84.57, 39.12) | 47.10 (-.46.17, 139.35) |
|       |       | -3.74 (-105.03, 93.95)  | 0.23 (-.96.77, 92.63)   | 5.76 (-.86.37, 95.41)   | 1.39 (-.98.18, 99.64)   | 15.13 (-.94.57, 124.29)  | 11.00 (-.96.27, 119.35) | -5.45 (-103.22, 90.01)  | 22.57 (-.59.82, 101.90) | -16.35 (-.98.78, 61.26) | 53.13 (-.50.55, 151.51) |
|       |       | -6.08 (-105.08, 96.67)  | -2.31 (-.99.30, 94.38)  | 3.42 (-.90.19, 96.59)   | -1.39 (-.99.64, 98.18)  | 13.40 (-.96.90, 124.19)  | 9.47 (-.98.86, 120.83)  | -7.91 (-106.05, 89.84)  | 20.58 (-.62.06, 105.53) | -18.48 (-101.37, 62.23) | 50.88 (-.51.85, 149.69) |
|       |       | -19.35 (-128.27, 89.84) | -15.66 (-110.04, 78.25) | -9.20 (-111.65, 87.72)  | -15.13 (-124.29, 94.57) | -13.40 (-124.19, 96.90)  | -3.87 (-103.26, 93.09)  | -21.28 (-129.26, 85.89) | 7.04 (-.86.29, 98.46)   | -31.41 (-124.57, 57.78) | 37.63 (-71.27, 144.35)  |
|       |       | -15.07 (-125.58, 92.09) | -11.39 (-105.51, 85.34) | -4.95 (-106.57, 91.35)  | -11.00 (-119.35, 96.27) | 3.87 (-.93.69, 103.26)   | Curcumin                | -17.04 (-127.45, 88.97) | 11.43 (-.83.21, 102.61) | -26.85 (-119.65, 61.10) | 41.30 (-.67.99, 146.83) |
|       |       | 2.61 (-.94.89, 98.28)   | 5.58 (-.86.05, 100.22)  | 11.60 (-79.50, 103.14)  | 5.45 (-.90.01, 103.22)  | 7.91 (-.89.84, 106.05)   | 21.28 (-.85.89, 129.26) | Disinfectant            | 28.11 (-.51.30, 107.09) | -10.93 (-.91.09, 70.94) | 58.58 (-.40.87, 160.24) |
|       |       | -26.29 (-107.58, 56.93) | -22.71 (-.96.85, 54.15) | -16.40 (-.89.18, 54.39) | -22.57 (-101.90, 59.82) | -20.58 (-105.53, 62.06)  | -7.04 (-.98.46, 86.29)  | -11.43 (-102.61, 83.21) | Doxycycline             | -38.99 (-.95.11, 17.90) | 30.38 (-.50.84, 109.62) |
|       |       | 12.57 (-.67.22, 92.44)  | 16.06 (-.54.32, 90.42)  | 22.11 (-.39.12, 84.57)  | 16.35 (-.61.26, 98.78)  | 18.48 (-.62.23, 101.37)  | 31.41 (-.57.78, 124.57) | 26.85 (-.61.10, 119.65) | 10.93 (-.70.94, 91.09)  | Glycyrrhiza             | 69.13 (-11.98, 149.48)  |
|       |       | -56.63 (-155.52, 42.74) | -52.59 (-146.80, 41.81) | -47.10 (-139.35, 46.17) | -53.13 (-151.51, 50.55) | -50.68 (-149.69, 51.85)  | -37.63 (-144.35, 71.27) | -41.30 (-146.83, 67.99) | -58.58 (-160.24, 40.87) | -30.38 (-109.62, 50.84) | Insulin-lysosomal gel   |
|       |       | -29.49 (-105.91, 50.27) | -25.25 (-.92.58, 45.15) | -19.54 (-79.89, 42.15)  | -25.17 (-100.87, 55.25) | -22.68 (-103.82, 55.87)  | -9.82 (-.92.50, 76.63)  | -14.09 (-.97.34, 74.23) | -31.11 (-107.00, 45.11) | -2.86 (-.54.31, 50.47)  | 27.64 (-.50.14, 103.60) |
|       |       | -34.56 (-165.85, 90.71) | -31.16 (-148.57, 86.08) | -24.50 (-152.37, 94.27) | -30.67 (-160.78, 95.77) | -28.81 (-160.42, 101.28) | -16.21 (-.85.68, 53.57) | -19.47 (-139.62, 99.23) | -37.14 (-166.50, 89.64) | -8.54 (-125.04, 102.10) | 22.37 (-110.27, 145.21) |
|       |       | 6.22 (-.64.16, 76.51)   | 9.95 (-.52.65, 74.05)   | 16.28 (-.43.76, 75.25)  | 10.06 (-.58.15, 81.57)  | 12.41 (-.60.24, 85.16)   | 25.60 (-.56.45, 108.22) | 21.33 (-.59.51, 107.67) | 4.59 (-.64.75, 73.85)   | 32.47 (-.94.0, 73.44)   | 62.85 (-.6.66, 132.31)  |
|       |       | -13.22 (-.95.10, 67.89) | -9.42 (-70.88, 54.10)   | -3.68 (-76.70, 64.27)   | -9.37 (-.88.99, 74.07)  | -7.17 (-.91.53, 74.67)   | 6.23 (-.64.54, 77.41)   | 1.58 (-.69.17, 73.02)   | -14.80 (-.96.80, 64.63) | 12.73 (-.46.42, 69.79)  | 43.60 (-.38.94, 122.50) |
|       |       | -14.46 (-108.70, 78.86) | -10.58 (-.93.87, 73.83) | -4.99 (-.90.65, 79.91)  | -10.68 (-104.10, 83.98) | -8.83 (-106.12, 88.51)   | 4.33 (-.87.33, 99.20)   | 0.65 (-.92.87, 98.14)   | -16.63 (-107.63, 76.71) | 11.50 (-.63.35, 86.18)  | 42.77 (-.56.01, 136.19) |
|       |       | -28.43 (-124.59, 71.60) | -25.03 (-119.07, 70.44) | -19.51 (-110.16, 73.63) | -25.38 (-123.16, 80.33) | -22.95 (-122.65, 78.43)  | -9.38 (-117.58, 102.05) | -13.45 (-120.23, 98.01) | -30.48 (-128.99, 67.54) | -3.04 (-.82.75, 80.78)  | 27.71 (-70.59, 129.03)  |

|                         |                          |                         |                         |                         |                         |
|-------------------------|--------------------------|-------------------------|-------------------------|-------------------------|-------------------------|
| 29.49 (-50.27, 105.91)  | 34.56 (-30.71, 165.85)   | -6.22 (-76.51, 64.16)   | 13.22 (-67.89, 95.10)   | 14.46 (-78.86, 108.70)  | 28.43 (-71.60, 124.59)  |
| 25.25 (-45.15, 92.58)   | 31.16 (-86.08, 148.57)   | -9.96 (-74.05, 52.65)   | 9.42 (-54.10, 70.88)    | 10.58 (-73.83, 93.87)   | 25.03 (-70.44, 119.07)  |
| 19.54 (-42.15, 79.89)   | 24.50 (-34.27, 152.37)   | -16.28 (-75.25, 43.76)  | 3.68 (-64.27, 76.70)    | 4.99 (-79.91, 90.65)    | 19.51 (-73.63, 110.16)  |
| 25.17 (-55.25, 100.87)  | 30.67 (-95.77, 160.78)   | -10.06 (-81.57, 58.15)  | 9.37 (-74.07, 88.99)    | 10.68 (-83.98, 104.10)  | 25.38 (-80.33, 123.16)  |
| 22.69 (-55.87, 103.82)  | 28.81 (-101.28, 160.42)  | -12.41 (-85.16, 60.34)  | 7.17 (-74.67, 91.53)    | 8.83 (-88.51, 106.12)   | 22.95 (-78.43, 122.65)  |
| 9.82 (-76.63, 92.50)    | 16.21 (-53.57, 85.68)    | -25.60 (-108.22, 56.45) | -6.23 (-77.41, 64.54)   | -4.33 (-99.20, 87.33)   | 9.99 (-102.05, 117.58)  |
| 14.09 (-74.23, 97.34)   | 19.47 (-99.23, 139.62)   | -21.33 (-107.67, 59.51) | -1.58 (-73.02, 69.17)   | -0.65 (-98.14, 92.87)   | 13.45 (-98.01, 120.23)  |
| 31.11 (-45.11, 107.00)  | 37.14 (-89.64, 166.50)   | -4.59 (-73.85, 64.75)   | 14.80 (-64.63, 96.80)   | 16.63 (-76.71, 107.63)  | 30.48 (-67.54, 128.99)  |
| 2.86 (-50.47, 54.31)    | 8.54 (-102.10, 125.04)   | -32.47 (-73.44, 9.40)   | -12.73 (-69.79, 46.42)  | -11.50 (-86.18, 63.35)  | 3.04 (-80.78, 82.75)    |
| 41.82 (-57.5, 87.94)    | 47.78 (-64.27, 164.05)   | 6.31 (-32.85, 46.47)    | 25.60 (-28.76, 83.09)   | 26.77 (-45.24, 100.51)  | 41.47 (-39.25, 119.63)  |
| -27.64 (-103.60, 50.14) | -22.37 (-145.21, 110.27) | -62.85 (-132.31, 6.66)  | -43.60 (-122.50, 38.94) | -42.77 (-136.19, 56.01) | -27.71 (-129.03, 70.59) |
| Laser                   | 5.89 (-101.97, 117.71)   | -35.33 (-68.12, -0.74)  | -16.00 (-60.86, 31.63)  | -14.36 (-81.77, 55.86)  | -0.64 (-78.36, 76.07)   |
| -5.89 (-117.71, 101.97) | N-acetylcysteine         | -40.81 (-149.04, 65.00) | -21.80 (-121.29, 76.19) | -19.88 (-138.34, 97.45) | -6.16 (-136.72, 120.53) |
| 35.33 (0.74, 68.12)     | 40.81 (-85.00, 149.04)   | Placebo                 | 19.69 (-21.03, 61.57)   | 21.17 (-41.69, 83.57)   | 35.36 (-36.44, 104.58)  |
| 16.00 (-31.63, 60.86)   | 21.80 (-76.19, 121.29)   | -19.69 (-61.57, 21.03)  | Triamcinolone           | 1.62 (-62.58, 63.40)    | 15.26 (-67.19, 97.45)   |
| 14.36 (-55.86, 81.77)   | 19.88 (-97.45, 138.34)   | -21.17 (-73.57, 41.69)  | -1.62 (-63.40, 62.58)   | Triester Glycerol Oxide | 14.37 (-80.76, 107.03)  |
| 0.64 (-76.07, 78.36)    | 6.16 (-120.53, 136.72)   | -35.36 (-104.58, 36.44) | -15.26 (-97.45, 67.19)  | -14.37 (-107.03, 80.76) | Zinc                    |

## 1.2 Rank probability(Rank 1 is best, rank N is worst)

| Drug                    | Rank 1 | Rank 2 | Rank 3 | Rank 4 | Rank 5 | Rank 6 | Rank 7 | Rank 8 | Rank 9 | Rank 10 | Rank 11 | Rank 12 | Rank 13 | Rank 14 | Rank 15 | Rank 16 | Rank 17 |
|-------------------------|--------|--------|--------|--------|--------|--------|--------|--------|--------|---------|---------|---------|---------|---------|---------|---------|---------|
| Allicin                 | 0.02   | 0.03   | 0.04   | 0.04   | 0.04   | 0.05   | 0.05   | 0.05   | 0.06   | 0.06    | 0.06    | 0.06    | 0.06    | 0.07    | 0.08    | 0.1     | 0.13    |
| Aloe                    | 0.01   | 0.03   | 0.03   | 0.04   | 0.04   | 0.05   | 0.06   | 0.06   | 0.07   | 0.07    | 0.07    | 0.07    | 0.07    | 0.07    | 0.08    | 0.08    | 0.08    |
| Amlexanox               | 0.02   | 0.04   | 0.05   | 0.05   | 0.06   | 0.07   | 0.07   | 0.07   | 0.07   | 0.08    | 0.07    | 0.07    | 0.06    | 0.06    | 0.07    | 0.06    | 0.05    |
| Berberine gelatin       | 0.03   | 0.03   | 0.04   | 0.05   | 0.05   | 0.05   | 0.05   | 0.05   | 0.06   | 0.06    | 0.06    | 0.06    | 0.06    | 0.07    | 0.07    | 0.09    | 0.1     |
| Chitosan                | 0.03   | 0.05   | 0.05   | 0.05   | 0.05   | 0.05   | 0.05   | 0.05   | 0.06   | 0.06    | 0.06    | 0.06    | 0.06    | 0.06    | 0.07    | 0.08    | 0.11    |
| Chlorhexidine           | 0.03   | 0.09   | 0.1    | 0.08   | 0.07   | 0.06   | 0.06   | 0.06   | 0.05   | 0.05    | 0.05    | 0.04    | 0.04    | 0.05    | 0.05    | 0.06    | 0.05    |
| Curcumin                | 0.06   | 0.07   | 0.07   | 0.07   | 0.06   | 0.06   | 0.05   | 0.06   | 0.05   | 0.05    | 0.05    | 0.05    | 0.05    | 0.05    | 0.05    | 0.06    | 0.08    |
| Diosmectite             | 0.02   | 0.03   | 0.03   | 0.04   | 0.04   | 0.04   | 0.05   | 0.05   | 0.05   | 0.06    | 0.06    | 0.06    | 0.06    | 0.07    | 0.08    | 0.11    | 0.14    |
| Doxycycline             | 0.03   | 0.08   | 0.1    | 0.11   | 0.11   | 0.11   | 0.1    | 0.09   | 0.07   | 0.06    | 0.05    | 0.03    | 0.03    | 0.02    | 0.01    | 0.01    | 0       |
| Glycyrrhiza             | 0      | 0      | 0      | 0      | 0.01   | 0.01   | 0.02   | 0.03   | 0.04   | 0.05    | 0.07    | 0.08    | 0.11    | 0.12    | 0.16    | 0.17    | 0.13    |
| Insulin-liposomal gel   | 0.38   | 0.18   | 0.11   | 0.07   | 0.05   | 0.04   | 0.03   | 0.02   | 0.02   | 0.02    | 0.02    | 0.01    | 0.01    | 0.01    | 0.01    | 0.01    | 0.01    |
| Laser                   | 0.02   | 0.07   | 0.11   | 0.14   | 0.14   | 0.13   | 0.11   | 0.09   | 0.07   | 0.05    | 0.03    | 0.02    | 0.01    | 0.01    | 0       | 0       | 0       |
| N-acetylcysteine        | 0.22   | 0.13   | 0.08   | 0.06   | 0.05   | 0.05   | 0.04   | 0.04   | 0.04   | 0.03    | 0.03    | 0.03    | 0.03    | 0.03    | 0.03    | 0.04    | 0.05    |
| Placebo                 | 0      | 0      | 0      | 0      | 0      | 0      | 0.01   | 0.02   | 0.04   | 0.07    | 0.11    | 0.16    | 0.2     | 0.2     | 0.13    | 0.06    | 0.01    |
| Triamcinolone           | 0      | 0.01   | 0.02   | 0.04   | 0.07   | 0.09   | 0.11   | 0.12   | 0.13   | 0.12    | 0.1     | 0.07    | 0.06    | 0.04    | 0.02    | 0.01    | 0       |
| Triester Glycerol Oxide | 0.03   | 0.05   | 0.06   | 0.07   | 0.07   | 0.07   | 0.08   | 0.08   | 0.07   | 0.07    | 0.06    | 0.06    | 0.05    | 0.05    | 0.05    | 0.05    | 0.04    |
| Zinc                    | 0.1    | 0.12   | 0.1    | 0.08   | 0.08   | 0.07   | 0.06   | 0.05   | 0.05   | 0.05    | 0.04    | 0.04    | 0.03    | 0.03    | 0.03    | 0.03    | 0.03    |

1.3 Consistency check

|                                   |                      |
|-----------------------------------|----------------------|
| Parameter                         | Median (95% CI)      |
| Random Effects Standard Deviation | 30.83 (18.70, 56.88) |

1.4 Convergence Diagnostics

| Parameter                           | PSRF |                                |
|-------------------------------------|------|--------------------------------|
| d.Chlorhexidine.Nacetylcysteine     | 1.00 |                                |
| d.Placebo.Allicin                   | 1.00 |                                |
| d.Placebo.Amlexanox                 | 1.00 |                                |
| d.Placebo.Berberinegelatin          | 1.00 |                                |
| d.Placebo.Chitosan                  | 1.00 |                                |
| d.Placebo.Diosmectite               | 1.00 |                                |
| d.Placebo.Doxycline                 | 1.00 |                                |
| d.Placebo.Glycyrrhiza               | 1.00 |                                |
| d.Placebo.Insulinliposomalgel       | 1.00 |                                |
| d.Placebo.Zinc                      | 1.00 |                                |
| d.Triamcinolone.Aloe                | 1.00 |                                |
| d.Triamcinolone.Chlorhexidine       | 1.00 |                                |
| d.Triamcinolone.Curcumin            | 1.00 |                                |
| d.Triamcinolone.Laser               | 1.00 |                                |
| d.Triamcinolone.Placebo             | 1.00 |                                |
| d.Triamcinolone.TriesterGlycerol... | 1.00 |                                |
| sd.d                                | 1.00 |                                |
|                                     |      | Number of chains : 4           |
|                                     |      | Tuning iterations : 20,000     |
|                                     |      | Simulation iterations : 50,000 |
|                                     |      | Thinning interval : 10         |
|                                     |      | Inference samples : 10,000     |
|                                     |      | Variance scaling factor: 2.5   |

2.Inconsistency Model

2.1 Summary estimates

|                          |                      |                        |                        |                        |                        |                        |
|--------------------------|----------------------|------------------------|------------------------|------------------------|------------------------|------------------------|
| Allicin                  | 0.57 (-91.04, 92.65) | -8.17 (-107.31, 95.14) | 3.67 (-92.49, 97.91)   | 4.88 (-95.09, 102.50)  | 12.05 (-94.00, 122.61) | 8.28 (-98.60, 112.96)  |
| -0.57 (-92.65, 91.04)    | Aloe                 | -8.52 (-102.22, 85.71) | 3.12 (-89.10, 93.14)   | 5.19 (-89.16, 96.18)   | 11.50 (-83.21, 105.19) | 7.28 (-87.59, 98.59)   |
| 8.17 (-95.14, 107.31)    |                      | Amlexanox              | 11.42 (-89.14, 110.47) | 12.40 (-90.88, 113.48) | 20.47 (-89.62, 124.61) | 15.78 (-90.52, 119.68) |
| -3.67 (-97.91, 92.49)    |                      |                        | Berberine gelatin      | 1.90 (-96.14, 98.24)   | 9.03 (-97.27, 115.03)  | 4.14 (-102.24, 111.37) |
| -4.88 (-102.50, 95.09)   |                      |                        |                        | Chitosan               | 6.86 (-101.00, 115.22) | 3.20 (-103.89, 109.15) |
| -12.05 (-122.61, 94.00)  |                      |                        |                        |                        | Chlorhexidine          | -3.78 (-106.82, 91.86) |
| -8.28 (-112.96, 98.60)   |                      |                        |                        |                        |                        | Curcumin               |
| 1.87 (-94.40, 99.94)     |                      |                        |                        |                        |                        |                        |
| -25.84 (-103.01, 54.72)  |                      |                        |                        |                        |                        |                        |
| 19.94 (-69.38, 110.60)   |                      |                        |                        |                        |                        |                        |
| -56.54 (-151.60, 41.49)  |                      |                        |                        |                        |                        |                        |
| -8.69 (-98.69, 82.35)    |                      |                        |                        |                        |                        |                        |
| -28.04 (-157.85, 101.79) |                      |                        |                        |                        |                        |                        |
| 6.05 (-59.80, 75.65)     |                      |                        |                        |                        |                        |                        |
| -5.80 (-88.67, 76.05)    |                      |                        |                        |                        |                        |                        |
| -11.85 (-106.97, 81.91)  |                      |                        |                        |                        |                        |                        |
| -28.21 (-123.86, 67.75)  |                      |                        |                        |                        |                        |                        |

|                          |                         |                         |                         |                         |                          |                         |                         |                          |                         |
|--------------------------|-------------------------|-------------------------|-------------------------|-------------------------|--------------------------|-------------------------|-------------------------|--------------------------|-------------------------|
| -1.87 (-99.94, 94.40)    | 25.84 (-54.72, 103.01)  | -19.94 (-110.60, 69.38) | 56.54 (-41.49, 151.60)  | 8.69 (-82.35, 98.69)    | 28.04 (-101.79, 157.85)  | -6.05 (-75.65, 59.80)   | 5.80 (-76.05, 88.67)    | 11.85 (-61.91, 106.97)   | 28.21 (-67.75, 123.86)  |
| -2.00 (-97.54, 89.75)    | 25.44 (-49.10, 95.41)   | -20.74 (-106.27, 60.02) | 56.17 (-34.45, 145.55)  | 7.93 (-73.10, 85.31)    | 27.13 (-93.20, 148.34)   | -6.70 (-70.69, 52.44)   | 5.28 (-55.58, 65.43)    | 11.58 (-70.57, 92.55)    | 28.13 (-64.25, 118.20)  |
| 5.75 (-96.63, 105.31)    | 33.39 (-53.63, 115.76)  | -11.95 (-79.42, 50.41)  | 64.62 (-37.48, 162.01)  | 16.09 (-45.77, 76.53)   | 36.02 (-93.54, 160.43)   | -12.46 (-94.50, 70.77)  | 14.31 (-64.68, 89.91)   | 19.35 (-77.14, 112.88)   | 36.44 (-65.67, 133.41)  |
| -4.90 (-100.25, 88.79)   | 22.38 (-58.52, 99.36)   | -23.50 (-113.16, 65.79) | 52.67 (-43.14, 149.39)  | 5.21 (-83.88, 94.18)    | 24.07 (-106.64, 153.77)  | -9.75 (-78.11, 57.83)   | 2.33 (-75.62, 84.44)    | 8.22 (-83.80, 104.89)    | 24.71 (-69.38, 121.42)  |
| -6.86 (-105.30, 91.45)   | 20.54 (-61.47, 101.78)  | -24.72 (-116.87, 67.47) | 51.33 (-46.18, 149.55)  | 3.27 (-87.18, 95.98)    | 23.13 (-109.46, 152.42)  | -11.54 (-82.46, 59.63)  | 0.97 (-80.90, 84.76)    | 6.58 (-85.99, 103.77)    | 22.70 (-75.87, 123.42)  |
| -13.80 (-124.83, 81.54)  | 13.57 (-80.29, 104.97)  | -32.52 (-130.35, 64.35) | 44.70 (-63.74, 151.02)  | -4.11 (-95.73, 90.90)   | 16.03 (-52.07, 85.50)    | -18.62 (-102.47, 64.01) | -5.34 (-77.90, 64.41)   | -0.05 (-94.59, 93.31)    | 16.57 (-92.96, 121.28)  |
| -9.68 (-115.92, 96.24)   | 17.45 (-72.45, 106.93)  | -27.84 (-125.10, 66.00) | 48.96 (-58.09, 154.57)  | -0.15 (-87.26, 90.18)   | 19.75 (-99.46, 142.65)   | -13.99 (-95.92, 67.11)  | -2.01 (-69.78, 69.58)   | 3.89 (-88.40, 99.75)     | 20.91 (-86.47, 125.09)  |
| Diuretic                 | 27.44 (-52.00, 106.47)  | -18.22 (-108.64, 71.45) | 58.73 (-35.87, 153.82)  | 10.18 (-76.43, 99.96)   | 29.54 (-102.57, 163.99)  | -4.78 (-73.08, 63.50)   | 7.82 (-71.26, 90.56)    | 13.19 (-76.00, 108.44)   | 30.27 (-66.63, 125.15)  |
| -27.44 (-106.47, 52.00)  | Doxycycline             | -45.06 (-119.85, 25.08) | 30.71 (-47.09, 109.95)  | -17.02 (-86.86, 51.87)  | 2.23 (-114.31, 120.71)   | -32.08 (-74.10, 7.39)   | -19.57 (-77.20, 42.34)  | -13.61 (-88.15, 62.31)   | 2.95 (-77.09, 80.75)    |
| 18.22 (-71.45, 108.64)   | 45.06 (-25.08, 119.85)  | Glycyrrhiza             | 77.22 (-15.05, 168.39)  | 28.80 (-26.28, 84.53)   | 48.38 (-73.96, 170.94)   | 17.31 (-28.07, 61.19)   | 26.09 (-37.52, 94.50)   | 31.66 (-54.47, 118.29)   | 48.20 (-42.08, 141.04)  |
| -58.73 (-153.82, 35.87)  | -30.71 (-108.95, 47.09) | -77.22 (-168.39, 15.05) | Inulin-liposomal gel    | -48.23 (-137.98, 42.27) | -28.13 (-157.14, 100.25) | -62.97 (-131.39, 5.72)  | -50.82 (-128.96, 30.35) | -44.46 (-137.86, 48.74)  | -28.57 (-124.37, 69.17) |
| -10.18 (-99.96, 76.43)   | 17.02 (-51.87, 86.86)   | -28.80 (-84.53, 26.28)  | 48.23 (-42.27, 137.98)  | Laser                   | 20.35 (-98.03, 136.11)   | -28.53 (-97.33, 43.83)  | -2.44 (-58.54, 56.23)   | 3.56 (-76.77, 82.97)     | 19.57 (-67.55, 110.40)  |
| -29.54 (-165.99, 102.57) | -2.23 (-120.71, 114.31) | -48.38 (-170.94, 73.96) | 28.13 (-100.25, 157.14) | -20.35 (-136.11, 98.03) | N-acetylcysteine         | -34.42 (-145.38, 75.47) | -21.71 (-123.43, 80.01) | -15.49 (-139.26, 105.04) | 0.63 (-132.36, 128.30)  |
| 4.78 (-63.50, 73.08)     | 32.08 (-7.39, 74.10)    | -17.31 (-61.19, 28.07)  | 62.97 (-5.72, 131.39)   | 28.53 (-43.83, 97.33)   | 34.42 (-75.47, 145.38)   | Placebo                 | 12.29 (-29.47, 58.66)   | 18.50 (-42.97, 82.61)    | 34.99 (-33.54, 101.57)  |
| -7.82 (-90.56, 71.26)    | 19.57 (-42.34, 77.20)   | -26.09 (-94.50, 37.52)  | 50.82 (-30.55, 128.86)  | 2.44 (-56.23, 58.54)    | 21.71 (-80.01, 123.43)   | -12.29 (-58.66, 29.47)  | Triamcinolone           | 5.57 (-57.38, 69.33)     | 22.09 (-60.36, 104.20)  |
| -13.19 (-108.44, 76.00)  | 13.61 (-62.31, 88.15)   | -31.66 (-118.29, 54.47) | 44.46 (-48.74, 137.66)  | -3.56 (-82.97, 76.77)   | 15.49 (-105.04, 139.26)  | -18.50 (-82.61, 42.97)  | -5.57 (-69.33, 57.38)   | Triester Glycerol Olate  | 16.90 (-78.33, 106.91)  |
| -30.27 (-125.15, 66.63)  | -2.95 (-80.75, 77.09)   | -48.20 (-141.04, 42.08) | 28.57 (-69.17, 124.37)  | -19.57 (-110.40, 67.55) | -0.63 (-128.30, 132.36)  | -34.99 (-101.57, 33.54) | -22.09 (-104.20, 60.36) | -16.90 (-106.91, 78.33)  | Zinc                    |

## 2.2 Inconsistency Factors

| Cycle                                      | Median (95% CI)      |
|--------------------------------------------|----------------------|
| Glycyrrhiza, Laser, Placebo, Triamcinolone | 2.55 (-55.03, 60.50) |
| Laser, Placebo, Triamcinolone              | 9.41 (-48.09, 83.17) |
| Laser, Placebo, Triamcinolone              | 9.41 (-48.09, 83.17) |

### 2.3 Variance Calculation

| Parameter                         | Median (95% CI)      |
|-----------------------------------|----------------------|
| Random Effects Standard Deviation | 30.07 (17.32, 57.49) |
| Inconsistency Standard Deviation  | 31.46 (2.78, 74.72)  |

### 2.4 Convergence Diagnostics

| Parameter                           | PSRF |  |
|-------------------------------------|------|--|
| d.Allicin.Placebo                   | 1.00 |  |
| d.Aloe.Triamcinolone                | 1.01 |  |
| d.Amlexanox.Glycyrrhiza             | 1.00 |  |
| d.Chlorhexidine.Nacetylcysteine     | 1.00 |  |
| d.Laser.Amlexanox                   | 1.03 |  |
| d.Placebo.Aloe                      | 1.00 |  |
| d.Placebo.Berberinegelatin          | 1.00 |  |
| d.Placebo.Chitosan                  | 1.00 |  |
| d.Placebo.Diosmectite               | 1.00 |  |
| d.Placebo.Doxycycline               | 1.00 |  |
| d.Placebo.Insulinliposomalgel       | 1.00 |  |
| d.Placebo.Zinc                      | 1.00 |  |
| d.Triamcinolone.Chlorhexidine       | 1.00 |  |
| d.Triamcinolone.Curcumin            | 1.00 |  |
| d.Triamcinolone.Laser               | 1.01 |  |
| d.Triamcinolone.TriesterGlycerol... | 1.00 |  |
| w.Glycyrrhiza.Laser.Triamcinolon... | 1.00 |  |
| w.Laser.Placebo.Triamcinolone       | 1.01 |  |
| w.Laser.Placebo.Triamcinolone       | 1.01 |  |
| sd.d                                | 1.01 |  |
| sd.w                                | 1.01 |  |

Number of chains : 4

Tuning iterations : 20,000

Simulation iterations : 50,000

Thinning interval : 10

Inference samples : 10,000

Variance scaling factor: 2.5

### 3. Node-splitting analysis

| Name                   | Direct Effect           | Indirect Effect        | Overall                | P-Value |
|------------------------|-------------------------|------------------------|------------------------|---------|
| Glycyrrhiza, Laser     | 22.17 (-50.35, 96.69)   | 47.47 (-14.03, 106.87) | 41.82 (-5.75, 87.94)   | 0.55    |
| Laser, Placebo         | -48.05 (-80.34, -14.42) | 1.37 (-53.56, 56.74)   | -35.33 (-68.12, -0.74) | 0.11    |
| Laser, Triamcinolone   | 12.25 (-61.23, 86.57)   | -34.09 (-94.67, 28.70) | -16.00 (-60.86, 31.63) | 0.29    |
| Placebo, Triamcinolone | 7.80 (-41.33, 55.90)    | 55.55 (-27.48, 139.67) | 19.69 (-21.03, 61.57)  | 0.29    |

### 4. Network structure

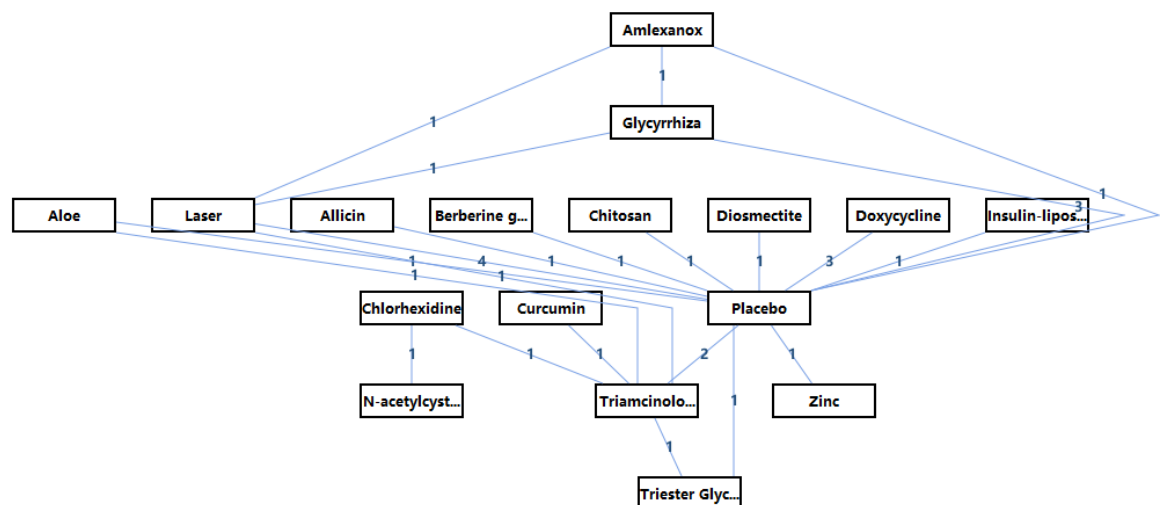

Day 3

1. Consistency Model

1.1 Summary estimates

|                         |                         |                        |                         |                         |                         |                         |                         |                         |                         |                          |
|-------------------------|-------------------------|------------------------|-------------------------|-------------------------|-------------------------|-------------------------|-------------------------|-------------------------|-------------------------|--------------------------|
| Aloe                    | -9.13 (-73.82, 57.44)   | 58.24 (-24.84, 139.41) | 29.60 (-52.29, 110.36)  | -13.20 (-101.11, 78.74) | -3.36 (-83.68, 76.37)   | 22.86 (-43.10, 85.01)   | 0.27 (-69.07, 69.50)    | 61.60 (-19.68, 140.69)  | 46.86 (-13.22, 105.60)  | -14.13 (-68.67, 39.93)   |
|                         | Artichoke               | 66.83 (-8.92, 143.52)  | 38.96 (-35.34, 114.71)  | -4.16 (-66.53, 59.51)   | 5.40 (-71.43, 78.71)    | 31.59 (-29.19, 87.67)   | 9.23 (-54.96, 69.92)    | 70.28 (-6.97, 142.83)   | 56.14 (4.09, 104.54)    | -4.96 (-50.43, 37.96)    |
| -58.24 (-139.41, 24.84) | -66.83 (-143.52, 8.92)  | Chlorella              | -28.43 (-117.18, 59.80) | -70.95 (-168.23, 28.69) | -61.12 (-155.95, 30.59) | -35.39 (-114.68, 41.83) | -57.86 (-143.61, 23.86) | 3.43 (-90.19, 92.85)    | -10.93 (-82.32, 59.07)  | -71.92 (-142.56, -1.15)  |
| -29.60 (-110.36, 52.29) | -38.96 (-114.71, 35.34) | Curcumin               | 42.28 (-56.86, 139.10)  | -42.28 (-139.10, 56.66) | -32.80 (-125.26, 57.32) | -6.75 (-85.53, 68.69)   | -29.10 (-109.56, 49.50) | 31.91 (-60.27, 122.99)  | 17.39 (-51.96, 86.16)   | -43.73 (-112.15, 23.90)  |
| 13.20 (-78.74, 101.11)  | 4.16 (-59.51, 66.53)    | Decamethasone          | -10.06 (-104.54, 89.53) | 10.06 (-89.53, 104.54)  | Decoactive              | 35.63 (-50.23, 118.63)  | 13.62 (-78.11, 98.67)   | 74.78 (-25.07, 168.47)  | 59.96 (-19.85, 137.81)  | -1.15 (-79.00, 73.21)    |
| 3.36 (-76.37, 83.68)    | -5.40 (-78.71, 71.43)   | 61.12 (-30.59, 155.95) | 32.80 (-57.32, 125.26)  | -10.06 (-104.54, 89.53) | Decoactive              | 26.04 (-44.12, 95.62)   | 3.72 (-71.43, 78.24)    | 64.56 (-19.38, 147.67)  | 50.19 (-16.83, 118.73)  | -10.83 (-69.15, 49.83)   |
| -22.86 (-85.01, 43.10)  | -31.59 (-87.67, 29.19)  | 35.39 (-41.83, 114.68) | 6.75 (-88.69, 85.53)    | -35.63 (-118.63, 50.29) | -26.04 (-95.62, 44.12)  | Decoycline              | -22.80 (-77.75, 34.90)  | 38.74 (-29.50, 108.94)  | 24.10 (-23.43, 72.37)   | -36.76 (-71.84, 0.37)    |
| -0.27 (-69.50, 69.07)   | -9.23 (-69.92, 54.96)   | 57.86 (-23.86, 143.61) | 29.10 (-49.50, 109.56)  | -13.62 (-98.67, 78.11)  | -3.72 (-76.24, 71.43)   | 22.80 (-34.90, 77.75)   | Glycerin                | 60.89 (-10.83, 134.76)  | 46.81 (-6.24, 101.02)   | -14.03 (-57.80, 29.48)   |
| -61.60 (-140.69, 19.68) | -70.28 (-142.83, 6.97)  | -3.43 (-92.85, 90.19)  | -31.91 (-122.98, 60.27) | -74.78 (-168.47, 25.07) | -64.56 (-147.67, 19.38) | -38.74 (-108.94, 29.50) | -60.89 (-134.76, 10.83) | Insulin-liposomal gel   | -14.35 (-82.01, 53.90)  | -75.51 (-134.42, -14.96) |
| -46.86 (-105.60, 13.22) | -56.14 (-104.54, -4.09) | 10.93 (-59.07, 82.32)  | -17.39 (-86.16, 51.96)  | -59.96 (-137.81, 19.85) | -50.19 (-118.73, 16.83) | -24.10 (-72.37, 23.43)  | -46.81 (-101.02, 6.24)  | 14.35 (-53.90, 82.01)   | Laser                   | -61.05 (-92.61, -29.60)  |
| 14.13 (-39.93, 66.67)   | 4.96 (-37.96, 50.43)    | 71.92 (1.15, 142.56)   | 43.73 (-23.90, 112.15)  | 1.15 (-73.21, 79.00)    | 10.83 (-49.83, 69.15)   | 36.76 (-0.37, 71.84)    | 14.03 (-29.48, 57.80)   | 75.51 (14.96, 134.42)   | 61.05 (29.60, 92.61)    | Picacho                  |
| 5.98 (-61.32, 73.53)    | -2.75 (-64.12, 57.58)   | 63.64 (-15.11, 144.57) | 36.06 (-42.88, 115.66)  | -6.69 (-93.03, 79.84)   | 2.82 (-69.87, 75.09)    | 28.73 (-26.37, 83.25)   | 6.20 (-54.96, 65.87)    | 67.46 (-5.40, 140.36)   | 52.91 (1.21, 104.12)    | -8.11 (-49.17, 34.11)    |
| -6.45 (-85.81, 72.96)   | -15.38 (-86.67, 57.50)  | 51.08 (-36.22, 142.43) | 22.82 (-67.11, 111.76)  | -19.19 (-116.97, 76.94) | -10.22 (-55.10, 76.12)  | 16.00 (-54.33, 84.00)   | -6.85 (-78.39, 66.46)   | 54.63 (-29.53, 138.81)  | 40.64 (-26.14, 107.37)  | -20.83 (-79.71, 37.56)   |
| -77.39 (-178.97, 23.86) | -86.61 (-182.37, 7.55)  | -19.81 (-78.48, 39.13) | -47.86 (-152.07, 54.57) | -90.71 (-203.98, 23.26) | -81.19 (-189.04, 25.72) | -55.15 (-152.31, 39.83) | -77.80 (-179.72, 20.96) | -16.38 (-125.12, 89.41) | -30.82 (-122.74, 57.69) | -92.29 (-183.49, -3.94)  |
| -28.36 (-83.09, 23.71)  | -37.42 (-82.40, 6.48)   | 29.49 (-33.83, 91.32)  | 1.27 (-60.03, 62.00)    | -41.79 (-118.90, 36.15) | -31.54 (-100.86, 34.36) | -5.90 (-55.14, 40.25)   | -28.11 (-83.69, 24.95)  | 33.05 (-35.86, 100.94)  | 18.51 (-15.44, 50.02)   | -42.65 (-74.68, -12.28)  |
| -47.12 (-126.67, 32.70) | -56.04 (-130.32, 18.89) | 10.73 (-81.42, 104.71) | -17.53 (-106.36, 74.00) | -60.03 (-155.83, 39.79) | -50.40 (-138.56, 35.55) | -24.30 (-94.77, 45.56)  | -46.96 (-122.90, 25.52) | 14.70 (-71.00, 97.87)   | 0.22 (-68.49, 66.46)    | -61.36 (-121.02, -0.88)  |



|                         |                         |                        |                         |                         |
|-------------------------|-------------------------|------------------------|-------------------------|-------------------------|
| -5.98 (-7353, 61.32)    | 6.45 (-72.96, 85.81)    | 77.39 (-23.86, 178.97) | 28.36 (-23.71, 83.09)   | 47.12 (-32.70, 126.67)  |
| 2.75 (-57.58, 64.12)    | 15.38 (-57.50, 88.67)   | 86.61 (-7.55, 182.37)  | 37.42 (-6.48, 82.40)    | 56.04 (-18.89, 130.32)  |
| -63.64 (-144.57, 15.11) | -51.08 (-142.43, 36.22) | 19.81 (-39.13, 78.46)  | -29.49 (-91.32, 33.83)  | -10.73 (-104.71, 81.42) |
| -36.06 (-115.66, 42.88) | -22.62 (-111.76, 67.11) | 47.86 (-54.57, 152.07) | -1.27 (-62.00, 60.03)   | 17.53 (-74.00, 106.36)  |
| 6.69 (-79.84, 93.03)    | 19.19 (-76.94, 116.97)  | 90.71 (-23.26, 203.98) | 41.79 (-36.15, 118.90)  | 60.03 (-39.79, 155.83)  |
| -2.82 (-75.09, 69.87)   | 10.22 (-76.12, 95.10)   | 81.19 (-25.72, 189.04) | 31.54 (-34.36, 100.98)  | 50.40 (-35.55, 138.56)  |
| -28.73 (-83.25, 26.37)  | -16.00 (-84.00, 54.33)  | 55.15 (-39.83, 152.31) | 5.90 (-40.25, 55.14)    | 24.30 (-45.56, 94.77)   |
| -6.20 (-65.87, 54.98)   | 6.95 (-66.46, 78.39)    | 77.80 (-20.96, 179.72) | 28.11 (-24.95, 83.69)   | 46.96 (-25.52, 122.90)  |
| -67.46 (-140.36, 5.40)  | -54.63 (-138.61, 29.53) | 16.38 (-69.41, 125.12) | -33.05 (-100.94, 35.86) | -14.70 (-97.87, 71.00)  |
| -52.91 (-104.12, -1.21) | -40.64 (-107.37, 26.14) | 30.82 (-57.69, 122.74) | -18.51 (-50.02, 15.44)  | -0.22 (-66.46, 68.49)   |
| 8.11 (-34.11, 49.17)    | 20.63 (-37.56, 79.71)   | 92.29 (3.94, 183.49)   | 42.65 (12.28, 74.68)    | 61.36 (0.88, 121.02)    |
| Probiotics              | 12.44 (-57.90, 84.39)   | 83.66 (-11.37, 181.98) | 34.61 (-16.07, 86.79)   | 53.05 (-19.85, 127.95)  |
| -12.44 (-84.35, 57.90)  | Silver nitrate          | 71.34 (-33.85, 176.85) | 21.78 (-43.40, 88.72)   | 39.93 (-42.00, 123.78)  |
| -83.66 (-181.98, 11.37) | -71.34 (-176.85, 33.85) | Sucralfate             | -49.17 (-135.75, 35.44) | -30.63 (-139.82, 78.64) |
| -34.61 (-86.79, 16.07)  | -21.78 (-88.72, 43.40)  | 49.17 (-35.44, 135.75) | Triamcinolone           | 18.72 (-50.10, 86.48)   |
| -53.05 (-127.95, 19.85) | -39.93 (-123.78, 42.00) | 30.63 (-76.64, 139.82) | -18.72 (-66.48, 50.10)  | Zinc                    |

## 1.2 Rank probability(Rank 1 is best, rank N is worst)

| Drug                  | Rank 1 | Rank 2 | Rank 3 | Rank 4 | Rank 5 | Rank 6 | Rank 7 | Rank 8 | Rank 9 | Rank 10 | Rank 11 | Rank 12 | Rank 13 | Rank 14 | Rank 15 | Rank 16 |
|-----------------------|--------|--------|--------|--------|--------|--------|--------|--------|--------|---------|---------|---------|---------|---------|---------|---------|
| Aloe                  | 0      | 0      | 0.01   | 0.02   | 0.02   | 0.03   | 0.05   | 0.08   | 0.09   | 0.11    | 0.11    | 0.11    | 0.09    | 0.09    | 0.09    | 0.1     |
| Amlexanox             | 0      | 0      | 0      | 0      | 0.01   | 0.01   | 0.02   | 0.04   | 0.06   | 0.09    | 0.11    | 0.13    | 0.14    | 0.14    | 0.17    | 0.08    |
| Chlorhexidine         | 0.07   | 0.29   | 0.19   | 0.13   | 0.09   | 0.06   | 0.05   | 0.03   | 0.03   | 0.02    | 0.01    | 0.01    | 0.01    | 0.01    | 0.01    | 0       |
| Curcumin              | 0.05   | 0.06   | 0.09   | 0.09   | 0.1    | 0.1    | 0.09   | 0.09   | 0.08   | 0.06    | 0.05    | 0.04    | 0.03    | 0.03    | 0.03    | 0.02    |
| Dexamethasone         | 0.01   | 0.01   | 0.01   | 0.02   | 0.02   | 0.03   | 0.03   | 0.05   | 0.05   | 0.06    | 0.07    | 0.07    | 0.07    | 0.08    | 0.12    | 0.3     |
| Diosmectite           | 0      | 0.01   | 0.01   | 0.02   | 0.03   | 0.03   | 0.05   | 0.05   | 0.08   | 0.09    | 0.1     | 0.09    | 0.09    | 0.08    | 0.11    | 0.16    |
| Doxycycline           | 0      | 0.01   | 0.03   | 0.06   | 0.08   | 0.12   | 0.14   | 0.16   | 0.13   | 0.1     | 0.07    | 0.04    | 0.02    | 0.01    | 0.01    | 0       |
| Glycyrrhiza           | 0      | 0      | 0.01   | 0.01   | 0.02   | 0.03   | 0.04   | 0.07   | 0.1    | 0.12    | 0.13    | 0.12    | 0.11    | 0.09    | 0.08    | 0.07    |
| Insulin-liposomal gel | 0.24   | 0.19   | 0.18   | 0.12   | 0.08   | 0.05   | 0.04   | 0.03   | 0.02   | 0.02    | 0.01    | 0.01    | 0       | 0       | 0       | 0       |
| Laser                 | 0.03   | 0.1    | 0.18   | 0.23   | 0.21   | 0.12   | 0.06   | 0.03   | 0.02   | 0.01    | 0       | 0       | 0       | 0       | 0       | 0       |
| Placebo               | 0      | 0      | 0      | 0      | 0      | 0      | 0      | 0      | 0.01   | 0.02    | 0.06    | 0.15    | 0.23    | 0.27    | 0.2     | 0.07    |
| Probiotics            | 0      | 0      | 0      | 0.01   | 0.01   | 0.02   | 0.03   | 0.05   | 0.07   | 0.1     | 0.12    | 0.12    | 0.12    | 0.12    | 0.11    | 0.11    |
| Silver nitrate        | 0.01   | 0.01   | 0.03   | 0.03   | 0.05   | 0.06   | 0.07   | 0.08   | 0.1    | 0.1     | 0.1     | 0.08    | 0.07    | 0.07    | 0.07    | 0.08    |
| Sucralfate            | 0.47   | 0.18   | 0.1    | 0.06   | 0.05   | 0.03   | 0.02   | 0.02   | 0.02   | 0.01    | 0.01    | 0.01    | 0.01    | 0       | 0.01    | 0.01    |
| Triamcinolone         | 0      | 0      | 0.02   | 0.05   | 0.13   | 0.21   | 0.23   | 0.17   | 0.1    | 0.05    | 0.02    | 0.01    | 0       | 0       | 0       | 0       |
| Zinc                  | 0.12   | 0.13   | 0.14   | 0.14   | 0.12   | 0.09   | 0.07   | 0.06   | 0.05   | 0.03    | 0.02    | 0.02    | 0.01    | 0.01    | 0.01    | 0.01    |

## 1.3 Consistency check

|                                   |                      |
|-----------------------------------|----------------------|
| Parameter                         | Median (95% CI)      |
| Random Effects Standard Deviation | 26.72 (16.53, 48.07) |

1.4 Convergence Diagnostics

| Parameter                     | PSRF |  |
|-------------------------------|------|--|
| d.Amlexanox.Dexamethasone     | 1.00 |  |
| d.Chlorhexidine.Sucralfate    | 1.00 |  |
| d.Placebo.Diosmectite         | 1.00 |  |
| d.Placebo.Doxycycline         | 1.00 |  |
| d.Placebo.Glycyrrhiza         | 1.00 |  |
| d.Placebo.Insulinliposomalgel | 1.03 |  |
| d.Placebo.Probiotics          | 1.00 |  |
| d.Placebo.Silvernitrate       | 1.00 |  |
| d.Placebo.Zinc                | 1.00 |  |
| d.Triamcinolone.Aloe          | 1.00 |  |
| d.Triamcinolone.Amlexanox     | 1.00 |  |
| d.Triamcinolone.Chlorhexidine | 1.00 |  |
| d.Triamcinolone.Curcumin      | 1.00 |  |
| d.Triamcinolone.Laser         | 1.00 |  |
| d.Triamcinolone.Placebo       | 1.00 |  |
| sd.d                          | 1.00 |  |

Number of chains

:

4

Tuning iterations

:

20,000

Simulation iterations

:

50,000

Thinning interval

:

10

Inference samples

:

10,000

Variance scaling factor:

2.5

2.Inconsistency Model

2.1 Summary estimates

| Aloe                    | -0.63 (-0.67, 65.06) | 66.97 (-17.22, 147.56) | 39.50 (-43.13, 120.18)  | -4.82 (-98.01, 85.74)   | 3.40 (-76.52, 84.82)    | 30.21 (-35.25, 92.99)   | 7.73 (-61.80, 74.76)    |
|-------------------------|----------------------|------------------------|-------------------------|-------------------------|-------------------------|-------------------------|-------------------------|
| 0.63 (-65.06, 67.67)    | Amlexanox            | 67.86 (-8.74, 142.50)  | 40.34 (-36.09, 111.87)  | -4.18 (-65.17, 55.25)   | 4.30 (-68.23, 76.45)    | 31.08 (-27.05, 86.75)   | 8.86 (-52.78, 67.51)    |
| -66.97 (-147.56, 17.22) |                      | Chlorhexidine          | -27.67 (-112.30, 60.21) | -71.84 (-169.01, 24.81) | -63.81 (-152.29, 30.14) | -36.49 (-116.24, 42.30) | -59.56 (-140.81, 23.44) |
| -39.50 (-120.18, 43.13) |                      |                        | Curcumin                | -44.12 (-139.47, 53.31) | -35.67 (-124.35, 56.12) | -8.58 (-85.57, 66.74)   | -31.44 (-110.59, 47.74) |
| 4.82 (-85.74, 98.01)    |                      |                        |                         | Dexamethasone           | 8.68 (-85.34, 105.12)   | 35.31 (-46.23, 117.62)  | 12.66 (-72.21, 99.27)   |
| -3.40 (-84.82, 76.52)   |                      |                        |                         |                         | Diosmectite             | 26.30 (-41.97, 95.18)   | 3.80 (-69.68, 74.13)    |
| -30.21 (-92.99, 35.25)  |                      |                        |                         |                         |                         | Doxycycline             | -22.18 (-77.04, 30.93)  |
| -7.73 (-74.76, 61.80)   |                      |                        |                         |                         |                         |                         | Glycyrrhiza             |
| -68.09 (-148.03, 14.06) |                      |                        |                         |                         |                         |                         |                         |
| -56.19 (-121.55, 5.93)  |                      |                        |                         |                         |                         |                         |                         |
| 7.19 (-47.63, 62.64)    |                      |                        |                         |                         |                         |                         |                         |
| -0.52 (-70.85, 68.74)   |                      |                        |                         |                         |                         |                         |                         |
| -13.42 (-92.52, 64.99)  |                      |                        |                         |                         |                         |                         |                         |
| -86.89 (-186.08, 19.65) |                      |                        |                         |                         |                         |                         |                         |
| -28.73 (-100.57, 45.93) |                      |                        |                         |                         |                         |                         |                         |
| -54.30 (-135.63, 26.92) |                      |                        |                         |                         |                         |                         |                         |

|                         |                         |                          |                         |                         |                        |                         |                         |
|-------------------------|-------------------------|--------------------------|-------------------------|-------------------------|------------------------|-------------------------|-------------------------|
| 68.09 (-14.06, 148.03)  | 56.19 (-5.93, 121.55)   | -7.19 (-62.64, 47.63)    | 0.52 (-68.74, 70.85)    | 13.42 (-64.99, 92.52)   | 86.89 (-19.65, 186.08) | 28.75 (-45.93, 100.57)  | 54.30 (-26.92, 135.63)  |
| 69.15 (-6.32, 140.56)   | 57.62 (4.94, 111.06)    | -6.30 (-50.34, 37.77)    | 1.21 (-59.34, 61.07)    | 14.46 (-56.69, 85.06)   | 86.45 (-9.78, 181.35)  | 38.35 (-5.33, 83.15)    | 55.02 (-20.30, 130.82)  |
| 1.61 (-90.99, 92.20)    | -9.46 (-81.48, 59.55)   | -7.414 (-143.66, -2.95)  | -66.98 (-148.52, 16.54) | -53.91 (-141.59, 35.58) | 19.22 (-37.90, 76.88)  | -28.66 (-89.86, 32.53)  | -12.07 (-103.71, 82.66) |
| 29.01 (-61.39, 116.69)  | 18.16 (-52.88, 86.50)   | -4.601 (-112.86, 21.72)  | -38.15 (-117.37, 39.03) | -25.24 (-112.88, 62.55) | 47.01 (-58.02, 150.14) | -1.36 (-59.09, 58.07)   | 15.38 (-77.14, 106.34)  |
| 72.77 (-23.04, 170.57)  | 61.64 (-18.88, 142.46)  | -1.80 (-75.51, 76.17)    | 5.55 (-79.78, 92.52)    | 18.06 (-75.32, 114.96)  | 90.98 (-23.22, 204.87) | 42.56 (-31.70, 120.26)  | 59.30 (-36.77, 158.03)  |
| 64.40 (-18.77, 146.90)  | 52.76 (-19.28, 126.30)  | -10.71 (-69.36, 47.99)   | -3.16 (-76.23, 68.52)   | 9.63 (-73.42, 92.23)    | 82.53 (-280.7, 187.00) | 34.38 (-33.95, 101.87)  | 50.59 (-34.03, 135.09)  |
| 37.92 (-31.35, 107.53)  | 26.94 (-26.66, 81.16)   | -37.11 (-70.89, -1.42)   | -29.25 (-84.27, 24.32)  | -16.59 (-83.04, 51.53)  | 55.62 (-43.26, 152.33) | 7.60 (-40.60, 57.06)    | 24.09 (-44.29, 93.93)   |
| 60.24 (-10.31, 131.93)  | 49.26 (-9.15, 107.56)   | -1.457 (-56.69, 27.09)   | -6.94 (-66.32, 52.20)   | 6.01 (-64.22, 79.02)    | 78.25 (-22.81, 179.68) | 30.15 (-22.74, 84.06)   | 46.86 (-25.69, 120.18)  |
| Insulin-thiopyronal gel | -11.34 (-81.86, 59.06)  | -7.522 (-132.46, -15.52) | -66.84 (-137.71, 3.49)  | -54.53 (-134.33, 28.68) | 18.39 (-91.13, 126.04) | -30.83 (-96.73, 39.62)  | -13.35 (-97.20, 71.51)  |
| 11.34 (-59.06, 81.86)   | Laser                   | -6.125 (-93.02, -28.02)  | -56.02 (-113.39, 1.52)  | -43.14 (-114.11, 27.67) | 29.36 (-63.98, 120.81) | -19.26 (-54.50, 18.24)  | -2.32 (-75.25, 71.60)   |
| 75.22 (15.52, 132.46)   | 61.25 (28.02, 93.02)    | Placebo                  | 7.78 (-34.66, 48.39)    | 20.41 (-36.01, 78.14)   | 93.05 (-0.58, 182.72)  | 51.67 (-5.55, 126.24)   | 61.51 (1.09, 121.53)    |
| 66.84 (-3.49, 137.71)   | 56.02 (-1.52, 113.39)   | -7.78 (-48.39, 34.66)    | Probiotics              | 12.95 (-58.15, 84.04)   | 85.89 (-16.53, 184.04) | 36.89 (-14.58, 90.96)   | 53.38 (-19.57, 126.79)  |
| 54.53 (-28.66, 134.33)  | 43.14 (-27.67, 114.11)  | -20.41 (-78.14, 36.01)   | -12.95 (-84.04, 58.15)  | Silver nitrate          | 72.50 (-38.93, 176.63) | 24.37 (-42.72, 89.91)   | 40.73 (-42.03, 124.10)  |
| -18.39 (-126.04, 91.13) | -29.36 (-120.81, 63.98) | -9.305 (-182.72, 0.89)   | -85.89 (-184.04, 16.53) | -72.50 (-176.63, 33.83) | Succinylate            | -48.24 (-132.24, 39.58) | -31.83 (-136.29, 80.66) |
| 30.83 (-39.62, 96.73)   | 19.26 (-18.24, 54.50)   | -5.167 (-126.24, 5.55)   | -36.89 (-90.96, 14.58)  | -24.37 (-89.91, 42.72)  | 48.24 (-39.58, 132.24) | Triamcinolone           | 16.64 (-52.41, 85.48)   |
| 13.35 (-71.51, 97.20)   | 2.32 (-71.60, 75.25)    | -6.151 (-121.53, -1.09)  | -53.38 (-126.79, 19.57) | -40.73 (-124.10, 42.03) | 31.83 (-80.66, 136.29) | -16.64 (-85.48, 52.41)  | Zinc                    |

## 2.2 Inconsistency Factors

| Cycle                                    | Median (95% CI)       |
|------------------------------------------|-----------------------|
| Amlexanox, Laser, Placebo, Triamcinolone | -1.00 (-44.82, 37.53) |
| Amlexanox, Placebo, Triamcinolone        | 5.22 (-40.96, 72.30)  |
| Amlexanox, Placebo, Triamcinolone        | 5.22 (-40.96, 72.30)  |

## 2.3 Variance Calculation

| Parameter                         | Median (95% CI)      |
|-----------------------------------|----------------------|
| Random Effects Standard Deviation | 25.89 (15.63, 48.04) |
| Inconsistency Standard Deviation  | 22.79 (0.64, 71.08)  |

## 2.4 Convergence Diagnostics

| Parameter                         | PSRF |  |
|-----------------------------------|------|--|
| d.Aloe.Placebo                    | 1.00 |  |
| d.Amlexanox.Dexamethasone         | 1.00 |  |
| d.Amlexanox.Triamcinolone         | 1.00 |  |
| d.Chlorhexidine.Sucralfate        | 1.00 |  |
| d.Placebo.Amlexanox               | 1.00 |  |
| d.Placebo.Diosmectite             | 1.00 |  |
| d.Placebo.Doxycycline             | 1.00 |  |
| d.Placebo.Glycyrrhiza             | 1.00 |  |
| d.Placebo.Insulinliposomalgel     | 1.00 |  |
| d.Placebo.Probiotics              | 1.00 |  |
| d.Placebo.Silvernitrate           | 1.00 |  |
| d.Placebo.Zinc                    | 1.00 |  |
| d.Triamcinolone.Chlorhexidine     | 1.00 |  |
| d.Triamcinolone.Curcumin          | 1.00 |  |
| d.Triamcinolone.Laser             | 1.00 |  |
| w.Amlexanox.Placebo.Laser.Tria... | 1.00 |  |
| w.Amlexanox.Placebo.Triamcinol... | 1.00 |  |
| w.Amlexanox.Placebo.Triamcinol... | 1.00 |  |
| sd.d                              | 1.00 |  |
| sd.w                              | 1.00 |  |

Number of chains : 4

Tuning iterations : 20,000

Simulation iterations : 50,000

Thinning interval : 10

Inference samples : 10,000

Variance scaling factor: 2.5

## 3. Node-splitting analysis

| Name                     | Direct Effect            | Indirect Effect         | Overall                 | P-Value |
|--------------------------|--------------------------|-------------------------|-------------------------|---------|
| Amlexanox, Placebo       | -5.71 (-70.72, 60.86)    | -5.20 (-79.45, 69.55)   | -4.96 (-50.43, 37.96)   | 1       |
| Amlexanox, Triamcinolone | 37.74 (-28.49, 101.58)   | 37.23 (-37.02, 111.53)  | 37.42 (-6.48, 82.40)    | 0.99    |
| Laser, Placebo           | -59.48 (-100.64, -19.03) | -63.88 (-128.46, -1.40) | -61.05 (-92.61, -29.60) | 0.9     |
| Laser, Triamcinolone     | -20.04 (-66.88, 27.58)   | -15.76 (-73.03, 42.86)  | -18.51 (-50.02, 15.44)  | 0.9     |
| Placebo, Triamcinolone   | 43.93 (-1.45, 90.98)     | 40.57 (-9.38, 91.52)    | 42.65 (12.28, 74.68)    | 0.93    |

## 4. Network structure

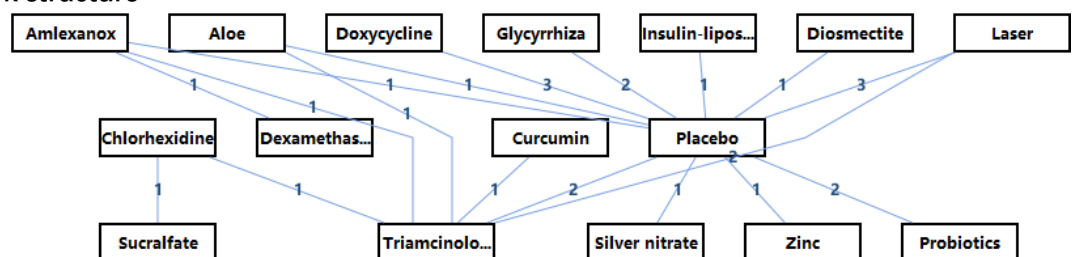

Day 4

1. Consistency Model

1.1 Summary estimates

|                        |                          |                         |                         |                        |                         |                        |                         |                        |                        |                          |
|------------------------|--------------------------|-------------------------|-------------------------|------------------------|-------------------------|------------------------|-------------------------|------------------------|------------------------|--------------------------|
| Allison                | -21.91 (-64.39, 21.05)   | 2.67 (-33.50, 38.84)    | -11.32 (-56.24, 33.22)  | -0.63 (-46.97, 45.48)  | -13.03 (-55.68, 39.89)  | 5.56 (-45.85, 56.64)   | -3.44 (-46.21, 41.16)   | -4.90 (-50.44, 42.18)  | 8.71 (-27.46, 45.95)   | -29.43 (-77.43, 18.97)   |
| 21.91 (-21.05, 64.39)  | Aloe                     | 24.59 (-6.92, 57.22)    | 10.56 (-28.69, 50.20)   | 21.07 (-21.44, 63.86)  | 8.96 (-39.61, 59.14)    | 27.57 (-18.55, 75.49)  | 18.70 (-18.25, 55.75)   | 17.55 (-26.59, 61.14)  | 30.93 (-2.94, 63.19)   | -7.57 (-51.79, 37.65)    |
| -2.67 (-38.84, 33.50)  | -24.59 (-57.22, 6.92)    | Antiseptox              | -14.13 (-47.84, 19.93)  | -3.69 (-38.63, 32.46)  | -15.71 (-58.36, 28.48)  | 3.08 (-40.60, 47.36)   | -6.14 (-39.10, 27.24)   | -7.31 (-43.76, 29.78)  | 6.05 (-17.93, 31.09)   | -32.45 (-70.10, 6.20)    |
| 11.32 (-33.22, 56.24)  | -10.56 (-50.20, 28.69)   | 14.13 (-19.93, 47.84)   | Benzodrine              | 10.62 (-32.91, 55.13)  | -1.23 (-52.67, 49.07)   | 16.69 (-29.84, 66.66)  | 7.83 (-30.63, 47.06)    | 6.66 (-38.05, 51.60)   | 20.15 (-11.58, 51.53)  | -18.19 (-64.25, 28.09)   |
| 0.63 (-45.48, 46.97)   | -21.07 (-63.86, 21.44)   | 3.69 (-32.46, 38.63)    | -10.62 (-55.13, 32.91)  | Berthone gplatin       | -11.99 (-62.17, 40.30)  | 6.45 (-46.37, 60.05)   | -2.83 (-45.20, 40.91)   | -3.74 (-50.45, 41.33)  | 9.85 (-28.21, 46.99)   | -28.66 (-76.29, 18.62)   |
| 13.03 (-39.89, 65.68)  | -8.96 (-59.14, 39.61)    | 15.71 (-28.48, 58.36)   | 1.23 (-49.07, 52.67)    | 11.99 (-40.30, 62.17)  | Chicoan                 | 18.69 (-38.67, 77.00)  | 9.33 (-40.60, 59.29)    | 8.39 (-44.65, 60.76)   | 21.78 (-24.08, 67.12)  | -16.83 (-71.68, 36.52)   |
| -5.56 (-58.64, 45.85)  | -27.57 (-75.49, 18.55)   | -3.08 (-47.36, 40.60)   | -16.89 (-66.66, 29.84)  | -6.45 (-60.05, 46.37)  | -18.69 (-77.00, 38.67)  | Chlotheadine           | -9.34 (-55.05, 35.30)   | -9.80 (-64.85, 41.30)  | 3.23 (-42.28, 46.57)   | -34.92 (-89.92, 17.73)   |
| 3.44 (-41.16, 46.21)   | -18.70 (-55.75, 18.25)   | 6.14 (-27.24, 39.10)    | -7.83 (-47.06, 30.63)   | 2.83 (-40.91, 45.20)   | -9.33 (-59.29, 40.60)   | 9.34 (-35.30, 55.05)   | Curcumin                | -0.78 (-46.11, 42.12)  | 12.42 (-21.04, 44.95)  | -25.85 (-72.22, 18.54)   |
| 4.90 (-42.18, 50.44)   | -17.55 (-61.14, 26.59)   | 7.31 (-29.78, 43.76)    | -6.66 (-51.60, 38.05)   | 3.74 (-41.33, 50.45)   | -8.39 (-60.76, 44.65)   | 9.80 (-41.30, 64.85)   | 0.78 (-42.12, 46.11)    | Dioxydicte             | 13.28 (-25.37, 51.55)  | -25.08 (-73.70, 22.82)   |
| -8.71 (-45.95, 27.46)  | -30.93 (-63.19, 2.94)    | -6.05 (-31.09, 17.93)   | -20.15 (-51.53, 11.58)  | -9.85 (-46.99, 28.21)  | -21.78 (-67.12, 24.08)  | -3.23 (-46.57, 42.28)  | -12.42 (-44.95, 21.04)  | -13.28 (-51.55, 25.37) | Dioxydicte             | -38.74 (-77.82, 1.67)    |
| 29.43 (-18.97, 77.43)  | 7.57 (-37.65, 51.79)     | 32.45 (-6.20, 70.10)    | 18.19 (-28.09, 64.25)   | 28.66 (-18.62, 76.29)  | 16.83 (-36.52, 71.68)   | 34.92 (-17.73, 89.32)  | 25.95 (-18.54, 72.22)   | 25.08 (-22.82, 73.70)  | 38.74 (-1.67, 77.82)   | Cyrtophus                |
| -13.09 (-60.69, 34.52) | -35.23 (-80.14, 10.16)   | -10.84 (-47.51, 27.20)  | -24.47 (-70.01, 20.60)  | -13.90 (-59.56, 32.08) | -26.05 (-78.39, 27.00)  | -7.75 (-60.59, 46.08)  | -16.96 (-61.16, 27.38)  | -17.87 (-65.52, 30.10) | -4.34 (-43.37, 34.69)  | -42.86 (-90.94, 6.70)    |
| -40.64 (-77.33, -3.55) | -63.17 (-94.25, -30.52)  | -38.30 (-62.16, -14.39) | -52.51 (-86.33, -18.71) | -41.65 (-78.72, -4.50) | -54.09 (-97.44, -8.87)  | -35.02 (-77.87, 8.95)  | -44.31 (-76.15, -12.45) | -45.42 (-83.03, -7.56) | -32.03 (-58.17, -6.34) | -70.48 (-109.65, -32.13) |
| -21.33 (-85.93, 43.61) | -43.12 (-106.37, 18.38)  | -18.46 (-78.02, 40.84)  | -32.40 (-94.97, 29.36)  | -22.25 (-88.47, 43.28) | -33.82 (-105.18, 35.68) | -15.39 (-55.18, 24.86) | -24.59 (-64.86, 34.91)  | -25.25 (-92.68, 39.69) | -12.17 (-72.83, 46.50) | -50.78 (-117.62, 15.63)  |
| 22.84 (-9.96, 55.31)   | 0.89 (-27.33, 28.22)     | 25.47 (9.44, 41.54)     | 11.22 (-18.37, 41.40)   | 21.88 (-99.2, 54.54)   | 9.82 (-30.90, 50.48)    | 28.64 (-12.32, 70.15)  | 19.33 (-9.52, 48.42)    | 18.29 (-15.43, 50.91)  | 31.78 (12.33, 50.54)   | -6.94 (-41.97, 27.14)    |
| -6.72 (-66.09, 51.72)  | -29.06 (-84.58, 25.10)   | -4.29 (-56.05, 46.44)   | -18.32 (-56.56, 19.80)  | -8.00 (-66.79, 50.64)  | -20.19 (-84.19, 44.82)  | -1.17 (-63.71, 61.25)  | -10.46 (-64.44, 43.95)  | -11.62 (-70.12, 46.43) | 1.73 (-47.93, 51.10)   | -36.57 (-95.38, 22.15)   |
| 4.93 (-32.43, 40.86)   | -17.32 (-46.41, 10.77)   | 7.51 (-16.21, 30.10)    | -6.55 (-36.73, 23.99)   | 4.02 (-32.53, 40.47)   | -8.29 (-51.93, 36.21)   | 10.72 (-26.37, 48.76)  | 15.41 (-22.95, 25.03)   | 0.35 (-37.15, 36.55)   | 13.66 (-9.54, 36.56)   | -24.70 (-63.31, 13.07)   |
| 1.41 (-41.86, 44.83)   | -20.40 (-59.58, 17.43)   | 4.51 (-29.26, 37.01)    | -9.59 (-50.08, 30.69)   | 0.85 (-41.75, 43.37)   | -11.10 (-60.17, 38.39)  | 7.40 (-39.51, 55.54)   | -1.93 (-39.32, 36.16)   | -2.98 (-47.52, 40.75)  | 10.51 (-23.78, 43.37)  | -28.10 (-72.01, 17.05)   |
| -41.74 (-89.11, 5.29)  | -63.52 (-107.61, -19.79) | -39.01 (-76.71, -1.31)  | -53.08 (-98.66, -8.12)  | -42.57 (-88.81, 4.15)  | -55.15 (-106.93, -0.50) | -36.14 (-88.05, 17.05) | -45.14 (-90.19, -0.19)  | -46.43 (-94.18, 1.77)  | -32.88 (-72.49, 5.56)  | -71.57 (-119.24, -21.15) |

|                        |                       |                        |                         |                        |                         |                         |                       |
|------------------------|-----------------------|------------------------|-------------------------|------------------------|-------------------------|-------------------------|-----------------------|
| 13.09 (-34.52, 60.69)  | 40.64 (3.55, 77.33)   | 21.33 (-43.61, 86.93)  | -22.84 (-55.31, 9.96)   | 6.72 (-51.72, 66.09)   | -4.93 (-40.86, 32.43)   | -1.41 (-44.83, 41.86)   | 41.74 (-5.29, 89.11)  |
| 35.23 (-101.6, 80.14)  | 63.17 (30.52, 94.25)  | 43.12 (-18.38, 106.37) | -0.89 (-28.22, 27.33)   | 29.06 (-25.10, 94.58)  | 17.32 (-10.77, 46.41)   | 20.40 (-17.43, 59.58)   | 63.52 (9.79, 107.61)  |
| 10.84 (-27.20, 47.51)  | 38.30 (14.39, 62.16)  | 18.46 (-40.84, 78.02)  | -25.47 (-41.54, -9.44)  | 4.29 (-46.44, 56.05)   | -7.51 (-30.10, 16.21)   | -4.51 (-37.01, 29.26)   | 39.01 (1.31, 76.71)   |
| 24.47 (-20.60, 70.01)  | 52.51 (18.71, 86.33)  | 32.40 (-29.36, 94.97)  | -11.22 (-41.40, 18.37)  | 18.32 (-19.80, 56.56)  | 6.55 (-23.90, 36.73)    | 9.59 (-30.69, 50.08)    | 53.08 (6.12, 98.66)   |
| 13.90 (-32.08, 59.56)  | 41.65 (4.50, 78.72)   | 22.25 (-43.28, 88.47)  | -21.88 (-54.54, 9.92)   | 8.00 (-50.64, 66.79)   | -4.02 (-40.47, 32.53)   | -0.85 (-43.97, 41.75)   | 42.57 (-4.15, 89.81)  |
| 26.05 (-27.00, 78.39)  | 54.09 (8.87, 97.44)   | 33.82 (-35.68, 105.18) | -9.82 (-50.48, 30.90)   | 20.19 (-44.82, 84.19)  | 8.29 (-36.21, 51.93)    | 11.10 (-38.39, 60.17)   | 55.15 (0.50, 106.93)  |
| 7.75 (-46.08, 60.59)   | 35.02 (-8.95, 77.87)  | 15.39 (-24.86, 55.18)  | -28.64 (-70.15, 12.32)  | 11.17 (-61.25, 63.71)  | -10.72 (-48.76, 26.37)  | -7.40 (-55.54, 39.51)   | 36.14 (-17.05, 89.05) |
| 16.96 (-27.38, 61.16)  | 44.31 (12.45, 76.15)  | 24.59 (-34.91, 84.86)  | -19.33 (-48.42, 9.52)   | 10.46 (-43.95, 64.44)  | -1.54 (-25.03, 22.95)   | 1.93 (-36.16, 39.32)    | 45.14 (0.19, 90.19)   |
| 17.87 (-30.10, 65.52)  | 45.42 (7.56, 83.03)   | 25.25 (-39.69, 92.68)  | -18.29 (-50.91, 15.43)  | 11.62 (-46.43, 70.12)  | -0.35 (-36.55, 37.15)   | 2.98 (-40.75, 47.52)    | 46.43 (-1.77, 94.18)  |
| 4.34 (-34.69, 43.37)   | 32.03 (6.34, 58.17)   | 12.17 (-46.50, 72.83)  | -31.78 (-50.54, -12.33) | -1.73 (-51.10, 47.93)  | -13.66 (-36.56, 9.54)   | -10.51 (-43.37, 23.78)  | 32.89 (-5.56, 72.49)  |
| 42.86 (-6.70, 90.94)   | 70.48 (32.13, 109.65) | 50.78 (-15.63, 117.62) | 6.94 (-27.14, 41.97)    | 36.57 (-22.15, 95.38)  | 24.70 (-13.07, 63.31)   | 28.10 (-17.05, 72.01)   | 71.57 (21.15, 119.24) |
| Insulin-liposomal gel  | 27.69 (-10.27, 65.70) | 8.00 (-58.30, 74.17)   | -36.15 (-69.20, -1.47)  | -6.09 (-65.20, 53.38)  | -18.17 (-54.54, 20.47)  | -14.82 (-58.67, 30.10)  | 28.81 (-19.86, 75.89) |
| -27.69 (-65.70, 10.27) | Laser                 | -19.85 (-78.34, 38.84) | -63.68 (-81.37, -45.97) | -33.93 (-84.04, 17.12) | -45.82 (-66.42, -24.87) | -42.67 (-74.78, -10.63) | 112 (-37.79, 39.08)   |
| -8.00 (-74.17, 58.30)  | 19.85 (-38.84, 78.34) | N-acetylcysteine       | -43.60 (-101.04, 13.45) | -14.16 (-88.53, 58.87) | -26.28 (-81.03, 28.45)  | -22.65 (-83.93, 38.51)  | 20.43 (-46.14, 85.44) |
| 36.15 (1.47, 69.20)    | 63.68 (45.97, 81.37)  | 43.60 (-13.45, 101.04) | Placebo                 | 29.69 (-18.27, 77.88)  | 17.85 (-8.0, 34.39)     | 21.04 (-7.20, 49.83)    | 64.55 (8.62, 98.58)   |
| 6.09 (-53.38, 65.20)   | 33.93 (-17.12, 84.04) | 14.16 (-58.87, 88.53)  | -29.69 (-77.88, 18.27)  | Quercetin              | -11.67 (-60.27, 37.36)  | -8.73 (-64.65, 46.73)   | 34.87 (-25.26, 94.47) |
| 18.17 (-20.47, 54.54)  | 45.82 (24.87, 66.42)  | 26.28 (-28.45, 81.03)  | -17.85 (-34.39, -1.80)  | 11.67 (-37.36, 60.27)  | Tiannofolone            | 3.11 (-25.44, 31.10)    | 46.71 (8.08, 83.72)   |
| 14.82 (-30.10, 58.67)  | 42.67 (10.63, 74.78)  | 22.65 (-38.51, 83.93)  | -21.04 (-49.83, 7.20)   | 8.73 (-46.73, 64.65)   | -3.11 (-31.10, 25.44)   | Theater Glycyrrh Oxide  | 43.35 (-1.15, 87.07)  |
| -28.81 (-75.89, 19.86) | -1.12 (-39.08, 37.79) | -20.43 (-85.44, 46.14) | -64.55 (-98.58, -30.82) | -34.87 (-94.47, 25.26) | -46.71 (-83.72, -8.08)  | -43.35 (-87.07, 1.15)   | Zinc                  |

## 1.2 Rank probability(Rank 1 is best, rank N is worst)

| Drug              | Rank 1 | Rank 2 | Rank 3 | Rank 4 | Rank 5 | Rank 6 | Rank 7 | Rank 8 | Rank 9 | Rank 10 | Rank 11 | Rank 12 | Rank 13 | Rank 14 | Rank 15 | Rank 16 | Rank 17 | Rank 18 | Rank 19 |
|-------------------|--------|--------|--------|--------|--------|--------|--------|--------|--------|---------|---------|---------|---------|---------|---------|---------|---------|---------|---------|
| Allicin           | 0      | 0.01   | 0.04   | 0.06   | 0.07   | 0.07   | 0.08   | 0.07   | 0.07   | 0.07    | 0.07    | 0.06    | 0.06    | 0.06    | 0.06    | 0.05    | 0.03    | 0.03    | 0.02    |
| Aloe              | 0      | 0      | 0      | 0      | 0      | 0      | 0.01   | 0.01   | 0.01   | 0.02    | 0.03    | 0.04    | 0.05    | 0.08    | 0.1     | 0.13    | 0.15    | 0.19    | 0.17    |
| Amlexanox         | 0      | 0      | 0.01   | 0.03   | 0.07   | 0.1    | 0.12   | 0.13   | 0.13   | 0.12    | 0.09    | 0.07    | 0.05    | 0.04    | 0.02    | 0.01    | 0       | 0       | 0       |
| Benzylamine       | 0      | 0      | 0      | 0.01   | 0.02   | 0.02   | 0.03   | 0.05   | 0.05   | 0.06    | 0.06    | 0.08    | 0.09    | 0.11    | 0.11    | 0.1     | 0.09    | 0.08    | 0.05    |
| Berberine gelatin | 0      | 0.01   | 0.03   | 0.05   | 0.06   | 0.07   | 0.08   | 0.07   | 0.07   | 0.07    | 0.07    | 0.07    | 0.07    | 0.07    | 0.06    | 0.05    | 0.03    | 0.03    | 0.02    |
| Chitosan          | 0      | 0.01   | 0.02   | 0.03   | 0.03   | 0.04   | 0.04   | 0.04   | 0.04   | 0.04    | 0.05    | 0.05    | 0.05    | 0.07    | 0.08    | 0.08    | 0.08    | 0.11    | 0.14    |
| Chlorhexidine     | 0.01   | 0.03   | 0.06   | 0.12   | 0.11   | 0.09   | 0.07   | 0.07   | 0.06   | 0.06    | 0.05    | 0.05    | 0.05    | 0.05    | 0.04    | 0.03    | 0.03    | 0.03    | 0.01    |
| Curcumin          | 0      | 0      | 0.02   | 0.03   | 0.04   | 0.06   | 0.07   | 0.08   | 0.08   | 0.08    | 0.09    | 0.09    | 0.09    | 0.08    | 0.07    | 0.05    | 0.03    | 0.02    | 0.02    |
| Diosmectite       | 0      | 0.01   | 0.02   | 0.04   | 0.05   | 0.06   | 0.06   | 0.07   | 0.07   | 0.06    | 0.07    | 0.07    | 0.07    | 0.08    | 0.08    | 0.06    | 0.05    | 0.05    | 0.03    |
| Doxycycline       | 0      | 0.01   | 0.04   | 0.1    | 0.15   | 0.16   | 0.14   | 0.11   | 0.09   | 0.07    | 0.05    | 0.03    | 0.02    | 0.01    | 0.01    | 0       | 0       | 0       | 0       |
| Glycyrrhiza       | 0      | 0      | 0      | 0      | 0      | 0.01   | 0.01   | 0.01   | 0.01   | 0.02    | 0.02    | 0.03    | 0.03    | 0.04    | 0.06    | 0.07    | 0.1     | 0.17    | 0.42    |
| Insulin-liposomal | 0.02   | 0.05   | 0.14   | 0.15   | 0.13   | 0.09   | 0.08   | 0.07   | 0.05   | 0.04    | 0.04    | 0.03    | 0.03    | 0.02    | 0.02    | 0.01    | 0.01    | 0.01    | 0       |

|                  |      |      |      |      |      |      |      |      |      |      |      |      |      |      |      |      |      |      |      |
|------------------|------|------|------|------|------|------|------|------|------|------|------|------|------|------|------|------|------|------|------|
| Laser            | 0.32 | 0.42 | 0.17 | 0.06 | 0.02 | 0.01 | 0    | 0    | 0    | 0    | 0    | 0    | 0    | 0    | 0    | 0    | 0    | 0    | 0    |
| N-acetylcysteine | 0.16 | 0.12 | 0.16 | 0.11 | 0.07 | 0.05 | 0.04 | 0.04 | 0.03 | 0.03 | 0.03 | 0.03 | 0.02 | 0.02 | 0.02 | 0.02 | 0.02 | 0.02 | 0.02 |
| Placebo          | 0    | 0    | 0    | 0    | 0    | 0    | 0    | 0    | 0    | 0    | 0    | 0.01 | 0.02 | 0.05 | 0.12 | 0.22 | 0.31 | 0.22 | 0.06 |
| Quercetin        | 0.04 | 0.06 | 0.1  | 0.1  | 0.08 | 0.07 | 0.06 | 0.05 | 0.05 | 0.05 | 0.04 | 0.04 | 0.04 | 0.04 | 0.04 | 0.03 | 0.03 | 0.03 | 0.03 |
| Triamcinolone    | 0    | 0    | 0    | 0    | 0.01 | 0.01 | 0.03 | 0.05 | 0.09 | 0.13 | 0.16 | 0.17 | 0.15 | 0.1  | 0.06 | 0.02 | 0.01 | 0    | 0    |
| TGO              | 0    | 0.01 | 0.02 | 0.04 | 0.05 | 0.07 | 0.08 | 0.08 | 0.08 | 0.08 | 0.09 | 0.08 | 0.09 | 0.07 | 0.06 | 0.04 | 0.02 | 0.02 | 0.01 |
| Zinc             | 0.42 | 0.27 | 0.15 | 0.07 | 0.04 | 0.02 | 0.01 | 0.01 | 0.01 | 0    | 0    | 0    | 0    | 0    | 0    | 0    | 0    | 0    | 0    |

### 1.3 Consistency check

|                                   |                     |
|-----------------------------------|---------------------|
| Parameter                         | Median (95% CI)     |
| Random Effects Standard Deviation | 14.34 (9.10, 25.48) |

### 1.4 Convergence Diagnostics

| Parameter                           | PSRF |                                |
|-------------------------------------|------|--------------------------------|
| d.Benzylamine.Quercetin             | 1.00 |                                |
| d.Chlorhexidine.NacetylcySteine     | 1.00 |                                |
| d.Placebo.Allicin                   | 1.00 |                                |
| d.Placebo.Amlexanox                 | 1.00 |                                |
| d.Placebo.Berberinegelatin          | 1.00 |                                |
| d.Placebo.Chitosan                  | 1.00 |                                |
| d.Placebo.Diosmectite               | 1.00 |                                |
| d.Placebo.Glycyrrhiza               | 1.00 |                                |
| d.Placebo.Insulinliposomalgel       | 1.15 |                                |
| d.Placebo.Zinc                      | 1.00 |                                |
| d.Triamcinolone.Aloe                | 1.00 |                                |
| d.Triamcinolone.Benzylamine         | 1.00 |                                |
| d.Triamcinolone.Chlorhexidine       | 1.00 |                                |
| d.Triamcinolone.Curcumin            | 1.00 |                                |
| d.Triamcinolone.Doxycycline         | 1.00 |                                |
| d.Triamcinolone.Laser               | 1.00 |                                |
| d.Triamcinolone.Placebo             | 1.00 |                                |
| d.Triamcinolone.TriesterGlycerol... | 1.00 |                                |
| sd.d                                | 1.00 |                                |
|                                     |      | Number of chains : 4           |
|                                     |      | Tuning iterations : 20,000     |
|                                     |      | Simulation iterations : 50,000 |
|                                     |      | Thinning interval : 10         |
|                                     |      | Inference samples : 10,000     |
|                                     |      | Variance scaling factor: 2.5   |

## 2.Inconsistency Model

### 2.1 Summary estimates

| Allien                 | -18.78 (-65.21, 26.69)   | 2.95 (-35.40, 40.16)   | -9.16 (-55.76, 37.33)   |
|------------------------|--------------------------|------------------------|-------------------------|
| 18.78 (-2669, 65.21)   | Aloe                     | 21.25 (-13.20, 56.35)  | 9.63 (-32.58, 50.71)    |
| -2.95 (-40.16, 35.40)  | -21.25 (-56.35, 13.20)   | Amlexanox              | -12.14 (-48.43, 24.38)  |
| 9.16 (-37.33, 55.76)   | -9.63 (-50.71, 32.58)    | 12.14 (-24.38, 48.43)  | Benzylamine             |
| 0.72 (-45.93, 46.71)   | -17.81 (-62.99, 26.57)   | 3.43 (-33.40, 40.18)   | -8.38 (-55.11, 36.65)   |
| 12.57 (-40.65, 66.41)  | -6.27 (-56.75, 45.40)    | 15.15 (-28.18, 59.58)  | 3.27 (-47.76, 53.80)    |
| -6.41 (-59.41, 49.52)  | -25.15 (-72.45, 24.04)   | -3.65 (-48.92, 42.11)  | -15.48 (-66.16, 36.37)  |
| 2.58 (-44.47, 48.98)   | -16.31 (-55.22, 22.78)   | 5.21 (-30.24, 40.89)   | -6.89 (-47.79, 34.27)   |
| 4.17 (-44.26, 52.80)   | -14.53 (-60.83, 30.65)   | 6.92 (-32.08, 44.26)   | -4.88 (-52.04, 40.44)   |
| -9.62 (-48.04, 30.78)  | -28.20 (-62.59, 6.77)    | -6.78 (-32.30, 19.09)  | -18.73 (-51.87, 13.62)  |
| 29.41 (-203.4, 79.17)  | 10.89 (-35.88, 57.07)    | 32.22 (-6.22, 71.81)   | 20.64 (-28.03, 66.86)   |
| -14.46 (-61.62, 34.91) | -32.99 (-79.02, 12.30)   | -11.71 (-49.03, 25.86) | -23.57 (-69.96, 23.00)  |
| -41.57 (-84.60, 1.83)  | -60.40 (-97.69, -21.30)  | -38.86 (-70.17, -7.41) | -50.45 (-90.57, -10.36) |
| -22.16 (-89.02, 45.73) | -40.71 (-103.56, 21.16)  | -19.54 (-81.09, 40.52) | -31.75 (-95.96, 33.91)  |
| 22.76 (-116.8, 57.37)  | 3.97 (-26.84, 34.22)     | 25.46 (6.72, 41.99)    | 13.61 (-18.83, 45.00)   |
| -9.27 (-69.85, 51.86)  | -27.72 (-85.93, 30.32)   | -6.05 (-61.02, 46.51)  | -18.36 (-57.79, 20.98)  |
| 3.83 (-35.14, 42.71)   | -16.90 (-68.65, 38.60)   | 6.73 (-17.68, 30.91)   | -5.08 (-38.03, 26.89)   |
| -1.72 (-47.34, 43.93)  | -20.49 (-59.97, 20.08)   | 1.09 (-33.65, 35.95)   | -10.72 (-53.09, 31.13)  |
| -41.38 (-91.44, 7.63)  | -60.14 (-107.37, -14.12) | -38.66 (-79.13, -0.21) | -50.72 (-98.04, -3.96)  |

|                         |                          |                         |                         |                         |                         |                          |                         |                        |                         |                          |                         |                         |
|-------------------------|--------------------------|-------------------------|-------------------------|-------------------------|-------------------------|--------------------------|-------------------------|------------------------|-------------------------|--------------------------|-------------------------|-------------------------|
| -0.72 (-.48.71, 45.93)  | -12.57 (-.66.41, 40.65)  | 6.41 (-.49.52, 59.41)   | -2.58 (-.48.98, 44.47)  | -4.17 (-.52.80, 44.26)  | 9.62 (-.30.78, 48.04)   | -29.41 (-.79.17, 20.34)  | 14.46 (-.34.91, 61.62)  | 41.57 (-1.83, 84.60)   | 22.16 (-.45.73, 89.02)  | -22.76 (-.57.37, 11.68)  | 9.27 (-.51.86, 69.85)   | -3.83 (-.42.71, 35.14)  |
| 17.81 (-.26.57, 62.99)  | 6.27 (-.45.40, 56.75)    | 25.15 (-.24.04, 72.45)  | 16.31 (-.22.78, 55.22)  | 14.53 (-.30.65, 60.83)  | 28.20 (-.6.77, 62.59)   | -10.89 (-.57.07, 35.88)  | 32.99 (-12.30, 79.02)   | 60.40 (21.30, 97.69)   | 40.71 (-.21.16, 103.56) | -3.97 (-.34.22, 26.84)   | 27.72 (-.30.32, 85.93)  | 16.90 (-.38.60, 68.65)  |
| -3.43 (-.40.18, 33.40)  | -15.15 (-.59.58, 28.18)  | 3.65 (-.42.11, 48.92)   | -5.21 (-.40.89, 30.24)  | -6.92 (-.44.26, 32.08)  | 6.78 (-19.09, 32.30)    | -32.22 (-.71.81, 6.22)   | 11.71 (-.25.86, 49.03)  | 38.86 (7.41, 70.17)    | 19.54 (-.40.52, 81.09)  | -25.46 (-.41.99, -8.72)  | 6.05 (-.46.51, 61.02)   | -6.73 (-.30.91, 17.68)  |
| 8.38 (-.36.65, 55.11)   | -3.27 (-.53.80, 47.76)   | 15.48 (-.36.37, 66.16)  | 6.88 (-.34.27, 47.79)   | 4.88 (-.40.44, 52.04)   | 18.73 (-13.62, 51.87)   | -20.64 (-.68.86, 28.03)  | 23.57 (-.23.00, 69.96)  | 50.45 (10.36, 90.57)   | 31.75 (-.33.91, 95.96)  | -13.61 (-.45.00, 18.83)  | 18.36 (-.20.98, 57.79)  | 5.08 (-.26.88, 38.03)   |
| Berberine gelatin       | -11.66 (-.64.28, 40.48)  | 7.23 (-.46.80, 60.00)   | -1.59 (-.47.52, 43.14)  | -3.38 (-.50.05, 43.86)  | 10.51 (-.28.47, 47.58)  | -28.68 (-.77.02, 19.66)  | 15.53 (-.32.13, 61.06)  | 42.20 (0.57, 84.64)    | 22.84 (-.44.08, 90.71)  | -21.86 (-.54.39, 10.44)  | 9.79 (-.49.71, 70.99)   | -3.33 (-.39.97, 33.91)  |
| 11.66 (-.40.48, 64.28)  | Chitosan                 | 18.89 (-41.23, 77.45)   | 10.19 (-.40.76, 60.18)  | 8.33 (-.44.28, 60.85)   | 22.13 (-.22.08, 66.53)  | -17.10 (-.71.74, 36.68)  | 26.88 (-.24.02, 80.19)  | 53.90 (5.59, 101.93)   | 34.71 (-.37.43, 107.40) | -10.21 (-.49.40, 31.04)  | 21.59 (-43.26, 86.73)   | 8.52 (-.35.55, 52.63)   |
| -7.23 (-.60.00, 46.80)  | Chitosan                 | Chitosan                | -8.88 (-.54.63, 38.01)  | -10.63 (-.63.88, 44.87) | 2.79 (-41.72, 49.92)    | -35.77 (-.90.50, 19.83)  | 7.90 (-.45.58, 62.18)   | 35.20 (-12.10, 81.24)  | 15.95 (-.24.72, 56.45)  | -29.33 (-.70.81, 13.95)  | 2.72 (-.60.08, 66.99)   | -10.21 (-47.88, 29.56)  |
| 1.59 (-.43.14, 47.52)   | -10.19 (-.60.18, 40.76)  | 8.88 (-.38.01, 54.69)   | Curcumin                | -2.06 (-.47.03, 44.56)  | 12.03 (-.23.28, 46.83)  | -27.23 (-.74.62, 20.50)  | 16.92 (-.28.25, 62.71)  | 43.77 (8.58, 80.13)    | 24.88 (-.36.31, 86.79)  | -20.30 (-.50.81, 11.29)  | 11.52 (-45.11, 67.67)   | -1.67 (-.26.54, 23.57)  |
| 3.38 (-.43.86, 50.05)   | -8.33 (-.60.85, 44.28)   | 10.63 (-44.87, 63.88)   | 2.06 (-44.56, 47.03)    | Diosgenin               | 13.86 (-.26.32, 52.45)  | -25.40 (-.74.10, 22.90)  | 18.84 (-.29.95, 65.12)  | 45.54 (2.93, 88.33)    | 26.81 (-.41.49, 92.99)  | -18.46 (-.52.80, 15.38)  | 13.39 (-47.39, 72.76)   | 0.30 (-.38.71, 38.67)   |
| -10.51 (-47.58, 28.47)  | -22.13 (-.66.53, 22.08)  | -2.79 (-49.92, 41.72)   | -12.03 (-46.63, 23.28)  | 13.86 (-.26.32, 52.45)  | Diosgenin               | -39.18 (-.78.49, 1.16)   | 5.00 (-.34.35, 44.31)   | 31.88 (0.43, 64.11)    | 12.83 (-.47.43, 74.05)  | -32.39 (-.51.35, -12.47) | -0.29 (-50.48, 50.52)   | -13.51 (-37.09, 11.36)  |
| 28.68 (-.19.66, 77.02)  | 17.10 (-.36.88, 71.74)   | 35.77 (-19.83, 90.50)   | 27.23 (-.20.50, 74.82)  | 25.40 (-.22.90, 74.10)  | 39.18 (-1.16, 78.49)    | Glycyrrhiza              | 43.66 (-4.16, 91.84)    | 70.96 (27.05, 115.51)  | 51.63 (-17.37, 120.45)  | 6.74 (-.27.23, 41.96)    | 38.63 (-.22.05, 100.18) | 25.62 (-12.61, 65.95)   |
| -15.53 (-.61.06, 32.13) | -26.88 (-.80.19, 24.02)  | -7.90 (-.62.18, 45.58)  | -16.92 (-.62.71, 28.25) | -18.84 (-.65.12, 29.95) | -5.00 (-.44.31, 34.35)  | -43.66 (-.91.84, 4.16)   | Insulin-hicosemal gel   | 26.77 (-15.79, 70.98)  | 7.66 (-.59.79, 75.48)   | -37.40 (-.70.22, -3.12)  | -5.15 (-.65.78, 56.75)  | -18.52 (-.56.32, 20.38) |
| -42.20 (-.84.64, -0.57) | -53.90 (-.101.93, -5.59) | -35.20 (-.81.24, 12.10) | -43.77 (-.80.13, -8.58) | -45.54 (-.88.33, -2.93) | -31.88 (-.64.11, -0.43) | -70.96 (-115.51, -27.05) | -26.77 (-.70.98, 15.79) | Liver                  | -19.17 (-.80.25, 42.48) | -63.64 (-.82.60, -44.84) | -32.53 (-.87.20, 23.80) | -45.42 (-71.49, -18.92) |
| -22.84 (-.90.71, 44.08) | -34.71 (-.107.40, 37.43) | -15.85 (-.56.45, 24.72) | -24.88 (-.66.79, 38.31) | -26.81 (-.92.99, 41.49) | -12.83 (-.74.05, 47.43) | -51.63 (-120.45, 17.37)  | -7.66 (-75.48, 59.79)   | 19.17 (-42.48, 80.25)  | N-acetylcholine         | -45.10 (-102.97, 13.82)  | -13.57 (-89.02, 62.07)  | -26.19 (-83.00, 29.52)  |
| 21.86 (-10.44, 54.39)   | 10.21 (-.31.04, 49.40)   | 29.33 (-13.95, 70.81)   | 20.30 (-11.29, 50.81)   | 18.46 (-15.38, 52.80)   | 32.29 (12.47, 51.35)    | -6.74 (-41.96, 27.23)    | 37.40 (3.12, 70.22)     | 63.64 (44.84, 82.60)   | 45.10 (-13.82, 102.97)  | Pinebello                | 31.66 (-18.93, 82.55)   | 16.82 (-31.92, 67.53)   |
| -9.79 (-.70.99, 49.71)  | -21.59 (-.86.73, 43.26)  | -2.72 (-.66.99, 60.08)  | -11.52 (-.67.67, 45.11) | -13.39 (-.72.76, 47.39) | 0.29 (-.50.52, 50.48)   | -38.63 (-100.18, 22.05)  | 5.15 (-.56.75, 65.78)   | 32.53 (-.23.80, 87.20) | 13.57 (-.62.07, 89.02)  | -31.66 (-.82.55, 18.93)  | Quercetin               | -13.02 (-.64.04, 38.10) |
| 3.33 (-.33.91, 39.97)   | -8.52 (-.52.63, 35.55)   | 10.21 (-.29.56, 47.88)  | 1.67 (-.23.57, 26.54)   | -0.30 (-.38.67, 38.71)  | 13.51 (-11.36, 37.09)   | -25.62 (-.65.95, 12.61)  | 18.52 (-.20.28, 56.32)  | 45.42 (18.92, 71.49)   | 26.19 (-.29.52, 83.00)  | -16.82 (-.67.53, 31.92)  | 13.02 (-.38.10, 64.04)  | Tranexamine             |
| -2.38 (-.47.34, 41.74)  | -14.19 (-.65.58, 37.09)  | 4.91 (-.44.46, 52.11)   | -3.92 (-.43.52, 35.22)  | -5.88 (-.51.82, 39.28)  | 8.02 (-.26.74, 41.63)   | -31.18 (-.78.29, 15.15)  | 12.79 (-.32.48, 57.74)  | 39.84 (2.68, 77.59)    | 20.86 (-.43.28, 85.22)  | -22.01 (-.78.08, 29.99)  | 7.40 (-.49.63, 64.43)   | -5.64 (-.35.54, 24.66)  |
| -42.50 (-.89.36, 4.75)  | -54.03 (-108.12, -0.53)  | -35.16 (-.91.24, 19.08) | -43.84 (-.91.67, 2.50)  | -45.95 (-.95.58, 2.58)  | -31.78 (-73.13, 7.35)   | -71.11 (-120.78, -20.91) | -26.94 (-.76.39, 20.48) | -0.01 (-.44.06, 43.51) | -19.29 (-.87.32, 49.67) | -64.24 (-.99.51, -29.05) | -32.09 (-.94.98, 29.22) | -45.39 (-.84.43, -6.61) |



|                         |                       |
|-------------------------|-----------------------|
| 1.72 (-43.93, 47.34)    | 41.38 (-7.63, 91.44)  |
| 20.49 (-20.08, 59.97)   | 60.14 (14.12, 107.37) |
| -1.09 (-35.95, 33.65)   | 38.66 (0.21, 79.13)   |
| 10.72 (-31.13, 53.09)   | 50.72 (3.96, 98.04)   |
| 2.38 (-41.74, 47.34)    | 42.50 (-4.75, 89.36)  |
| 14.19 (-37.09, 65.59)   | 54.03 (0.53, 108.12)  |
| -4.91 (-52.11, 44.46)   | 35.16 (-19.08, 91.24) |
| 3.92 (-35.22, 43.52)    | 43.84 (-2.50, 91.67)  |
| 5.88 (-39.28, 51.82)    | 45.55 (-2.58, 95.58)  |
| -8.02 (-41.63, 26.74)   | 31.78 (-7.35, 73.13)  |
| 31.18 (-15.15, 78.29)   | 71.11 (20.91, 120.78) |
| -12.79 (-57.74, 32.48)  | 26.94 (-20.48, 76.39) |
| -39.84 (-77.59, -2.68)  | 0.01 (-43.51, 44.06)  |
| -20.86 (-85.22, 43.28)  | 19.29 (-49.67, 87.32) |
| 22.01 (-29.99, 78.08)   | 64.24 (29.05, 99.51)  |
| -7.40 (-64.43, 49.63)   | 32.09 (-29.22, 94.98) |
| 5.64 (-24.86, 35.54)    | 45.39 (6.61, 84.43)   |
| Triester Glycerol Oxide | 40.24 (-6.34, 85.81)  |
| -40.24 (-85.81, 6.34)   | Zinc                  |

## 2.3 Variance Calculation

| Cycle                                      | Median (95% CI)       |
|--------------------------------------------|-----------------------|
| Doxycycline, Laser, Placebo, Triamcinolone | -0.11 (-28.97, 26.24) |
| Doxycycline, Placebo, Triamcinolone        | -1.01 (-48.44, 46.21) |
| Doxycycline, Placebo, Triamcinolone        | -1.01 (-48.44, 46.21) |
| Doxycycline, Placebo, Triamcinolone        | -1.01 (-48.44, 46.21) |

## 2.4 Convergence Diagnostics

| Parameter                           | PSRF |                                |
|-------------------------------------|------|--------------------------------|
| d.Benzydamine.Quercetin             | 1.00 |                                |
| d.Chlorhexidine.Nacetylcysteine     | 1.00 |                                |
| d.Placebo.Allicin                   | 1.00 |                                |
| d.Placebo.Amlexanox                 | 1.00 |                                |
| d.Placebo.Berberinegelatin          | 1.00 |                                |
| d.Placebo.Chitosan                  | 1.00 |                                |
| d.Placebo.Diosmectite               | 1.00 |                                |
| d.Placebo.Glycyrrhiza               | 1.00 |                                |
| d.Placebo.Insulinliposomalgel       | 1.15 |                                |
| d.Placebo.Zinc                      | 1.00 |                                |
| d.Triamcinolone.Aloe                | 1.00 |                                |
| d.Triamcinolone.Benzydamine         | 1.00 |                                |
| d.Triamcinolone.Chlorhexidine       | 1.00 |                                |
| d.Triamcinolone.Curcumin            | 1.00 |                                |
| d.Triamcinolone.Doxycycline         | 1.00 |                                |
| d.Triamcinolone.Laser               | 1.00 |                                |
| d.Triamcinolone.Placebo             | 1.00 |                                |
| d.Triamcinolone.TriesterGlycerol... | 1.00 |                                |
| sd.d                                | 1.00 |                                |
|                                     |      | Number of chains : 4           |
|                                     |      | Tuning iterations : 20,000     |
|                                     |      | Simulation iterations : 50,000 |
|                                     |      | Thinning interval : 10         |
|                                     |      | Inference samples : 10,000     |
|                                     |      | Variance scaling factor: 2.5   |

## 3. Node-splitting analysis

| Parameter                         | Median (95% CI)     |
|-----------------------------------|---------------------|
| Random Effects Standard Deviation | 14.66 (8.97, 26.74) |
| Inconsistency Standard Deviation  | 11.28 (0.65, 69.10) |

## 4. Network structure

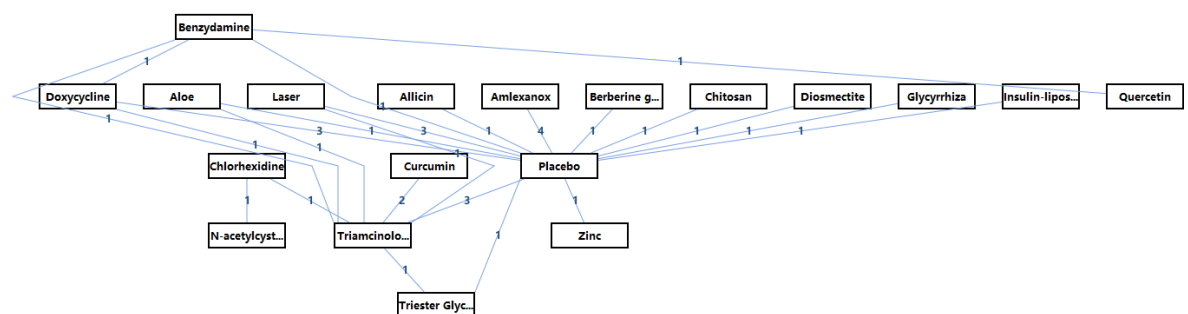

Day 5

1. Consistency Model

1.1 Summary estimates

|                         |                        |                        |                        |                         |                         |                        |                        |                        |                         |                        |                       |                        |
|-------------------------|------------------------|------------------------|------------------------|-------------------------|-------------------------|------------------------|------------------------|------------------------|-------------------------|------------------------|-----------------------|------------------------|
| Alice                   | 8.86 (-34.03, 54.31)   | 40.15 (-21.48, 103.51) | 33.83 (-21.19, 89.33)  | 16.53 (-48.51, 82.12)   | 0.65 (-59.35, 59.48)    | 6.78 (-45.80, 57.36)   | 5.35 (-41.26, 51.94)   | 31.93 (-23.22, 87.73)  | -14.62 (-55.44, 26.91)  | -7.62 (-58.41, 44.39)  | 312.9 (-8.86, 72.31)  | 37.71 (-22.07, 100.28) |
| -8.86 (-54.31, 34.03)   | Anthracene             | 30.70 (-26.60, 90.64)  | 24.78 (-25.34, 73.95)  | 7.64 (-40.60, 56.12)    | -8.22 (-59.91, 42.20)   | -2.21 (-44.11, 38.08)  | -3.32 (-35.40, 27.19)  | 23.19 (-19.68, 64.48)  | -23.48 (-50.39, 2.53)   | -15.94 (-57.61, 24.04) | 22.39 (-11.79, 55.08) | 29.32 (-22.30, 81.54)  |
| -40.15 (-103.51, 21.48) | Chlorhexidine          | -6.54 (-69.60, 52.82)  | -23.66 (-99.03, 50.89) | -39.41 (-115.39, 31.93) | -33.64 (-102.48, 32.39) | -34.69 (-98.69, 25.04) | -8.20 (-78.63, 60.39)  | -54.53 (-115.42, 1.51) | -47.45 (-114.95, 17.31) | -8.55 (-57.85, 38.29)  | -2.52 (-76.59, 71.65) |                        |
| -33.83 (-89.33, 21.19)  | -24.78 (-73.95, 25.34) | 6.54 (-52.82, 69.60)   | Curcumin               | -17.33 (-85.54, 51.75)  | -33.07 (-98.34, 33.88)  | -26.98 (-85.87, 31.60) | -28.54 (-81.91, 25.78) | -1.63 (-64.20, 60.28)  | -48.26 (-97.21, 3.09)   | -40.99 (-99.36, 18.63) | -2.32 (-39.13, 34.99) | 4.60 (-62.42, 72.38)   |
| -16.53 (-82.12, 48.51)  | -7.64 (-56.12, 40.60)  | 23.66 (-50.89, 99.03)  | 17.33 (-51.75, 85.54)  | Dexamethasone           | -15.66 (-86.31, 53.23)  | -9.65 (-76.10, 52.55)  | -10.62 (-69.76, 45.65) | 15.85 (-50.92, 78.16)  | -30.66 (-86.97, 22.81)  | -23.97 (-87.52, 39.27) | 15.06 (-42.91, 72.14) | 21.50 (-51.36, 93.60)  |
| -0.65 (-59.48, 59.35)   | 8.22 (-42.26, 59.91)   | 39.41 (-31.93, 115.39) | 33.07 (-33.88, 98.34)  | 15.66 (-53.23, 86.31)   | Dioemetic               | 5.93 (-48.04, 59.81)   | 4.94 (-44.54, 54.21)   | 31.68 (-29.95, 90.27)  | -15.01 (-59.17, 28.45)  | -7.90 (-61.36, 46.38)  | 30.67 (-23.00, 86.79) | 37.54 (-25.09, 101.16) |
| -6.78 (-57.36, 45.80)   | 2.21 (-38.08, 44.11)   | 33.64 (-32.39, 102.48) | 26.98 (-31.60, 85.87)  | 9.65 (-52.55, 76.10)    | -5.93 (-59.91, 48.04)   | Dicyclics              | -1.01 (-40.02, 37.66)  | 25.19 (-23.74, 76.13)  | -21.07 (-52.64, 10.92)  | -13.80 (-58.49, 31.97) | 24.90 (-20.66, 71.09) | 31.58 (-21.76, 86.47)  |
| -5.35 (-51.84, 41.26)   | 3.32 (-27.19, 35.40)   | 34.69 (-25.04, 98.69)  | 28.54 (-25.78, 81.91)  | 10.62 (-45.65, 69.76)   | -4.94 (-54.21, 44.54)   | Glycyrrhiza            | 26.88 (-14.92, 67.45)  | -20.08 (-41.31, 2.53)  | -12.65 (-51.28, 25.92)  | 25.77 (-12.07, 64.73)  | 32.65 (-16.17, 83.59) |                        |
| -31.93 (-87.73, 23.22)  | -23.19 (-64.48, 19.68) | 8.20 (-60.39, 78.63)   | 1.63 (-60.28, 64.20)   | -15.85 (-76.16, 50.92)  | -31.68 (-90.27, 29.95)  | -25.19 (-76.13, 23.74) | -26.88 (-67.45, 14.92) | Laser                  | -46.59 (-85.72, -6.63)  | -39.21 (-89.55, 12.84) | -0.36 (-49.94, 49.34) | 5.92 (-53.31, 67.63)   |
| 14.62 (-26.91, 55.44)   | 23.48 (-2.53, 50.39)   | 54.53 (-1.51, 115.42)  | 48.26 (-3.09, 97.21)   | 30.66 (-22.81, 86.97)   | 15.01 (-28.45, 59.17)   | 21.07 (-10.92, 52.64)  | 20.08 (-2.53, 41.31)   | 46.59 (-6.63, 85.72)   | Placeto                 | 7.18 (-24.35, 38.85)   | 45.80 (12.78, 79.09)  | 52.81 (9.11, 98.47)    |
| 7.62 (-44.39, 58.41)    | 15.94 (-24.04, 57.81)  | 47.45 (-17.31, 114.95) | 40.99 (-18.63, 99.36)  | 23.97 (-39.27, 87.52)   | 7.90 (-46.38, 61.36)    | 13.80 (-31.97, 59.49)  | 12.65 (-25.92, 51.28)  | 39.21 (-12.84, 89.55)  | -7.18 (-38.85, 24.35)   | Pichonics              | 38.73 (-6.15, 84.22)  | 45.70 (-9.48, 99.63)   |
| -31.29 (-72.31, 8.86)   | -22.39 (-55.08, 11.79) | 8.55 (-38.29, 57.85)   | 2.32 (-34.99, 39.13)   | -15.06 (-72.14, 42.91)  | -30.67 (-86.79, 23.00)  | -24.90 (-71.09, 20.66) | -25.77 (-64.73, 12.07) | 0.36 (-49.34, 49.94)   | -45.80 (-79.09, -12.78) | -38.73 (-94.22, 6.15)  | Therapeutic           | 6.61 (-48.82, 63.15)   |
| -37.71 (-100.28, 22.07) | -29.32 (-81.54, 22.30) | 2.52 (-71.65, 76.59)   | -4.60 (-72.38, 62.42)  | -21.50 (-93.60, 51.36)  | -37.54 (-101.16, 25.09) | -31.58 (-86.47, 21.76) | -32.65 (-83.53, 16.17) | -5.92 (-67.63, 53.31)  | -52.81 (-98.47, -9.11)  | -45.70 (-99.63, 9.48)  | -6.61 (-63.15, 48.82) | Zinc                   |

1.2 Rank probability(Rank 1 is best, rank N is worst)

| Drug          | Rank 1 | Rank 2 | Rank 3 | Rank 4 | Rank 5 | Rank 6 | Rank 7 | Rank 8 | Rank 9 | Rank 10 | Rank 11 | Rank 12 | Rank 13 |
|---------------|--------|--------|--------|--------|--------|--------|--------|--------|--------|---------|---------|---------|---------|
| Aloe          | 0      | 0.01   | 0.02   | 0.03   | 0.05   | 0.08   | 0.09   | 0.1    | 0.12   | 0.13    | 0.13    | 0.11    | 0.14    |
| Amlexanox     | 0      | 0      | 0.01   | 0.03   | 0.07   | 0.13   | 0.2    | 0.2    | 0.16   | 0.11    | 0.06    | 0.02    | 0.01    |
| Chlorhexidine | 0.31   | 0.18   | 0.13   | 0.1    | 0.07   | 0.05   | 0.04   | 0.03   | 0.02   | 0.02    | 0.01    | 0.01    | 0.01    |
| Curcumin      | 0.16   | 0.19   | 0.16   | 0.13   | 0.11   | 0.08   | 0.05   | 0.04   | 0.03   | 0.02    | 0.02    | 0.01    | 0.01    |
| Dexamethasone | 0.07   | 0.08   | 0.08   | 0.08   | 0.1    | 0.11   | 0.09   | 0.08   | 0.07   | 0.06    | 0.06    | 0.05    | 0.07    |
| Diosmectite   | 0.01   | 0.02   | 0.03   | 0.04   | 0.05   | 0.07   | 0.08   | 0.09   | 0.11   | 0.12    | 0.12    | 0.11    | 0.15    |
| Doxycycline   | 0.01   | 0.02   | 0.03   | 0.05   | 0.07   | 0.11   | 0.12   | 0.13   | 0.13   | 0.13    | 0.1     | 0.06    | 0.04    |
| Glycyrrhiza   | 0      | 0      | 0.01   | 0.03   | 0.05   | 0.09   | 0.14   | 0.17   | 0.19   | 0.17    | 0.1     | 0.04    | 0.01    |
| Laser         | 0.14   | 0.18   | 0.14   | 0.14   | 0.14   | 0.09   | 0.06   | 0.04   | 0.03   | 0.02    | 0.01    | 0.01    | 0       |
| Placebo       | 0      | 0      | 0      | 0      | 0      | 0      | 0      | 0.01   | 0.02   | 0.07    | 0.2     | 0.37    | 0.34    |
| Probiotics    | 0      | 0      | 0.01   | 0.01   | 0.02   | 0.04   | 0.05   | 0.07   | 0.09   | 0.13    | 0.17    | 0.19    | 0.21    |
| Triamcinolone | 0.03   | 0.13   | 0.25   | 0.24   | 0.18   | 0.08   | 0.04   | 0.02   | 0.01   | 0.01    | 0       | 0       | 0       |
| Zinc          | 0.27   | 0.18   | 0.13   | 0.11   | 0.1    | 0.07   | 0.05   | 0.03   | 0.02   | 0.02    | 0.01    | 0.01    | 0.01    |

1.3 Consistency check

|                                   |                      |
|-----------------------------------|----------------------|
| Parameter                         | Median (95% CI)      |
| Random Effects Standard Deviation | 18.93 (11.29, 37.41) |

1.4 Convergence Diagnostics

| Parameter                     | PSRF |                                                                                                                                                                                                                                 |
|-------------------------------|------|---------------------------------------------------------------------------------------------------------------------------------------------------------------------------------------------------------------------------------|
| d.Amlexanox.Dexamethasone     | 1.00 | <div>Number of chains : 4</div> <div>Tuning iterations : 20,000</div> <div>Simulation iterations : 50,000</div> <div>Thinning interval : 10</div> <div>Inference samples : 10,000</div> <div>Variance scaling factor: 2.5</div> |
| d.Placebo.Aloe                | 1.00 |                                                                                                                                                                                                                                 |
| d.Placebo.Amlexanox           | 1.00 |                                                                                                                                                                                                                                 |
| d.Placebo.Diosmectite         | 1.00 |                                                                                                                                                                                                                                 |
| d.Placebo.Doxycycline         | 1.00 |                                                                                                                                                                                                                                 |
| d.Placebo.Glycyrrhiza         | 1.01 |                                                                                                                                                                                                                                 |
| d.Placebo.Laser               | 1.00 |                                                                                                                                                                                                                                 |
| d.Placebo.Probiotics          | 1.00 |                                                                                                                                                                                                                                 |
| d.Placebo.Triamcinolone       | 1.00 |                                                                                                                                                                                                                                 |
| d.Placebo.Zinc                | 1.00 |                                                                                                                                                                                                                                 |
| d.Triamcinolone.Chlorhexidine | 1.00 |                                                                                                                                                                                                                                 |
| d.Triamcinolone.Curcumin      | 1.00 |                                                                                                                                                                                                                                 |
| sd.d                          | 1.00 |                                                                                                                                                                                                                                 |

2.Inconsistency Model

2.1 Summary estimates

|                         |                         |                        |
|-------------------------|-------------------------|------------------------|
| Aloe                    | -2.13 (-53.22, 53.94)   | 36.70 (-26.63, 103.43) |
| 2.13 (-53.94, 53.22)    | Amlexanox               | 39.07 (-24.02, 99.89)  |
| -36.70 (-103.43, 26.63) | -39.07 (-99.89, 24.02)  | Chlorhexidine          |
| -29.95 (-89.24, 25.51)  | -31.87 (-83.62, 23.28)  | 7.30 (-54.10, 68.97)   |
| -5.49 (-82.50, 64.65)   | -7.98 (-55.72, 40.00)   | 31.58 (-48.75, 106.07) |
| -4.61 (-64.36, 60.71)   | -6.19 (-65.21, 59.06)   | 32.95 (-40.04, 111.49) |
| -10.05 (-61.46, 45.43)  | -11.29 (-63.57, 43.59)  | 26.59 (-40.02, 99.42)  |
| -10.37 (-55.15, 40.47)  | 0.25 (-35.80, 37.60)    | 26.86 (-34.44, 95.64)  |
| -19.27 (-86.67, 44.52)  | -21.38 (-83.26, 22.80)  | 18.04 (-55.32, 90.10)  |
| 10.85 (-29.96, 55.36)   | 20.38 (-37.20, 70.85)   | 48.25 (-10.69, 112.01) |
| 4.00 (-48.26, 59.07)    | 2.61 (-49.78, 57.98)    | 41.24 (-26.46, 112.04) |
| -27.94 (-74.25, 14.52)  | -30.21 (-67.81, 8.74)   | 9.32 (-39.56, 56.63)   |
| -41.82 (-102.81, 20.11) | -43.30 (-105.33, 20.96) | -4.43 (-81.27, 73.48)  |

|                        |                         |                         |                        |                        |                        |                         |                         |                        |                        |
|------------------------|-------------------------|-------------------------|------------------------|------------------------|------------------------|-------------------------|-------------------------|------------------------|------------------------|
| 29.95 (-25.51, 89.24)  | 5.49 (-64.65, 82.50)    | 4.61 (-60.71, 64.36)    | 10.05 (-45.43, 61.46)  | 10.37 (-40.47, 55.15)  | 19.27 (-44.52, 86.67)  | -10.85 (-55.36, 29.96)  | -4.00 (-59.07, 48.26)   | 27.94 (-14.52, 74.25)  | 41.82 (-20.11, 102.81) |
| 31.87 (-23.28, 83.62)  | 7.96 (-40.00, 55.72)    | 6.19 (-59.06, 65.21)    | 11.29 (-43.59, 63.57)  | -0.25 (-37.60, 35.80)  | 21.38 (-22.80, 63.26)  | -20.38 (-70.85, 37.20)  | -2.61 (-57.98, 49.78)   | 30.21 (-8.74, 67.81)   | 43.30 (-20.96, 105.33) |
| -7.30 (-88.97, 54.10)  | -31.58 (-108.07, 48.75) | -32.95 (-111.49, 40.04) | -26.59 (-99.42, 40.02) | -26.86 (-95.64, 34.44) | -18.04 (-90.10, 55.32) | -48.25 (-112.01, 10.69) | -41.24 (-112.04, 28.46) | -9.32 (-56.63, 39.56)  | 4.43 (-73.48, 81.27)   |
| Curcumin               | -24.36 (-94.70, 49.58)  | -25.14 (-97.05, 40.50)  | -19.49 (-84.31, 39.15) | -19.91 (-78.89, 34.00) | -10.75 (-75.68, 56.73) | -40.72 (-96.72, 10.25)  | -33.89 (-98.24, 25.81)  | -1.57 (-38.69, 35.21)  | 11.88 (-59.52, 80.21)  |
| 24.36 (-49.58, 94.70)  | Decamethasone           | -1.95 (-85.80, 73.73)   | 3.95 (-73.53, 73.58)   | 3.84 (-65.84, 67.97)   | 13.51 (-52.28, 75.90)  | -17.17 (-86.10, 45.65)  | -9.77 (-85.99, 59.48)   | 22.60 (-40.71, 82.25)  | 36.17 (-47.11, 112.12) |
| 25.14 (-40.50, 97.05)  | Dexamethasone           | 5.77 (-49.67, 62.07)    | 5.56 (-46.14, 56.84)   | 15.23 (-54.82, 88.27)  | -15.68 (-60.10, 30.20) | -8.23 (-63.55, 48.60)   | -13.97 (-58.97, 31.71)  | 23.72 (-32.06, 86.88)  | 37.40 (-27.23, 103.36) |
| 19.49 (-39.15, 84.31)  | -3.95 (-73.58, 73.53)   | -5.77 (-62.07, 49.67)   | Doxycycline            | 0.23 (-42.68, 40.31)   | 9.89 (-53.96, 74.72)   | -21.09 (-53.81, 10.84)  | -13.97 (-58.97, 31.71)  | 18.04 (-29.01, 71.84)  | 31.55 (-24.44, 88.99)  |
| 19.91 (-34.00, 78.89)  | -3.84 (-67.97, 65.84)   | -5.56 (-56.84, 46.14)   | -0.23 (-40.31, 42.88)  | Glycyrrhiza            | 21.85 (-22.79, 64.44)  | -21.34 (-45.65, 4.02)   | -13.93 (-55.00, 27.11)  | 18.08 (-21.20, 63.73)  | 31.48 (-21.04, 86.36)  |
| 10.75 (-56.73, 75.68)  | -13.51 (-75.90, 52.28)  | -15.23 (-88.27, 54.82)  | -9.89 (-74.72, 53.96)  | -21.85 (-64.44, 22.79) | Laser                  | -41.82 (-98.70, 25.67)  | -24.30 (-89.28, 41.17)  | 8.97 (-44.02, 63.20)   | 21.85 (-50.03, 92.80)  |
| 40.72 (-10.25, 96.72)  | 17.17 (-45.65, 86.10)   | 15.68 (-30.20, 60.10)   | 21.09 (-10.84, 53.81)  | 21.34 (-4.02, 45.65)   | 41.82 (-25.67, 98.70)  | Placebo                 | 7.21 (-24.85, 39.58)    | 39.41 (32.8, 80.37)    | 52.66 (8.03, 99.50)    |
| 33.69 (-25.81, 98.24)  | 9.77 (-59.48, 85.99)    | 8.23 (-48.60, 63.55)    | 13.97 (-31.71, 58.97)  | 13.93 (-27.11, 55.00)  | 24.30 (-41.17, 89.28)  | -7.21 (-39.58, 24.85)   | Probiotics              | 32.17 (-15.07, 84.84)  | 45.68 (-11.20, 102.41) |
| 1.57 (-35.21, 38.69)   | -22.60 (-82.25, 40.71)  | -23.72 (-86.88, 32.06)  | -18.04 (-71.84, 29.01) | -18.08 (-63.73, 21.20) | -8.97 (-63.20, 44.02)  | -39.41 (-80.37, -3.28)  | -32.17 (-84.84, 15.07)  | Triamcinolone          | 13.72 (-48.70, 70.60)  |
| -11.88 (-80.21, 59.52) | -36.17 (-112.12, 47.11) | -37.40 (-103.36, 27.23) | -31.55 (-88.99, 24.44) | -31.48 (-86.56, 21.04) | -21.85 (-92.80, 50.03) | -52.66 (-99.50, -8.03)  | -45.68 (-102.41, 11.20) | -13.72 (-70.60, 48.70) | Zinc                   |

## 2.2 Inconsistency Factors

| Cycle                                          | Median (95% CI)       |
|------------------------------------------------|-----------------------|
| Amlexanox, Glycyrrhiza, Placebo, Triamcinolone | -6.32 (-61.36, 25.69) |
| Amlexanox, Placebo, Triamcinolone              | -4.90 (-66.70, 35.23) |
| Amlexanox, Placebo, Triamcinolone              | -4.90 (-66.70, 35.23) |

### 2.3 Variance Calculation

| Parameter                         | Median (95% CI)      |
|-----------------------------------|----------------------|
| Random Effects Standard Deviation | 18.78 (10.27, 39.91) |
| Inconsistency Standard Deviation  | 22.19 (0.97, 58.63)  |

### 2.4 Convergence Diagnostics

| Parameter                          | PSRF |  |
|------------------------------------|------|--|
| d.Aloe.Placebo                     | 1.00 |  |
| d.Amlexanox.Dexamethasone          | 1.00 |  |
| d.Amlexanox.Laser                  | 1.00 |  |
| d.Placebo.Diosmectite              | 1.00 |  |
| d.Placebo.Doxycycline              | 1.00 |  |
| d.Placebo.Glycyrrhiza              | 1.01 |  |
| d.Placebo.Probiotics               | 1.00 |  |
| d.Placebo.Triamcinolone            | 1.00 |  |
| d.Placebo.Zinc                     | 1.00 |  |
| d.Triamcinolone.Amlexanox          | 1.00 |  |
| d.Triamcinolone.Chlorhexidine      | 1.00 |  |
| d.Triamcinolone.Curcumin           | 1.00 |  |
| w.Amlexanox.Glycyrrhiza.Placebo... | 1.00 |  |
| w.Amlexanox.Placebo.Triamcinol...  | 1.00 |  |
| w.Amlexanox.Placebo.Triamcinol...  | 1.00 |  |
| sd.d                               | 1.01 |  |
| sd.w                               | 1.00 |  |

Number of chains : 4

Tuning iterations : 20,000

Simulation iterations : 50,000

Thinning interval : 10

Inference samples : 10,000

Variance scaling factor: 2.5

### 3. Node-splitting analysis

| Name                     | Direct Effect          | Indirect Effect        | Overall               | P-Value |
|--------------------------|------------------------|------------------------|-----------------------|---------|
| Amlexanox, Glycyrrhiza   | -15.42 (-69.31, 33.74) | -2.94 (-48.68, 41.88)  | -3.32 (-35.40, 27.19) | 0.67    |
| Amlexanox, Placebo       | -33.20 (-68.93, -0.68) | -14.02 (-57.49, 29.16) | -23.48 (-50.39, 2.53) | 0.41    |
| Amlexanox, Triamcinolone | 42.12 (2.87, 82.51)    | -6.95 (-57.71, 41.05)  | 22.39 (-11.79, 55.08) | 0.1     |
| Placebo, Triamcinolone   | 26.83 (-14.03, 66.31)  | 76.67 (29.75, 125.97)  | 45.80 (12.78, 79.09)  | 0.1     |

### 4. Network structure

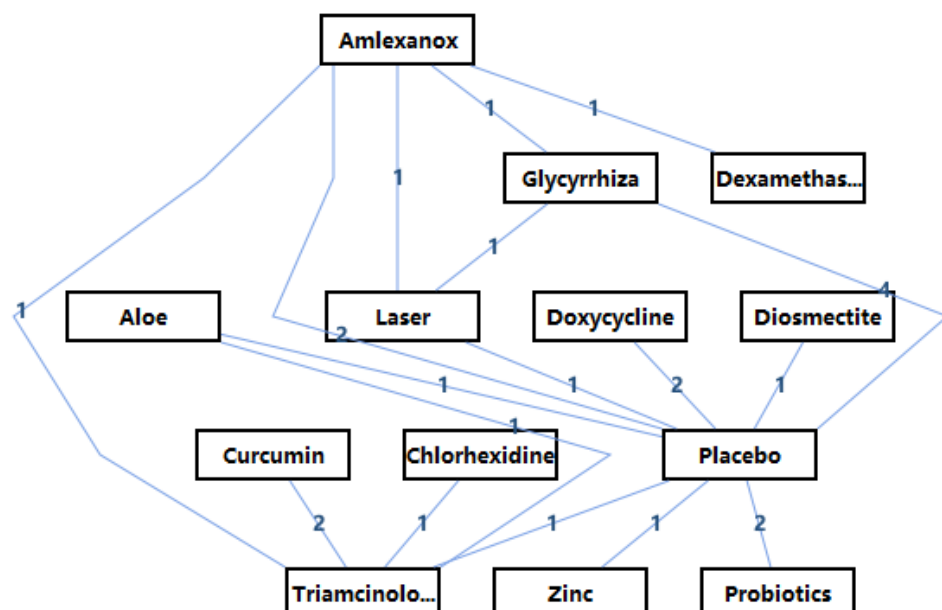

Day 6

1. Consistency Model

1.1 Summary estimates

|                          |                         |                         |                         |                         |                         |                         |                         |                         |                         |                         |
|--------------------------|-------------------------|-------------------------|-------------------------|-------------------------|-------------------------|-------------------------|-------------------------|-------------------------|-------------------------|-------------------------|
| Allison                  | -15.58 (-93.18, 61.40)  | 8.41 (-66.14, 81.71)    | -8.29 (-96.30, 80.70)   | -14.51 (-106.44, 77.58) | 4.75 (-91.21, 103.46)   | 10.21 (-86.53, 109.21)  | -10.46 (-100.81, 79.82) | -6.46 (-98.92, 81.03)   | -13.27 (-90.17, 65.60)  | 27.12 (-64.78, 115.94)  |
|                          | Alise                   | 24.03 (-34.90, 78.37)   | 7.28 (-69.27, 82.73)    | 1.60 (-79.51, 78.74)    | 20.66 (-61.48, 103.64)  | 25.66 (-53.05, 105.99)  | 4.74 (-72.51, 80.50)    | 8.84 (-69.61, 84.87)    | 2.61 (-60.65, 63.29)    | 42.21 (-36.21, 120.26)  |
| -8.41 (-81.71, 66.14)    | -24.03 (-78.37, 34.90)  | Amixanone               | -16.38 (-89.11, 56.13)  | -23.24 (-88.40, 54.31)  | -3.40 (-85.77, 81.70)   | 1.64 (-77.22, 85.69)    | -19.23 (-90.68, 54.33)  | -15.14 (-87.83, 56.75)  | -21.30 (-78.45, 37.75)  | 18.53 (-54.93, 91.28)   |
| 8.29 (-80.70, 96.30)     | -7.28 (-82.73, 69.27)   | 16.38 (-56.13, 89.11)   | Berberine Gellan        | -6.80 (-97.61, 86.22)   | 12.74 (-81.43, 111.82)  | 18.40 (-75.37, 113.49)  | -2.51 (-90.75, 87.60)   | 1.21 (-86.13, 90.11)    | -4.89 (-79.65, 73.32)   | 35.27 (-53.42, 124.28)  |
| 14.51 (-77.58, 106.44)   | -1.60 (-78.74, 79.51)   | 23.24 (-54.31, 98.40)   | 6.80 (-86.22, 97.61)    | Chitosan                | 19.40 (-77.48, 119.93)  | 25.30 (-73.34, 122.65)  | 3.83 (-87.99, 96.18)    | 8.07 (-86.29, 99.80)    | 2.13 (-77.93, 82.40)    | 40.79 (-49.35, 133.70)  |
| -4.75 (-103.46, 91.21)   | -20.66 (-103.64, 61.48) | 3.40 (-81.70, 85.77)    | -12.74 (-111.82, 81.43) | -19.40 (-119.93, 77.48) | Cholexydine             | 5.55 (-86.71, 94.49)    | -15.87 (-113.41, 80.81) | -10.96 (-109.31, 84.04) | -18.10 (-107.72, 68.36) | 22.00 (-80.99, 118.36)  |
| -10.21 (-109.21, 86.53)  | -25.66 (-105.99, 53.05) | -1.64 (-85.69, 77.22)   | -18.40 (-113.49, 75.37) | -25.30 (-122.65, 73.34) | -5.55 (-94.49, 86.71)   | Circumlin               | -21.46 (-119.23, 75.18) | -17.18 (-114.44, 78.34) | -22.70 (-109.22, 61.74) | 16.78 (-83.06, 112.80)  |
| 10.46 (-79.82, 100.81)   | -4.74 (-80.50, 72.51)   | 19.23 (-54.33, 90.68)   | 2.51 (-87.60, 90.75)    | -3.83 (-96.18, 87.99)   | 15.87 (-80.81, 113.41)  | 21.46 (-75.18, 119.23)  | Dexamethasone           | 4.31 (-87.54, 91.84)    | -1.93 (-78.82, 76.31)   | 37.66 (-52.21, 126.29)  |
| 6.46 (-81.03, 98.92)     | -8.84 (-84.87, 69.61)   | 15.14 (-56.75, 87.83)   | -1.21 (-90.11, 86.13)   | -8.07 (-99.80, 86.29)   | 10.96 (-84.04, 109.31)  | 17.18 (-78.34, 114.44)  | -4.31 (-91.84, 87.54)   | Diosmetin               | -6.40 (-84.60, 71.14)   | 33.90 (-55.81, 124.48)  |
| 13.27 (-65.60, 90.17)    | -2.61 (-63.29, 60.65)   | 21.30 (-37.75, 78.45)   | 4.89 (-73.32, 79.65)    | -2.13 (-82.40, 77.93)   | 18.10 (-68.36, 107.72)  | 22.70 (-61.74, 109.22)  | 1.93 (-76.31, 79.82)    | 6.40 (-71.14, 84.60)    | Doxycycline             | 39.81 (-40.48, 116.70)  |
| -27.12 (-115.94, 64.78)  | -42.21 (-120.26, 36.21) | -18.53 (-91.28, 54.93)  | -35.27 (-124.28, 53.42) | -40.79 (-133.70, 49.35) | -22.00 (-118.36, 80.99) | -16.78 (-112.80, 83.06) | -37.66 (-126.29, 52.21) | -33.90 (-124.48, 55.81) | -39.81 (-116.70, 40.48) | Heath's liposomal gel   |
| -35.60 (-132.39, 61.32)  | -51.62 (-134.64, 35.77) | -28.00 (-107.42, 54.12) | -44.06 (-139.04, 51.53) | -50.21 (-146.46, 47.82) | -31.12 (-131.89, 72.43) | -25.29 (-126.48, 77.54) | -46.33 (-143.35, 48.23) | -43.05 (-137.10, 54.32) | -48.46 (-133.45, 36.68) | -8.96 (-103.55, 87.15)  |
| -14.08 (-132.61, 104.84) | -30.00 (-134.03, 75.84) | -5.66 (-113.05, 100.00) | -22.22 (-141.78, 96.81) | -28.62 (-146.50, 91.85) | -8.61 (-73.78, 59.27)   | -3.66 (-114.73, 108.86) | -24.53 (-143.77, 99.83) | -20.45 (-139.96, 96.71) | -26.56 (-134.95, 83.91) | 12.97 (-107.16, 132.41) |
| 23.71 (-40.14, 87.24)    | 8.17 (-34.62, 52.18)    | 32.31 (-5.64, 67.60)    | 15.60 (-47.75, 78.00)   | 9.14 (-57.49, 74.02)    | 28.75 (-44.93, 104.56)  | 33.85 (-37.82, 107.48)  | 12.92 (-50.08, 75.18)   | 17.41 (-46.89, 81.44)   | 11.34 (-33.04, 55.41)   | 50.76 (-13.42, 114.19)  |
| -0.87 (-76.85, 72.28)    | -16.41 (-65.70, 32.38)  | 7.55 (-46.15, 56.10)    | -9.07 (-83.63, 60.35)   | -15.20 (-92.40, 59.29)  | 4.32 (-61.10, 70.10)    | 9.29 (-55.34, 72.46)    | -11.95 (-86.16, 61.60)  | -7.40 (-81.85, 64.47)   | -13.87 (-73.35, 42.34)  | 25.94 (-49.24, 98.32)   |
| 1.72 (-89.56, 96.47)     | -14.31 (-82.89, 54.41)  | 9.83 (-58.52, 78.28)    | -6.73 (-94.71, 75.92)   | -13.08 (-101.58, 73.17) | 6.09 (-80.50, 91.48)    | 11.71 (-74.17, 97.63)   | -8.94 (-95.91, 75.52)   | -5.51 (-91.16, 79.79)   | -11.48 (-85.88, 61.88)  | 28.02 (-59.38, 112.80)  |
| -15.54 (-107.60, 74.92)  | -31.28 (-108.12, 48.65) | -7.07 (-82.47, 68.66)   | -24.22 (-111.61, 65.79) | -30.42 (-123.04, 63.84) | -10.76 (-106.82, 92.51) | -5.67 (-103.32, 95.25)  | -26.39 (-118.61, 65.73) | -21.79 (-116.15, 67.91) | -28.87 (-107.49, 50.82) | 11.23 (-79.45, 101.12)  |

|                         |                          |                         |                         |                         |                         |
|-------------------------|--------------------------|-------------------------|-------------------------|-------------------------|-------------------------|
| 35.60 (-61.32, 132.39)  | 14.08 (-104.84, 132.61)  | -23.71 (-87.24, 40.14)  | 0.87 (-72.28, 76.85)    | -1.72 (-86.47, 88.56)   | 15.54 (-74.92, 107.60)  |
| 51.62 (-35.77, 134.64)  | 30.00 (-75.84, 134.03)   | -8.17 (-52.18, 34.62)   | 16.41 (-32.38, 65.70)   | 14.31 (-54.41, 82.89)   | 31.28 (-48.65, 108.12)  |
| 28.00 (-54.12, 107.42)  | 5.66 (-100.00, 113.05)   | -32.31 (-67.60, 5.64)   | -7.55 (-58.10, 46.15)   | -9.83 (-78.28, 58.52)   | 7.07 (-68.66, 82.47)    |
| 44.06 (-51.53, 139.04)  | 22.22 (-96.81, 141.78)   | -15.60 (-78.00, 47.75)  | 9.07 (-60.35, 88.63)    | 6.73 (-75.92, 94.71)    | 24.22 (-65.79, 111.61)  |
| 50.21 (-47.82, 146.46)  | 28.62 (-91.85, 146.50)   | -9.14 (-74.02, 57.49)   | 15.20 (-59.29, 92.40)   | 13.08 (-73.17, 101.58)  | 30.42 (-63.84, 123.04)  |
| 31.12 (-72.43, 131.69)  | 8.61 (-59.27, 73.78)     | -28.75 (-104.56, 44.93) | -4.32 (-70.10, 61.10)   | -6.09 (-91.48, 80.50)   | 10.76 (-92.51, 106.82)  |
| 25.29 (-77.54, 126.48)  | 3.65 (-108.86, 114.73)   | -33.85 (-107.48, 37.62) | -9.29 (-72.46, 55.34)   | -11.71 (-97.63, 74.17)  | 5.67 (-95.25, 103.32)   |
| 46.33 (-48.23, 143.35)  | 24.53 (-93.83, 143.77)   | -12.92 (-75.18, 50.08)  | 11.95 (-61.60, 86.16)   | 8.94 (-75.52, 95.91)    | 26.39 (-65.73, 118.61)  |
| 43.05 (-54.32, 137.10)  | 20.45 (-96.71, 139.96)   | -17.41 (-81.44, 46.89)  | 7.40 (-64.47, 81.85)    | 5.51 (-79.79, 91.16)    | 21.79 (-67.91, 116.15)  |
| 48.46 (-36.68, 133.45)  | 26.56 (-83.91, 134.95)   | -11.34 (-55.41, 33.04)  | 13.87 (-42.34, 73.35)   | 11.48 (-61.08, 85.88)   | 28.87 (-50.82, 107.49)  |
| 8.96 (-87.15, 103.55)   | -12.97 (-132.41, 107.16) | -50.76 (-114.19, 13.42) | -25.94 (-98.32, 49.24)  | -28.02 (-112.80, 59.38) | -11.23 (-101.12, 79.45) |
| Laser                   | -21.94 (-146.26, 102.10) | -59.65 (-130.10, 12.85) | -35.02 (-113.22, 48.18) | -36.93 (-127.00, 55.47) | -21.08 (-115.42, 72.78) |
| 21.94 (-102.10, 146.26) | N-acetylcysteine         | -38.07 (-138.00, 62.75) | -12.81 (-105.96, 80.60) | -15.72 (-123.50, 95.09) | 2.18 (-118.18, 119.62)  |
| 59.65 (-12.85, 130.10)  | Placebo                  | 24.71 (-11.06, 61.67)   | 22.40 (-34.44, 80.55)   | -2.35 (-58.83, 55.39)   | 39.68 (-26.60, 104.99)  |
| 35.02 (-48.18, 113.22)  | 12.81 (-80.60, 105.96)   | -24.71 (-61.67, 11.06)  | Triamcinolone           | -2.35 (-58.83, 55.39)   | 14.76 (-62.20, 87.93)   |
| 36.93 (-55.47, 127.00)  | 15.72 (-95.09, 123.50)   | -22.40 (-80.55, 34.44)  | 2.35 (-55.39, 58.83)    | Triester Glycerol Oxide | 17.27 (-72.68, 101.91)  |
| 21.08 (-72.78, 115.42)  | -2.18 (-119.62, 118.18)  | -39.68 (-104.99, 26.60) | -14.76 (-67.93, 62.20)  | -17.27 (-101.91, 72.68) | Zinc                    |

## 1.2 Rank probability(Rank 1 is best, rank N is worst)

| Drug                    | Rank 1 | Rank 2 | Rank 3 | Rank 4 | Rank 5 | Rank 6 | Rank 7 | Rank 8 | Rank 9 | Rank 10 | Rank 11 | Rank 12 | Rank 13 | Rank 14 | Rank 15 | Rank 16 | Rank 17 |
|-------------------------|--------|--------|--------|--------|--------|--------|--------|--------|--------|---------|---------|---------|---------|---------|---------|---------|---------|
| Allicin                 | 0.03   | 0.05   | 0.06   | 0.06   | 0.07   | 0.07   | 0.06   | 0.07   | 0.07   | 0.06    | 0.06    | 0.06    | 0.06    | 0.05    | 0.05    | 0.06    | 0.06    |
| Aloe                    | 0      | 0.01   | 0.01   | 0.02   | 0.02   | 0.03   | 0.04   | 0.05   | 0.06   | 0.08    | 0.09    | 0.1     | 0.1     | 0.1     | 0.1     | 0.1     | 0.08    |
| Amlexanox               | 0.01   | 0.04   | 0.07   | 0.1    | 0.12   | 0.11   | 0.11   | 0.1    | 0.08   | 0.08    | 0.06    | 0.05    | 0.03    | 0.02    | 0.01    | 0.01    | 0       |
| Berberine gelatin       | 0.02   | 0.03   | 0.04   | 0.05   | 0.05   | 0.06   | 0.06   | 0.06   | 0.06   | 0.07    | 0.07    | 0.07    | 0.07    | 0.07    | 0.07    | 0.08    | 0.1     |
| Chitosan                | 0.02   | 0.03   | 0.03   | 0.04   | 0.04   | 0.04   | 0.04   | 0.05   | 0.05   | 0.05    | 0.06    | 0.06    | 0.06    | 0.07    | 0.07    | 0.1     | 0.17    |
| Chlorhexidine           | 0.03   | 0.08   | 0.09   | 0.08   | 0.07   | 0.07   | 0.06   | 0.06   | 0.06   | 0.06    | 0.05    | 0.05    | 0.05    | 0.04    | 0.05    | 0.06    | 0.04    |
| Curcumin                | 0.09   | 0.09   | 0.09   | 0.08   | 0.08   | 0.07   | 0.06   | 0.06   | 0.05   | 0.05    | 0.05    | 0.04    | 0.04    | 0.03    | 0.04    | 0.03    | 0.04    |
| Dexamethasone           | 0.02   | 0.03   | 0.04   | 0.05   | 0.04   | 0.05   | 0.05   | 0.05   | 0.06   | 0.06    | 0.06    | 0.07    | 0.07    | 0.07    | 0.08    | 0.09    | 0.12    |
| Diosmectite             | 0.02   | 0.03   | 0.04   | 0.05   | 0.05   | 0.06   | 0.05   | 0.06   | 0.06   | 0.06    | 0.06    | 0.07    | 0.07    | 0.06    | 0.06    | 0.08    | 0.09    |
| Doxycycline             | 0      | 0.01   | 0.01   | 0.02   | 0.03   | 0.04   | 0.05   | 0.06   | 0.06   | 0.08    | 0.09    | 0.09    | 0.1     | 0.09    | 0.09    | 0.08    | 0.07    |
| Insulin-liposomal gel   | 0.17   | 0.18   | 0.13   | 0.1    | 0.08   | 0.06   | 0.05   | 0.04   | 0.03   | 0.03    | 0.03    | 0.02    | 0.02    | 0.02    | 0.01    | 0.01    | 0.01    |
| Laser                   | 0.32   | 0.15   | 0.11   | 0.07   | 0.06   | 0.05   | 0.04   | 0.04   | 0.03   | 0.02    | 0.02    | 0.02    | 0.02    | 0.02    | 0.01    | 0.01    | 0.01    |
| N-acetylcysteine        | 0.16   | 0.11   | 0.09   | 0.07   | 0.06   | 0.05   | 0.05   | 0.04   | 0.04   | 0.04    | 0.04    | 0.03    | 0.03    | 0.03    | 0.04    | 0.05    | 0.08    |
| Placebo                 | 0      | 0      | 0      | 0      | 0      | 0      | 0      | 0.01   | 0.01   | 0.03    | 0.06    | 0.1     | 0.15    | 0.21    | 0.22    | 0.16    | 0.05    |
| Triamcinolone           | 0      | 0.01   | 0.02   | 0.04   | 0.07   | 0.1    | 0.12   | 0.13   | 0.13   | 0.12    | 0.1     | 0.07    | 0.05    | 0.03    | 0.02    | 0.01    | 0       |
| Triester Glycerol Oxide | 0.02   | 0.04   | 0.05   | 0.06   | 0.07   | 0.07   | 0.08   | 0.07   | 0.07   | 0.07    | 0.07    | 0.07    | 0.06    | 0.06    | 0.05    | 0.05    | 0.04    |
| Zinc                    | 0.09   | 0.12   | 0.12   | 0.1    | 0.08   | 0.07   | 0.06   | 0.06   | 0.05   | 0.04    | 0.04    | 0.03    | 0.04    | 0.03    | 0.03    | 0.03    | 0.02    |

### 1.3 Consistency check

| Parameter                         | Median (95% CI)      |
|-----------------------------------|----------------------|
| Random Effects Standard Deviation | 26.71 (14.77, 55.74) |

## 1.4 Convergence Diagnostics

| Parameter                           | PSRF |
|-------------------------------------|------|
| d.Chlorhexidine.Nacetylcysteine     | 1.00 |
| d.Placebo.Allicin                   | 1.00 |
| d.Placebo.Amlexanox                 | 1.00 |
| d.Placebo.Berberinegelatin          | 1.00 |
| d.Placebo.Chitosan                  | 1.00 |
| d.Placebo.Dexamethasone             | 1.00 |
| d.Placebo.Diosmectite               | 1.00 |
| d.Placebo.Doxycycline               | 1.00 |
| d.Placebo.Insulinliposomalgel       | 1.03 |
| d.Placebo.Laser                     | 1.34 |
| d.Placebo.Zinc                      | 1.09 |
| d.Triamcinolone.Aloe                | 1.00 |
| d.Triamcinolone.Chlorhexidine       | 1.00 |
| d.Triamcinolone.Curcumin            | 1.03 |
| d.Triamcinolone.Placebo             | 1.00 |
| d.Triamcinolone.TriesterGlycerol... | 1.00 |
| sd.d                                | 1.00 |

Number of chains : 4

Tuning iterations : 20,000

Simulation iterations : 50,000

Thinning interval : 10

Inference samples : 10,000

Variance scaling factor: 2.5

## 2.Inconsistency Model

## 2.1 Summary estimates

|                          |                         |                         |                          |                          |                         |                          |                         |
|--------------------------|-------------------------|-------------------------|--------------------------|--------------------------|-------------------------|--------------------------|-------------------------|
| Allison                  | 14.08 (-67.04, 95.32)   | Alice                   | 23.47 (-37.86, 80.91)    | 6.21 (-74.61, 87.21)     | -0.01 (-81.43, 83.30)   | 18.99 (-68.93, 109.86)   | 18.02 (-70.72, 104.76)  |
|                          | -8.69 (-83.56, 68.34)   | -23.47 (-80.91, 37.86)  | Antennox                 | 16.88 (-64.40, 99.25)    | Bethanne Opium          | -23.08 (-99.07, 55.12)   | -3.22 (-96.55, 90.17)   |
|                          | 7.54 (-85.71, 103.78)   | -6.21 (-87.21, 74.61)   |                          | 6.66 (-91.42, 103.75)    | Chesnan                 | -6.66 (-133.75, 91.42)   | 13.07 (-94.55, 124.66)  |
|                          | 14.29 (-76.80, 107.91)  | 0.01 (-83.30, 81.41)    | 23.08 (-55.12, 99.07)    |                          |                         | 19.50 (-96.09, 128.51)   | 17.20 (-92.31, 123.71)  |
|                          | -4.96 (-112.38, 101.91) | -18.99 (-109.86, 68.93) | 3.22 (-90.17, 96.55)     | -13.07 (-124.66, 94.65)  | -19.50 (-128.51, 86.09) | Cherendine               | -2.42 (-97.53, 93.75)   |
|                          | -2.87 (-108.30, 99.44)  | -18.02 (-104.76, 70.72) | 5.48 (-86.51, 95.56)     | -10.82 (-117.50, 96.06)  | -17.20 (-123.71, 92.31) |                          | Curcumin                |
|                          | 11.22 (-82.66, 105.09)  | -3.75 (-81.34, 79.15)   | 19.00 (-55.56, 97.55)    | 3.20 (-87.85, 95.53)     | -3.32 (-97.43, 92.10)   | 15.49 (-88.72, 126.38)   | 14.50 (-92.08, 121.24)  |
|                          | 6.45 (-85.19, 100.02)   | -7.22 (-89.25, 74.27)   | 15.61 (-60.47, 90.16)    | -1.52 (-93.98, 92.41)    | -8.16 (-101.35, 89.24)  | 11.40 (-95.64, 120.35)   | 10.09 (-96.08, 115.71)  |
|                          | 12.83 (-68.71, 95.83)   | -1.77 (-67.00, 66.52)   | 21.26 (-40.45, 83.25)    | 4.33 (-75.25, 86.51)     | -1.39 (-84.46, 82.82)   | 17.67 (-79.02, 116.32)   | 16.05 (-79.57, 116.06)  |
|                          | -25.86 (-117.48, 69.58) | -39.59 (-119.66, 42.47) | -17.10 (-92.71, 62.09)   | -33.77 (-123.69, 63.61)  | -39.79 (-136.03, 56.08) | -20.63 (-125.50, 88.72)  | -22.26 (-126.80, 85.81) |
| -28.13 (-122.94, 67.79)  | -42.77 (-124.77, 43.57) | -19.77 (-96.31, 59.43)  | -36.73 (-130.11, 61.32)  | -42.71 (-138.23, 55.65)  | -23.50 (-130.94, 87.75) | -24.91 (-130.06, 83.63)  |                         |
| -13.98 (-142.04, 112.43) | -28.80 (-139.63, 84.96) | -6.13 (-119.00, 111.24) | -22.88 (-149.38, 106.65) | -28.94 (-156.27, 103.68) | -9.57 (-78.01, 58.26)   | -11.94 (-131.88, 111.76) |                         |
| 23.59 (-41.52, 88.34)    | 9.39 (-36.64, 56.49)    | 32.39 (-5.70, 70.03)    | 15.82 (-50.88, 81.70)    | 9.30 (-59.04, 78.27)     | 28.74 (-56.58, 115.21)  | 26.96 (-57.76, 111.75)   |                         |
| -1.45 (-84.65, 79.32)    | -15.89 (-73.04, 41.06)  | 7.20 (-55.62, 67.98)    | -9.17 (-93.38, 71.45)    | -16.02 (-99.76, 68.50)   | 3.28 (-64.23, 72.01)    | 1.39 (-64.84, 66.58)     |                         |
| 0.50 (-96.59, 100.30)    | -13.52 (-88.83, 68.01)  | 9.00 (-71.46, 33.91)    | -7.18 (-105.74, 91.09)   | -14.15 (-112.35, 91.12)  | 5.52 (-84.75, 98.34)    | 3.34 (-65.76, 96.31)     |                         |
| -7.58 (-100.25, 85.88)   | -21.89 (-99.98, 59.46)  | 1.20 (-74.05, 79.02)    | -14.60 (-111.62, 76.55)  | -21.64 (-117.49, 75.82)  | -2.37 (-111.47, 106.56) | -4.30 (-108.49, 102.70)  |                         |



|                          |                          |                         |                         |                         |                          |                         |                         |                            |                         |
|--------------------------|--------------------------|-------------------------|-------------------------|-------------------------|--------------------------|-------------------------|-------------------------|----------------------------|-------------------------|
| -11.22 (-105.09, 82.66)  | -6.45 (-100.02, 85.19)   | -12.63 (-95.93, 69.71)  | 25.86 (-69.58, 117.48)  | 28.13 (-67.79, 122.94)  | 13.98 (-112.43, 142.04)  | -23.56 (-88.34, 41.52)  | 1.45 (-79.32, 84.65)    | -0.50 (-100.90, 96.59)     | 7.58 (-85.88, 100.25)   |
| 3.75 (-79.15, 81.34)     | 7.22 (-74.27, 89.25)     | 1.77 (-66.52, 67.00)    | 39.59 (-42.47, 119.66)  | 42.77 (-43.57, 124.77)  | 28.80 (-84.96, 139.63)   | -9.39 (-56.49, 36.64)   | 15.89 (-41.06, 73.04)   | 13.52 (-68.01, 89.83)      | 21.89 (-59.46, 94.98)   |
| -19.00 (-97.55, 55.56)   | -15.61 (-90.16, 60.47)   | -21.26 (-83.25, 40.45)  | 17.10 (-62.09, 92.71)   | 19.77 (-59.43, 96.31)   | 6.13 (-111.24, 119.00)   | -32.39 (-70.03, 5.70)   | -7.20 (-67.98, 55.62)   | -9.00 (-93.91, 71.46)      | -12.14 (-79.02, 44.73)  |
| -3.20 (-95.53, 87.85)    | 1.52 (-92.41, 93.98)     | -4.33 (-86.51, 75.25)   | 33.77 (-63.61, 123.69)  | 36.73 (-61.32, 130.11)  | 22.88 (-106.85, 149.38)  | -15.82 (-81.70, 50.68)  | 9.17 (-71.45, 93.38)    | 7.18 (-91.09, 105.74)      | 14.64 (-55.15, 117.82)  |
| 3.32 (-92.10, 97.43)     | 8.16 (-89.24, 101.35)    | 1.39 (-82.92, 84.46)    | 39.79 (-56.08, 136.03)  | 42.71 (-55.65, 138.23)  | 28.94 (-103.68, 156.27)  | -9.30 (-78.27, 59.04)   | 16.02 (-68.50, 99.76)   | 14.15 (-91.12, 112.35)     | 21.64 (-87.58, 149.49)  |
| -15.49 (-126.38, 88.72)  | -11.40 (-120.35, 95.64)  | -17.67 (-116.32, 79.02) | 20.63 (-88.72, 125.50)  | 23.50 (-87.75, 130.94)  | 9.57 (-58.26, 78.01)     | -28.74 (-115.21, 56.58) | -3.28 (-72.01, 64.23)   | -5.52 (-98.34, 84.75)      | 2.37 (-14.55, 114.47)   |
| -14.50 (-121.24, 92.08)  | -10.09 (-115.71, 96.08)  | -16.05 (-116.06, 79.37) | 22.26 (-85.81, 126.80)  | 24.91 (-83.63, 130.06)  | 11.94 (-117.76, 131.88)  | -26.96 (-111.75, 57.76) | -1.39 (-66.58, 64.84)   | -3.34 (-96.31, 85.78)      | 4.30 (-45.77, 105.48)   |
| Dexamethasone            | 4.42 (-88.79, 98.54)     | -1.59 (-83.62, 80.04)   | 35.87 (-58.22, 129.90)  | 39.48 (-57.54, 134.78)  | 25.67 (-101.89, 154.11)  | -12.94 (-78.31, 54.69)  | 12.55 (-67.61, 95.57)   | 10.18 (-89.79, 108.52)     | 18.34 (-76.68, 111.40)  |
| -4.42 (-98.54, 88.79)    | Doenectate               | -6.38 (-86.45, 73.82)   | 32.13 (-61.34, 124.16)  | 35.22 (-58.85, 127.94)  | 21.20 (-107.55, 151.85)  | -16.84 (-83.71, 49.34)  | 8.52 (-72.55, 91.40)    | 5.95 (-93.56, 103.76)      | 14.27 (-81.64, 106.77)  |
| 1.59 (-80.04, 83.62)     | 6.38 (-73.82, 86.45)     | Doxycycline             | 38.57 (-43.96, 118.96)  | 40.71 (-41.87, 124.88)  | 27.63 (-95.51, 145.26)   | -10.85 (-57.93, 37.99)  | 14.19 (-54.04, 83.71)   | 12.19 (-76.43, 98.78)      | 20.44 (-60.22, 140.90)  |
| -35.87 (-129.90, 58.22)  | -32.13 (-124.16, 61.34)  | -38.57 (-118.96, 43.96) | Insulin-hexosamol gel   | 2.71 (-91.47, 95.97)    | -11.88 (-141.55, 117.83) | -49.20 (-114.29, 19.44) | -23.92 (-105.62, 61.19) | -26.40 (-124.73, 73.36)    | 34.86 (-11.32, 67.82)   |
| -39.48 (-134.78, 57.54)  | -35.22 (-127.94, 58.85)  | -40.71 (-124.88, 41.87) | -2.71 (-95.97, 91.47)   | Doenectate              | -13.51 (-143.80, 115.83) | -52.02 (-117.86, 17.43) | -26.63 (-109.11, 58.73) | -28.94 (-127.95, 72.96)    | 20.17 (-112.66, 51.60)  |
| -25.67 (-154.11, 101.89) | -21.20 (-151.85, 107.55) | -27.63 (-145.26, 95.51) | 11.88 (-117.83, 141.55) | 13.51 (-115.83, 148.80) | N-acetylcysteine         | -38.46 (-145.73, 71.89) | -12.89 (-109.08, 85.78) | -15.65 (-130.59, 101.52)   | 27.17 (-134.71, 229.19) |
| 12.94 (-54.69, 78.31)    | 16.84 (-49.34, 83.71)    | 10.86 (-37.99, 57.93)   | 49.20 (-19.44, 114.29)  | 52.02 (-17.43, 117.86)  | 38.46 (-71.88, 145.73)   | Placebo                 | 24.18 (-38.05, 86.74)   | 21.75 (-57.98, 101.60)     | 25.54 (-35.42, 135.32)  |
| -12.55 (-95.57, 67.61)   | -8.52 (-91.40, 72.55)    | -14.19 (-83.71, 54.04)  | 23.92 (-61.19, 105.62)  | 26.63 (-58.73, 109.11)  | 12.89 (-85.78, 109.08)   | -24.18 (-86.74, 38.05)  | Transdermal             | -1.68 (-66.71, 57.89)      | 54.74 (-75.89, 185.37)  |
| -10.18 (-108.52, 89.79)  | -5.95 (-103.76, 93.56)   | -12.19 (-98.78, 76.43)  | 26.40 (-73.36, 124.73)  | 28.94 (-72.96, 127.95)  | 15.65 (-101.52, 130.59)  | -21.75 (-101.60, 57.98) | 1.68 (-57.89, 66.71)    | Therapeutic Glyceral Oxide | 57.14 (-90.99, 106.48)  |
| -18.39 (-111.54, 75.08)  | -14.27 (-106.77, 81.64)  | -20.42 (-102.60, 60.22) | 18.38 (-76.78, 111.32)  | 21.17 (-75.16, 112.61)  | 7.72 (-122.39, 134.12)   | -31.52 (-97.32, 35.42)  | -5.64 (-85.22, 75.69)   | -8.37 (-106.09, 90.99)     | 22.14 (-94.54, 148.82)  |

2.2 Inconsistency Factors

|                              |                       |  |
|------------------------------|-----------------------|--|
| Cyclo                        | Median (95% CI)       |  |
| Aloe, Placebo, Triamcinolone | -0.38 (-58.99, 54.34) |  |
| Aloe, Placebo, Triamcinolone | -0.38 (-58.99, 54.34) |  |

2.3 Variance Calculation

|                                   |                      |
|-----------------------------------|----------------------|
| Parameter                         | Median (95% CI)      |
| Random Effects Standard Deviation | 28.06 (15.11, 58.19) |
| Inconsistency Standard Deviation  | 24.41 (1.30, 64.80)  |

## 2.4 Convergence Diagnostics

| Parameter                           | PSRF |  |
|-------------------------------------|------|--|
| d.Allicin.Placebo                   | 1.00 |  |
| d.Aloe.Triamcinolone                | 1.00 |  |
| d.Chlorhexidine.Nacetylcysteine     | 1.00 |  |
| d.Placebo.Aloe                      | 1.00 |  |
| d.Placebo.Amlexanox                 | 1.00 |  |
| d.Placebo.Berberinegelatin          | 1.00 |  |
| d.Placebo.Chitosan                  | 1.00 |  |
| d.Placebo.Dexamethasone             | 1.00 |  |
| d.Placebo.Diosmectite               | 1.00 |  |
| d.Placebo.Doxycycline               | 1.00 |  |
| d.Placebo.Insulinliposomalgel       | 1.00 |  |
| d.Placebo.Laser                     | 1.00 |  |
| d.Placebo.Zinc                      | 1.01 |  |
| d.Triamcinolone.Chlorhexidine       | 1.00 |  |
| d.Triamcinolone.Curcumin            | 1.00 |  |
| d.Triamcinolone.TriesterGlycerol... | 1.00 |  |
| w.Aloe.Placebo.Triamcinolone        | 1.00 |  |
| w.Aloe.Placebo.Triamcinolone        | 1.00 |  |
| sd.d                                | 1.00 |  |
| sd.w                                | 1.00 |  |

Number of chains : 4

Tuning iterations : 20,000

Simulation iterations : 50,000

Thinning interval : 10

Inference samples : 10,000

Variance scaling factor: 2.5

## 3. Node-splitting analysis

| Name                | Direct Effect         | Indirect Effect       | Overall               | P-Value |
|---------------------|-----------------------|-----------------------|-----------------------|---------|
| Aloe, Triamcinolone | 18.64 (-51.20, 89.82) | 15.88 (-56.56, 89.69) | 16.41 (-32.38, 65.70) | 0.94    |

## 4. Network structure

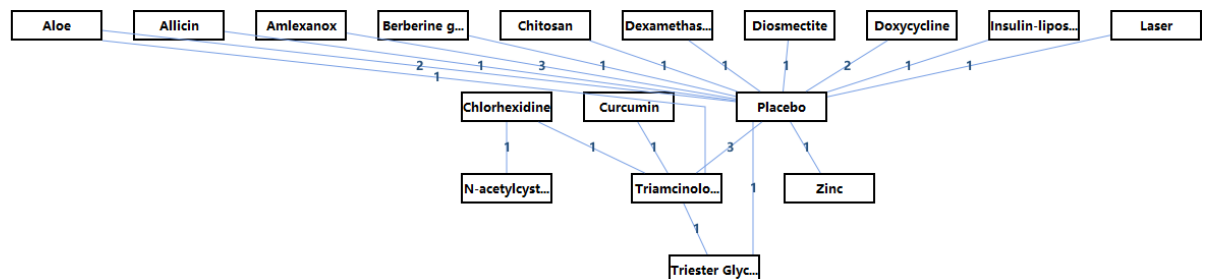

Day 7

1. Consistency Model

|                        |                        |                        |                        |                        |                        |                        |                        |                        |                        |                        |                       |
|------------------------|------------------------|------------------------|------------------------|------------------------|------------------------|------------------------|------------------------|------------------------|------------------------|------------------------|-----------------------|
| Aloe                   | 8.28 (-29.91, 47.09)   | 3.27 (-34.44, 41.10)   | 11.63 (-14.23, 39.64)  | 8.42 (-22.49, 41.28)   | 4.91 (-22.35, 31.30)   | 10.31 (-13.72, 32.75)  | -4.44 (-24.12, 17.39)  | 21.94 (-7.04, 53.69)   | 9.44 (-35.79, 52.40)   | 8.16 (-13.71, 28.52)   | 5.53 (-27.75, 40.21)  |
| -8.28 (-47.09, 29.91)  | Anthracox              | -5.77 (-53.42, 42.30)  | 3.40 (-36.37, 44.23)   | -0.05 (-20.69, 22.41)  | -3.30 (-40.40, 31.63)  | 1.89 (-35.24, 36.01)   | -12.73 (-43.87, 19.53) | 13.56 (-23.55, 53.30)  | 0.59 (-53.02, 53.15)   | -0.07 (-37.96, 35.16)  | -3.00 (-43.99, 39.13) |
| -3.27 (-41.10, 34.44)  | Chlorcedine            | 8.66 (-26.42, 45.14)   | 5.64 (-36.60, 50.04)   | 1.90 (-37.99, 40.35)   | 6.88 (-27.84, 40.74)   | -7.29 (-42.37, 28.76)  | 18.81 (-21.20, 62.36)  | 6.14 (-15.99, 28.40)   | 4.88 (-27.16, 35.94)   | 2.78 (-41.64, 48.22)   |                       |
| -11.63 (-39.64, 14.23) | Cineurin               | -3.42 (-30.93, 37.76)  | -3.42 (-37.76, 30.93)  | -6.80 (-36.04, 20.42)  | -1.43 (-25.33, 19.24)  | -16.05 (-39.17, 7.77)  | 10.17 (-21.23, 44.08)  | -2.59 (-45.24, 39.06)  | -3.51 (-21.80, 11.68)  | -6.29 (-40.77, 29.25)  |                       |
| -8.42 (-41.28, 22.49)  | Desmethasone           | 3.42 (-30.93, 37.76)   | -3.49 (-34.40, 23.95)  | 1.76 (-28.88, 28.24)   | -12.74 (-36.19, 11.15) | 13.31 (-19.18, 47.12)  | 0.42 (-49.75, 49.38)   | -0.26 (-31.61, 27.63)  | -3.05 (-37.44, 33.26)  |                        |                       |
| -4.91 (-31.30, 22.35)  | Doxycline              | 6.80 (-20.42, 36.04)   | 3.49 (-23.95, 34.40)   | 5.33 (-18.04, 27.48)   | -9.23 (-24.43, 9.32)   | 16.97 (-9.50, 47.52)   | 4.33 (-41.47, 50.55)   | 3.30 (-20.56, 26.16)   | 0.84 (-28.70, 34.47)   |                        |                       |
| -10.31 (-32.75, 13.72) | 1.43 (-19.24, 25.33)   | -1.76 (-28.24, 28.88)  | -5.33 (-27.48, 18.04)  | Laser                  | -14.63 (-28.41, 3.42)  | 11.53 (-13.52, 42.18)  | -0.99 (-41.39, 40.23)  | -2.08 (-15.95, 12.27)  | -4.22 (-33.75, 28.28)  |                        |                       |
| 4.44 (-17.39, 24.12)   | 12.73 (-19.53, 43.87)  | 7.29 (-28.76, 42.37)   | 16.05 (-7.77, 39.17)   | 12.74 (-11.15, 36.19)  | 9.23 (-9.32, 24.43)    | 14.63 (-3.42, 28.41)   | Fluorbo                | 26.25 (4.00, 49.84)    | 13.50 (-30.51, 54.46)  | 12.56 (-6.58, 27.34)   | 9.74 (-16.41, 37.01)  |
| -21.94 (-53.69, 7.04)  | -13.56 (-53.30, 23.55) | -18.81 (-62.36, 21.20) | -10.17 (-44.08, 21.23) | -13.31 (-47.12, 19.18) | -16.97 (-47.52, 9.50)  | -11.53 (-42.18, 13.52) | Silver nitrate         | -12.79 (-63.70, 33.39) | -13.61 (-44.71, 12.11) | -16.50 (-52.07, 18.61) |                       |
| -9.44 (-52.40, 35.79)  | -0.59 (-53.15, 53.02)  | -6.14 (-28.40, 15.99)  | 2.59 (-39.06, 45.24)   | -0.42 (-49.38, 49.75)  | -4.33 (-50.55, 41.47)  | 0.99 (-40.23, 41.39)   | Sucralife              | -1.06 (-39.83, 37.01)  | -3.52 (-53.57, 47.73)  |                        |                       |
| -8.16 (-28.52, 13.71)  | 0.07 (-35.16, 37.96)   | -4.88 (-35.94, 27.16)  | 3.51 (-11.68, 21.80)   | 0.26 (-27.63, 31.61)   | -3.30 (-26.16, 20.56)  | 2.08 (-12.27, 15.95)   | -12.56 (-27.34, 6.58)  | 13.61 (-12.11, 44.71)  | 1.06 (-37.01, 39.83)   | Tramundione            | -2.79 (-31.72, 30.24) |
| -5.53 (-40.21, 27.75)  | 3.00 (-39.13, 43.99)   | -2.78 (-48.22, 41.64)  | 6.29 (-29.25, 40.77)   | 3.05 (-33.26, 37.44)   | -0.84 (-34.47, 28.70)  | 4.22 (-28.28, 33.75)   | -9.74 (-37.01, 16.41)  | 16.50 (-18.61, 52.07)  | 3.52 (-47.73, 53.57)   | 2.79 (-30.24, 31.72)   | Zinc                  |

## 1.2 Rank probability(Rank 1 is best, rank N is worst)

| Drug           | Rank 1 | Rank 2 | Rank 3 | Rank 4 | Rank 5 | Rank 6 | Rank 7 | Rank 8 | Rank 9 | Rank 10 | Rank 11 | Rank 12 |
|----------------|--------|--------|--------|--------|--------|--------|--------|--------|--------|---------|---------|---------|
| Aloe           | 0.01   | 0.01   | 0.02   | 0.03   | 0.04   | 0.06   | 0.08   | 0.12   | 0.15   | 0.18    | 0.16    | 0.14    |
| Amlexanox      | 0.09   | 0.11   | 0.1    | 0.08   | 0.08   | 0.07   | 0.08   | 0.08   | 0.08   | 0.08    | 0.06    | 0.08    |
| Chlorhexidine  | 0.02   | 0.09   | 0.08   | 0.06   | 0.06   | 0.07   | 0.07   | 0.07   | 0.08   | 0.09    | 0.13    | 0.19    |
| Curcumin       | 0.08   | 0.14   | 0.14   | 0.14   | 0.12   | 0.11   | 0.09   | 0.07   | 0.05   | 0.04    | 0.02    | 0.01    |
| Dexamethasone  | 0.03   | 0.1    | 0.12   | 0.11   | 0.1    | 0.09   | 0.1    | 0.1    | 0.09   | 0.07    | 0.05    | 0.03    |
| Doxycycline    | 0.01   | 0.04   | 0.06   | 0.08   | 0.09   | 0.1    | 0.12   | 0.14   | 0.12   | 0.11    | 0.07    | 0.04    |
| Laser          | 0.02   | 0.09   | 0.12   | 0.17   | 0.15   | 0.14   | 0.12   | 0.09   | 0.05   | 0.03    | 0.02    | 0.01    |
| Placebo        | 0      | 0      | 0      | 0      | 0.01   | 0.02   | 0.04   | 0.07   | 0.13   | 0.2     | 0.26    | 0.28    |
| Silver nitrate | 0.48   | 0.18   | 0.13   | 0.07   | 0.05   | 0.03   | 0.02   | 0.02   | 0.01   | 0.01    | 0.01    | 0       |
| Sucralfate     | 0.18   | 0.12   | 0.08   | 0.07   | 0.06   | 0.06   | 0.06   | 0.06   | 0.06   | 0.07    | 0.11    | 0.09    |
| Triamcinolone  | 0      | 0.02   | 0.07   | 0.12   | 0.18   | 0.19   | 0.16   | 0.12   | 0.08   | 0.04    | 0.02    | 0       |
| Zinc           | 0.07   | 0.1    | 0.08   | 0.07   | 0.07   | 0.06   | 0.07   | 0.08   | 0.08   | 0.09    | 0.1     | 0.13    |

## 1.3 Consistency check

| Parameter                         | Median (95% CI)    |
|-----------------------------------|--------------------|
| Random Effects Standard Deviation | 8.57 (3.03, 21.72) |

## 1.4 Convergence Diagnostics

| Parameter                     | PSRF |                                                                                                                                                                              |
|-------------------------------|------|------------------------------------------------------------------------------------------------------------------------------------------------------------------------------|
| d.Chlorhexidine.Sucralfate    | 1.00 | Number of chains : 4<br>Tuning iterations : 20,000<br>Simulation iterations : 50,000<br>Thinning interval : 10<br>Inference samples : 10,000<br>Variance scaling factor: 2.5 |
| d.Dexamethasone.Amlexanox     | 1.00 |                                                                                                                                                                              |
| d.Placebo.Aloe                | 1.00 |                                                                                                                                                                              |
| d.Placebo.Dexamethasone       | 1.00 |                                                                                                                                                                              |
| d.Placebo.Doxycycline         | 1.00 |                                                                                                                                                                              |
| d.Placebo.Laser               | 1.01 |                                                                                                                                                                              |
| d.Placebo.Silvernitrate       | 1.00 |                                                                                                                                                                              |
| d.Placebo.Triamcinolone       | 1.01 |                                                                                                                                                                              |
| d.Placebo.Zinc                | 1.59 |                                                                                                                                                                              |
| d.Triamcinolone.Chlorhexidine | 1.00 |                                                                                                                                                                              |
| d.Triamcinolone.Curcumin      | 1.00 |                                                                                                                                                                              |
| sd.d                          | 1.01 |                                                                                                                                                                              |

## 2.Inconsistency Model

## 2.1 Summary estimates

|                        |                      |                        |                        |                        |                        |                        |                        |                       |                        |                        |                        |
|------------------------|----------------------|------------------------|------------------------|------------------------|------------------------|------------------------|------------------------|-----------------------|------------------------|------------------------|------------------------|
| Aloe                   | 7.22 (-35.81, 52.84) | -2.18 (-44.89, 42.62)  | 5.35 (-26.17, 42.91)   | 7.29 (-29.01, 45.57)   | 2.68 (-36.77, 27.63)   | 6.79 (-21.79, 35.22)   | -5.79 (-28.86, 20.75)  | 20.61 (-14.82, 58.39) | 4.19 (-47.24, 56.79)   | 9.62 (-17.50, 32.86)   | 6.17 (-35.93, 39.95)   |
| -1.22 (-52.84, 35.81)  | Ankerrox             | -9.22 (-64.91, 44.78)  | -2.22 (-46.74, 48.16)  | -0.00 (-25.89, 26.29)  | -4.87 (-54.04, 29.90)  | -0.60 (-42.81, 39.92)  | -12.84 (-49.54, 24.41) | 13.98 (-33.09, 59.79) | -3.14 (-63.84, 57.81)  | -5.34 (-48.39, 38.44)  | -0.51 (-53.40, 40.25)  |
| 2.18 (-42.62, 44.89)   | Chlorexidine         | 8.10 (-29.11, 49.08)   | 9.42 (-38.15, 57.97)   | 2.91 (-47.50, 43.54)   | 8.67 (-29.64, 45.45)   | -3.12 (-42.98, 36.53)  | 23.20 (-23.50, 71.45)  | 6.26 (-19.82, 32.20)  | 4.40 (-28.58, 39.02)   | 8.61 (-44.68, 53.66)   |                        |
| -5.35 (-42.91, 26.17)  | Curemn               | -8.10 (-49.08, 29.11)  | 2.04 (-38.40, 38.91)   | -3.38 (-49.24, 24.64)  | 1.88 (-27.16, 22.35)   | -10.90 (-42.26, 16.17) | 15.61 (-26.19, 51.53)  | -1.66 (-50.55, 43.38) | -2.93 (-24.12, 13.87)  | 1.42 (-47.93, 35.10)   |                        |
| -7.29 (-45.57, 29.01)  | Dexamethasone        | -9.42 (-57.97, 38.15)  | -2.04 (-38.91, 39.40)  | -5.25 (-46.22, 2.284)  | -0.67 (-35.26, 31.39)  | -12.79 (-40.44, 14.81) | 13.32 (-25.03, 51.20)  | -3.17 (-58.23, 52.03) | -5.30 (-40.65, 30.00)  | -0.50 (-46.96, 33.59)  |                        |
| -2.68 (-27.63, 36.77)  | Doxycycline          | 4.87 (-29.90, 54.04)   | 3.38 (-24.64, 49.24)   | 5.25 (-22.84, 46.22)   | 4.66 (-17.93, 38.89)   | -8.18 (-22.16, 21.23)  | 17.99 (-7.98, 60.09)   | 2.97 (-43.71, 61.25)  | 0.35 (-24.06, 37.80)   | 5.18 (-25.52, 38.90)   |                        |
| -6.79 (-35.22, 21.79)  | Ester C              | 0.60 (-39.92, 42.81)   | -1.88 (-22.35, 27.16)  | 0.67 (-31.39, 35.26)   | -4.66 (-38.89, 17.93)  | -12.00 (-29.93, 7.52)  | 14.34 (-17.53, 47.33)  | -2.57 (-47.88, 43.83) | -4.69 (-20.15, 13.56)  | -0.08 (-39.34, 30.35)  |                        |
| 5.79 (-20.75, 28.86)   | Folic Acid           | 12.84 (-24.41, 49.54)  | 3.12 (-36.53, 42.98)   | 10.90 (-16.17, 42.26)  | 8.18 (-21.23, 22.16)   | 12.00 (-7.52, 29.93)   | Picacho                | 26.27 (-0.56, 52.70)  | 9.67 (-38.34, 57.39)   | 1.90 (-36.27, 37.25)   | 11.53 (-23.02, 35.05)  |
| -20.61 (-58.39, 14.82) | Gelatin              | -13.38 (-59.79, 33.09) | -23.20 (-71.45, 23.50) | -15.61 (-51.53, 26.19) | -13.32 (-51.20, 23.03) | -17.99 (-60.09, 7.98)  | -14.34 (-47.33, 17.53) | Silver Nitrate        | -16.68 (-71.62, 37.56) | -18.68 (-52.96, 16.61) | -14.11 (-60.48, 19.06) |
| -4.19 (-56.79, 47.24)  | Ibuprofen            | 3.14 (-57.81, 63.84)   | -6.26 (-32.02, 19.82)  | 1.66 (-43.38, 50.95)   | 3.17 (-52.03, 58.23)   | -2.97 (-61.25, 43.71)  | 2.57 (-43.83, 47.88)   | Sucralose             | -1.84 (-44.42, 41.42)  | 2.42 (-56.09, 54.27)   |                        |
| -9.62 (-32.86, 17.50)  | Lactitol             | 5.34 (-38.44, 48.39)   | -4.40 (-39.02, 28.58)  | 2.93 (-13.87, 24.12)   | 5.30 (-30.00, 40.65)   | -0.35 (-37.80, 24.06)  | 4.69 (-13.56, 20.15)   | Tamoxifene            | 4.30 (-38.46, 35.32)   |                        | Zinc                   |
| -6.17 (-39.95, 35.93)  | Vitamin E            | 0.51 (-40.25, 53.40)   | -8.61 (-53.66, 44.86)  | -1.42 (-35.10, 47.93)  | 0.50 (-33.59, 46.96)   | -5.18 (-38.90, 25.52)  | 0.08 (-30.35, 39.34)   |                       |                        |                        |                        |

## 2.2 Inconsistency Factors

| Cycle                         | Median (95% CI)       |
|-------------------------------|-----------------------|
| Laser, Placebo, Triamcinolone | -5.32 (-28.08, 12.93) |

## 2.3 Variance Calculation

| Parameter                         | Median (95% CI)     |
|-----------------------------------|---------------------|
| Random Effects Standard Deviation | 9.36 (1.27, 23.84)  |
| Inconsistency Standard Deviation  | 12.65 (0.78, 25.43) |

## 2.4 Convergence Diagnostics

| Parameter                     | PSRF |  |
|-------------------------------|------|--|
| d.Aloe.Placebo                | 1.08 |  |
| d.Chlorhexidine.Sucralfate    | 1.07 |  |
| d.Dexamethasone.Amlexanox     | 1.08 |  |
| d.Laser.Triamcinolone         | 1.07 |  |
| d.Placebo.Dexamethasone       | 1.06 |  |
| d.Placebo.Doxycycline         | 1.60 |  |
| d.Placebo.Laser               | 1.04 |  |
| d.Placebo.Silvernitrate       | 1.08 |  |
| d.Placebo.Zinc                | 1.46 |  |
| d.Triamcinolone.Chlorhexidine | 1.02 |  |
| d.Triamcinolone.Curcumin      | 1.08 |  |
| w.Laser.Placebo.Triamcinolone | 1.04 |  |
| sd.d                          | 2.00 |  |
| sd.w                          | 1.00 |  |

Number of chains : 4

Tuning iterations : 20,000

Simulation iterations : 50,000

Thinning interval : 10

Inference samples : 10,000

Variance scaling factor: 2.5

## 3. Node-splitting analysis

| Name                   | Direct Effect         | Indirect Effect       | Overall               | P-Value |
|------------------------|-----------------------|-----------------------|-----------------------|---------|
| Laser, Placebo         | -9.19 (-26.50, 11.28) | -23.95 (-49.70, 4.00) | -14.63 (-28.41, 3.42) | 0.24    |
| Laser, Triamcinolone   | -6.77 (-25.31, 12.97) | 9.13 (-21.39, 43.63)  | -2.08 (-15.95, 12.27) | 0.31    |
| Placebo, Triamcinolone | 17.68 (-4.24, 40.87)  | 2.27 (-24.74, 26.04)  | 12.56 (-6.58, 27.34)  | 0.23    |

## 4. Network structure

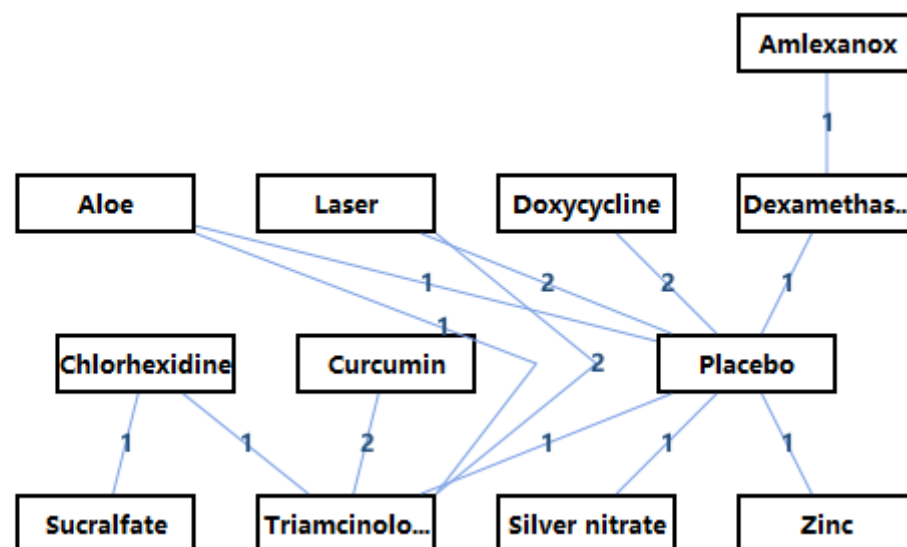

## Day 8

### 1. Consistency Model

#### 1.1 Summary estimates

|                       |                        |                      |                        |                        |                        |
|-----------------------|------------------------|----------------------|------------------------|------------------------|------------------------|
| Benzydamine           | -12.99 (-32.92, 12.62) | 13.14 (-2.11, 28.07) | -0.11 (-10.10, 10.43)  | -0.24 (-10.39, 10.39)  | -11.47 (-22.19, 0.55)  |
| 12.99 (-12.62, 32.92) | Chlorhexidine          | 25.39 (-1.50, 48.30) | 13.02 (-11.37, 31.84)  | 12.83 (-11.63, 31.84)  | 1.88 (-19.09, 17.00)   |
| -13.14 (-28.07, 2.11) | -25.39 (-48.30, 1.50)  | Dexamethasone        | -12.86 (-24.79, -0.78) | -12.95 (-24.20, -1.97) | -24.18 (-38.72, -9.63) |
| 0.11 (-10.43, 10.10)  | -13.02 (-31.84, 11.37) | 12.86 (0.78, 24.79)  | Doxycycline            | -0.09 (-5.05, 4.62)    | -11.12 (-20.78, -1.93) |
| 0.24 (-10.39, 10.39)  | -12.83 (-31.84, 11.63) | 12.95 (1.97, 24.20)  | 0.09 (-4.62, 5.05)     | Placebo                | -11.10 (-20.96, -1.34) |
| 11.47 (-0.55, 22.19)  | -1.88 (-17.00, 19.09)  | 24.18 (9.63, 38.72)  | 11.12 (1.93, 20.78)    | 11.10 (1.34, 20.96)    | Triamcinolone          |

#### 1.2 Rank probability(Rank 1 is best, rank N is worst)

| Drug          | Rank 1 | Rank 2 | Rank 3 | Rank 4 | Rank 5 | Rank 6 |
|---------------|--------|--------|--------|--------|--------|--------|
| Benzydamine   | 0.03   | 0.37   | 0.15   | 0.34   | 0.1    | 0.02   |
| Chlorhexidine | 0.03   | 0.14   | 0.05   | 0.03   | 0.21   | 0.54   |
| Dexamethasone | 0.93   | 0.05   | 0.01   | 0.01   | 0      | 0      |
| Doxycycline   | 0.01   | 0.23   | 0.4    | 0.29   | 0.07   | 0      |
| Placebo       | 0      | 0.21   | 0.39   | 0.31   | 0.08   | 0.01   |
| Triamcinolone | 0      | 0      | 0.01   | 0.02   | 0.54   | 0.43   |

#### 1.3 Consistency check

|                                   |                    |
|-----------------------------------|--------------------|
| Parameter                         | Median (95% CI)    |
| Random Effects Standard Deviation | 1.56 (0.10, 10.03) |

#### 1.4 Convergence Diagnostics

| Parameter                     | PSRF | Number of chains : 4           |
|-------------------------------|------|--------------------------------|
| d.Placebo.Benzydamine         | 1.00 | Tuning iterations : 20,000     |
| d.Placebo.Dexamethasone       | 1.01 | Simulation iterations : 50,000 |
| d.Placebo.Doxycycline         | 1.00 | Thinning interval : 10         |
| d.Placebo.Triamcinolone       | 1.00 | Inference samples : 10,000     |
| d.Triamcinolone.Chlorhexidine | 4.64 | Variance scaling factor: 2.5   |
| sd.d                          | 1.01 |                                |

### 2.Inconsistency Model

#### 2.1 Summary estimates

|                       |                        |                      |                       |                        |                        |
|-----------------------|------------------------|----------------------|-----------------------|------------------------|------------------------|
| Benzydamine           | -9.51 (-30.86, 13.71)  | 12.49 (-4.10, 30.96) | 0.51 (-10.65, 12.45)  | -0.52 (-11.49, 11.30)  | -10.30 (-23.01, 1.17)  |
| 9.51 (-13.71, 30.86)  | Chlorhexidine          | 22.44 (-3.96, 46.40) | 10.50 (-12.93, 30.73) | 9.72 (-13.84, 30.26)   | -0.85 (-21.51, 16.68)  |
| -12.49 (-30.96, 4.10) | -22.44 (-46.40, 3.96)  | Dexamethasone        | -11.98 (-27.24, 1.26) | -12.74 (-26.59, -0.65) | -22.92 (-42.43, -7.14) |
| -0.51 (-12.45, 10.65) | -10.50 (-30.73, 12.93) | 11.98 (-1.26, 27.24) | Doxycycline           | -0.73 (-6.76, 4.72)    | -11.08 (-22.32, -0.92) |
| 0.52 (-11.30, 11.49)  | -9.72 (-30.26, 13.84)  | 12.74 (0.65, 26.59)  | 0.73 (-4.72, 6.76)    | Placebo                | -10.24 (-21.33, 0.32)  |
| 10.30 (-1.17, 23.01)  | 0.85 (-16.68, 21.51)   | 22.92 (7.14, 42.43)  | 11.08 (0.92, 22.32)   | 10.24 (-0.32, 21.33)   | Triamcinolone          |

#### 2.2 Variance Calculation

|                                   |                    |
|-----------------------------------|--------------------|
| Parameter                         | Median (95% CI)    |
| Random Effects Standard Deviation | 2.06 (0.09, 10.83) |
| Inconsistency Standard Deviation  | 6.48 (0.26, 12.58) |

## 2.3 Convergence Diagnostics

| Parameter                     | PSRF | Number of chains : 4           |
|-------------------------------|------|--------------------------------|
| d.Benzydamine.Doxycycline     | 1.02 | Tuning iterations : 20,000     |
| d.Doxycycline.Placebo         | 1.11 | Simulation iterations : 50,000 |
| d.Placebo.Dexamethasone       | 1.01 | Thinning interval : 10         |
| d.Placebo.Triamcinolone       | 1.01 | Inference samples : 10,000     |
| d.Triamcinolone.Chlorhexidine | 1.00 | Variance scaling factor: 2.5   |
| sd.d                          | 1.02 |                                |
| sd.w                          | 1.00 |                                |

## 3. Node-splitting analysis

| Name                       | Direct Effect          | Indirect Effect         | Overall                | P-Value |
|----------------------------|------------------------|-------------------------|------------------------|---------|
| Doxycycline, Triamcinolone | -10.89 (-22.76, -0.56) | -0.64 (-383.98, 380.63) | -11.12 (-20.78, -1.93) | 0.96    |
| Placebo, Triamcinolone     | -11.15 (-22.38, 0.27)  | 1.43 (-381.59, 374.20)  | -11.10 (-20.96, -1.34) | 0.95    |

## 4. Network structure

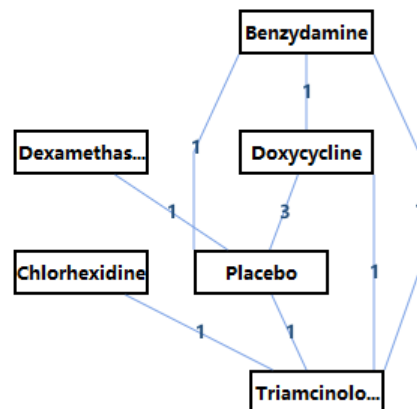

## Day 10

### 1. Consistency Model

#### 1.1 Summary estimates

|                       |                       |                       |                        |                        |                        |                       |
|-----------------------|-----------------------|-----------------------|------------------------|------------------------|------------------------|-----------------------|
| Benzydamine           | -0.13 (-24.02, 23.63) | 8.58 (-20.45, 36.99)  | -3.88 (-21.34, 10.69)  | -7.56 (-34.90, 13.44)  | -7.97 (-27.63, 6.47)   | -0.02 (-16.65, 16.99) |
| 0.13 (-23.63, 24.02)  | Chlorhexidine         | 8.63 (-21.61, 37.92)  | -3.80 (-27.45, 17.84)  | -7.44 (-39.68, 18.42)  | -7.87 (-33.97, 13.21)  | 0.09 (-16.85, 17.08)  |
| -8.58 (-36.99, 20.45) | -8.63 (-37.92, 21.61) | Curcumin              | -12.66 (-41.78, 15.00) | -16.80 (-51.89, 14.80) | -16.97 (-47.99, 10.54) | -8.55 (-31.87, 15.78) |
| 3.88 (-10.69, 21.34)  | 3.80 (-17.84, 27.45)  | 12.66 (-15.00, 41.78) | Doxycycline            | -3.64 (-25.14, 14.67)  | -3.91 (-15.61, 5.00)   | 3.97 (-10.57, 21.29)  |
| 7.56 (-13.44, 34.90)  | 7.44 (-18.42, 39.68)  | 16.80 (-14.80, 51.89) | 3.64 (-14.67, 25.14)   | Laser                  | -0.13 (-16.70, 16.64)  | 7.58 (-12.92, 34.99)  |
| 7.97 (-6.47, 27.63)   | 7.87 (-13.21, 33.97)  | 16.97 (-10.54, 47.99) | 3.91 (-5.00, 15.61)    | 0.13 (-16.64, 16.70)   | Placebo                | 8.09 (-6.64, 27.60)   |
| 0.02 (-16.99, 16.65)  | -0.09 (-17.08, 16.85) | 8.55 (-15.78, 31.87)  | -3.97 (-21.29, 10.57)  | -7.58 (-34.99, 12.92)  | -8.09 (-27.60, 6.64)   | Triamcinolone         |

#### 1.2 Rank probability(Rank 1 is best, rank N is worst)

| Drug          | Rank 1 | Rank 2 | Rank 3 | Rank 4 | Rank 5 | Rank 6 | Rank 7 |
|---------------|--------|--------|--------|--------|--------|--------|--------|
| Benzydamine   | 0.14   | 0.23   | 0.2    | 0.21   | 0.11   | 0.07   | 0.05   |
| Chlorhexidine | 0.14   | 0.24   | 0.17   | 0.14   | 0.11   | 0.09   | 0.11   |
| Curcumin      | 0.6    | 0.12   | 0.08   | 0.06   | 0.04   | 0.04   | 0.06   |
| Doxycycline   | 0.03   | 0.07   | 0.13   | 0.22   | 0.33   | 0.16   | 0.06   |
| Laser         | 0.04   | 0.07   | 0.07   | 0.09   | 0.14   | 0.19   | 0.4    |
| Placebo       | 0      | 0.02   | 0.04   | 0.08   | 0.16   | 0.4    | 0.3    |
| Triamcinolone | 0.05   | 0.24   | 0.33   | 0.2    | 0.1    | 0.06   | 0.02   |



### 1.3 Consistency check

| Parameter                         | Median (95% CI)    |
|-----------------------------------|--------------------|
| Random Effects Standard Deviation | 8.08 (2.39, 11.75) |

### 1.4 Convergence Diagnostics

| Parameter                     | PSRF | Number of chains : 4           |
|-------------------------------|------|--------------------------------|
| d.Placebo.Benzylamine         | 1.29 | Tuning iterations : 20,000     |
| d.Placebo.Doxycycline         | 1.21 | Simulation iterations : 50,000 |
| d.Placebo.Laser               | 1.02 | Thinning interval : 10         |
| d.Placebo.Triamcinolone       | 1.30 | Inference samples : 10,000     |
| d.Triamcinolone.Chlorhexidine | 1.02 | Variance scaling factor: 2.5   |
| d.Triamcinolone.Curcumin      | 1.01 |                                |
| sd.d                          | 1.51 |                                |

## 2.Inconsistency Model

### 2.1 Summary estimates

|                       |                       |                       |                        |                        |                        |                       |
|-----------------------|-----------------------|-----------------------|------------------------|------------------------|------------------------|-----------------------|
| Benzylamine           | 0.12 (-22.25, 22.64)  | 8.86 (-19.00, 36.44)  | -3.23 (-18.42, 10.84)  | -6.51 (-28.92, 14.31)  | -6.50 (-21.76, 7.57)   | -0.10 (-15.59, 15.98) |
| -0.12 (-22.64, 22.25) | Chlorhexidine         | 8.66 (-18.53, 35.77)  | -3.35 (-25.29, 18.10)  | -6.55 (-34.20, 19.66)  | -6.58 (-29.19, 14.60)  | -0.05 (-15.86, 15.76) |
| -8.86 (-36.44, 19.00) | -8.66 (-35.77, 18.53) | Curcumin              | -12.08 (-39.38, 14.82) | -15.60 (-46.80, 15.51) | -15.40 (-42.92, 11.22) | -8.75 (-31.44, 14.23) |
| 3.23 (-10.84, 18.42)  | 3.35 (-18.10, 25.29)  | 12.08 (-14.82, 39.38) | Doxycycline            | -3.25 (-21.62, 14.38)  | -3.17 (-12.83, 5.82)   | 3.23 (-11.22, 18.76)  |
| 6.51 (-14.31, 28.92)  | 6.55 (-19.66, 34.20)  | 15.60 (-15.51, 46.80) | 3.25 (-14.38, 21.62)   | Laser                  | 0.16 (-15.89, 15.61)   | 6.64 (-14.49, 28.81)  |
| 6.50 (-7.57, 21.76)   | 6.58 (-14.60, 29.19)  | 15.40 (-11.22, 42.92) | 3.17 (-5.82, 12.83)    | -0.16 (-15.61, 15.89)  | Placebo                | 6.50 (-7.74, 22.38)   |
| 0.10 (-15.98, 15.59)  | 0.05 (-15.76, 15.86)  | 8.75 (-14.23, 31.44)  | -3.23 (-18.76, 11.22)  | -6.64 (-28.81, 14.49)  | -6.50 (-22.38, 7.74)   | Triamcinolone         |

### 2.2 Variance Calculation

| Parameter                         | Median (95% CI)    |
|-----------------------------------|--------------------|
| Random Effects Standard Deviation | 7.15 (2.76, 11.57) |
| Inconsistency Standard Deviation  | 6.08 (0.30, 11.66) |

### 2.3 Convergence Diagnostics

| Parameter                     | PSRF | Number of chains : 4           |
|-------------------------------|------|--------------------------------|
| d.Benzylamine.Doxycycline     | 1.00 | Tuning iterations : 20,000     |
| d.Doxycycline.Placebo         | 1.00 | Simulation iterations : 50,000 |
| d.Placebo.Laser               | 1.00 | Thinning interval : 10         |
| d.Placebo.Triamcinolone       | 1.00 | Inference samples : 10,000     |
| d.Triamcinolone.Chlorhexidine | 1.00 | Variance scaling factor: 2.5   |
| d.Triamcinolone.Curcumin      | 1.00 |                                |
| sd.d                          | 1.00 |                                |
| sd.w                          | 1.00 |                                |

## 3. Node-splitting analysis

| Name                       | Direct Effect        | Indirect Effect         | Overall              | P-Value |
|----------------------------|----------------------|-------------------------|----------------------|---------|
| Doxycycline, Triamcinolone | 0.07 (-16.35, 16.57) | -3.87 (-355.67, 356.11) | 3.97 (-10.57, 21.29) | 0.98    |
| Placebo, Triamcinolone     | 9.71 (-4.44, 28.47)  | 8.71 (-337.74, 358.78)  | 8.09 (-6.64, 27.60)  | 1       |

#### 4. Network structure

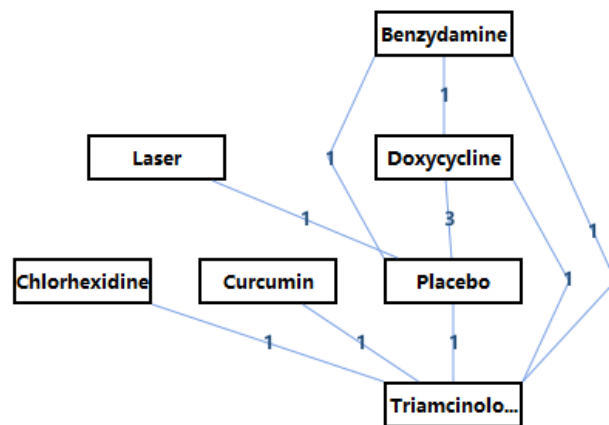

**Chart S1 “Time-Rank 1 probability” folding line chart**

In order to clearly demonstrate the effect of the different local interventions on ulcer size reduction and symptom reduction at the various stages of the trial, we plot line graphs on time-rank 1 probability. The solid points represent the real results obtained and the hollow points are only dummy values introduced to represent the trend in the effect of the local intervention according to a linear equation.

size-reducing effect

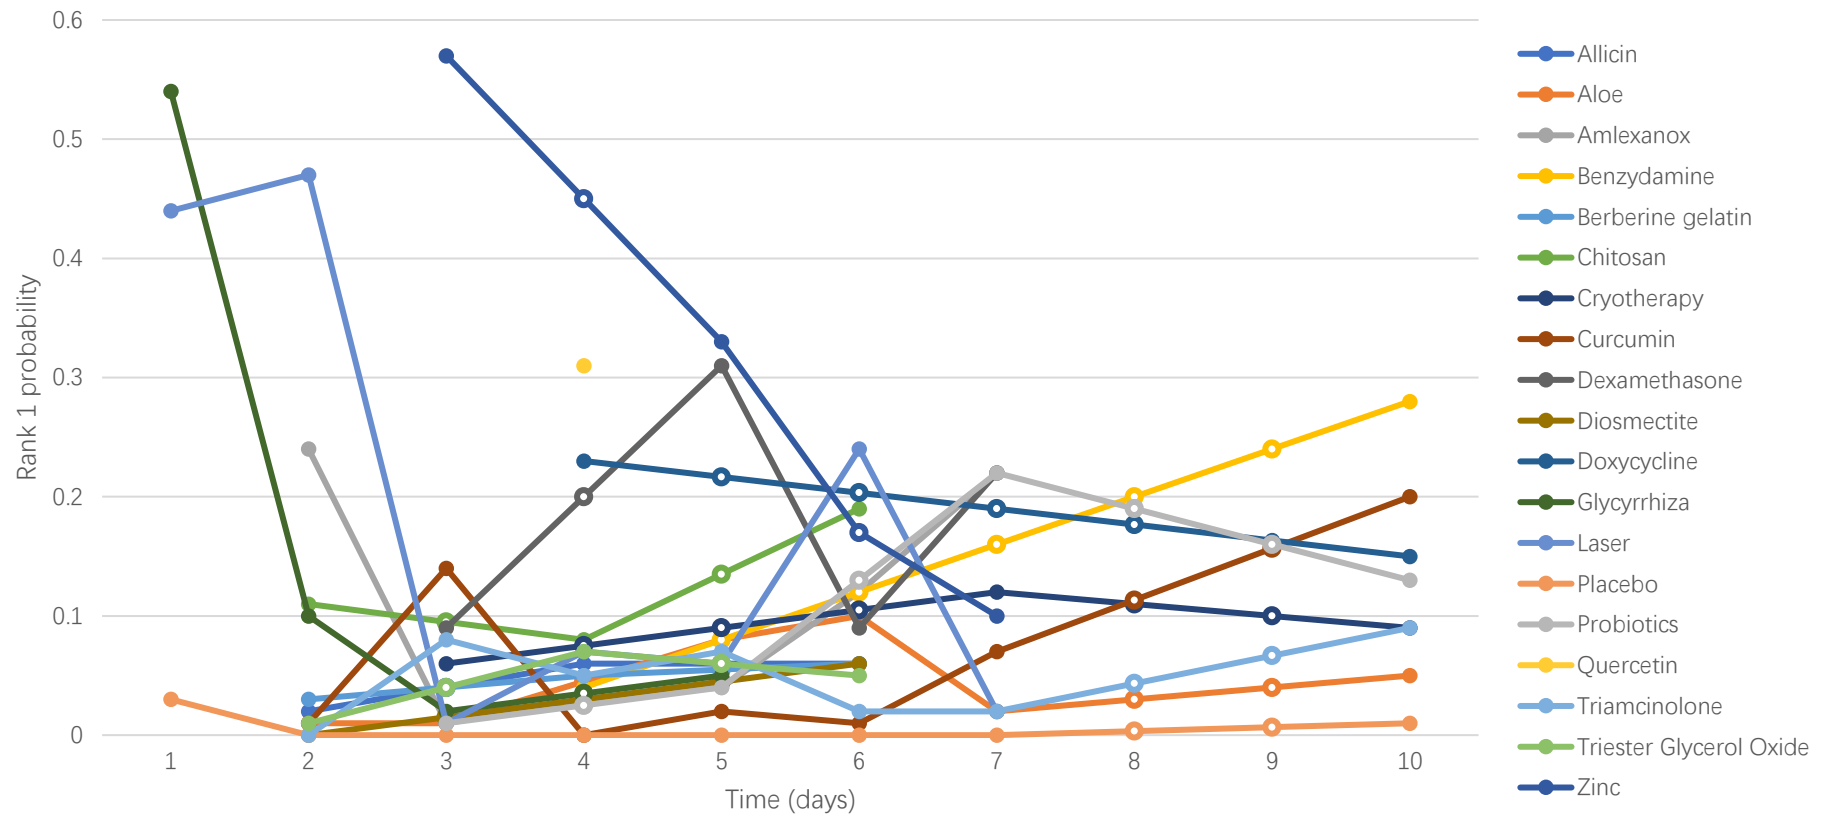

symptom-reducing effect

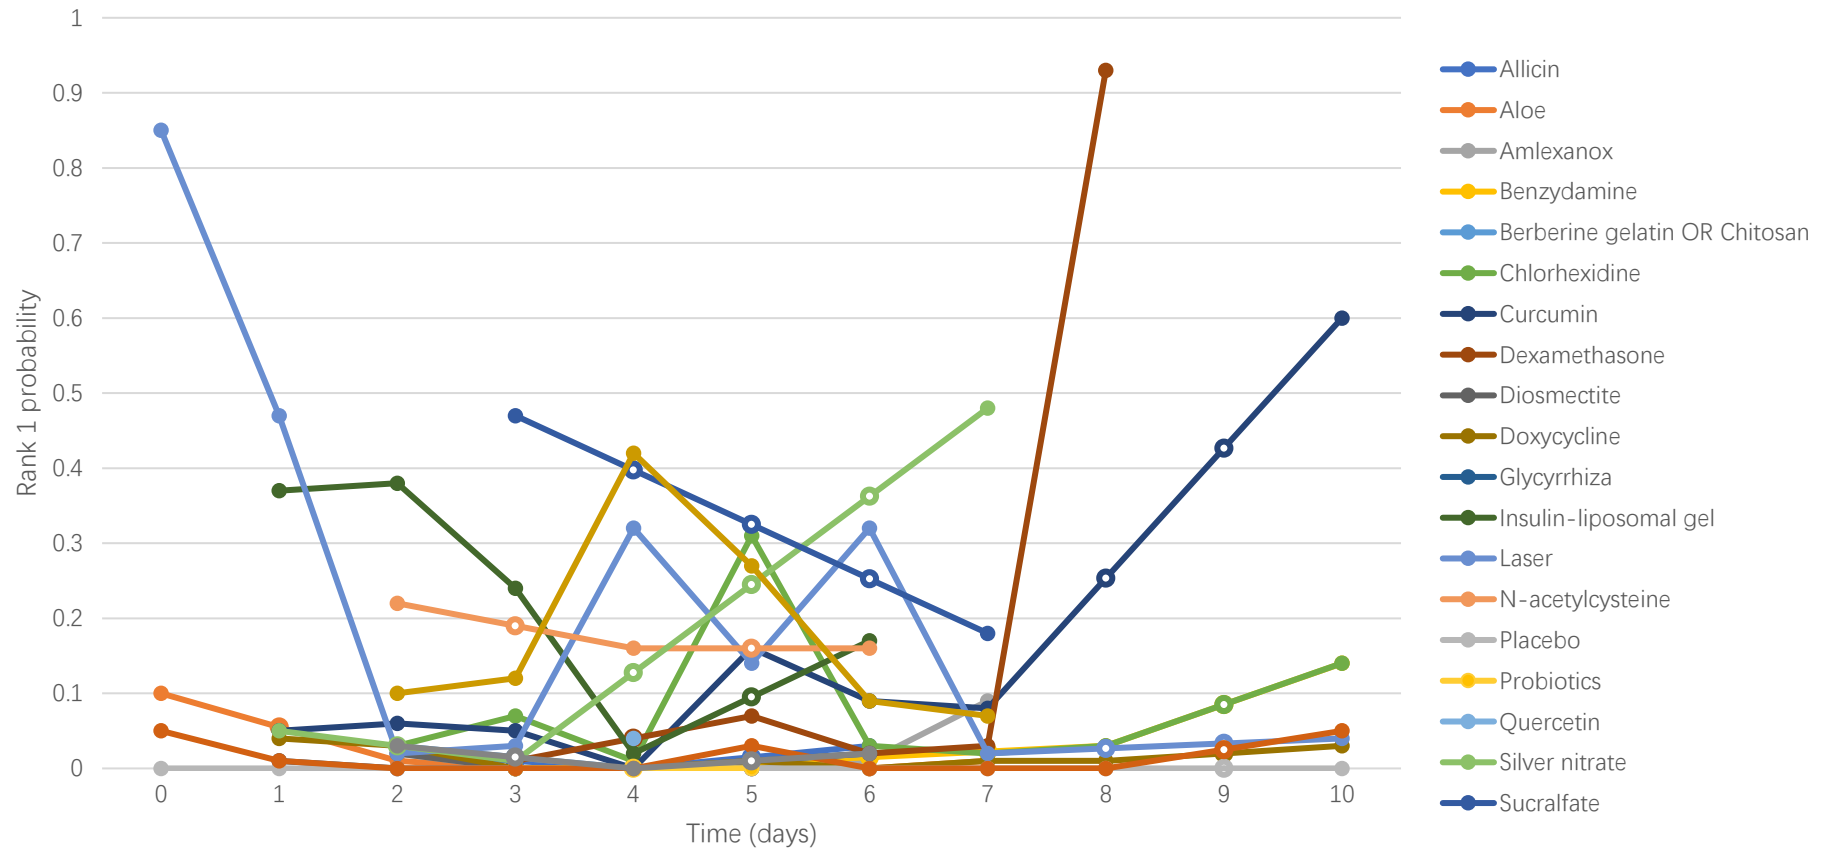

## Chapter S4 Safety outcomes

### Adverse effect

36 RCTs included in the study reported on the side effects of the topical interventions.

| Interventions           | RCTs | Events                                                                                                               | Total |
|-------------------------|------|----------------------------------------------------------------------------------------------------------------------|-------|
| Allicin                 | 1    | 0                                                                                                                    | 48    |
| Aloe                    | 1    | 0                                                                                                                    | 60    |
| Amlexanox               | 5    | 9 (4 report local, transient “stinging”, 3 report "cooling" sensation and 3 report metallic taste)                   | 328   |
| Benzydamine             | 1    | 0                                                                                                                    | 10    |
| Berberine gelatin       | 1    | 0                                                                                                                    | 48    |
| Chitosan                | 2    | 1 (mild throat sore and bad taste)                                                                                   | 54    |
| Chlorhexidine           | 1    | 0                                                                                                                    | 35    |
| Curcumin                | 4    | 0                                                                                                                    | 117   |
| Dexamethasone           | 1    | 4 (slight rash surrounding the mouth, a burning sensation in the larynx, or a stimulant pain at the medication site) | 120   |
| Diosmectite             | 1    | 0                                                                                                                    | 35    |
| Doxycycline             | 3    | 9(1 report short burning sensation, 8 report transient bitter sensation )                                            | 60    |
| Glycyrrhiza             | 1    | 0                                                                                                                    | 20    |
| Honey                   | 2    | 0                                                                                                                    | 92    |
| Laser                   | 5    | 0                                                                                                                    | 95    |
| Penicillin              | 1    | 3 (minor burning sensation)                                                                                          | 25    |
| Probiotics              | 2    | 0                                                                                                                    | 25    |
| Silver nitrate          | 2    | 0                                                                                                                    | 60    |
| Sucralfate              | 1    | 0                                                                                                                    | 35    |
| Triamcinolone           | 9    | 0                                                                                                                    | 259   |
| Triester Glycerol Oxide | 1    | 0                                                                                                                    | 56    |
| Zinc                    | 1    | 0                                                                                                                    | 23    |

1.Consistency Model

Summary estimates for averse effect

The estimate values for adverse effect are given as risk difference (RD) and 95% confidence interval (CI). The table shows the pooled estimates based on the network meta-analysis during the treatment period for each study.

|                        |                        |                                                                |                                              |                                                                   |                                                                |                                              |                                          |                                             |
|------------------------|------------------------|----------------------------------------------------------------|----------------------------------------------|-------------------------------------------------------------------|----------------------------------------------------------------|----------------------------------------------|------------------------------------------|---------------------------------------------|
| Alice                  | 0.00 (0.00, 1.2801)    | 0.00 (0.00, 6.7795612)                                         | 29743559.73 (0.00, 1.95.50 (0.00, 5.855834)  | 0.10 (0.00, 3.1074703)                                            | 488139.21 (0.00, 3.88)                                         | 0.23 (0.00, 5.1724186)                       | 30463.40 (0.00, 4.235)                   | 971619.18 (0.00, 3.30)                      |
| 1779.43 (0.00, 1.2801) | Age                    | 15406588244.49 (0.0358636.95 (0.00, 4.44)                      | 353.77 (0.00, 6.19917)                       | 2375935428.17 (0.00, 42.89 (0.00, 2.590922)                       | 4255653.14 (0.00, 1.7)                                         | 625925929.84 (0.00, 0.00)                    | 98262861 (0.00, 2.7443474)               | 0.00 (0.00, 3.5039437)                      |
| 0.01 (0.00, 2.9259572) | Amlexarox              | 0.00 (0.00, 2.4059808)                                         | 91091.27 (0.00, 3.948)                       | Benzdamine                                                        | 0.01 (0.00, 8.5083806)                                         | 178.26 (0.00, 1.54837)                       | 0.01 (0.00, 1.6464214)                   | 0.00 (0.00, 2.4032678)                      |
| 0.01 (0.00, 1.9271667) | 0.00 (0.00, 1.5599742) | 86904344.51 (0.00, 3.151.75 (0.00, 3.52718)                    | 0.01 (0.00, 8.5083806)                       | 178.26 (0.00, 1.54837)                                            | 0.01 (0.00, 1.6464214)                                         | 0.00 (0.00, 2.4032678)                       | 0.00 (0.00, 1.5711136)                   | 0.00 (0.00, 1.8410647)                      |
| 9.76 (0.00, 1.1342492) | 0.00 (0.00, 6.3626914) | 299.48 (0.00, 1.88077)                                         | 0.01 (0.00, 3.0363564)                       | 0.00 (0.00, 9.8707875)                                            | 2052733.92 (0.00, 5.5)                                         | 0.20 (0.00, 4.9595304)                       | 10236.77 (0.00, 1.389)                   | 3690931.68 (0.00, 1.6)                      |
| 0.00 (0.00, 1.3881182) | 0.02 (0.00, 4.4161219) | 8475814.80 (0.00, 1.92.96 (0.00, 1.236731)                     | 4.93 (0.00, 1.4399524)                       | 2035525.09 (0.00, 6.4)                                            | Clozetasci                                                     | 0.00 (0.00, 1.7287171)                       | 0.00 (0.00, 4.3748785)                   | 11.22 (0.00, 7.559230)                      |
| 4.37 (0.00, 1.3881182) | 0.00 (0.00, 2.7721300) | 17259.99 (0.00, 6.682)                                         | 0.05 (0.00, 2.4395746)                       | 0.00 (0.00, 5.0818455)                                            | 222.26 (0.00, 3.66016)                                         | 0.00 (0.00, 1.0637383)                       | 14891.99 (0.00, 2.269)                   | 2610072.73 (0.00, 7.1)                      |
| 0.00 (0.00, 1.5581864) | 0.00 (0.00, 2.7721300) | 17259.99 (0.00, 6.682)                                         | 0.05 (0.00, 2.4395746)                       | 0.00 (0.00, 5.0818455)                                            | 222.26 (0.00, 3.66016)                                         | 0.00 (0.00, 1.0637383)                       | 14891.99 (0.00, 2.269)                   | 2610072.73 (0.00, 7.1)                      |
| 0.00 (0.00, 2.7013289) | 0.00 (0.00, 7.2925201) | 29.91 (0.08, 1.8750.26 (0.00, 1.2955323)                       | 0.00 (0.00, 5.8074401)                       | 0.09 (0.00, 6.4455000)                                            | 0.00 (0.00, 6.8097053)                                         | 0.00 (0.00, 2.1374551)                       | 541.06 (0.00, 2.35778)                   | 133596.25 (0.00, 3.06)                      |
| 0.12 (0.00, 5.2192537) | 0.00 (0.00, 1.0390338) | 4240298.60 (0.00, 7.5)                                         | 22.84 (0.00, 1.024881)                       | 0.01 (0.00, 6.9936172)                                            | 7337.77 (0.00, 5.592)                                          | 0.02 (0.00, 2.1374551)                       | 541.06 (0.00, 2.35778)                   | 133596.25 (0.00, 3.06)                      |
| 0.00 (0.00, 1.0925525) | 0.00 (0.00, 5.0043209) | 0.00 (0.00, 1.53)                                              | 0.00 (0.00, 3.6427266)                       | 0.00 (0.00, 2.1895129)                                            | 0.00 (0.00, 8.1447246)                                         | 0.00 (0.00, 3.4147359)                       | 0.00 (0.00, 1.6502032)                   | 0.00 (0.00, 0.06)                           |
| 13.67 (0.00, 1.771286) | 0.00 (0.00, 1.9226614) | 286314486.75 (0.00, 7.742.05 (0.00, 6.5204)                    | 1.77 (0.00, 5.1396439)                       | 9486779.95 (0.00, 29.5.81 (0.00, 6.6181361)                       | 68947.82 (0.00, 1.899)                                         | 8338551.59 (0.00, 2.2)                       | 510558.19 (0.00, 1.12)                   | 241.04 (0.00, 4.75799)                      |
| 510558.19 (0.00, 1.12) | 241.04 (0.00, 4.75799) | 2357303542236.30 (2.89254382.66 (0.00, 9.579.77 (0.00, 1.9191) | 3111833965.72 (0.00, 8.853.42 (0.00, 2.3398) | 114289569.02 (0.00, 8.3222103031.52 (0.00, 4.155 (0.00, 8.980422) | 0.28 (0.00, 8.5242948)                                         | 1562196143.41 (0.00, 3.23830.39 (0.00, 1.48) | 1553.83 (0.00, 4.2529)                   | 165292229.76 (0.00, 1.79.19 (0.00, 1.86861) |
| 41.55 (0.00, 8.980422) | 0.28 (0.00, 8.5242948) | 1562196143.41 (0.00, 3.23830.39 (0.00, 1.48)                   | 1553.83 (0.00, 4.2529)                       | 165292229.76 (0.00, 1.79.19 (0.00, 1.86861)                       | 317660.64 (0.00, 5.78)                                         | 48425776.88 (0.00, 1.1)                      | 1.19 (0.00, 3.4653363)                   | 0.00 (0.00, 1.8056717)                      |
| 1.19 (0.00, 3.4653363) | 0.00 (0.00, 3.490516)  | 20.00 (0.00, 3.45)                                             | 0.00 (0.00, 1.9470081)                       | 0.00 (0.00, 1.0179858)                                            | 0.00 (0.00, 4.3915386)                                         | 0.00 (0.00, 8.4338449)                       | 0.00 (0.00, 2.3105133)                   | 0.00 (0.00, 0.10)                           |
| 0.00 (0.00, 1.2424267) | 0.00 (0.00, 3.1435817) | 11.87 (0.28, 1.221.84)                                         | 0.00 (0.00, 3.8291446)                       | 0.00 (0.00, 2.8771294)                                            | 0.04 (0.00, 2.5336157)                                         | 0.00 (0.00, 2.8099223)                       | 0.00 (0.00, 2.9768411)                   | 0.44 (0.00, 3.9.68)                         |
| 0.00 (0.00, 9.8107911) | 0.00 (0.00, 2.3909266) | 18560648162.68 (0.01903891.94 (0.00, 4.6                       | 96.44 (0.00, 1.725994)                       | 1631705442.78 (0.00, 9.85.08 (0.00, 2.04170)                      | 10744120.37 (0.00, 2.685908650.27 (0.00, 1.421721 (0.00, 2.848 | 6.32 (0.00, 2.3909266)                       | 18560648162.68 (0.01903891.94 (0.00, 4.6 | 96.44 (0.00, 1.725994)                      |
| 9.53 (0.00, 6.5559000) | 0.03 (0.00, 4.3838884) | 634303158.67 (0.00, 1.2978.14 (0.00, 4.375)                    | 78.64 (0.00, 6.700159)                       | 77513643.34 (0.00, 1.398.10 (0.00, 6.92762)                       | 236305.11 (0.00, 1.67)                                         | 22182114.23 (0.00, 6                         | 97756864232858512                        | 405677176194523.2                           |
| 97756864232858512      | 405677176194523.2      | 155874285730178924                                             | 43553105408361314                            | 4630196115201825                                                  | 18618815108529743                                              | 65679154382844456                            | 73410790396307734                        | 20570651302716812                           |
| 6.75 (0.00, 1.6274194) | 0.00 (0.00, 2.3290053) | 248042441.84 (0.00, 1.968.29 (0.00, 3.5089)                    | 0.50 (0.00, 2.3620006)                       | 1303905.50 (0.00, 5.7)                                            | 1.01 (0.00, 1.8551345)                                         | 819.39 (0.00, 1.15557)                       | 8362648.73 (0.00, 9.3                    | 25.84 (0.00, 1.738817)                      |
| 25.84 (0.00, 1.738817) | 0.03 (0.00, 1.7928084) | 304885285.84 (0.00, 2.52.70 (0.00, 4.81991)                    | 0.96 (0.00, 4.0952882)                       | 8737844.55 (0.00, 4.5)                                            | 0.53 (0.00, 1.2379849)                                         | 111743.09 (0.00, 2.72)                       | 10359459.65 (0.00, 6                     |                                             |

|                   |                   |                      |                       |                       |                       |                      |                   |                   |                   |                   |                       |                 |                 |                 |                  |
|-------------------|-------------------|----------------------|-----------------------|-----------------------|-----------------------|----------------------|-------------------|-------------------|-------------------|-------------------|-----------------------|-----------------|-----------------|-----------------|------------------|
| 8.07              | (0.00, 14245820   | 179159184019466.6    | (0.07 (0.00, 74417800 | (0.00 (0.00, 67673897 | (0.02 (0.00, 91598076 | 0.84                 | (0.00, 14473074   | 11995410744985566 | 2081706.29        | (0.00, 62         | (0.00 (0.00, 49806243 |                 |                 |                 |                  |
| 26577.60          | (0.00, 8983       | 16762833642392474    | 236.82                | (0.00, 510091         | (0.00 (0.00, 18211922 | 3.62                 | (0.00, 76243181   | 3847.17           | (0.00, 52303      | 14291063434929485 | 1338904140.46         | (0.00           | 0.16            | (0.00, 31799259 |                  |
| 0.00              | (0.00, 81521727   | 1395278.26           | (0.65, 26             | 0.00 (0.00, 47915409  | (0.00 (0.00, 42037465 | 0.00 (0.00, 39903372 | 0.00              | (0.00, 31774052   | 7789711215.21     | (0.29             | 0.08                  | (0.00, 3.52)    | 0.00            | (0.00, 71629218 |                  |
| 0.04              | (0.00, 44096871   | 524088819802.66      | (0                    | (0.00 (0.00, 14235591 | (0.00 (0.00, 24955402 | 0.00 (0.00, 14645864 | 0.01              | (0.00, 11460975   | 13028662979938912 | 6996.16           | (0.00, 24614          | 0.00            | (0.00, 95606285 |                 |                  |
| 82.04             | (0.00, 8928644    | 3254276114437173     | (0.56 (0.00, 37165177 | 0.00 (0.00, 39308743  | 0.00 (0.00, 45789221  | 65.90                | (0.00, 1020745    | 14084693526390493 | 7939707.38        | (0.00, 30         | 0.01                  | (0.00, 46881564 |                 |                 |                  |
| 0.00              | (0.00, 86014641   | 3560728226.33        | (0.00                 | (0.00 (0.00, 14984363 | 0.00 (0.00, 98007152  | 0.00 (0.00, 11598082 | 0.00              | (0.00, 10970948   | 12411002727300.38 | 23.86             | (0.00, 1372103        | 0.00            | (0.00, 26401373 |                 |                  |
| 54.19             | (0.00, 5285005    | 367785632764922.5    | (0.17 (0.00, 11575467 | 0.00 (0.00, 12274737  | 0.01 (0.00, 24799032  | 45.64                | (0.00, 5659900    | 25737532503420314 | 6100256.94        | (0.00, 13         | 0.00                  | (0.00, 58430438 |                 |                 |                  |
| 0.00              | (0.00, 28850985   | 90780915358.26       | (0                    | 0.00 (0.00, 18164450  | 0.00 (0.00, 74339734  | 0.00 (0.00, 11261167 | 0.00              | (0.00, 25822676   | 1869763179827788  | (1350.55          | (0.00, 40061          | 0.00            | (0.00, 11177273 |                 |                  |
| 0.00              | (0.00, 22294281   | 40345058.39          | (17.51, 0.00          | (0.00, 13733717       | 0.00 (0.00, 14795078  | 0.00 (0.00, 12333577 | 0.00              | (0.00, 88681834   | 219021826291.38   | (9                | 2.26                  | (0.03, 202.63)  | 0.00            | (0.00, 28340018 |                  |
| Phosmetite        |                   | 20134650118030.25    | 0.00                  | (0.00, 79541098       | 0.00 (0.00, 25718931  | 0.00 (0.00, 13535773 | 1.15              | (0.00, 18908035   | 64532567030743680 | 297291.60         | (0.00, 497            | 0.00            | (0.00, 26028447 |                 |                  |
| 0.00              | (0.00, 30066570   | Dowsyline            |                       | 0.00                  | (0.00, 15788394       | 0.00 (0.00, 59841474 | 0.00              | (0.00, 875.10)    | 0.00              | (0.00, 13756889   | 3885.43               | (0.00, 61929    | 0.00            | (0.00, 30368085 |                  |
| 367.00            | (0.00, 119978     | 6660105593931289     | (CNCyrtHz2            |                       | 0.00                  | (0.00, 28768137      | 0.01              | (0.00, 41191073   | 72.89             | (0.00, 8926664    | 22434624791409250     | 18198051.83     | (0.00, 5        | 0.00            | (0.00, 15112021  |
| 6628256.69        | (0.00, 14         | 15765004434093180    | 14188.85              | (0.00, 1878           | money                 | 163.62               | (0.00, 150275     | 804045.86         | (0.00, 508        | 42442200157852845 | 181239811725.30       | (0              | 8.25            | (0.00, 25762060 |                  |
| 1600.59           | (0.00, 20545      | 58233478189134896    | 121.76                | (0.00, 132871         | 0.01 (0.00, 59423727  | Laser                |                   | 10535.23          | (0.00, 2965       | 11553708204429963 | 105101772.45          | (0.00, 0.03     | 0.00            | (0.00, 10741497 |                  |
| 0.87              | (0.00, 14206879   | 21648679651076.24    | 0.01                  | (0.00, 29198886       | 0.00 (0.00, 28574717  | 0.00 (0.00, 14165912 | money             |                   | 64805737992517645 | 996627.97         | (0.00, 8707           | 0.00            | (0.00, 18022840 |                 |                  |
| 0.00              | (0.00, 10510171   | 0.00 (0.00, 24012917 | 0.00                  | (0.00, 66271843       | 0.00 (0.00, 55858630  | 0.00 (0.00, 106.57)  | 0.00              | (0.00, 23654218   | 0.00              | (0.00, 29595640   | 103133737876.48       | (7              | Peace           | 0.00            | (0.00, 566069.82 |
| 0.00              | (0.00, 88297629   | 17629126.31          | (17.46, 0.00          | (0.00, 66378286       | 0.00 (0.00, 58563467  | 0.00 (0.00, 38948662 | 0.00              | (0.00, 29595640   | 103133737876.48   | (7                | Peace                 |                 | 0.00            | (0.00, 11003059 |                  |
| 3388.91           | (0.00, 58273      | 22662818563877283    | 386.08                | (0.00, 392880         | 0.12                  | (0.00, 64789700      | 30.10             | (0.00, 4900062    | 180809.91         | (0.00, 133        | 12705884877122506     | 1554787148.86   | (0.00           |                 | Probiotics       |
| 205.04            | (0.00, 675817     | 14326490070467734.20 | (0.00, 47879380       | 0.00 (0.00, 85040573  | 0.92 (0.00, 76564274  | 3745.88              | (0.00, 23124      | 91231175311989960 | 43876646.48       | (0.00, 1          | 0.00                  | (0.00, 10656641 |                 |                 |                  |
| 48583172399791750 | 90339117659138750 | 786123725181457.0    | 75281414437.06        | (0                    | 40782394449006.22     | 21091022864645209    | 23278843419680943 | 4312013098256442  | 5409036028181.45  | (0                |                       |                 |                 |                 |                  |
| 111.40            | (0.00, 626963     | 3304812767729931     | (1.45 (0.00, 13809747 | 0.00 (0.00, 44072515  | 0.02 (0.00, 79103293  | 17.56                | (0.00, 5484954    | 15866992607524266 | 19087254.90       | (0.00, 1          | 0.00                  | (0.00, 62186403 |                 |                 |                  |
| 132.85            | (0.00, 399774     | 9069683347239406     | (0.03 (0.00, 36923980 | 0.00 (0.00, 21246026  | 0.01 (0.00, 11271375  | 135.87               | (0.00, 380184     | 96423371705792150 | 20780188.25       | (0.00, 1          | 0.00                  | (0.00, 18154334 |                 |                 |                  |

|                      |                      |                       |                       |
|----------------------|----------------------|-----------------------|-----------------------|
| 0.10 (0.00, 16291917 | 0.00 (0.00, 53658820 | 0.15 (0.00, 74026898  | 0.04 (0.00, 58222375  |
| 29.03 (0.00, 5602728 | 0.00 (0.00, 20060255 | 365.43 (0.00, 640568  | 31.15 (0.00, 2447007  |
| 0.00 (0.00, 35941342 | 0.00 (0.00, 0.00)    | 0.00 (0.00, 52421976  | 0.00 (0.00, 20572351  |
| 0.00 (0.00, 22415412 | 0.00 (0.00, 38722108 | 0.00 (0.00, 32023617  | 0.00 (0.00, 53928468  |
| 0.01 (0.00, 10614015 | 0.00 (0.00, 99593565 | 2.02 (0.00, 51661781  | 1.05 (0.00, 18710743  |
| 0.00 (0.00, 15794748 | 0.00 (0.00, 0.08)    | 0.00 (0.00, 99300653  | 0.00 (0.00, 85609614  |
| 0.00 (0.00, 11828327 | 0.00 (0.00, 11667577 | 0.99 (0.00, 25878136  | 1.89 (0.00, 13455355  |
| 0.00 (0.00, 20098081 | 0.00 (0.00, 70453969 | 0.00 (0.00, 27431359  | 0.00 (0.00, 22469827  |
| 0.00 (0.00, 11416080 | 0.00 (0.00, 0.00)    | 0.00 (0.00, 16705726  | 0.00 (0.00, 59804123  |
| 0.00 (0.00, 18643620 | 0.00 (0.00, 20061798 | 0.01 (0.00, 15725986  | 0.01 (0.00, 36048854  |
| 0.00 (0.00, 46650966 | 0.00 (0.00, 0.00)    | 0.00 (0.00, 11113104  | 0.00 (0.00, 32200723  |
| 0.24 (0.00, 84524037 | 0.00 (0.00, 40907691 | 0.69 (0.00, 38703867  | 29.65 (0.00, 4083894  |
| 435.09 (0.00, 914316 | 0.00 (0.00, 15799893 | 22675.55 (0.00, 5095  | 27664.93 (0.00, 1636  |
| 1.09 (0.00, 85720831 | 0.00 (0.00, 80493267 | 48.64 (0.00, 4955122  | 1109.18 (0.00, 109589 |
| 0.00 (0.00, 34802356 | 0.00 (0.00, 95466242 | 0.06 (0.00, 68283635  | 0.01 (0.00, 11419142  |
| 0.00 (0.00, 43611583 | 0.00 (0.00, 0.00)    | 0.00 (0.00, 17159074  | 0.00 (0.00, 88662838  |
| 0.00 (0.00, 52018465 | 0.00 (0.00, 0.00)    | 0.00 (0.00, 63331872  | 0.00 (0.00, 20611439  |
| 2194.43 (0.00, 12867 | 0.00 (0.00, 16694787 | 503.22 (0.00, 353615  | 251.83 (0.00, 133121  |
| Silver nitrate       | 0.00 (0.00, 23044968 | 11.42 (0.00, 3784319  | 3.00 (0.00, 33153874  |
| 1267023415621751     | Tramcinolone         | 1243638458607581      | 856132133843612.1     |
| 0.09 (0.00, 60903990 | 0.00 (0.00, 18456638 | Triester Glycerol Oxy | 1.18 (0.00, 18011035  |
| 0.33 (0.00, 13853399 | 0.00 (0.00, 71797328 | 0.85 (0.00, 36947522  | Zinc                  |

## Rank probability

Rank 1 is worst, rank N is best.

| Drug                    | Rank 1 | Rank 2 | Rank 3 | Rank 4 | Rank 5 | Rank 6 | Rank 7 | Rank 8 | Rank 9 | Rank 10 | Rank 11 |
|-------------------------|--------|--------|--------|--------|--------|--------|--------|--------|--------|---------|---------|
| Alliein                 | 0.04   | 0.05   | 0.04   | 0.04   | 0.04   | 0.04   | 0.03   | 0.03   | 0.02   | 0.03    | 0.04    |
| Aloe                    | 0.01   | 0.02   | 0.03   | 0.03   | 0.03   | 0.03   | 0.03   | 0.03   | 0.03   | 0.03    | 0.04    |
| Amlexanox               | 0      | 0      | 0      | 0.03   | 0.08   | 0.16   | 0.2    | 0.2    | 0.14   | 0.09    | 0.05    |
| Benzylamine             | 0.07   | 0.06   | 0.06   | 0.05   | 0.05   | 0.05   | 0.03   | 0.02   | 0.03   | 0.03    | 0.04    |
| Berberine gelatin       | 0.05   | 0.04   | 0.04   | 0.04   | 0.04   | 0.03   | 0.03   | 0.02   | 0.03   | 0.03    | 0.04    |
| Chitosan                | 0.07   | 0.07   | 0.07   | 0.07   | 0.06   | 0.04   | 0.04   | 0.03   | 0.03   | 0.04    | 0.05    |
| Clopetasol              | 0.05   | 0.05   | 0.05   | 0.04   | 0.04   | 0.04   | 0.03   | 0.03   | 0.03   | 0.03    | 0.03    |
| Curcumin                | 0.06   | 0.05   | 0.05   | 0.05   | 0.05   | 0.04   | 0.05   | 0.02   | 0.03   | 0.04    | 0.05    |
| Dexamethasone           | 0      | 0      | 0      | 0      | 0.01   | 0.04   | 0.08   | 0.13   | 0.18   | 0.2     | 0.15    |
| Dioecetite              | 0.05   | 0.05   | 0.05   | 0.05   | 0.04   | 0.03   | 0.03   | 0.02   | 0.02   | 0.03    | 0.05    |
| Doxycycline             | 0.07   | 0.13   | 0.19   | 0.2    | 0.16   | 0.13   | 0.06   | 0.03   | 0.01   | 0.01    | 0       |
| Glycyrrhiza             | 0.05   | 0.05   | 0.04   | 0.04   | 0.04   | 0.03   | 0.03   | 0.02   | 0.02   | 0.03    | 0.03    |
| Honey                   | 0.03   | 0.02   | 0.02   | 0.03   | 0.03   | 0.03   | 0.03   | 0.02   | 0.02   | 0.03    | 0.04    |
| Laser                   | 0      | 0.01   | 0.01   | 0.03   | 0.03   | 0.03   | 0.03   | 0.03   | 0.03   | 0.04    | 0.07    |
| Mincocycline            | 0.05   | 0.05   | 0.05   | 0.04   | 0.06   | 0.04   | 0.03   | 0.03   | 0.03   | 0.03    | 0.04    |
| Penicillin              | 0.27   | 0.2    | 0.14   | 0.11   | 0.1    | 0.07   | 0.05   | 0.03   | 0.02   | 0.01    | 0       |
| Placebo                 | 0      | 0      | 0      | 0      | 0.01   | 0.05   | 0.11   | 0.18   | 0.21   | 0.17    | 0.13    |
| Probiotics              | 0.01   | 0.02   | 0.02   | 0.02   | 0.02   | 0.03   | 0.02   | 0.03   | 0.03   | 0.03    | 0.04    |
| Silver nitrate          | 0.01   | 0.03   | 0.03   | 0.03   | 0.04   | 0.03   | 0.03   | 0.03   | 0.03   | 0.04    | 0.04    |
| Tramcinolone            | 0      | 0      | 0      | 0      | 0      | 0      | 0      | 0      | 0      | 0       | 0       |
| Triester Glycerol Oxide | 0.06   | 0.05   | 0.06   | 0.03   | 0.04   | 0.03   | 0.03   | 0.02   | 0.03   | 0.03    | 0.03    |
| Zinc                    | 0.06   | 0.04   | 0.06   | 0.04   | 0.03   | 0.03   | 0.03   | 0.02   | 0.02   | 0.03    | 0.03    |



|         |         |         |         |         |         |         |         |         |         |         |
|---------|---------|---------|---------|---------|---------|---------|---------|---------|---------|---------|
| Rank 12 | Rank 13 | Rank 14 | Rank 15 | Rank 16 | Rank 17 | Rank 18 | Rank 19 | Rank 20 | Rank 21 | Rank 22 |
| 0.04    | 0.07    | 0.07    | 0.07    | 0.06    | 0.06    | 0.05    | 0.05    | 0.05    | 0.05    | 0.04    |
| 0.05    | 0.06    | 0.06    | 0.06    | 0.07    | 0.07    | 0.07    | 0.06    | 0.06    | 0.06    | 0.06    |
| 0.02    | 0.01    | 0       | 0       | 0       | 0       | 0       | 0       | 0       | 0       | 0       |
| 0.04    | 0.05    | 0.04    | 0.04    | 0.05    | 0.04    | 0.05    | 0.04    | 0.05    | 0.05    | 0.04    |
| 0.04    | 0.05    | 0.05    | 0.07    | 0.06    | 0.06    | 0.06    | 0.05    | 0.05    | 0.08    | 0.04    |
| 0.05    | 0.07    | 0.06    | 0.06    | 0.05    | 0.05    | 0.04    | 0.03    | 0.02    | 0.01    | 0       |
| 0.04    | 0.06    | 0.05    | 0.06    | 0.05    | 0.05    | 0.05    | 0.05    | 0.06    | 0.05    | 0.07    |
| 0.05    | 0.06    | 0.06    | 0.06    | 0.06    | 0.05    | 0.06    | 0.05    | 0.04    | 0.02    | 0       |
| 0.11    | 0.06    | 0.03    | 0.01    | 0       | 0       | 0       | 0       | 0       | 0       | 0       |
| 0.05    | 0.05    | 0.07    | 0.06    | 0.06    | 0.06    | 0.04    | 0.05    | 0.05    | 0.06    | 0.04    |
| 0       | 0       | 0       | 0       | 0       | 0       | 0       | 0       | 0       | 0       | 0       |
| 0.05    | 0.05    | 0.05    | 0.05    | 0.05    | 0.05    | 0.06    | 0.06    | 0.07    | 0.06    | 0.08    |
| 0.04    | 0.05    | 0.05    | 0.06    | 0.06    | 0.07    | 0.06    | 0.06    | 0.05    | 0.07    | 0.12    |
| 0.07    | 0.07    | 0.06    | 0.06    | 0.06    | 0.06    | 0.06    | 0.07    | 0.07    | 0.06    | 0.03    |
| 0.05    | 0.05    | 0.05    | 0.05    | 0.05    | 0.05    | 0.05    | 0.05    | 0.05    | 0.05    | 0.06    |
| 0       | 0       | 0       | 0       | 0       | 0       | 0       | 0       | 0       | 0       | 0       |
| 0.08    | 0.04    | 0.01    | 0       | 0       | 0       | 0       | 0       | 0       | 0       | 0       |
| 0.06    | 0.06    | 0.07    | 0.09    | 0.07    | 0.07    | 0.07    | 0.06    | 0.06    | 0.06    | 0.05    |
| 0.06    | 0.05    | 0.07    | 0.07    | 0.07    | 0.07    | 0.06    | 0.05    | 0.05    | 0.04    | 0.07    |
| 0.01    | 0.01    | 0.03    | 0.04    | 0.06    | 0.08    | 0.1     | 0.16    | 0.16    | 0.18    | 0.15    |
| 0.04    | 0.05    | 0.06    | 0.06    | 0.05    | 0.06    | 0.06    | 0.05    | 0.06    | 0.05    | 0.07    |
| 0.04    | 0.05    | 0.05    | 0.05    | 0.07    | 0.05    | 0.06    | 0.05    | 0.05    | 0.04    | 0.08    |

Consistency check

|                                   |                   |
|-----------------------------------|-------------------|
| Parameter                         | Median (95% CI)   |
| Random Effects Standard Deviation | 1.96 (0.12, 3.15) |

## Convergence Diagnostics

Convergence is assessed using the Brooks-Gelman-Rubin method. This method compares within-chain and between-chain variance to calculate the Potential Scale Reduction Factor (PSRF). A PSRF close to one indicates approximate convergence has been reached.

| Parameter                              | PSRF |
|----------------------------------------|------|
| d.Amlexanox.Clobetasold.Placebo.Aloe   | 1.01 |
| d.Amlexanox.Placebo                    | 1.00 |
| d.Placebo.Allicin                      | 1.01 |
| d.Placebo.Aloe                         | 1.01 |
| d.Placebo.Benzydamine                  | 1.04 |
| d.Placebo.Berberinegelatin             | 1.03 |
| d.Placebo.Chitosan                     | 1.03 |
| d.placebo.Curcumin                     | 1.04 |
| d.Placebo.Dexamethasoned.Placebo.Laser | 1.00 |
| d.Placebo.Diosmectite                  | 1.01 |
| d.Placebo.Doxycycline                  | 1.07 |
| d.Placebo.Glycyrrhiza                  | 1.02 |
| d.Placebo.Honey                        | 1.01 |
| d.Placebo.Laser                        | 1.03 |
| d.Placebo.Minocycline                  | 1.03 |
| d.Placebo.Penicillin                   | 1.07 |
| d.Placebo.Probiotics                   | 1.01 |
| d.Placebo.Silvernitate                 | 1.04 |
| d.Placebo.Triamcinolone                | 1.08 |
| d.Placebo.TriesterGlycerolOxide        | 1.02 |
| d.Placebo.Zinc                         | 1.04 |
| sd.d                                   | 1.00 |

Number of chains : 4  
Tuning iterations : 20,000  
Simulation iterations : 400,000  
Thinning interval : 10  
Inference samples : 80,000  
Variance scaling factor : 2.5

## 2.Inconsistency Model

### Summary estimates for adverse effect

The estimate values for adverse effect are given as risk difference (RD) and 95% confidence interval (CI). The table shows the pooled estimates based on the network meta-analysis during the treatment period for each study.

|                      |                                            |                                      |                                        |                                            |                                                                        |
|----------------------|--------------------------------------------|--------------------------------------|----------------------------------------|--------------------------------------------|------------------------------------------------------------------------|
| Alliin               | 422265.84 (0.00, 158                       | 0.00 (0.00, 85516421                 | 35232234030296.547.93 (0.00, 24350761  | 831925425903763460.00 (0.00, 31049907      | 910467984585.53 (0.00 (0.00, 98940324                                  |
| 0.00 (0.00, 35169296 | 0.00 (0.00, 46947781                       | 22713750037.61 (0.00 (0.00, 52523810 | 1276407829341.87 (0.00 (0.00, 17986047 | 3283788.08 (0.00, 72 (0.00 (0.00, 14341411 |                                                                        |
| 94650.94 (0.00, 8876 | 169041810429.87 (0                         | Amlexanox                            | 62863198160201270                      | 987824.54 (0.00, 974                       | 30857461484745650.00 (0.00, 12062518138542915707380860.03 (0.00, 9.76) |
| 0.00 (0.00, 68538205 | 0.00 (0.00, 14929798                       | 0.00 (0.00, 47912728                 | Perxydantime                           | 0.00 (0.00, 10188422                       | 64.84 (0.00, 17338340.00 (0.00, 19104736                               |
| 0.13 (0.00, 10640292 | 232495554.70 (0.00,                        | 0.00 (0.00, 19267313                 | 58852321262523695                      | Barbentine gelatin                         | 0.00 (0.00, 43822414                                                   |
| 0.00 (0.00, 15767149 | 0.00 (0.00, 90153895                       | 0.00 (0.00, 15.19)                   | 0.02 (0.00, 12528143                   | 0.00 (0.00, 18664025                       | 330322672938804860.00 (0.00, 43822414                                  |
| 128313640154.88 (0   | 70296956814351984                          | 151110011.76 (0.00,                  | 36109862853880890                      | 577825229757310.94                         | 19749517812388528                                                      |
| 0.00 (0.00, 18529853 | 0.00 (0.00, 33088175                       | 0.00 (0.00, 47993683                 | 8459.06 (0.00, 16504                   | 0.00 (0.00, 13774533                       | 593840.28 (0.00, 1030.00 (0.00, 38549881                               |
| 3593403.97 (0.00, 41 | 6065040763170.86 (31.43 (0.10, 21450.83    | 26601751751452710                    | 36984516.01 (0.00, 2                   | 12237882876578760.00 (0.00, 80397817       | 52922940155503080                                                      |
| 0.01 (0.00, 30456428 | 4674069.71 (0.00, 22 (0.00 (0.00, 42645192 | 159842172822236                      | 0.03 (0.00, 41091319                   | 164226620150504980.00 (0.00, 77447509      | 11734841593834.45 (0.00 (0.00, 13651660                                |
| 0.00 (0.00, 15667396 | 0.00 (0.00, 64388183                       | 0.00 (0.00, 0.07)                    | 0.01 (0.00, 17712484                   | 0.00 (0.00, 91148672                       | 7.70 (0.00, 31876142                                                   |
| 0.00 (0.00, 60830700 | 6155116.67 (0.00, 23 (0.00 (0.00, 36805384 | 135066592352402                      | 12.24 (0.00, 29028825                  | 277415757293523480.00 (0.00, 32286278      | 3986507223495.19 (0.00 (0.00, 10493601                                 |
| 15871.16 (0.00, 2412 | 481153680.27 (0.00,                        | 0.01 (0.00, 20908061                 | 78215749904620450                      | 99.78 (0.00, 1937091                       | 105584398621867220.00 (0.00, 11213947                                  |
| 0.00 (0.00, 71385981 | 0.00 (0.00, 62953482                       | 0.00 (0.00, 386081                   | 094273.99 (0.00, 28098                 | 0.00 (0.00, 46374906                       | 1035.85 (0.00, 35388                                                   |
| 0.02 (0.00, 74985556 | 47591.94 (0.00, 1760                       | 0.00 (0.00, 13745429                 | 1682489299731846                       | 7.00 (0.00, 65371725                       | 77385943693983320.00 (0.00, 22520979                                   |
| 0.00 (0.00, 40057517 | 0.00 (0.00, 78356944                       | 0.00 (0.00, 2.53)                    | 236627369.95 (0.00,                    | 0.00 (0.00, 81190738                       | 186837268.63 (0.00, 0.00 (0.00, 48025456                               |
| 1679696.94 (0.00, 17 | 27525128547.20 (16.22 (0.38, 1524.01)      | 11318806839505591                    | 17241818.13 (0.00, 1                   | 4664951532208321                           | 70.00 (0.00, 29655350                                                  |
| 69532.69 (0.00, 2920 | 498696883304.45 (0.16,68 (0.00, 2635201    | 15333360552885422                    | 18197313.67 (0.00, 1                   | 24229502765351440                          | 0.00 (0.00, 20060009                                                   |
| 3108811350585493     | 42902134952894750                          | 1065744093.79 (0.00                  | 87746055000639840                      | 1994128090329077                           | 104852026033468794.99 (0.00, 8737841                                   |
| 0.01 (0.00, 63000346 | 828.65 (0.00, 151351                       | 0.00 (0.00, 31323559                 | 13751212353496.6                       | 0.00 (0.00, 12831286                       | 498551080354059.300.00 (0.00, 75976960                                 |
| 0.00 (0.00, 33590025 | 0.00 (0.00, 50490538                       | 0.00 (0.00, 14361159                 | 407933.33 (0.00, 322                   | 0.00 (0.00, 30855035                       | 4264218.97 (0.00, 95.00 (0.00, 31550031                                |
| 14316349579508516    | 78563561659500100                          | 5432267777.05 (0.00                  | 35801671111418930                      | 72577669483211377                          | 127952634279316411950.60 (0.00, 29213.3341401278637459                 |
|                      |                                            |                                      |                                        |                                            | 141940971.11 (0.00,                                                    |

|                   |                                    |                    |                      |                       |                       |                   |                   |                       |                          |                  |                 |                 |                 |                 |                  |       |                 |
|-------------------|------------------------------------|--------------------|----------------------|-----------------------|-----------------------|-------------------|-------------------|-----------------------|--------------------------|------------------|-----------------|-----------------|-----------------|-----------------|------------------|-------|-----------------|
| 107.84            | (0.00, 499235                      | 25255997735344041  | (215.94              | (0.00, 107200         | (0.00, 0.00, 26700287 | 92575671482862.42 | 58.99             | (0.00, 3721806        | 648418690.41             | (0.00, 0.00      | (0.00, 20214264 | (0.00           | (0.00, 86961249 |                 |                  |       |                 |
| 0.00              | (0.00, 21485820                    | 72339264193.05     | (0.00                | (0.00, 62241819       | (0.00, 0.00, 18457147 | 17361060466.26    | (0.00             | (0.00, 2296670        | 3142.31                  | (0.00, 21042     | (0.00           | (0.00, 30176530 | (0.00, 45807097 |                 |                  |       |                 |
| 255690.79         | (0.00, 234                         | 92743412057263110  | 3567619.48           | (0.00, 1871.56        | (0.00, 1089817        | 53452194804731100 | 29931781.79       | (0.00, 2              | 3898944829886.85         | (0.06            | (0.00, 2.62)    | 0.06            | (0.00, 10246570 |                 |                  |       |                 |
| 0.00              | (0.00, 57627105                    | 102.85             | (0.00, 148140        | (0.00, 0.00, 33743220 | (0.00, 0.00, 22728826 | 0.00              | (0.00, 10161871   | (0.00                 | (0.00, 10410254          | (0.00            | (0.00, 17917877 | (0.00           | (0.00, 29394322 | (0.00, 13629937 |                  |       |                 |
| 36.24             | (0.00, 3497684                     | 104052576995611530 | 0.45                 | (0.00, 15478135       | (0.01                 | (0.00, 15339951   | 3509952562443721  | 3670.84               | (0.00, 43765             | 23263501269.31   | (0.00           | (0.00           | (0.00, 10690893 | (0.00           | (0.00, 39028659  |       |                 |
| 0.00              | (0.00, 10421091                    | 0.13               | (0.00, 34716064      | (0.00, 0.00, 37443659 | (0.00, 0.00, 45056964 | 0.00              | (0.00, 28510690   | (0.00                 | (0.00, 18011418          | (0.00            | (0.00, 40591800 | (0.00           | (0.00, 0.73)    | 0.00            | (0.00, 18672.42) |       |                 |
| 11608982839196.32 | 27205715577314885452367009828209.5 | 166475077131.28    | (0.20158214625206784 | 18404419619070512     | 10580588220554398     | 7684937.76        | (0.00, 28         | 9480048.15            | (0.00, 10                |                  |                 |                 |                 |                 |                  |       |                 |
| 0.00              | (0.00, 55255439                    | 111307.02          | (0.00, 4670.00       | (0.00, 79829125       | (0.00, 0.00, 38146187 | 62.13             | (0.00, 3327582    | (0.00                 | (0.00, 54681853          | (0.00            | (0.00, 28385228 | (0.00           | (0.00, 2800430  | 20.00           | (0.00, 11830219  |       |                 |
| 10046297.76       | (0.00, 8                           | 2973133322359611   | 173717321.58         | (0.00, 2580.25        | (0.00, 302861         | 19293133397510985 | 1037278703.89     | (0.00                 | 171547339584864.6        | 2.11             | (0.03, 188.98)  | 2.78            | (0.00, 38246120 |                 |                  |       |                 |
| Diosmetin         | 590242036700167365.42              | (0.00, 28203600    | 0.01                 | (0.00, 57728881       | 702925166393233.6     | 2769.58           | (0.00, 26058      | 2374673024.05         | (0.00                    | 0.00             | (0.00, 25799331 | (0.00           | (0.00, 20603297 |                 |                  |       |                 |
|                   | 0.00                               | (0.00, 38737556    | Doxycycline          | 0.00                  | (0.00, 53831891       | (0.00             | (0.00, 21534360   | (0.00                 | (0.00, 15421582          | (0.00            | (0.00, 12985025 | (0.00           | (0.00, 12241276 | (0.00           | (0.00, 0.00)     | 0.00  | (0.00, 26435484 |
| 0.18              | (0.00, 21691037                    | 20952522014284008  | Civcymha             | 0.00                  | (0.00, 87711740       | 81030406889873.20 | 56.74             | (0.00, 6207405        | 234976443.60             | (0.00, 0.00      | (0.00, 17721672 | (0.00           | (0.00, 24081971 |                 |                  |       |                 |
| 78.14             | (0.00, 1110167                     | 29625736141736714  | 4468.12              | (0.00, 14782          | Honey                 | 63775538251971040 | 81577.96          | (0.00, 3356           | 6825972172324.43         | (0.00            | (0.00, 12641805 | (0.00           | (0.00, 14547716 |                 |                  |       |                 |
| 0.00              | (0.00, 152065.44                   | 2285.60            | (0.00, 22022         | (0.00, 0.00, 49785358 | (0.00                 | (0.00, 11277612   | Laser             | 0.00                  | (0.00, 36815139          | (0.00            | (0.00, 19510622 | (0.00           | (0.00, 9951.34) | 0.00            | (0.00, 21112247  |       |                 |
| 0.00              | (0.00, 22055068                    | 39194915399782136  | 0.02                 | (0.00, 22290805       | (0.00                 | (0.00, 53211533   | 115049584131465.1 | Minoxycline           | 720562279.42             | (0.00, 0.00      | (0.00, 61741669 | (0.00           | (0.00, 10344326 |                 |                  |       |                 |
| 0.00              | (0.00, 40702659                    | 47346960385        | (0.00, 0.00          | (0.00, 11914176       | (0.00                 | (0.00, 32360757   | 385996.09         | (0.00, 330            | (0.00                    | (0.00, 33791706  | Penicillin      | 0.00            | (0.00, 0.09)    | 0.00            | (0.00, 30548293  |       |                 |
| 4644117.45        | (0.00, 39                          | 12530445733428424  | 66217780.24          | (0.00, 3              | 1210.79               | (0.00, 15158      | 87461960743938740 | 450965706.27          | (0.00, 69903980918295.03 | Placebo          | 1.16            | (0.00, 17422983 |                 |                 |                  |       |                 |
| 19392642.18       | (0.00, 1                           | 41732280048372270  | 1699347270.69        | (0.00                 | 374.98                | (0.00, 948011     | 33548849683196087 | 3281786041.93         | (0.00                    | 1743295870329441 | 0.86            | (0.00, 13943935 | Probiotics      | 0.00            | (0.00, 14991748  |       |                 |
| 846290194869256.4 | 263966948949634901                 | 1984214794461827   | 14414807211254.01    | (115405423831752270   | 278473588183832634    | 9446521458528973  | 58129989.22       | (0.00, 4              | 82639354.19              | (0.00, 5         |                 |                 |                 |                 |                  |       |                 |
| 0.01              | (0.00, 59169732                    | 143243715429094    | 0.06                 | (0.00, 35781368       | (0.00                 | (0.00, 11775026   | 1942652597739.67  | (0.00                 | (0.00, 67477018          | 2667555.10       | (0.00, 53       | (0.00           | (0.00, 11870547 | (0.00           | (0.00, 14991748  |       |                 |
| 0.00              | (0.00, 98369996                    | 6265418.14         | (0.00, 49            | (0.00                 | (0.00, 75143991       | (0.00             | (0.00, 11328819   | 184.34                | (0.00, 115343            | (0.00            | (0.00, 31104613 | (0.00           | (0.00, 30363112 | (0.00           | (0.00, 50507170  | (0.00 | (0.00, 12275404 |
| 28362475570668657 | 16609684621031662                  | 2295391358881130   | 82520788628524.17    | 36126491352282154     | 30670697403123348     | 39534096437820520 | 300661221.92      | (0.00, 31593602259.85 | (0.00                    |                  |                 |                 |                 |                 |                  |       |                 |

|                        |                           |                         |                        |
|------------------------|---------------------------|-------------------------|------------------------|
| 0.00 (0.00, 58465612)  | 124.87 (0.00, 780648)     | 19306951629180.37       | 0.00 (0.00, 70672695)  |
| 0.00 (0.00, 54321569)  | 0.00 (0.00, 10658523)     | 244233680 (0.00, 23     | 0.00 (0.00, 13156973)  |
| 0.00 (0.00, 15290664)  | 9264651.40 (0.00, 10      | 32489790475993466       | 0.00 (0.00, 55686587)  |
| 0.00 (0.00, 12004464)  | 0.00 (0.00, 11565255)     | 0.00 (0.00, 13979627)   | 0.00 (0.00, 16161415)  |
| 0.00 (0.00, 60206393)  | 2953.64 (0.00, 11963)     | 34485730974180.96       | 0.00 (0.00, 15977221)  |
| 0.00 (0.00, 1169.44)   | 0.00 (0.00, 1.35)         | 0.00 (0.00, 90855809)   | 0.00 (0.00, 31654437)  |
| 0.01 (0.00, 51096823)  | 1025608602205931.4        | 40367988301283230       | 0.00 (0.00, 24485696)  |
| 0.00 (0.00, 35734027)  | 0.00 (0.00, 20741168)     | 0.21 (0.00, 56993921)   | 0.00 (0.00, 11558009)  |
| 0.00 (0.00, 58448364)  | 367378735.54 (0.00, 1257  | 1685100086012           | 0.00 (0.00, 16838941)  |
| 0.00 (0.00, 23331217)  | 133.92 (0.00, 170904)     | 8316068628224.52        | 0.00 (0.00, 51679929)  |
| 0.00 (0.00, 1005094.1) | 0.00 (0.00, 65942244)     | 0.00 (0.00, 16230468)   | 0.00 (0.00, 2622231.3) |
| 0.00 (0.00, 71890506)  | 16.26 (0.00, 1585500)     | 3920557116019.13        | 0.00 (0.00, 47051059)  |
| 0.00 (0.00, 52436850)  | 1119936.10 (0.00, 77      | 22002927893239337       | 0.00 (0.00, 11415736)  |
| 0.00 (0.00, 26149242)  | 0.00 (0.00, 14409162)     | 0.01 (0.00, 24906544)   | 0.00 (0.00, 31748075)  |
| 0.00 (0.00, 61925783)  | 200.51 (0.00, 254773)     | 2684234756549.01        | 0.00 (0.00, 72872962)  |
| 0.00 (0.00, 13318730)  | 0.00 (0.00, 41217800)     | 53414.33 (0.00, 8599)   | 0.00 (0.00, 24680416)  |
| 0.00 (0.00, 25750197)  | 160532814.00 (0.00, 52287 | 722753296660            | 0.00 (0.00, 82319368)  |
| 0.00 (0.00, 27581590)  | 68756544.56 (0.00, 4      | 22310219200917148       | 0.00 (0.00, 92490932)  |
| Silver nitrate         | 47353672292945664         | 38467196309905150       | 0.02 (0.00, 27759999)  |
| 0.00 (0.00, 27502052)  | Triamcinolone             | 3574761030.36 (0.00     | 0.00 (0.00, 47059547)  |
| 0.00 (0.00, 19258440)  | 0.00 (0.00, 25484350)     | Triester Glycerol Oxide | 0.00 (0.00, 27100439)  |
| 49.39 (0.00, 4101602)  | 43865511321584940         | 859928419480467830      | Zinc                   |

### Inconsistency Factors

| Cycle                                                   | Median (95% CI)     |
|---------------------------------------------------------|---------------------|
| Aloe , Chitosan , Placebo , Triamcinolone               | 0.06 (-3.99, 3.92)  |
| Aloe , Curcumin , Placebo , Triamcinolone               | -0.04 (-3.96, 3.89) |
| Aloe , Doxycycline , Placebo , Triamcinolone            | -0.04 (-3.80, 3.90) |
| Aloe , Honey , Placebo , Triamcinolone                  | 0.03 (-3.92, 3.97)  |
| Aloe , Laser , Placebo , Triamcinolone                  | -0.02 (-4.02, 4.01) |
| Aloe , Placebo , Probiotics , Triamcinolone             | -0.06 (-4.11, 3.80) |
| Aloe , Honey , Placebo , Silver nitrate , Triamcinolone | -0.06 (-4.01, 3.89) |
| Aloe , Placebo , Triamcinolone                          | -0.01 (-6.14, 3.81) |
| Aloe , Placebo , Triamcinolone                          | -0.01 (-6.14, 3.81) |
| Aloe , Placebo , Triamcinolone                          | -0.01 (-6.14, 3.81) |

### Variance Calculation

| Parameter                         | Median (95% CI)   |
|-----------------------------------|-------------------|
| Random Effects Standard Deviation | 1.89 (0.04, 3.15) |
| Inconsistency Standard Deviation  | 1.62 (0.11, 3.13) |

## Convergence Diagnostics

Convergence is assessed using the Brooks-Gelman-Rubin method. This method compares within-chain and between-chain variance to calculate the Potential Scale Reduction Factor (PSRF). A PSRF close to one indicates approximate convergence has been reached.

| Parameter                                       | PSRF |
|-------------------------------------------------|------|
| d.Allicin.Placebo                               | 1.05 |
| d.Aloe.Triamcinolone                            | 1.46 |
| d.Amlexanox.Clobetasol                          | 1.01 |
| d.Benzydamine.Doxycycline                       | 1.05 |
| d.Honey.Silvernitate                            | 1.03 |
| d.Placebo.Aloe                                  | 1.21 |
| d.Placebo.Amlexanox                             | 1.00 |
| d.Placebo.Berberinegelatin                      | 1.01 |
| d.Placebo.Dexamethasone                         | 1.00 |
| d.Placebo.Diosmectite                           | 1.01 |
| d.Placebo.Glycyrrhiza                           | 1.06 |
| d.Placebo.Minocycline                           | 1.03 |
| d.Placebo.Penicillin                            | 1.12 |
| d.Placebo.Zinc                                  | 1.03 |
| d.Triamcinolone.Benzydamine                     | 1.06 |
| d.Triamcinolone.Chitosan                        | 1.00 |
| d.Triamcinolone.Curcumin                        | 1.06 |
| d.Triamcinolone.Honey                           | 1.02 |
| d.Triamcinolone.Laser                           | 1.02 |
| d.Triamcinolone.Probiotics                      | 1.21 |
| d.Triamcinolone.TriesterGlycerolOxide           | 1.02 |
| w.Aloe.Placebo.Chitosan.Triamcinolone           | 1.01 |
| w.Aloe.Placebo.Curcumin.Triamcinolone           | 1.01 |
| w.Aloe.Placebo.Doxycycline.Triamcinolone        | 1.00 |
| w.Aloe.Placebo.Honey.Triamcinolone              | 1.01 |
| w.Aloe.Placebo.Laser.Triamcinolone              | 1.00 |
| w.Aloe.Placebo.Probiotics.Triamcinolone         | 1.00 |
| w.Aloe.Placebo.Silvernitate.Honey.Triamcinolone | 1.00 |
| w.Aloe.Placebo.Triamcinolone                    | 1.04 |
| w.Aloe.Placebo.Triamcinolone                    | 1.04 |
| w.Aloe.Placebo.Triamcinolone                    | 1.04 |
| sd.d                                            | 1.08 |
| sd.w                                            | 1.00 |

Number of chains : 4  
Tuning iterations : 20,000  
Simulation iterations : 400,000  
Thinning interval : 10  
Inference samples : 80,000  
Variance scaling factor : 2.5

### 3. Node-splitting analysis

#### Node-splitting analysis of inconsistency

Inconsistency between direct and indirect estimates was estimated in the Node-Splitting Model. When P values is above 0.05 in a comparison, there is evidence of statistical inconsistency.

| Name                        | Direct Effect           | Indirect Effect          | Overall                  | P-Value |
|-----------------------------|-------------------------|--------------------------|--------------------------|---------|
| Aloe , Triamcinolone        | -7.97 (-98.59, 62.61)   | -29.79 (-102.07, 29.72)  | -33.64 (-111.19, 51.35)  | 0.68    |
| Chitosan , Placebo          | 15.27 (-37.06, 90.03)   | -23.90 (-88.20, 19.82)   | 3.17 (-58.49, 57.88)     | 0.29    |
| Chitosan , Triamcinolone    | -28.60 (-100.11, -1.28) | -8.02 (-115.88, 79.01)   | -48.98 (-129.63, -2.47)  | 0.64    |
| Curcumin , Placebo          | 10.33 (-57.81, 126.83)  | 67.85 (2.94, 136.18)     | 7.21 (-58.66, 63.56)     | 0.39    |
| Curcumin , Triamcinolone    | -23.70 (-109.95, 28.63) | -37.13 (-103.98, 99.51)  | -45.74 (-126.10, 18.07)  | 0.98    |
| Doxycycline , Triamcinolone | -12.94 (-79.78, 55.58)  | -77.96 (-142.00, -23.35) | -71.28 (-146.09, -24.16) | 0.11    |
| Honey , Silver nitrate      | 9.92 (-69.05, 66.54)    | 10.79 (-60.43, 97.38)    | 6.08 (-89.64, 105.83)    | 0.99    |
| Honey , Triamcinolone       | -12.53 (-85.19, 71.54)  | -33.08 (-122.74, 53.40)  | -25.04 (-124.83, 74.14)  | 0.65    |
| Laser , Placebo             | 10.72 (-28.23, 76.36)   | 17.62 (-63.93, 99.16)    | 18.47 (-19.78, 81.38)    | 0.98    |
| Laser , Triamcinolone       | -16.10 (-79.47, 40.59)  | -27.12 (-100.02, 37.27)  | -31.34 (-108.31, 38.93)  | 0.78    |
| Placebo , Probiotics        | -27.06 (-84.79, 27.66)  | -48.86 (-134.73, 48.69)  | -21.16 (-89.50, 30.03)   | 0.7     |
| Placebo , Triamcinolone     | -16.95 (-125.56, 40.66) | -56.37 (-155.35, -1.52)  | -52.12 (-117.84, -7.89)  | 0.57    |
| Probiotics , Triamcinolone  | -15.04 (-104.14, 55.00) | -29.65 (-98.36, 100.12)  | -29.32 (-112.50, 35.05)  | 0.94    |

### 4. Network structure

#### Network structure of sensitivity analysis

36 RCTs involving 22 local interventions were included in the sensitivity analysis considering the adverse effect.

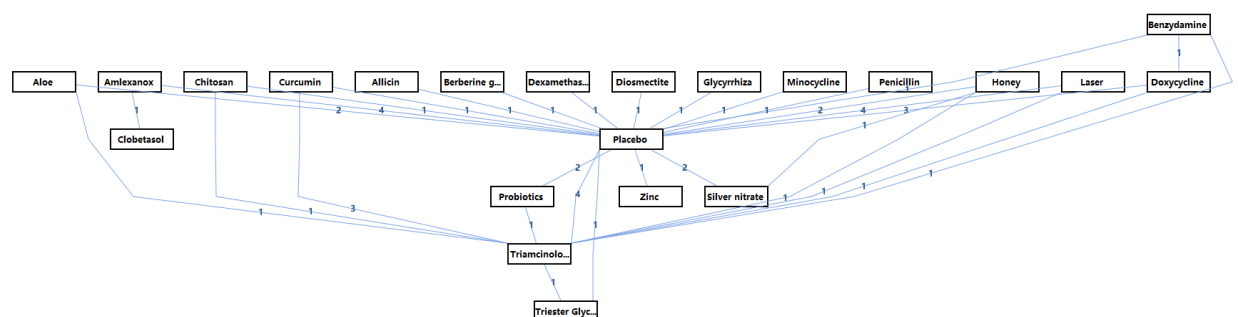



## 5. Pairwise meta-analysis

### Pairwise meta-analysis of adverse effect

Adverse effect were measured by risk difference (RD) and 95% confidence interval (CI).

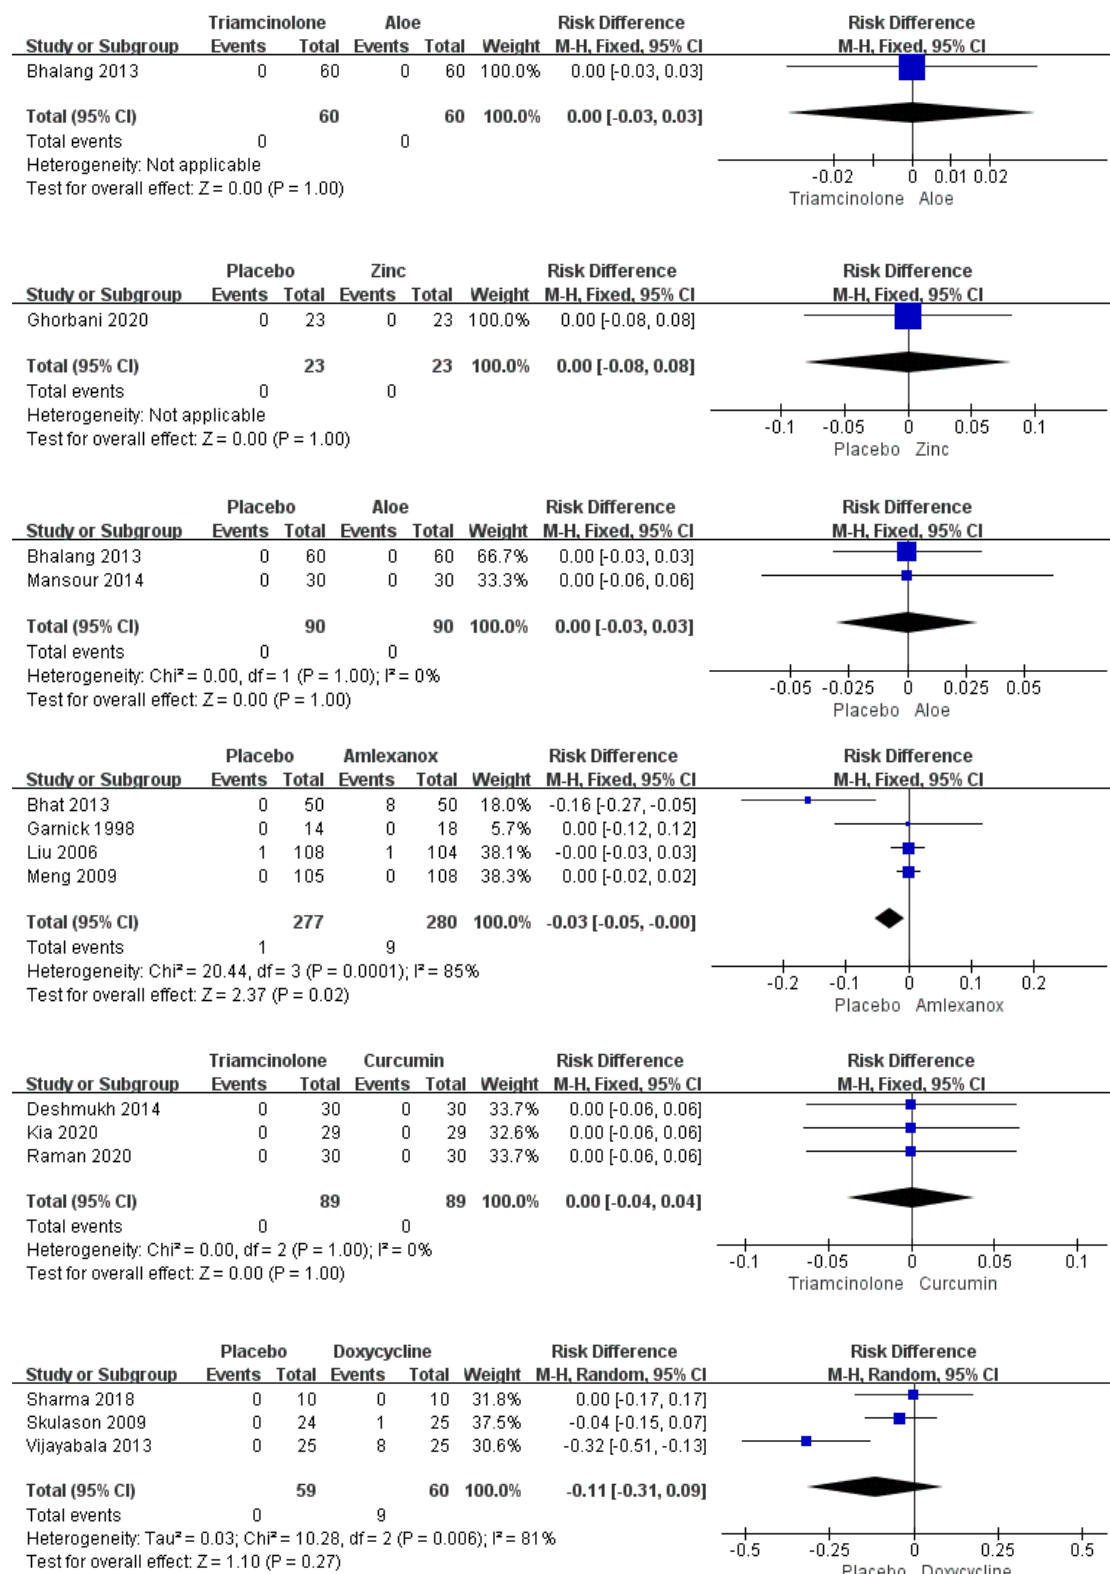



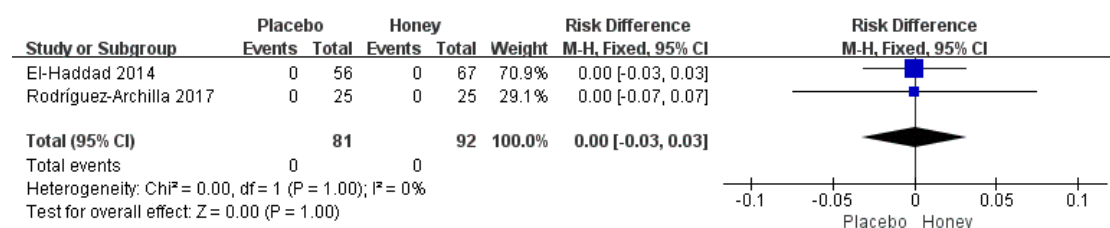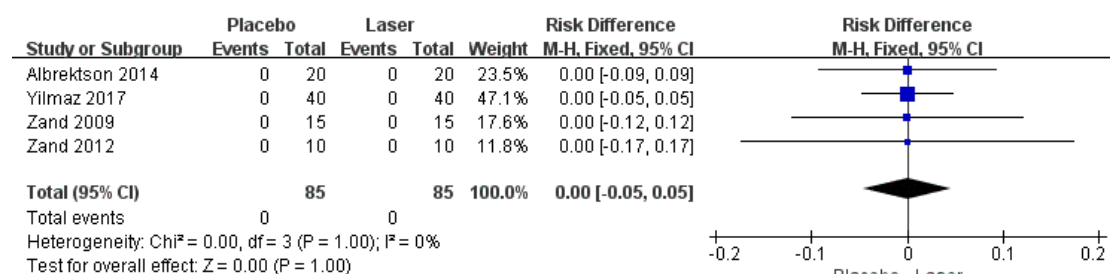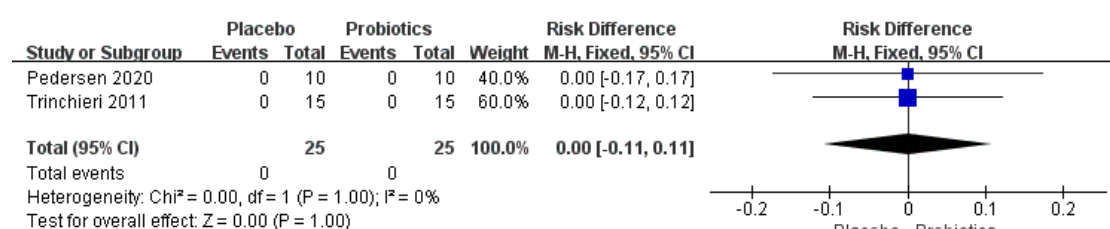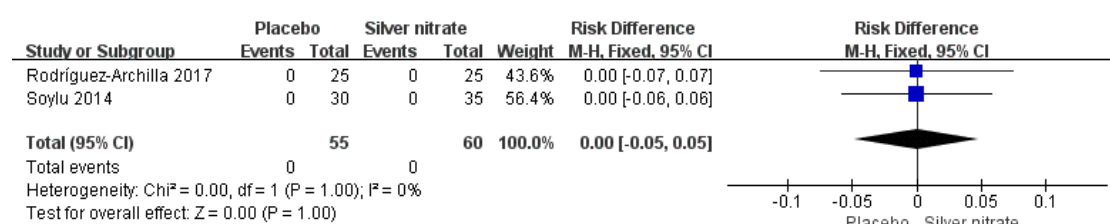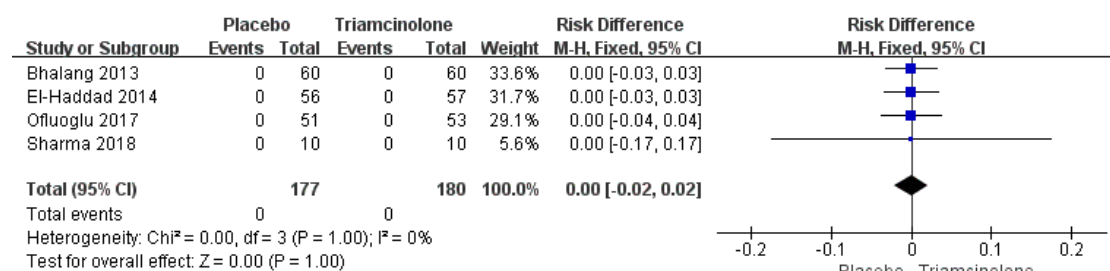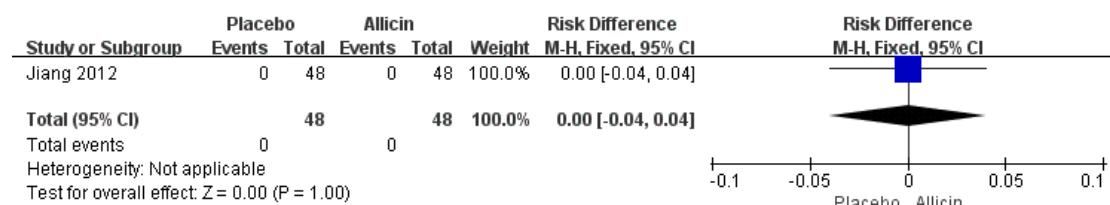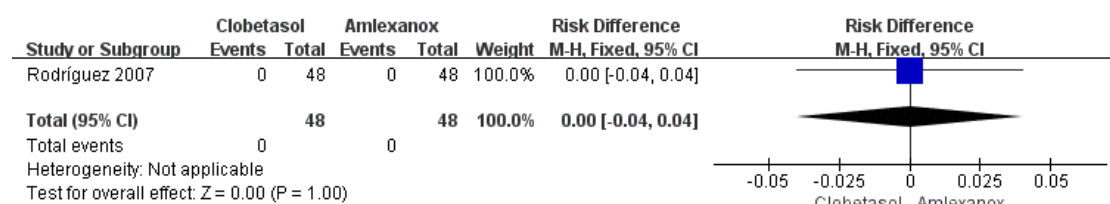

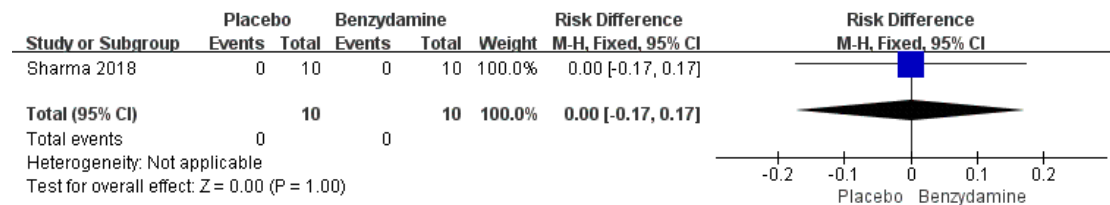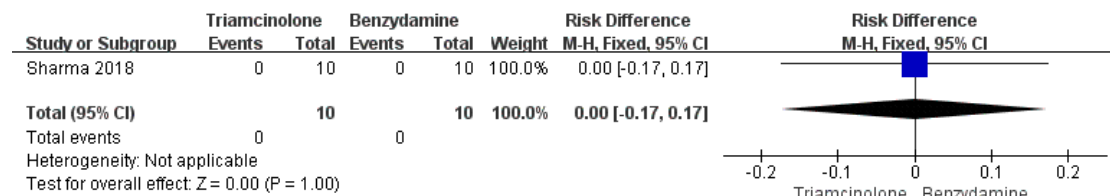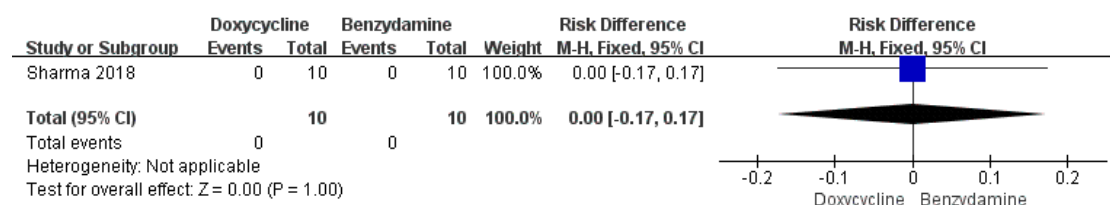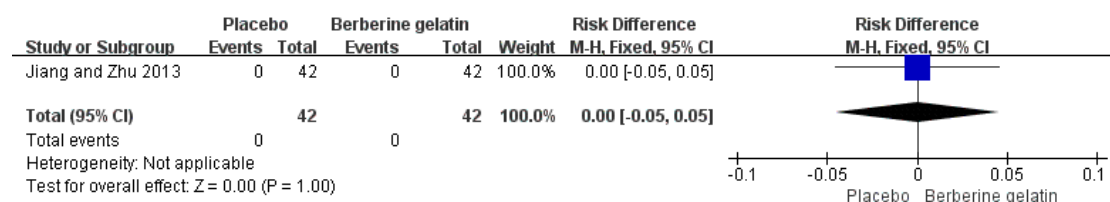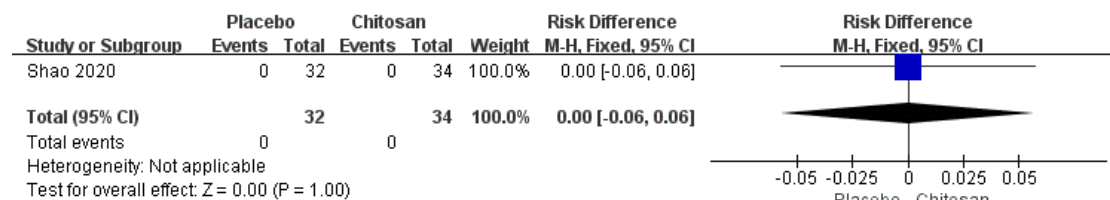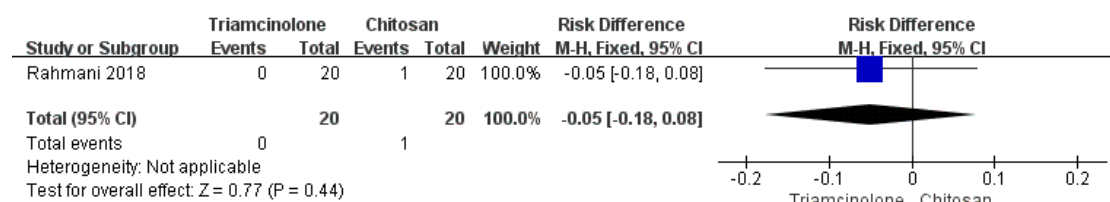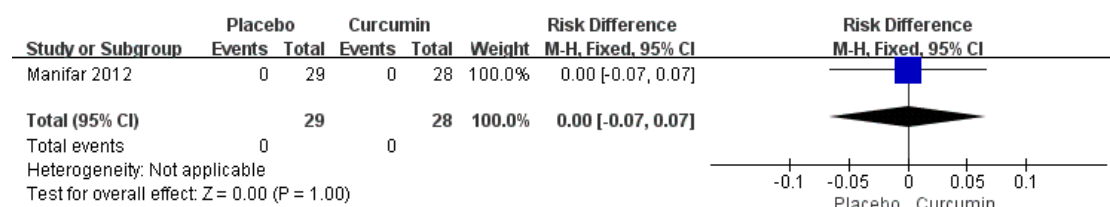

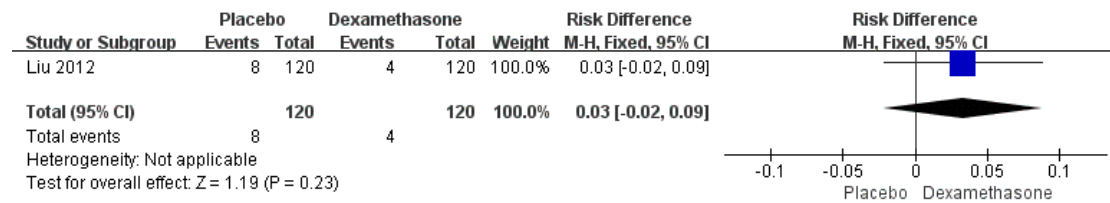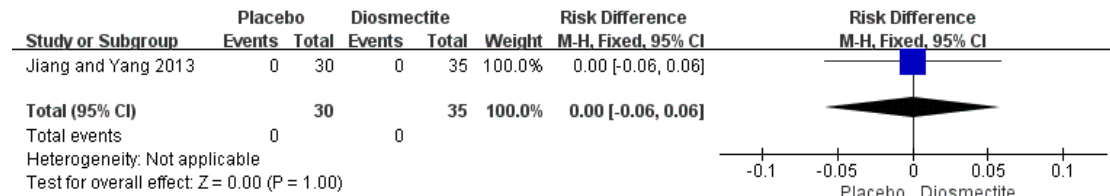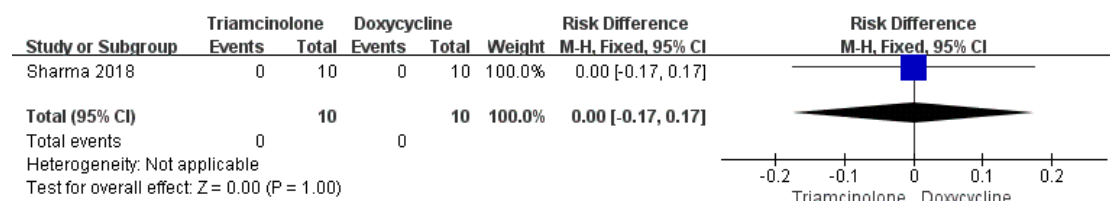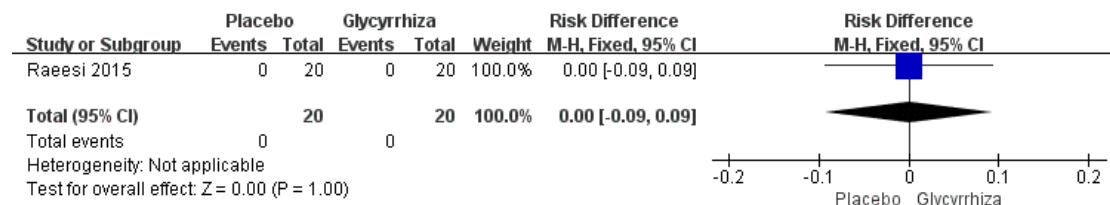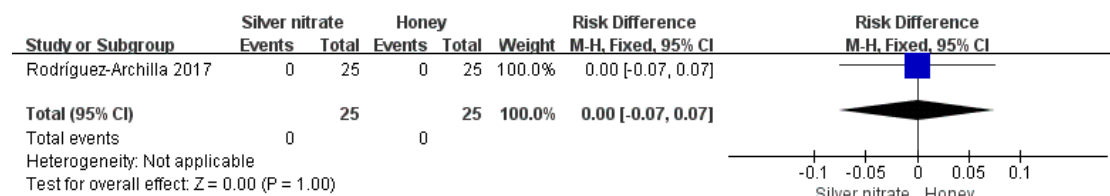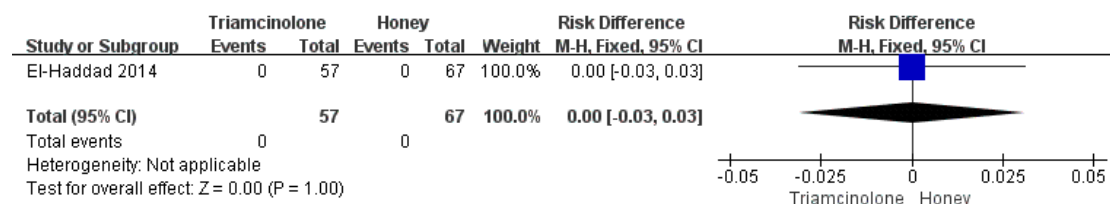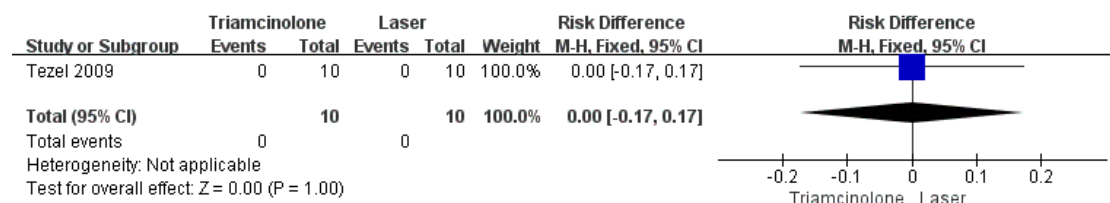

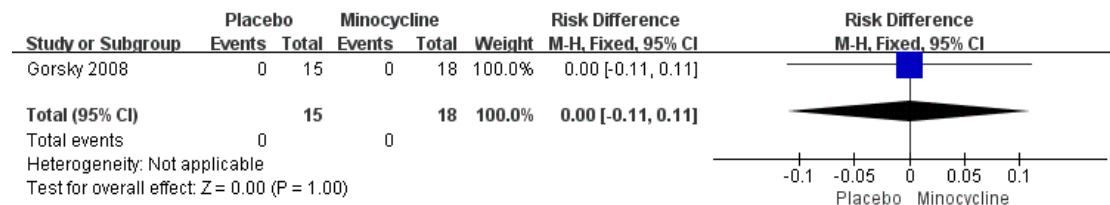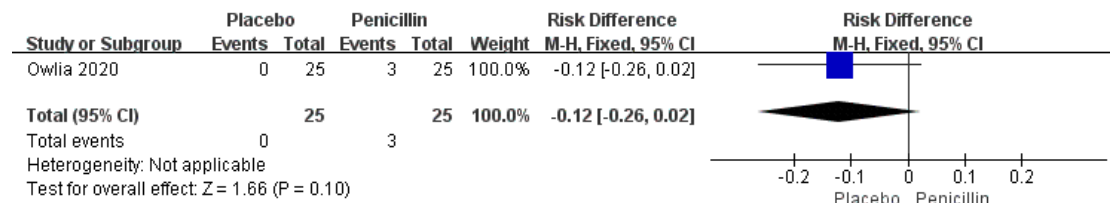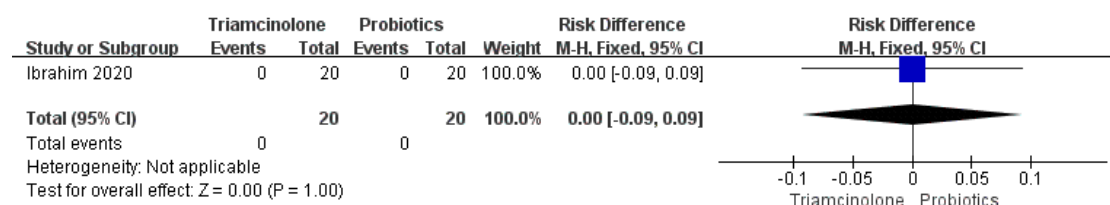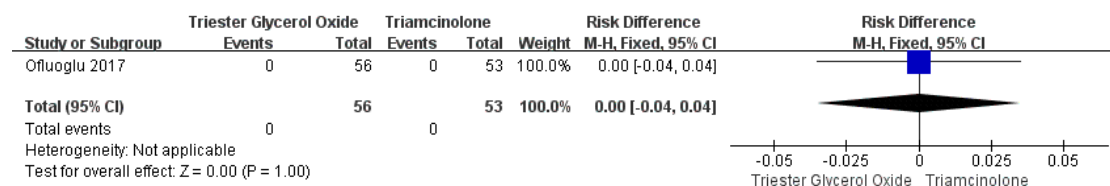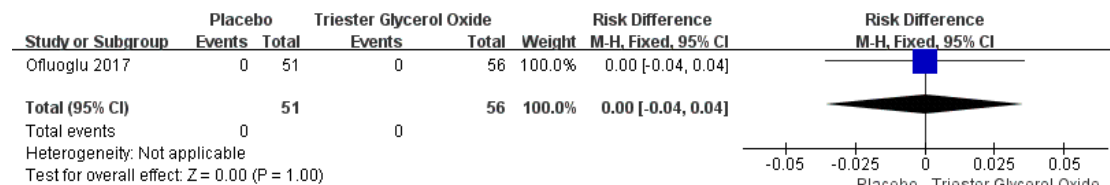

| Comparison           | NO. of included study | Heterogeneity (I <sup>2</sup> ) | Combined effect [RD (95%CI)] |
|----------------------|-----------------------|---------------------------------|------------------------------|
| Allicin vs           |                       |                                 |                              |
| Placebo              | 1                     | NA                              | 0.00 (-0.04, 0.04)           |
| Aloe vs              |                       |                                 |                              |
| Placebo              | 2                     | 0%                              | 0.00 (-0.03,0.03)            |
| Triamcinolone        | 1                     | NA                              | 0.00 (-0.03, 0.03)           |
| Amlexanox vs         |                       |                                 |                              |
| Placebo              | 4                     | 85%                             | -0.03 (-0.05, -0.00)         |
| Clobetasol           | 1                     | NA                              | 0.00 (-0.04, 0.04)           |
| Benzydamine vs       |                       |                                 |                              |
| Placebo              | 1                     | NA                              | 0.00 (-0.17, 0.17)           |
| Doxycycline          | 1                     | NA                              | 0.00 (-0.17, 0.17)           |
| Triamcinolone        | 1                     | NA                              | 0.00 (-0.17, 0.17)           |
| Berberine gelatin vs |                       |                                 |                              |
| Placebo              | 1                     | NA                              | 0.00 (-0.05, 0.05)           |
| Chitosan vs          |                       |                                 |                              |

|                            |   |     |                     |
|----------------------------|---|-----|---------------------|
| Placebo                    | 1 | NA  | 0.00 (-0.06, 0.06)  |
| Triamcinolone              | 1 | NA  | -0.05 (-0.18, 0.08) |
| Curcumin vs                |   |     |                     |
| Triamcinolone              | 3 | 0%  | 0.00 (-0.04, 0.04)  |
| Placebo                    | 1 | NA  | 0.00 (-0.07, 0.07)  |
| Dexamethasone vs           |   |     |                     |
| Placebo                    | 1 | NA  | 0.03 (-0.02, 0.09)  |
| Diosmectite vs             |   |     |                     |
| Placebo                    | 1 | NA  | 0.00 (-0.06, 0.06)  |
| Doxycycline vs             |   |     |                     |
| Placebo                    | 3 | 81% | -0.11 (-0.31, 0.09) |
| Triamcinolone              | 1 | NA  | 0.00 (-0.17, 0.17)  |
| Glycyrrhiza vs             |   |     |                     |
| Placebo                    | 1 | NA  | 0.00 (-0.09, 0.09)  |
| Honey                      |   |     |                     |
| Placebo                    | 2 | 0%  | 0.00 (-0.03, 0.03)  |
| Silver nitrate             | 1 | NA  | 0.00 (-0.07, 0.07)  |
| Triamcinolone              | 1 | NA  | 0.00 (-0.03, 0.03)  |
| Laser vs                   |   |     |                     |
| Placebo                    | 4 | 0%  | 0.00 (-0.05, 0.05)  |
| Triamcinolone              | 1 | NA  | 0.00 (-0.17, 0.17)  |
| Minocycline                |   |     |                     |
| Placebo                    | 1 | NA  | 0.00 (-0.11, 0.11)  |
| Penicillin                 |   |     |                     |
| Placebo                    | 1 | NA  | -0.12 (-0.26, 0.02) |
| Probiotics vs              |   |     |                     |
| Placebo                    | 2 | 0%  | 0.00 (-0.11, 0.11)  |
| Triamcinolone              | 1 | NA  | 0.00 (-0.09, 0.09)  |
| Silver nitrate vs          |   |     |                     |
| Placebo                    | 2 | 0%  | 0.00 (-0.05, 0.05)  |
| Triamcinolone vs           |   |     |                     |
| Placebo                    | 4 | 0%  | 0.00 (-0.02, 0.02)  |
| Triester Glycerol Oxide    | 1 | NA  | 0.00 (-0.04, 0.04)  |
| Triester Glycerol Oxide vs |   |     |                     |
| Placebo                    | 1 | NA  | 0.00 (-0.04, 0.04)  |
| Zinc vs                    |   |     |                     |
| Placebo                    | 1 | NA  | 0.00 (-0.08, 0.08)  |

RD, risk difference; CI, confidence interval; NA, not applicable.

## Hematologic values

4 RCTs included in the study reported on the blood levels of the intervention drug or blood laboratory findings.

| Interventions | Total | Hematologic values                                                                              |
|---------------|-------|-------------------------------------------------------------------------------------------------|
| Dexamethasone | 114   | Blood level<0.502 ng/mL                                                                         |
| Aloe          | 60    | No significant differences between the blood test values before and after 7 days of application |
| Allicin       | 48    | None of the hematologic values at day 6 were considered clinically abnormal                     |
| Amlexanox     | 108   | None of the hematologic values were considered clinically abnormal                              |

## Chapter S5 Relapse

4 included articles described the role of interventions on RAS recurrence. Because different criteria were used for evaluation, only descriptive studies were performed.

| Interventions | Total                                 | Relapse                                                                                                                                                                                         |
|---------------|---------------------------------------|-------------------------------------------------------------------------------------------------------------------------------------------------------------------------------------------------|
| Probiotics    | Adult Group: 30<br>Children group :30 | Adult Group (Outbreak frequency/6 months)<br>Probiotics: 3.33 (0.64)<br>Placebo: 3.65 (0.32)<br>Children group (Outbreak frequency/6 months)<br>Probiotics: 2.65 (0.54)<br>Placebo: 3.65 (0.62) |
| Chlorhexidine | 38                                    | Total ulcer numbers (6 weeks):<br>Chlorhexidine: 7.54±6.52<br>Placebo: 8.32±5.52<br>Interval between ulcers (6 weeks):<br>Chlorhexidine: 7.26±8.61<br>Placebo:3.86±2.05                         |
| Benzydamine   | 18                                    | Number of new ulcers (3 months)<br>Benzydamine: 7 (2-33)<br>Placebo: 8 (2-20)                                                                                                                   |
| Chlorhexidine | 18                                    | Number of new ulcers (3 months)<br>Chlorhexidine: 6.5 (3-20)<br>Placebo: 8 (2-20)                                                                                                               |
| Triamcinolone | 26                                    | No. of new ulcers (8 months)<br>Placebo: 7.81<br>Triamcinolone acetonide in orabase :<br>7.00<br>Triamcinolone acetonide in watery<br>base : 6.42                                               |

**FigureS1 Risk of bias graph**

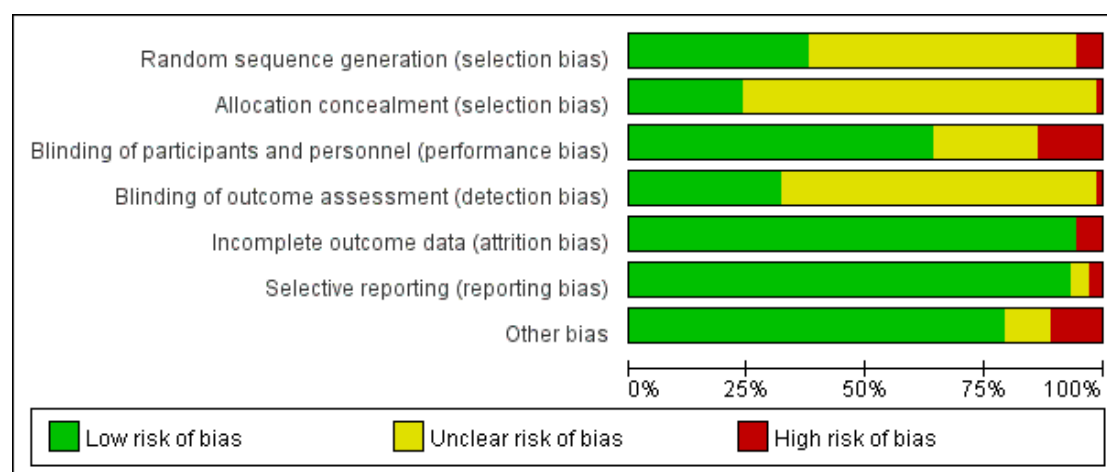



**Figure S2 Risk of bias summary for individual studies**

|                         | Random sequence generation (selection bias) | Allocation concealment (selection bias) | Blinding of participants and personnel (performance bias) | Blinding of outcome assessment (detection bias) | Incomplete outcome data (attrition bias) | Selective reporting (reporting bias) | Other bias |
|-------------------------|---------------------------------------------|-----------------------------------------|-----------------------------------------------------------|-------------------------------------------------|------------------------------------------|--------------------------------------|------------|
| Abbas 2016              | ?                                           | ?                                       | ?                                                         | ?                                               | ?                                        | ?                                    | ?          |
| Addy 1974               | ?                                           | ?                                       | ?                                                         | ?                                               | ?                                        | ?                                    | ?          |
| Addy 1976               | ?                                           | ?                                       | ?                                                         | ?                                               | ?                                        | ?                                    | ?          |
| Aggarwal 2014           | ?                                           | ?                                       | ?                                                         | ?                                               | ?                                        | ?                                    | ?          |
| Aggour 2021             | ?                                           | ?                                       | ?                                                         | ?                                               | ?                                        | ?                                    | ?          |
| Albrektsson 2014        | ?                                           | ?                                       | ?                                                         | ?                                               | ?                                        | ?                                    | ?          |
| Andishe Tadbir 2015     | ?                                           | ?                                       | ?                                                         | ?                                               | ?                                        | ?                                    | ?          |
| Arlian 2006             | ?                                           | ?                                       | ?                                                         | ?                                               | ?                                        | ?                                    | ?          |
| Babaee 2012             | ?                                           | ?                                       | ?                                                         | ?                                               | ?                                        | ?                                    | ?          |
| Bardellini 2020         | ?                                           | ?                                       | ?                                                         | ?                                               | ?                                        | ?                                    | ?          |
| Bhalang 2013            | ?                                           | ?                                       | ?                                                         | ?                                               | ?                                        | ?                                    | ?          |
| Bhat 2013               | ?                                           | ?                                       | ?                                                         | ?                                               | ?                                        | ?                                    | ?          |
| Browne 1968             | ?                                           | ?                                       | ?                                                         | ?                                               | ?                                        | ?                                    | ?          |
| Deshmukh 2014           | ?                                           | ?                                       | ?                                                         | ?                                               | ?                                        | ?                                    | ?          |
| El-Haddad 2014          | ?                                           | ?                                       | ?                                                         | ?                                               | ?                                        | ?                                    | ?          |
| El-Wakeel 2019          | ?                                           | ?                                       | ?                                                         | ?                                               | ?                                        | ?                                    | ?          |
| Galal 2012              | ?                                           | ?                                       | ?                                                         | ?                                               | ?                                        | ?                                    | ?          |
| Garnick 1996            | ?                                           | ?                                       | ?                                                         | ?                                               | ?                                        | ?                                    | ?          |
| Ghorbani 2020           | ?                                           | ?                                       | ?                                                         | ?                                               | ?                                        | ?                                    | ?          |
| Gorsky 2008             | ?                                           | ?                                       | ?                                                         | ?                                               | ?                                        | ?                                    | ?          |
| Greer Jr 1993           | ?                                           | ?                                       | ?                                                         | ?                                               | ?                                        | ?                                    | ?          |
| Halboub 2019            | ?                                           | ?                                       | ?                                                         | ?                                               | ?                                        | ?                                    | ?          |
| Halim 2013              | ?                                           | ?                                       | ?                                                         | ?                                               | ?                                        | ?                                    | ?          |
| Hunter 1987             | ?                                           | ?                                       | ?                                                         | ?                                               | ?                                        | ?                                    | ?          |
| Huo 2021                | ?                                           | ?                                       | ?                                                         | ?                                               | ?                                        | ?                                    | ?          |
| Ibrahim 2020            | ?                                           | ?                                       | ?                                                         | ?                                               | ?                                        | ?                                    | ?          |
| Jiang 2012              | ?                                           | ?                                       | ?                                                         | ?                                               | ?                                        | ?                                    | ?          |
| Jiang and Yang 2013     | ?                                           | ?                                       | ?                                                         | ?                                               | ?                                        | ?                                    | ?          |
| Jiang and Zhu 2013      | ?                                           | ?                                       | ?                                                         | ?                                               | ?                                        | ?                                    | ?          |
| Kavita 2020             | ?                                           | ?                                       | ?                                                         | ?                                               | ?                                        | ?                                    | ?          |
| Khandwala 1997          | ?                                           | ?                                       | ?                                                         | ?                                               | ?                                        | ?                                    | ?          |
| Kia 2020                | ?                                           | ?                                       | ?                                                         | ?                                               | ?                                        | ?                                    | ?          |
| Liu 2006                | ?                                           | ?                                       | ?                                                         | ?                                               | ?                                        | ?                                    | ?          |
| Liu 2012                | ?                                           | ?                                       | ?                                                         | ?                                               | ?                                        | ?                                    | ?          |
| Manifar 2012            | ?                                           | ?                                       | ?                                                         | ?                                               | ?                                        | ?                                    | ?          |
| Manisour 2014           | ?                                           | ?                                       | ?                                                         | ?                                               | ?                                        | ?                                    | ?          |
| Matthews 1987           | ?                                           | ?                                       | ?                                                         | ?                                               | ?                                        | ?                                    | ?          |
| Meng 2009               | ?                                           | ?                                       | ?                                                         | ?                                               | ?                                        | ?                                    | ?          |
| Miles 1993              | ?                                           | ?                                       | ?                                                         | ?                                               | ?                                        | ?                                    | ?          |
| Moghadamnia 2009        | ?                                           | ?                                       | ?                                                         | ?                                               | ?                                        | ?                                    | ?          |
| Nasry 2016              | ?                                           | ?                                       | ?                                                         | ?                                               | ?                                        | ?                                    | ?          |
| Nirmala 2019            | ?                                           | ?                                       | ?                                                         | ?                                               | ?                                        | ?                                    | ?          |
| Offuogu 2017            | ?                                           | ?                                       | ?                                                         | ?                                               | ?                                        | ?                                    | ?          |
| Owlia 2020              | ?                                           | ?                                       | ?                                                         | ?                                               | ?                                        | ?                                    | ?          |
| Pandya 2017             | ?                                           | ?                                       | ?                                                         | ?                                               | ?                                        | ?                                    | ?          |
| Pedersen 2020           | ?                                           | ?                                       | ?                                                         | ?                                               | ?                                        | ?                                    | ?          |
| Prasad 2013             | ?                                           | ?                                       | ?                                                         | ?                                               | ?                                        | ?                                    | ?          |
| Raeesi 2015             | ?                                           | ?                                       | ?                                                         | ?                                               | ?                                        | ?                                    | ?          |
| Rahmani 2018            | ?                                           | ?                                       | ?                                                         | ?                                               | ?                                        | ?                                    | ?          |
| Raman 2020              | ?                                           | ?                                       | ?                                                         | ?                                               | ?                                        | ?                                    | ?          |
| Rodriguez 2007          | ?                                           | ?                                       | ?                                                         | ?                                               | ?                                        | ?                                    | ?          |
| Rodriguez-Archilla 2017 | ?                                           | ?                                       | ?                                                         | ?                                               | ?                                        | ?                                    | ?          |
| Sattayut 2013           | ?                                           | ?                                       | ?                                                         | ?                                               | ?                                        | ?                                    | ?          |
| Seyedi 2020             | ?                                           | ?                                       | ?                                                         | ?                                               | ?                                        | ?                                    | ?          |
| Shao 2020               | ?                                           | ?                                       | ?                                                         | ?                                               | ?                                        | ?                                    | ?          |
| Sharma 2018             | ?                                           | ?                                       | ?                                                         | ?                                               | ?                                        | ?                                    | ?          |
| Shi 2020                | ?                                           | ?                                       | ?                                                         | ?                                               | ?                                        | ?                                    | ?          |
| Skulason 2009           | ?                                           | ?                                       | ?                                                         | ?                                               | ?                                        | ?                                    | ?          |
| Soliman 2019            | ?                                           | ?                                       | ?                                                         | ?                                               | ?                                        | ?                                    | ?          |
| Soylu 2014              | ?                                           | ?                                       | ?                                                         | ?                                               | ?                                        | ?                                    | ?          |
| Soylu and Okuyucu 2014  | ?                                           | ?                                       | ?                                                         | ?                                               | ?                                        | ?                                    | ?          |
| Tavangar 2019           | ?                                           | ?                                       | ?                                                         | ?                                               | ?                                        | ?                                    | ?          |
| Taylor 1993             | ?                                           | ?                                       | ?                                                         | ?                                               | ?                                        | ?                                    | ?          |
| Tezel 2009              | ?                                           | ?                                       | ?                                                         | ?                                               | ?                                        | ?                                    | ?          |
| Tinchien 2011           | ?                                           | ?                                       | ?                                                         | ?                                               | ?                                        | ?                                    | ?          |
| Vijayabala 2013         | ?                                           | ?                                       | ?                                                         | ?                                               | ?                                        | ?                                    | ?          |
| Yeoman 1978             | ?                                           | ?                                       | ?                                                         | ?                                               | ?                                        | ?                                    | ?          |
| Yilmaz 2017             | ?                                           | ?                                       | ?                                                         | ?                                               | ?                                        | ?                                    | ?          |
| Ylikorhola 1997         | ?                                           | ?                                       | ?                                                         | ?                                               | ?                                        | ?                                    | ?          |
| Zand 2009               | ?                                           | ?                                       | ?                                                         | ?                                               | ?                                        | ?                                    | ?          |
| Zand 2012               | ?                                           | ?                                       | ?                                                         | ?                                               | ?                                        | ?                                    | ?          |
| Zeni 2017               | ?                                           | ?                                       | ?                                                         | ?                                               | ?                                        | ?                                    | ?          |

# Funnel plots

Figure S3 Funnel plot for healing effect

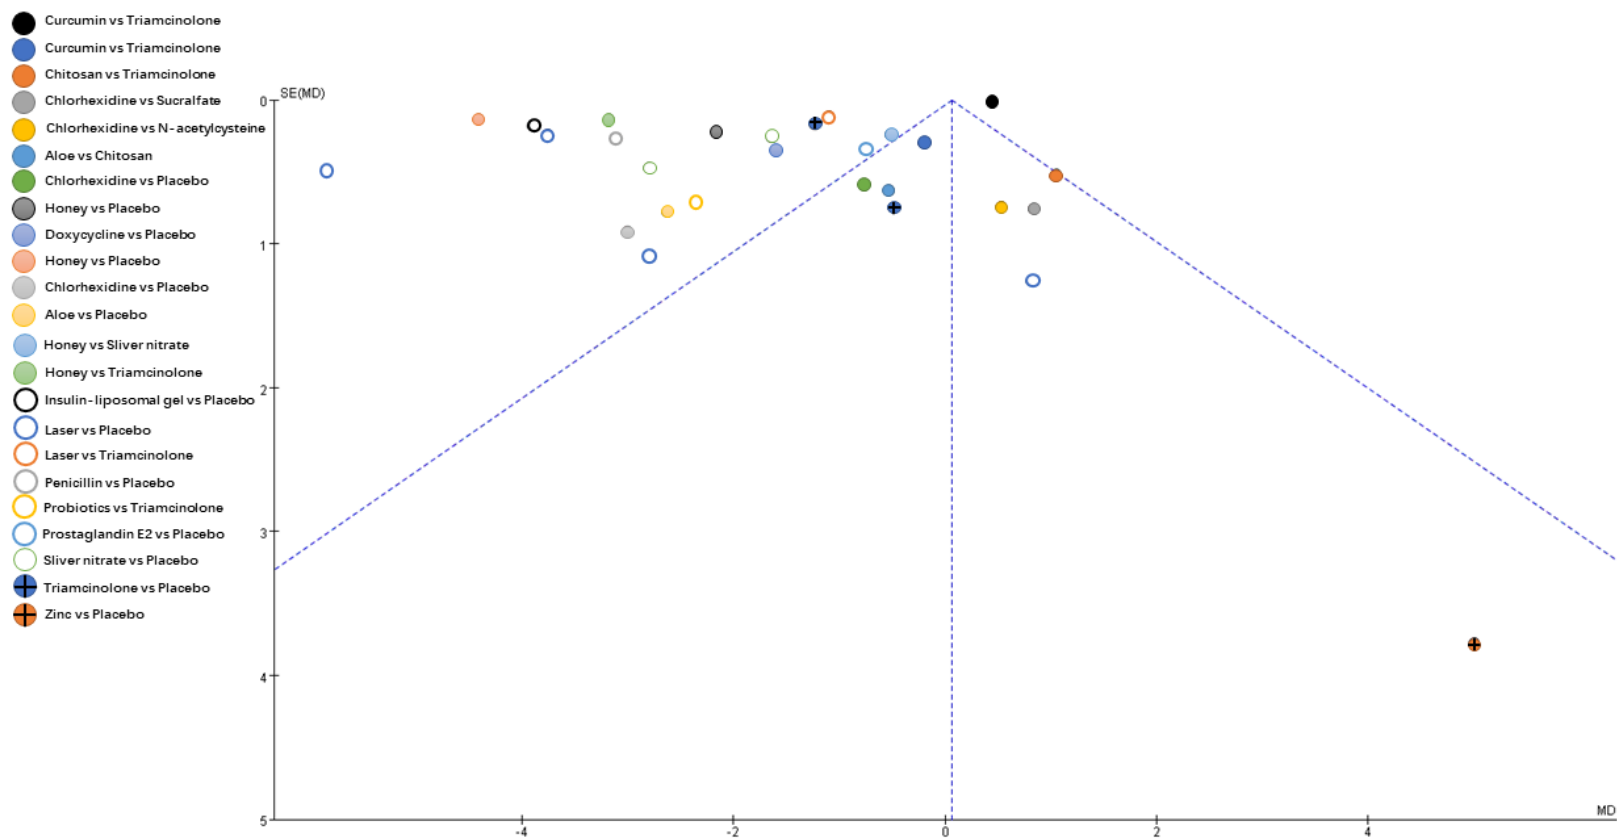

Figure S4 Funnel plot for size-reducing effect

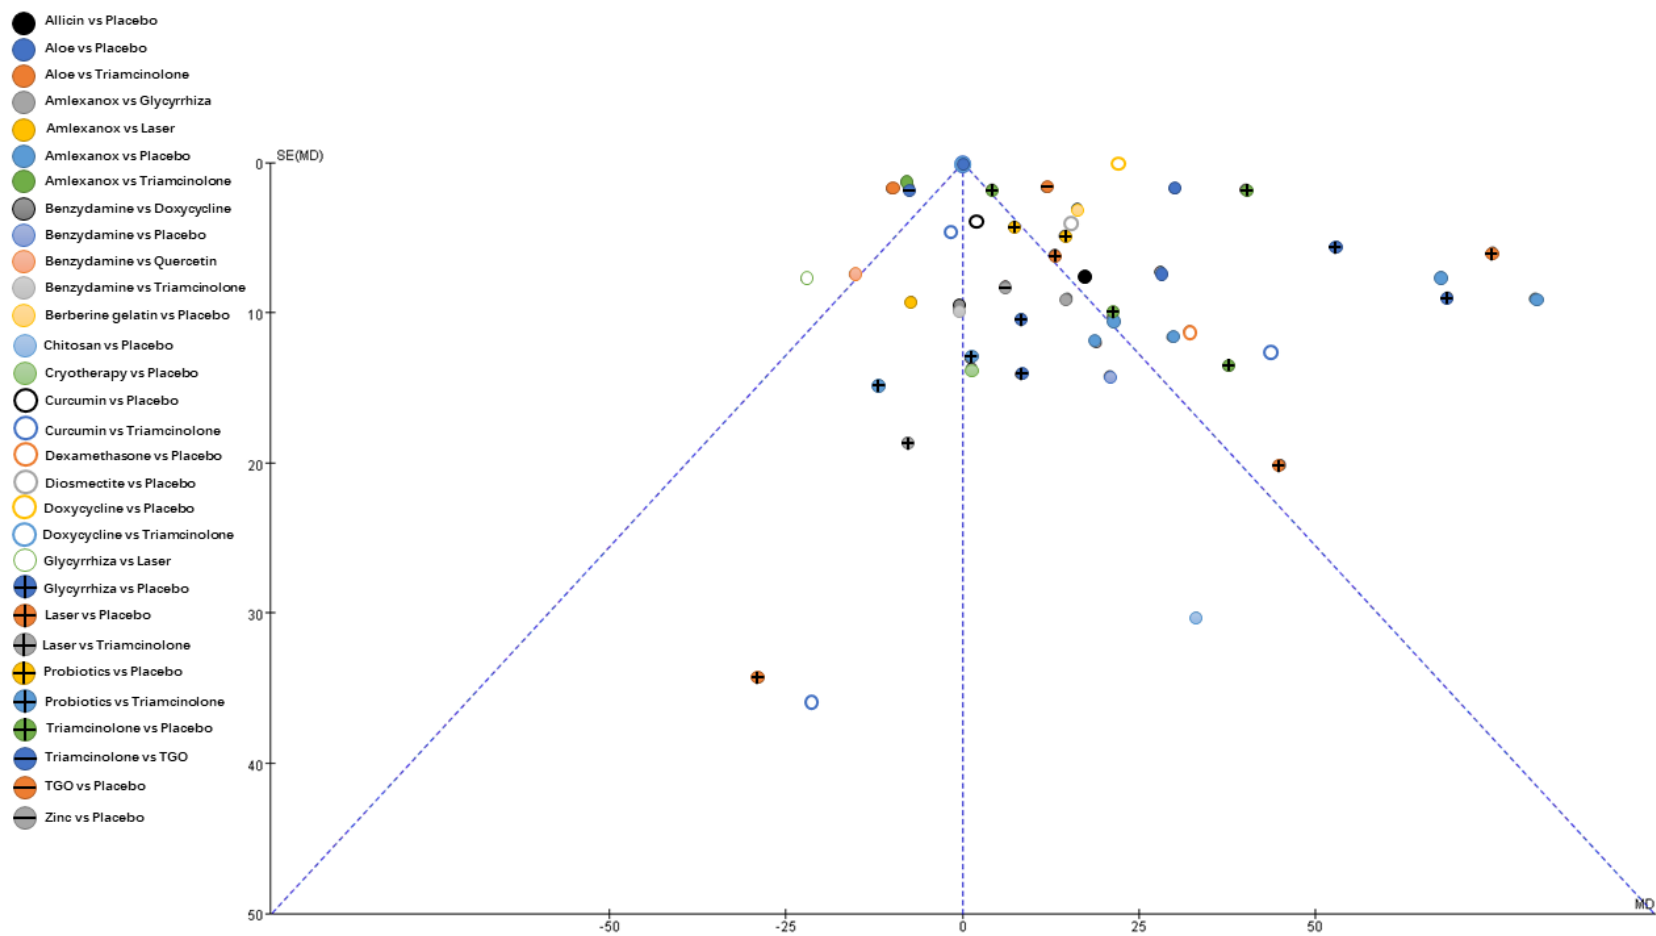

Figure S5 Funnel plot for symptom-reducing effect

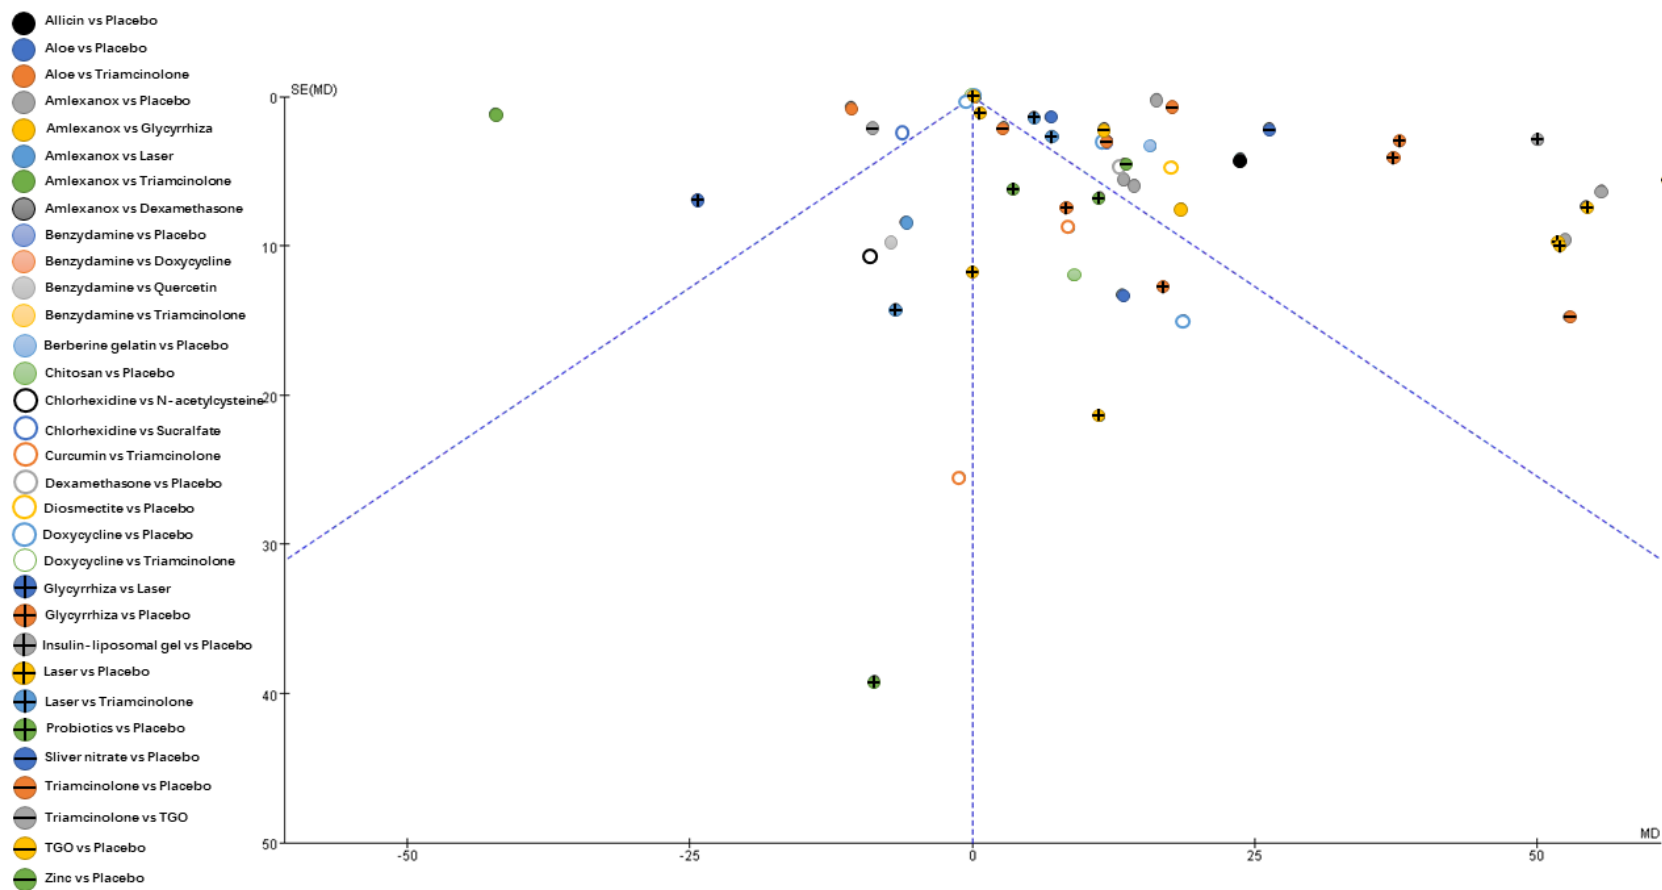

Figure S6 Funnel plot for adverse effect

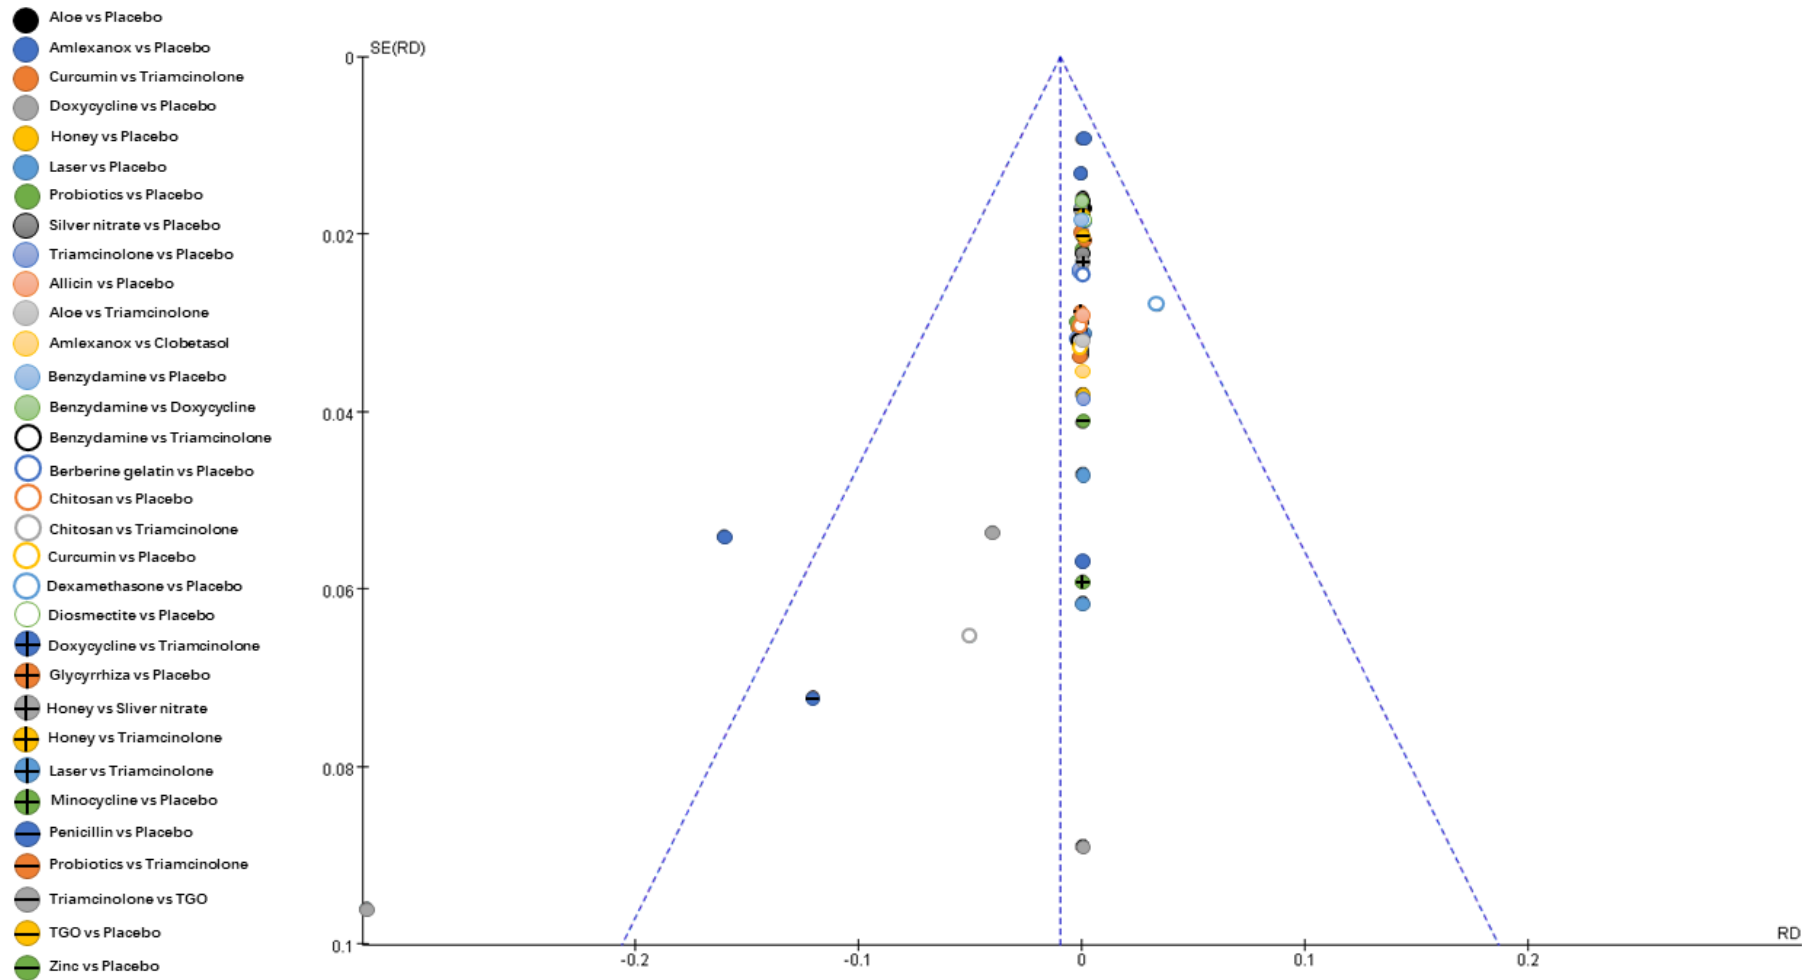

## Figure S7 Network structure of sensitivity analysis

Network structure of sensitivity analysis. 69 RCTs were considered in sensitivity analysis for the four outcomes. (a) Healing effect, data from 26 RCTs (1306 participants) with 20 pairwise comparisons among 18 interventions were pooled. (b) Size-reducing effect, data from 37 RCTs (3587 participants) with 30 pairwise comparisons among 19 interventions were pooled. (c) Symptom-reducing effect, data from 46 RCTs (4020 participants) with 32 pairwise comparisons among 23 interventions were pooled. (d) Adverse effect, data from 36 RCTs (2787 participants) with 32 pairwise comparisons among 22 interventions were pooled. Nodes and edges are weighted according to volume of studies including that treatment or comparison.

**(a). Healing effect**

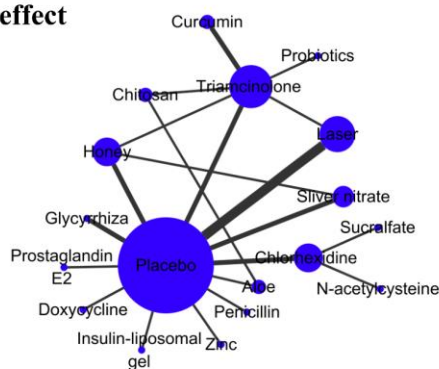

**(b). Size-reducing effect**

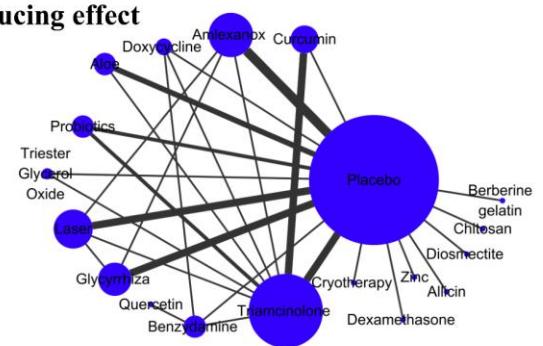

**(c). Symptom-reducing effect**

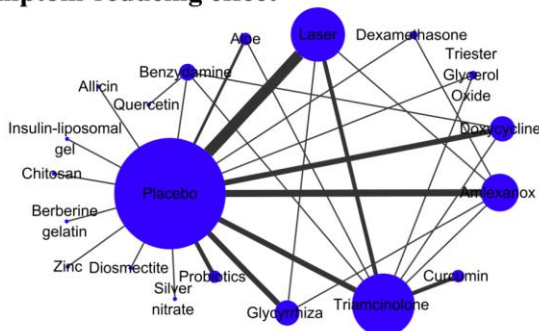

**(d). Adverse effect**

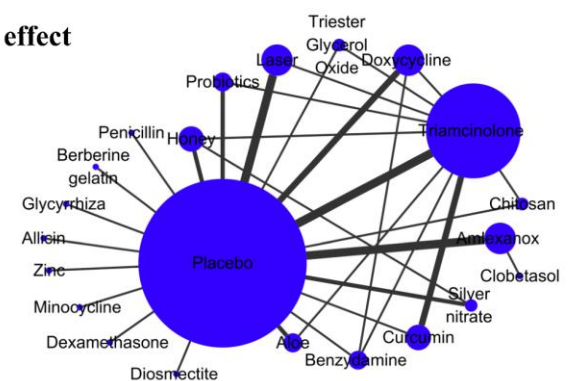

**Table S11 PRISMA NMA Checklist of Items**

| Section/Topic             | Item # | Checklist Item                                                                                                                                                                                         | Reported on Page # |
|---------------------------|--------|--------------------------------------------------------------------------------------------------------------------------------------------------------------------------------------------------------|--------------------|
| <b>TITLE</b>              |        |                                                                                                                                                                                                        |                    |
| Title                     | 1      | Identify the report as a systematic review <i>incorporating a network meta-analysis (or related form of meta-analysis)</i> .                                                                           | 1                  |
| <b>ABSTRACT</b>           |        |                                                                                                                                                                                                        |                    |
| Structured summary        | 2      | Provide a structured summary including: <b>Background, Methods, Results, Discussion/Conclusions, and Other.</b>                                                                                        | 2                  |
| <b>INTRODUCTION</b>       |        |                                                                                                                                                                                                        |                    |
| Rationale                 | 3      | Describe the rationale for the review in the context of what is already known, <i>including mention of why a network meta-analysis has been conducted</i> .                                            | 3-4                |
| Objectives                | 4      | Provide an explicit statement of questions being addressed, with reference to participants, interventions, comparisons, outcomes, and study design (PICOS).                                            | 3-4                |
| <b>METHODS</b>            |        |                                                                                                                                                                                                        |                    |
| Protocol and registration | 5      | Indicate whether a review protocol exists and if and where it can be accessed (e.g., Web address); and, if available, provide registration information, including registration number.                 | 4                  |
| Eligibility criteria      | 6      | Specify study characteristics (e.g., PICOS, length of follow-up) and report characteristics (e.g., years considered, language, publication status) used as criteria for eligibility, giving rationale. | 4                  |
| Information sources       | 7      | Describe all information sources (e.g., databases with dates of coverage, contact with study authors to identify additional studies) in the search and date last searched.                             | 4                  |
| Search                    | 8      | Present full electronic search strategy for at least one database, including any limits used, such that it could be repeated.                                                                          | Table S1-S5        |
| Study selection           | 9      | State the process for selecting studies (i.e., screening, eligibility, included in systematic review, and, if applicable, included in the meta-analysis).                                              | Fig. 1             |
| Data collection process   | 10     | Describe method of data extraction from reports (e.g., piloted forms, independently, in duplicate)                                                                                                     | 4-6                |

|                                        |           |                                                                                                                                                                                                                                                                                                                                                                                                                                                   |     |
|----------------------------------------|-----------|---------------------------------------------------------------------------------------------------------------------------------------------------------------------------------------------------------------------------------------------------------------------------------------------------------------------------------------------------------------------------------------------------------------------------------------------------|-----|
|                                        |           | and any processes for obtaining and confirming data from investigators.                                                                                                                                                                                                                                                                                                                                                                           |     |
| Data items                             | 11        | List and define all variables for which data were sought (e.g., PICOS, funding sources) and any assumptions and simplifications made.                                                                                                                                                                                                                                                                                                             | 4-6 |
| <b>Geometry of the network</b>         | <b>S1</b> | Describe methods used to explore the geometry of the treatment network under study and potential biases related to it. This should include how the evidence base has been graphically summarized for presentation, and what characteristics were compiled and used to describe the evidence base to readers.                                                                                                                                      | 5   |
| Risk of bias within individual studies | 12        | Describe methods used for assessing risk of bias of individual studies (including specification of whether this was done at the study or outcome level), and how this information is to be used in any data synthesis.                                                                                                                                                                                                                            | 5   |
| Summary measures                       | 13        | State the principal summary measures (e.g., risk ratio, difference in means).                                                                                                                                                                                                                                                                                                                                                                     | 5   |
| Planned methods of analysis            | 14        | Describe the methods of handling data and combining results of studies for each network meta-analysis. This should include, but not be limited to: <ul style="list-style-type: none"> <li>• <i>Handling of multi-arm trials;</i></li> <li>• <i>Selection of variance structure;</i></li> <li>• <i>Selection of prior distributions in Bayesian analyses; and</i></li> <li>• <i>Assessment of model fit.</i></li> </ul>                            | 5   |
| <b>Assessment of Inconsistency</b>     | <b>S2</b> | Describe the statistical methods used to evaluate the agreement of direct and indirect evidence in the treatment network(s) studied. Describe efforts taken to address its presence when found.                                                                                                                                                                                                                                                   | 5   |
| Risk of bias across studies            | 15        | Specify any assessment of risk of bias that may affect the cumulative evidence (e.g., publication bias, selective reporting within studies).                                                                                                                                                                                                                                                                                                      | 5   |
| Additional analyses                    | 16        | Describe methods of additional analyses if done, indicating which were pre-specified. This may include, but not be limited to, the following: <ul style="list-style-type: none"> <li>• Sensitivity or subgroup analyses;</li> <li>• Meta-regression analyses;</li> <li>• <i>Alternative formulations of the treatment network; and</i></li> <li>• <i>Use of alternative prior distributions for Bayesian analyses (if applicable).</i></li> </ul> | 5   |



|                                          |           |                                                                                                                                                                                                                                                                                                                                   |              |
|------------------------------------------|-----------|-----------------------------------------------------------------------------------------------------------------------------------------------------------------------------------------------------------------------------------------------------------------------------------------------------------------------------------|--------------|
| <b>RESULTS†</b>                          |           |                                                                                                                                                                                                                                                                                                                                   |              |
| Study selection                          | 17        | Give numbers of studies screened, assessed for eligibility, and included in the review, with reasons for exclusions at each stage, ideally with a flow diagram.                                                                                                                                                                   | 6            |
| <b>Presentation of network structure</b> | <b>S3</b> | Provide a network graph of the included studies to enable visualization of the geometry of the treatment network.                                                                                                                                                                                                                 | Fig. 2       |
| <b>Summary of network geometry</b>       | <b>S4</b> | Provide a brief overview of characteristics of the treatment network. This may include commentary on the abundance of trials and randomized patients for the different interventions and pairwise comparisons in the network, gaps of evidence in the treatment network, and potential biases reflected by the network structure. | 7-9          |
| Study characteristics                    | 18        | For each study, present characteristics for which data were extracted (e.g., study size, PICOS, follow-up period) and provide the citations.                                                                                                                                                                                      | Table S4     |
| Risk of bias within studies              | 19        | Present data on risk of bias of each study and, if available, any outcome level assessment.                                                                                                                                                                                                                                       | Figure S1-S2 |
| Results of individual studies            | 20        | For all outcomes considered (benefits or harms), present, for each study: 1) simple summary data for each intervention group, and 2) effect estimates and confidence intervals.                                                                                                                                                   | Table S6     |
| Synthesis of results                     | 21        | Present results of each meta-analysis done, including confidence/credible intervals. If additional summary measures were explored (such as treatment rankings), these should also be presented.                                                                                                                                   | 7-8          |
| <b>Exploration for inconsistency</b>     | <b>S5</b> | Describe results from investigations of inconsistency. This may include such information as measures of model fit to compare consistency and inconsistency models, <i>P</i> values from statistical tests, or summary of inconsistency estimates from different parts of the treatment network.                                   | 11           |
| Risk of bias across studies              | 22        | Present results of any assessment of risk of bias across studies for the evidence base being studied.                                                                                                                                                                                                                             | 8            |
| Results of additional analyses           | 23        | Give results of additional analyses, if done (e.g., sensitivity or subgroup analyses, meta-regression analyses, <i>alternative network geometries studied</i> , <i>alternative choice of prior distributions for</i>                                                                                                              | 8-9          |

|                     |    |                                                                                                                                                                                                                                                                                                                                                                                                                                |       |
|---------------------|----|--------------------------------------------------------------------------------------------------------------------------------------------------------------------------------------------------------------------------------------------------------------------------------------------------------------------------------------------------------------------------------------------------------------------------------|-------|
|                     |    | <i>Bayesian analyses, and so forth).</i>                                                                                                                                                                                                                                                                                                                                                                                       |       |
| <b>DISCUSSION</b>   |    |                                                                                                                                                                                                                                                                                                                                                                                                                                |       |
| Summary of evidence | 24 | Summarize the main findings, including the strength of evidence for each main outcome; consider their relevance to key groups (e.g., healthcare providers, users, and policy-makers).                                                                                                                                                                                                                                          | 15-17 |
| Limitations         | 25 | Discuss limitations at study and outcome level (e.g., risk of bias), and at review level (e.g., incomplete retrieval of identified research, reporting bias). <i>Comment on the validity of the assumptions, such as transitivity and consistency. Comment on any concerns regarding network geometry (e.g., avoidance of certain comparisons).</i>                                                                            | 17    |
| Conclusions         | 26 | Provide a general interpretation of the results in the context of other evidence, and implications for future research.                                                                                                                                                                                                                                                                                                        | 17    |
| <b>FUNDING</b>      |    |                                                                                                                                                                                                                                                                                                                                                                                                                                |       |
| Funding             | 27 | Describe sources of funding for the systematic review and other support (e.g., supply of data); role of funders for the systematic review. This should also include information regarding whether funding has been received from manufacturers of treatments in the network and/or whether some of the authors are content experts with professional conflicts of interest that could affect use of treatments in the network. | 17    |
